# Supplementary material for: Human LINE-1 retrotransposition requires a metastable coiled coil and a positively charged N-terminus in L1ORF1p
Source: eLife journal article supplement (doi:10.7554/elife.34960), 2018-03-22
Supplement: supp [file elife-34960-supp-v1.zip]

Archive with 21 entries (21 files):
- elife_poa_e34960_Figure_4_source_data_1.xlsx
- elife_poa_e34960_Figure_8_figure_supplement_1.pdf
- elife_poa_e34960_Figure_1_figure_supplement_1.pdf
- elife_poa_e34960_Figure_1_source_data_1.xlsx
- elife_poa_e34960_Figure_8_video_1.mov
- elife_poa_e34960_Figure_1_figure_supplement_2.pdf
- elife_poa_e34960_Supplementary_file_2.docx
- elife_poa_e34960_Figure_2_figure_supplement_1.pdf
- elife_poa_e34960_Figure_4_figure_supplement_2.pdf
- elife_poa_e34960_Figure_6_source_data_1.xlsx
- elife_poa_e34960_Figure_4.pdf
- elife_poa_e34960_Figure_4_figure_supplement_1.pdf
- elife_poa_e34960_Figure_6_figure_supplement_1.pdf
- elife_poa_e34960_Figure_7_figure_supplement_1.pdf
- elife_poa_e34960_Figure_3_source_data_1.xlsx
- elife_poa_e34960_Supplementary_file_1.docx
- elife_poa_e34960_Transparent_Reporting_File.docx
- elife_poa_e34960_Supplementary_file_3.docx
- elife_poa_e34960_Figure_3_figure_supplement_1.pdf
- elife_poa_e34960_Figure_5_source_data_1.xlsx
- elife_poa_e34960_Figure_7_source_data_1.xlsx
