# Supplementary material for: Human LINE-1 retrotransposition requires a metastable coiled coil and a positively charged N-terminus in L1ORF1p
Source: eLife journal article supplement (doi:10.7554/elife.34960), 2018-03-22
Supplement: supp [file elife-34960-supp-v1.zip › elife_poa_e34960_Figure_1_figure_supplement_2.pdf]

Homo\_sapiens\_L1.3 1 M GKKQNRKT T GNSKTQ SA S P P P K E R S S S P A T E Q S W M E N D F D E L R E E G F R R S N 51  
L1PA1 1 M GKKQNRKT T GNSKTQ SA S P P P K E R S S S P A T E Q S W M E N D F D E L R E E G F R R S N 51  
Pan\_troglodytes 1 M GKKQNRKT T GNSKTQ SA S P P P K E R S S S P A T E Q S W M E N D F D E L R E E G F R R S N 51  
L1PA2 1 M GKKQNRKT T GNSKKQ SA S P P P K E R S S S P A T E Q S W M E N D F D E L R E E G F R R S N 51  
Pongo\_abelii 1 M GKKQSRKT T GNSKNQ ST S P P P K E R S S S P A T E Q S W T E N D F D E L R E E G F R R S N 51  
L1PA3 1 M GKKQSRKT T GNSKKQ SA S P P P K E R S S S P A T E Q S W M E N D F D E L R E E G F R R S N 51  
Nomascus\_leucogenys 1 M GKKQT KKT T GNSKKQ ST S P P P K E R S S S P A T E Q S W M E D D F D E L R E E G F R R S N 51  
L1PA4 1 M GKKQSRKT T GNSKNQ SA S P P P K E R S S S P A T E Q S W M E N D F D E L R E E G F R R S N 51  
Macaca\_mulatta 1 M GKKQGRK A GNSKNK SA S P A K E R S S S P A T D Q S W T E N D F D E M R E E G F S P S N 51  
Papio\_anubis 1 M GKKQGRK A GNSKNK SA S P A K E R S S S P A T D Q S W T E N D F D E M R E E G F S P S N 51  
Colobus\_guereza 1 M GKKQGRK A GNSKNK SA S P A K E R S S S P A T D Q S W S E N D F D E K R E E G F S P S N 51  
L1PA5 1 M GKKQSRK A E N S K N Q S A S P P P K E R S S S P A T E Q S W M E N D F D E L R E E G F R R S N 51

\*\*

\*\*

\*\*

\*

\*

\*

\*

\*

\*

\*

\*

\*

\*

\*

\*

\*

\*\*

XIV

XIII

XII

XI

X

IX

VIII

o o o o o o o

o o o o o o o

o o o o o o o

o o o o o o o

o o o o o o o

o o o o o o o

o o o o o o o

a b c d e f g

a b c d e f g

a b c d e f g

a b c d e f g

a b c d e f g

a b c d e f' d' e f g

a b c d e f g

Homo\_sapiens\_L1.3 52 Y S E L R E D I Q T K G K E V E N F E K N L E E C I T I T N T E K C L K E L M E L K T K A R E L R E E 103  
L1PA1 52 Y S E L R E D I Q T K G K E V E N F E K N L E E C I T I T N T E K C L K E L M E L K T K A R E L R E E 103  
Pan\_troglodytes 52 Y S E L R E D I Q T K G K E V E N F E K N L E E C I T I T N T E K C L K E L M E L K T K A R E L R E E 103  
L1PA2 52 Y S E L R E D I Q T K G K E V E N F E K N L E E C I T I T N T E K C L K E L M E L K T K A R E L R E E 103  
Pongo\_abelii 52 Y S E L R E D I Q T K G K E V E N F E K N L E E C I T I T N T E K C L K E L M E L K T K A R E L R E E 103  
L1PA3 52 Y S E L Q E E I Q T K G K E V K N F E K N L D E C I T I T N T E K C L K E L M E L K T K A R E L R E E 103  
Nomascus\_leucogenys 52 Y S E L R E E I Q N N S K E V K N F E K K L E E W I T I T N G E K G F K E L M E L K A K F R E L R D E 103  
L1PA4 52 Y S E L K E E V R T N G K E V K N F E K K L D E W L T I T N A E K S L K D L M E L K T K A R E L R D E 103  
Macaca\_mulatta 52 Y S E L K E E L R T Q R K E T K N L E K K V E E L M A R V I N A E K V L N E M K E M K T M T R E I R D K 103  
Papio\_anubis 52 Y S E L K E E L R T Q R K E T K N L E K K V E E L T A R L I N A E K V I N E M K E M K T M T R E I R D K 103  
Colobus\_guereza 52 Y S E L K E E L R T Q R K E T K N L E K R V E E L T A R L I N A E K V I N D M T E M K T M T R E I R D K 103  
L1PA5 52 Y S E L K E E V R T H R K E A K N L E K R L D E W L T I T S V E K S L N D L M E L K T M A R E L R D E 103

\*

\*

\*

\*

\*

\*

\*

\*

\*

\*

\*

\*

\*

\*

\*

\*

\*

\*

\*

\*

\*

VII

VI

V

IV

III

II

I

o o o o o o o

o o o o o o o

o o o o o o o

o o o o o o o

o o o o o o o

o o o o o o o

o o o o o o o

a b c d e f g

a b c d e f g

a b c d e f g

a b c d e f g

a b c d e f g

a b c d e f g

a b c d e f g

Homo\_sapiens\_L1.3 104 C R S L R S R C D Q L E E R V S A M E D E M N E M K R E G K F R E K R I K R N E Q S L Q E I W D Y 152  
L1PA1 104 C R S L R S R C D Q L E E R V S A M E D E M N E M K R E G K F R E K R I K R N E Q S L Q E I W D Y 152  
Pan\_troglodytes 104 C R S L R S R C D Q L E E R V S A M E D E M N E M K R E G K F R E K R I K R N E Q S L Q E I W D Y 152  
L1PA2 104 C R S L R S R C D Q L E E R V S A M E D E M N E M K R E G K F R E K R I K R N E Q S L Q E I W D Y 152  
Pongo\_abelii 104 C R S L R S R C D Q M E E R V S A L E D E M N E M K R E G K F R E K R I K R N E Q S L Q E M W D Y 152  
L1PA3 104 C R S L R S R C D Q L E E R V S M E D E M N E M K R E G K F R E K R I K R N E Q S L Q E I W D Y 152  
Nomascus\_leucogenys 104 C R S L S S R C D Q L E E R V S L M E D E M N E M K R E G K F R E K R I K R N E Q S L Q E I W D Y 152  
L1PA4 104 C T S L S S R C D Q L E E R V S M E D E M N E M K R E E K F R E K R I K R N E Q S L Q E I W D Y 152  
Macaca\_mulatta 104 C T S F S N R L D Q L E E R V S A I E D Q M N E M K R E E K P K E K R R K R N E Q S L Q E V W D Y 152  
Papio\_anubis 104 C T S F S N R L D Q L E E R V S A I E D Q M N E M K R E E K P K E K R R K R N E Q S L Q E V W D Y 152  
Colobus\_guereza 104 C T S F S N R L D Q L E E R V S A I E D Q M N E M K R E E K P K E K R R K R N E Q S L Q E V W D Y 152  
L1PA5 104 C T S F S S R F D Q L E E R V S V I E D Q M N E M K R E E K F R E K R I K R N E Q S L Q E I W D Y 152

\*

\*

\*

\*

\*

\*

\*

\*

\*

\*

\*

\*

\*

\*

\*

\*

\*

\*

\*

\*

\*

\*
