# Supplementary material for: Human LINE-1 retrotransposition requires a metastable coiled coil and a positively charged N-terminus in L1ORF1p
Source: eLife journal article supplement (doi:10.7554/elife.34960), 2018-03-22
Supplement: supp [file elife-34960-supp-v1.zip › elife_poa_e34960_Figure_1_source_data_1.xlsx]

## Sheet: Figure 1D
Pcoils output					IUpred output
	coiled coil					disorder
sequence position	probability				sequence position	probability
	(28 aa indow)					(long regions)
1	0				1	0.853
2	0				2	0.8343
3	0				3	0.8421
4	0				4	0.853
5	0				5	0.853
6	0				6	0.8462
7	0				7	0.8462
8	0				8	0.8741
9	0				9	0.8991
10	0				10	0.9168
11	0				11	0.9081
12	0				12	0.9106
13	0				13	0.9013
14	0				14	0.9081
15	0				15	0.9151
16	0				16	0.9106
17	0				17	0.9249
18	0				18	0.9249
19	0				19	0.9329
20	0				20	0.9308
21	0				21	0.9329
22	0				22	0.9287
23	0				23	0.8792
24	0				24	0.8872
25	0				25	0.8872
26	0				26	0.8872
27	0				27	0.8894
28	0				28	0.8462
29	0				29	0.8493
30	0				30	0.8162
31	0				31	0.7369
32	0				32	0.6906
33	0				33	0.7036
34	0				34	0.6991
35	0.002				35	0.7163
36	0.002				36	0.6322
37	0.002				37	0.6183
38	0.002				38	0.6089
39	0.007				39	0.5665
40	0.042				40	0.5901
41	0.053				41	0.5139
42	0.053				42	0.5139
43	0.159				43	0.5055
44	0.159				44	0.4582
45	0.159				45	0.5342
46	0.739				46	0.5296
47	0.946				47	0.5342
48	0.991				48	0.4766
49	1				49	0.4801
50	1				50	0.5533
51	1				51	0.5419
52	1				52	0.5493
53	1				53	0.5901
54	1				54	0.6043
55	1				55	0.5493
56	1				56	0.5533
57	1				57	0.5577
58	1				58	0.5493
59	1				59	0.562
60	1				60	0.562
61	1				61	0.5707
62	1				62	0.5098
63	1				63	0.5807
64	1				64	0.5807
65	1				65	0.4901
66	1				66	0.4901
67	1				67	0.5055
68	1				68	0.494
69	1				69	0.4409
70	1				70	0.4901
71	1				71	0.494
72	1				72	0.494
73	1				73	0.5017
74	1				74	0.4901
75	1				75	0.422
76	1				76	0.374
77	1				77	0.4017
78	1				78	0.4051
79	1				79	0.3494
80	1				80	0.4119
81	1				81	0.4149
82	1				82	0.374
83	1				83	0.3566
84	1				84	0.4087
85	1				85	0.4017
86	1				86	0.391
87	1				87	0.4541
88	1				88	0.5098
89	1				89	0.4507
90	1				90	0.4507
91	1				91	0.5055
92	1				92	0.5017
93	1				93	0.4186
94	1				94	0.4017
95	1				95	0.4017
96	1				96	0.3599
97	1				97	0.422
98	1				98	0.4725
99	1				99	0.4685
100	1				100	0.391
101	1				101	0.4476
102	1				102	0.4582
103	1				103	0.4017
104	1				104	0.4541
105	1				105	0.4652
106	1				106	0.4476
107	1				107	0.4119
108	1				108	0.422
109	1				109	0.4186
110	1				110	0.4087
111	1				111	0.4619
112	1				112	0.4766
113	1				113	0.4766
114	1				114	0.4652
115	1				115	0.5577
116	1				116	0.5707
117	1				117	0.5577
118	1				118	0.6136
119	1				119	0.6136
120	1				120	0.6136
121	1				121	0.6322
122	1				122	0.7209
123	1				123	0.6089
124	1				124	0.5901
125	1				125	0.6661
126	1				126	0.6531
127	1				127	0.6322
128	1				128	0.5665
129	1				129	0.6227
130	1				130	0.6089
131	1				131	0.6375
132	0.999				132	0.6482
133	0.999				133	0.6482
134	0.999				134	0.6427
135	0.992				135	0.562
136	0.992				136	0.5758
137	0.992				137	0.562
138	0.992				138	0.4901
139	0.992				139	0.4051
140	0.992				140	0.4186
141	0.99				141	0.3667
142	0.851				142	0.3149
143	0.851				143	0.3087
144	0.851				144	0.3087
145	0.851				145	0.4119
146	0.851				146	0.4292
147	0.851				147	0.3704
148	0.851				148	0.3704
149	0.805				149	0.3215
150	0.162				150	0.3182
151	0.161				151	0.3249
152	0.031				152	0.2849
153	0.023				153	0.3019
154	0.023				154	0.3019
155	0.017				155	0.3019
156	0.002				156	0.3019
157	0.002				157	0.3087
158	0.002				158	0.3053
159	0.002				159	0.3149
160	0.002				160	0.3774
161	0.002				161	0.4801
162	0.002				162	0.4725
163	0.002				163	0.4685
164	0				164	0.5211
165	0				165	0.5419
166	0				166	0.5577
167	0				167	0.4541
168	0				168	0.4476
169	0				169	0.5139
170	0				170	0.4507
171	0				171	0.4476
172	0				172	0.5176
173	0.001				173	0.5139
174	0.001				174	0.5901
175	0.004				175	0.4619
176	0.004				176	0.4901
177	0.004				177	0.5055
178	0.004				178	0.433
179	0.004				179	0.4685
180	0.017				180	0.4619
181	0.017				181	0.4582
182	0.018				182	0.4369
183	0.018				183	0.4409
184	0.018				184	0.3872
185	0.018				185	0.4582
186	0.018				186	0.391
187	0.018				187	0.384
188	0.018				188	0.3807
189	0.018				189	0.3774
190	0.018				190	0.3774
191	0.018				191	0.3704
192	0.018				192	0.4441
193	0.018				193	0.5419
194	0.018				194	0.5419
195	0.018				195	0.5382
196	0.018				196	0.4476
197	0.018				197	0.5382
198	0.018				198	0.5055
199	0.018				199	0.4864
200	0.018				200	0.5577
201	0.018				201	0.5533
202	0.018				202	0.5707
203	0.018				203	0.5992
204	0.018				204	0.6183
205	0.018				205	0.6183
206	0.018				206	0.5951
207	0.018				207	0.5017
208	0.018				208	0.5098
209	0.018				209	0.5017
210	0.005				210	0.4087
211	0.005				211	0.4831
212	0.003				212	0.4766
213	0.002				213	0.4186
214	0.002				214	0.4149
215	0.002				215	0.3631
216	0.002				216	0.3566
217	0.002				217	0.3631
218	0.002				218	0.4369
219	0.002				219	0.4119
220	0.002				220	0.3392
221	0.002				221	0.3426
222	0.002				222	0.3249
223	0.002				223	0.3215
224	0.002				224	0.3149
225	0.002				225	0.2918
226	0.002				226	0.2951
227	0.002				227	0.2884
228	0.002				228	0.3566
229	0.002				229	0.3667
230	0.002				230	0.433
231	0.002				231	0.3631
232	0.002				232	0.4507
233	0.002				233	0.4476
234	0.002				234	0.4476
235	0.002				235	0.5456
236	0.002				236	0.4582
237	0.002				237	0.4831
238	0.001				238	0.4051
239	0.001				239	0.4119
240	0.001				240	0.3494
241	0.001				241	0.3774
242	0.001				242	0.3774
243	0.001				243	0.3807
244	0.001				244	0.3807
245	0.001				245	0.4051
246	0.001				246	0.4119
247	0.001				247	0.3356
248	0.001				248	0.3426
249	0.001				249	0.3182
250	0.001				250	0.3182
251	0.001				251	0.3807
252	0.001				252	0.3807
253	0.001				253	0.3529
254	0.001				254	0.3529
255	0.001				255	0.3774
256	0.001				256	0.3019
257	0.001				257	0.1914
258	0.001				258	0.2817
259	0.001				259	0.2064
260	0.001				260	0.2064
261	0.001				261	0.2034
262	0.001				262	0.2715
263	0.001				263	0.268
264	0.001				264	0.3529
265	0.001				265	0.2575
266	0.001				266	0.2884
267	0.001				267	0.3117
268	0.001				268	0.3087
269	0.001				269	0.3019
270	0.001				270	0.2951
271	0.001				271	0.2399
272	0.001				272	0.2645
273	0.001				273	0.2399
274	0.001				274	0.2364
275	0.001				275	0.268
276	0				276	0.268
277	0				277	0.1554
278	0				278	0.1554
279	0				279	0.2364
280	0				280	0.2224
281	0				281	0.2988
282	0				282	0.3704
283	0				283	0.2918
284	0				284	0.2884
285	0				285	0.2094
286	0				286	0.1251
287	0				287	0.1373
288	0				288	0.1323
289	0				289	0.1184
290	0				290	0.1229
291	0				291	0.1583
292	0				292	0.107
293	0.004				293	0.1671
294	0.004				294	0.1449
295	0.004				295	0.0967
296	0.004				296	0.0662
297	0.004				297	0.107
298	0.004				298	0.1092
299	0.005				299	0.1823
300	0.034				300	0.2783
301	0.034				301	0.2503
302	0.034				302	0.1791
303	0.034				303	0.1791
304	0.034				304	0.1823
305	0.034				305	0.1823
306	0.034				306	0.1229
307	0.034				307	0.1852
308	0.034				308	0.2752
309	0.034				309	0.3215
310	0.034				310	0.2503
311	0.034				311	0.2609
312	0.034				312	0.2193
313	0.034				313	0.2503
314	0.034				314	0.3249
315	0.034				315	0.3356
316	0.034				316	0.3494
317	0.034				317	0.4507
318	0.034				318	0.422
319	0.034				319	0.4256
320	0.034				320	0.4476
321	0.034				321	0.3704
322	0.034				322	0.3529
323	0.034				323	0.3948
324	0.034				324	0.4766
325	0.034				325	0.4476
326	0.034				326	0.4409
327	0.034				327	0.4901
328	0.028				328	0.5665
329	0.005				329	0.5533
330	0.003				330	0.5342
331	0.002				331	0.5533
332	0.002				332	0.6531
333	0.002				333	0.6136
334	0.002				334	0.6531
335	0.002				335	0.6269
336	0.002				336	0.6043
337	0.002				337	0.5493
338	0.001				338	0.494
