# Supplementary material for: Human LINE-1 retrotransposition requires a metastable coiled coil and a positively charged N-terminus in L1ORF1p
Source: eLife journal article supplement (doi:10.7554/elife.34960), 2018-03-22
Supplement: supp [file elife-34960-supp-v1.zip › elife_poa_e34960_Figure_3_source_data_1.xlsx]

## Sheet: Figure 3
Figure 3B						Figure 3C
TWISTER output						B-factors
						(main chain avg)
	a-helix	coiled coil	a-helix
sequence position	rotation ABC	rotation ABC	periodicity ABC			sequence position	chain A	chain B	chain C		average ABC
	(degree)	(degree)					(A^2)	(A^2)	(A^2)		(A^2)
69	99.27	-2.72	3.53			69	64.905	94.725	100.237		86.6225
70	99.86	-2.72	3.511			70	61.34	89.8	107.315		86.1517
71	99.11	-2.53	3.537			71	57.255	97.8375	105.435		86.8425
72	99.5	-2.64	3.523			72	60.3625	94.6725	91.6325		82.2225
73	100.8	-3.02	3.463			73	62.7275	85.66	88.9325		79.1067
74	101.34	-3.34	3.433			74	61.635	90.1025	96.0575		82.5983
75	100.51	-3.6	3.451			75	65.3425	93.5875	92.19		83.7067
76	98.36	-3.54	3.528			76	67.7475	84.75	86.0875		79.5283
77	98.5	-3.27	3.538			77	64.995	82.845	88.7275		78.8558
78	98.82	-3.21	3.521			78	62.6225	87.1975	89.0925		79.6375
79	98.02	-3.3	3.546			79	62.3725	84.365	80.6475		75.795
80	98.76	-3.72	3.512			80	66.6925	83.315	83.755		77.9208
81	99.78	-4	3.465			81	73.61	91.4275	97.615		87.5508
82	99.49	-3.85	3.479			82	76.415	98.105	100.26		91.5933
83	99.95	-4.2	3.448			83	78.7375	92.2675	95.73		88.9117
84	101.55	-4.7	3.385			84	87.095	92.7575	103.847		94.5667
85	99.82	-4.64	3.442			85	100.12	104.775	115.727		106.874
86	98.25	-4.69	3.485			86	107.37	111.373	113.608		110.783
87	101.04	-4.46	3.403			87	108.873	108.028	111.572		109.491
88	101.32	-4.05	3.408			88	112.537	112.355	116.675		113.856
89	98.59	-3.83	3.508			89	111.35	113.9	114.007		113.086
90	104.74	-5.79	3.249			90	106.695	109.428	105.058		107.06
91	109.94	-7.89	3.035			91	112.05	109.825	116.075		112.65
92	108	-7.97	3.084			92	90.7775	93.155	91.235		91.7225
93	107.52	-6.93	3.134			93	88.525	85.6875	82.6075		85.6067
94	101.53	-4.33	3.398			94	90.0675	85.875	80.8175		85.5867
95	98.1	-3.28	3.547			95	84.9025	84.3475	77.72		82.3233
96	100.43	-3.48	3.456			96	72.5575	75.6025	71.235		73.1317
97	100.94	-3.39	3.45			97	69.7275	73.42	66.055		69.7342
98	100.47	-3.46	3.456			98	73.985	77.4525	65.6275		72.355
99	99.28	-3.44	3.504			99	73.4125	69.91	65.515		69.6125
100	100.83	-3.5	3.446			100	66.905	64.7425	62.5725		64.74
101	100.27	-3.21	3.475			101	69.495	68.12	67.17		68.2617
102	100.35	-3.01	3.482			102	68.8075	69.41	67.05		68.4225
103	100.55	-2.95	3.474			103	63.6925	66.46	61.31		63.8208
104	100.15	-2.95	3.484			104	63.9475	63.68	57.2675		61.6317
105	100.3	-3.17	3.476			105	66.22	67.0725	56.815		63.3692
106	98.53	-3.09	3.535			106	62.3425	64.115	57.0025		61.1533
107	99.78	-3.27	3.491			107	55.145	55.7175	50.83		53.8975
108	99.78	-3.2	3.494			108	55.8975	59.415	53.1275		56.1467
109	100.55	-3.09	3.47			109	56.94	62.4275	57.885		59.0842
110	100.44	-3.11	3.469			110	54.695	56.595	54.965		55.4183
111	100.52	-3.16	3.467			111	56.6	58.63	55.755		56.995
112	99.64	-3.27	3.491			112	56.9075	64.645	57.345		59.6325
113	97.41	-3.28	3.575			113	59.255	63.7025	54.955		59.3042
114	99.09	-3.4	3.505			114	49.8175	58.2175	50.825		52.9533
115	99.51	-3.22	3.502			115	47.49	60.375	51.4975		53.1208
116	97.94	-3.18	3.56			116	54.0725	62.1125	52.045		56.0767
117	97.05	-3.45	3.578			117	50.31	55.4225	49.9275		51.8867
118	98.67	-3.71	3.512			118	47.3725	52.8075	49.77		49.9833
119	99.6	-3.79	3.472			119	52.27	57.1475	53.2		54.2058
120	99.46	-3.69	3.485			120	48.385	54.3925	50.84		51.2058
121	100.04	-3.81	3.462			121	45.4975	50.6	52.5225		49.54
122	99.94	-3.85	3.461			122	45.4125	52.2775	52.5175		50.0692
123	99.36	-3.71	3.484			123	47.145	57.77	54.0675		52.9942
124	99.42	-3.67	3.486			124	49.845	55.0625	53.09		52.6658
125	99.71	-3.55	3.481			125	50.1675	51.44	55.0525		52.22
126	98.54	-3.32	3.527			126	51.9275	57.0125	59.7775		56.2392
127	99.04	-3.23	3.511			127	49.545	58.125	58.8475		55.5058
128	100.15	-3.12	3.478			128	46.82	51.475	50.335		49.5433
129	98.65	-2.9	3.542			129	47.1075	49.83	57.0025		51.3133
130	98.36	-2.74	3.558			130	47.1	56.2175	65.8825		56.4
131	99.47	-2.77	3.519			131	51.1525	61.2175	66.91		59.76
132	100.89	-2.91	3.467			132	48.8525	56.63	62.29		55.9242
133	99.58	-2.84	3.516			133	51.35	57.6475	65.8125		58.27
134	98.02	-2.74	3.567			134	49.875	60.335	68.35		59.52
135	100.92	-3.11	3.459			135	53.2775	61.3025	63.7025		59.4275
136	103.41	-3.54	3.361			136	55.79	56.7775	60.925		57.8308
137	100.3	-3.87	3.451			137	54.675	55.8625	65.9975		58.845
138	97.92	-4.43	3.513			138	48.4725	51.6375	60.9525		53.6875
139	99.55	-4.67	3.45			139	50.145	48.8325	59.3175		52.765
140	100.43	-4.59	3.416			140	58.135	51.7625	64.165		58.0208
141	100.04	-4.55	3.436			141	54.5775	52.655	66.915		58.0492
142	99.97	-4.52	3.437			142	52.7325	48.8075	59.6775		53.7392
143	99.67	-4.31	3.454			143	58.335	47.89	62.89		56.3717
144	99.49	-4.12	3.47			144	62.2075	51.8375	75.575		63.2067
145	99.16	-3.97	3.484			145	60.5625	52.7475	74.26		62.5233

## Sheet: Figure 3 FS 1
Figure 3 FS 1B						Figure 3 FS 1C
TWISTER output						B-factors
						(main chain avg)
	a-helix	coiled coil	a-helix
sequence position	rotation DEF	rotation DEF	periodicity DEF			sequence position	chain D	chain E	chain F		average DEF
	(degree)	(degree)					(A^2)	(A^2)	(A^2)		(A^2)
69	100.07	-3.48	3.474			69	118.7	146.105	144.145		136.317
70	100.22	-3.32	3.471			70	110.358	144.048	141.257		131.888
71	98.58	-3.07	3.536			71	103.953	143.822	137.312		128.362
72	99.56	-3.2	3.503			72	101.093	138.105	127.4		122.199
73	100.68	-3.4	3.458			73	96.3125	131.455	125.845		117.871
74	101.12	-3.65	3.431			74	91.115	129.787	127.965		116.289
75	100.71	-3.84	3.434			75	86.6125	125.86	121.335		111.269
76	98.93	-3.58	3.508			76	86.215	115.353	113.215		104.928
77	98.31	-3.25	3.539			77	80.9875	109.5	111.27		100.586
78	98.23	-3.27	3.547			78	80.4375	111.427	109.1		100.322
79	97.66	-3.37	3.562			79	81.7	105.757	100.507		95.9883
80	98.35	-3.7	3.522			80	85.445	101.523	103.162		96.71
81	99.18	-3.87	3.488			81	90.11	105.935	119.535		105.193
82	99.47	-3.64	3.487			82	95.515	113.84	122.057		110.471
83	100.33	-3.94	3.448			83	98.215	110.053	115.912		108.06
84	101.91	-4.43	3.376			84	101.395	106.248	120.385		109.343
85	100.25	-4.4	3.432			85	108.923	115.272	132.96		119.052
86	98.57	-4.49	3.483			86	118.593	119.248	132.308		123.383
87	101.18	-4.29	3.408			87	123.185	117.252	127.77		122.736
88	101.53	-3.93	3.412			88	127.072	120.567	133.782		127.141
89	98.78	-3.73	3.502			89	128.6	127.852	138.525		131.659
90	104.91	-5.7	3.243			90	130.602	126.22	136.33		131.051
91	110.01	-7.82	3.037			91	137.86	123.665	141.875		134.467
92	107.81	-7.96	3.093			92	124.172	122.647	121.093		122.638
93	107.28	-7.01	3.14			93	113.55	114.828	117.948		115.442
94	101.36	-4.46	3.393			94	109.16	115.675	116.895		113.91
95	97.93	-3.42	3.551			95	107.903	114.305	107.18		109.796
96	100.23	-3.69	3.457			96	100.318	106.763	97.8775		101.652
97	100.56	-3.53	3.454			97	96.1575	105.035	94.8975		98.6967
98	100.66	-3.53	3.454			98	93.9475	107.328	95.4875		98.9208
99	99.68	-3.46	3.484			99	92.565	99.5325	89.4575		93.8517
100	100.79	-3.49	3.446			100	88.0325	90.0075	83.6425		87.2275
101	100.06	-3.24	3.483			101	84.4425	91.1925	88.1625		87.9325
102	100.3	-3.06	3.48			102	81.365	86.9775	88.43		85.5908
103	100.51	-3	3.473			103	80.8025	81.1275	81.895		81.275
104	99.95	-3.02	3.491			104	79.6625	80.0625	81.7625		80.4958
105	100.51	-3.26	3.463			105	78.305	84.1625	82.9875		81.8183
106	98.57	-3.16	3.533			106	74.11	83.78	76.7175		78.2025
107	99.67	-3.4	3.486			107	64.855	74.715	73.845		71.1383
108	99.4	-3.31	3.499			108	64.1175	75.5625	74.4		71.36
109	100.23	-3.17	3.476			109	65.42	76.79	74.9		72.37
110	100.55	-3.21	3.465			110	62.675	68.02	68.18		66.2917
111	100.44	-3.29	3.462			111	63.5025	65.9775	68.91		66.13
112	99.54	-3.42	3.495			112	63.48	69.685	69.8125		67.6592
113	97.42	-3.41	3.57			113	61.025	65.92	65.68		64.2083
114	99.12	-3.54	3.5			114	58.0925	59.685	57.9125		58.5633
115	99.26	-3.32	3.508			115	56.7875	60.4575	60.8675		59.3708
116	97.8	-3.28	3.556			116	57.83	63.0575	61.3525		60.7467
117	97.21	-3.57	3.564			117	51.805	55.805	56.235		54.615
118	98.64	-3.83	3.508			118	51.5075	50.68	58.405		53.5308
119	99.34	-3.89	3.478			119	50.145	50.8425	58.325		53.1042
120	99.24	-3.78	3.491			120	48.0025	48.305	50.8525		49.0533
121	99.96	-3.89	3.46			121	49.985	48.67	51.945		50.2
122	99.85	-3.92	3.468			122	50.555	48.4	53.6475		50.8675
123	99.31	-3.79	3.482			123	49.295	52.6075	54.3325		52.0783
124	99.57	-3.76	3.483			124	48.4975	55.0175	50.7		51.405
125	99.72	-3.62	3.479			125	45.27	49.2025	49.665		48.0458
126	98.48	-3.4	3.533			126	46.4625	49.445	55.01		50.3058
127	98.81	-3.36	3.516			127	45.6575	49.68	52.865		49.4008
128	99.81	-3.25	3.492			128	44.81	44.8975	49.6075		46.4383
129	98.53	-3.03	3.537			129	48.4025	44.96	51.7325		48.365
130	97.78	-2.81	3.574			130	53.9625	47.32	56.1175		52.4667
131	98.96	-2.82	3.536			131	54.3525	52.92	55.6525		54.3083
132	101.26	-2.94	3.456			132	55.4925	49.8375	52.4825		52.6042
133	99.42	-2.71	3.521			133	55.245	50.71	52.3925		52.7825
134	97.78	-2.6	3.582			134	55.5325	54.3175	53.8475		54.5658
135	100.99	-2.88	3.468			135	56.015	54.8925	55.3475		55.4183
136	103.43	-3.3	3.369			136	56.3775	50.1275	54.3375		53.6142
137	100.94	-3.77	3.436			137	54.445	52.19	55.9225		54.1858
138	98.24	-4.23	3.502			138	51.175	50.0975	53.83		51.7008
139	99.72	-4.35	3.452			139	50.72	48.9575	50.0575		49.9117
140	100.45	-4.24	3.429			140	56.9075	49.685	53.545		53.3792
141	100.02	-4.18	3.449			141	55.205	51.68	56.88		54.5883
142	100.57	-4.16	3.431			142	51.995	49.77	55.1525		52.3058
143	99.94	-3.99	3.456			143	60.03	52.6175	57.2625		56.6367
144	99.3	-3.79	3.491			144	65.64	56.845	61.465		61.3167
145	99.59	-3.64	3.478			145	62.65	55.345	60.17		59.3883
