# Supplementary material for: Human LINE-1 retrotransposition requires a metastable coiled coil and a positively charged N-terminus in L1ORF1p
Source: eLife journal article supplement (doi:10.7554/elife.34960), 2018-03-22
Supplement: supp [file elife-34960-supp-v1.zip › elife_poa_e34960_Figure_4_source_data_1.xlsx]

## Sheet: Figure 4A
hL1ORF1p-cc			wavelength	MRE
			(nm)	(deg/(cm*M))
MW (kDa)	12.5731		240	-21.657
Concentration (mM)	0.0119302		239.9	-22.0342
Peptide bonds	103		239.8	-22.477
			239.7	-22.984
			239.6	-23.5548
			239.5	-24.1885
			239.4	-24.8794
			239.3	-25.6248
			239.2	-26.4169
			239.1	-27.243
			239	-28.0855
			238.9	-28.9283
			238.8	-29.7582
			238.7	-30.5652
			238.6	-31.3816
			238.5	-32.2144
			238.4	-33.0697
			238.3	-33.9386
			238.2	-34.8268
			238.1	-35.748
			238	-36.6961
			237.9	-37.6752
			237.8	-38.6791
			237.7	-39.6981
			237.6	-40.7405
			237.5	-41.8036
			237.4	-42.8816
			237.3	-43.9811
			237.2	-45.1051
			237.1	-46.2534
			237	-47.421
			236.9	-48.6092
			236.8	-49.8136
			236.7	-51.0333
			236.6	-52.2673
			236.5	-53.5181
			236.4	-54.7907
			236.3	-56.0892
			236.2	-57.4128
			236.1	-58.7646
			236	-60.1456
			235.9	-61.5503
			235.8	-62.9845
			235.7	-64.4548
			235.6	-65.9621
			235.5	-67.5022
			235.4	-69.0657
			235.3	-70.6522
			235.2	-72.2698
			235.1	-73.9047
			235	-75.5521
			234.9	-77.2199
			234.8	-78.9007
			234.7	-80.5893
			234.6	-82.2859
			234.5	-83.9924
			234.4	-85.7176
			234.3	-87.4632
			234.2	-89.2267
			234.1	-91.0048
			234	-92.8025
			233.9	-94.6164
			233.8	-96.4532
			233.7	-98.3184
			233.6	-100.209
			233.5	-102.122
			233.4	-104.053
			233.3	-106.005
			233.2	-107.987
			233.1	-110
			233	-112.032
			232.9	-114.088
			232.8	-116.165
			232.7	-118.252
			232.6	-120.358
			232.5	-122.481
			232.4	-124.61
			232.3	-126.754
			232.2	-128.912
			232.1	-131.088
			232	-133.292
			231.9	-135.516
			231.8	-137.764
			231.7	-140.038
			231.6	-142.349
			231.5	-144.686
			231.4	-147.06
			231.3	-149.472
			231.2	-151.908
			231.1	-154.359
			231	-156.813
			230.9	-159.28
			230.8	-161.769
			230.7	-164.272
			230.6	-166.78
			230.5	-169.286
			230.4	-171.791
			230.3	-174.293
			230.2	-176.791
			230.1	-179.276
			230	-181.755
			229.9	-184.228
			229.8	-186.688
			229.7	-189.147
			229.6	-191.601
			229.5	-194.05
			229.4	-196.49
			229.3	-198.92
			229.2	-201.343
			229.1	-203.764
			229	-206.183
			228.9	-208.599
			228.8	-211.01
			228.7	-213.405
			228.6	-215.788
			228.5	-218.158
			228.4	-220.516
			228.3	-222.846
			228.2	-225.151
			228.1	-227.426
			228	-229.669
			227.9	-231.889
			227.8	-234.095
			227.7	-236.29
			227.6	-238.466
			227.5	-240.617
			227.4	-242.745
			227.3	-244.852
			227.2	-246.929
			227.1	-248.981
			227	-251.004
			226.9	-252.994
			226.8	-254.96
			226.7	-256.909
			226.6	-258.824
			226.5	-260.704
			226.4	-262.546
			226.3	-264.339
			226.2	-266.078
			226.1	-267.765
			226	-269.416
			225.9	-271.033
			225.8	-272.621
			225.7	-274.171
			225.6	-275.689
			225.5	-277.181
			225.4	-278.647
			225.3	-280.075
			225.2	-281.455
			225.1	-282.793
			225	-284.091
			224.9	-285.339
			224.8	-286.535
			224.7	-287.678
			224.6	-288.77
			224.5	-289.806
			224.4	-290.8
			224.3	-291.767
			224.2	-292.696
			224.1	-293.593
			224	-294.462
			223.9	-295.314
			223.8	-296.151
			223.7	-296.973
			223.6	-297.796
			223.5	-298.621
			223.4	-299.43
			223.3	-300.224
			223.2	-300.999
			223.1	-301.748
			223	-302.471
			222.9	-303.164
			222.8	-303.824
			222.7	-304.437
			222.6	-304.987
			222.5	-305.473
			222.4	-305.902
			222.3	-306.275
			222.2	-306.602
			222.1	-306.889
			222	-307.142
			221.9	-307.373
			221.8	-307.576
			221.7	-307.76
			221.6	-307.934
			221.5	-308.107
			221.4	-308.264
			221.3	-308.399
			221.2	-308.52
			221.1	-308.626
			221	-308.706
			220.9	-308.759
			220.8	-308.779
			220.7	-308.768
			220.6	-308.717
			220.5	-308.622
			220.4	-308.482
			220.3	-308.294
			220.2	-308.062
			220.1	-307.797
			220	-307.492
			219.9	-307.159
			219.8	-306.808
			219.7	-306.439
			219.6	-306.061
			219.5	-305.682
			219.4	-305.311
			219.3	-304.957
			219.2	-304.615
			219.1	-304.28
			219	-303.944
			218.9	-303.61
			218.8	-303.285
			218.7	-302.982
			218.6	-302.677
			218.5	-302.366
			218.4	-302.044
			218.3	-301.693
			218.2	-301.297
			218.1	-300.873
			218	-300.43
			217.9	-299.957
			217.8	-299.435
			217.7	-298.857
			217.6	-298.237
			217.5	-297.593
			217.4	-296.922
			217.3	-296.23
			217.2	-295.52
			217.1	-294.79
			217	-294.05
			216.9	-293.293
			216.8	-292.515
			216.7	-291.736
			216.6	-290.961
			216.5	-290.203
			216.4	-289.47
			216.3	-288.761
			216.2	-288.057
			216.1	-287.364
			216	-286.666
			215.9	-285.979
			215.8	-285.3
			215.7	-284.634
			215.6	-283.97
			215.5	-283.285
			215.4	-282.561
			215.3	-281.828
			215.2	-281.107
			215.1	-280.396
			215	-279.692
			214.9	-279.009
			214.8	-278.342
			214.7	-277.692
			214.6	-277.066
			214.5	-276.469
			214.4	-275.929
			214.3	-275.441
			214.2	-274.999
			214.1	-274.605
			214	-274.234
			213.9	-273.893
			213.8	-273.59
			213.7	-273.303
			213.6	-273.028
			213.5	-272.787
			213.4	-272.564
			213.3	-272.366
			213.2	-272.174
			213.1	-271.99
			213	-271.808
			212.9	-271.626
			212.8	-271.452
			212.7	-271.293
			212.6	-271.143
			212.5	-271.006
			212.4	-270.881
			212.3	-270.768
			212.2	-270.689
			212.1	-270.659
			212	-270.664
			211.9	-270.683
			211.8	-270.727
			211.7	-270.797
			211.6	-270.878
			211.5	-270.989
			211.4	-271.129
			211.3	-271.302
			211.2	-271.542
			211.1	-271.863
			211	-272.255
			210.9	-272.708
			210.8	-273.189
			210.7	-273.7
			210.6	-274.211
			210.5	-274.711
			210.4	-275.216
			210.3	-275.723
			210.2	-276.224
			210.1	-276.721
			210	-277.196
			209.9	-277.633
			209.8	-278.01
			209.7	-278.317
			209.6	-278.558
			209.5	-278.745
			209.4	-278.873
			209.3	-278.947
			209.2	-278.972
			209.1	-278.975
			209	-278.99
			208.9	-279.017
			208.8	-279.037
			208.7	-279.049
			208.6	-279.06
			208.5	-279.045
			208.4	-279
			208.3	-278.93
			208.2	-278.822
			208.1	-278.661
			208	-278.458
			207.9	-278.216
			207.8	-277.883
			207.7	-277.433
			207.6	-276.841
			207.5	-276.075
			207.4	-275.163
			207.3	-274.142
			207.2	-273.038
			207.1	-271.843
			207	-270.565
			206.9	-269.222
			206.8	-267.796
			206.7	-266.298
			206.6	-264.746
			206.5	-263.12
			206.4	-261.438
			206.3	-259.71
			206.2	-257.945
			206.1	-256.118
			206	-254.255
			205.9	-252.319
			205.8	-250.277
			205.7	-248.119
			205.6	-245.85
			205.5	-243.475
			205.4	-240.965
			205.3	-238.309
			205.2	-235.467
			205.1	-232.431
			205	-229.249
			204.9	-225.894
			204.8	-222.399
			204.7	-218.752
			204.6	-214.911
			204.5	-210.876
			204.4	-206.655
			204.3	-202.286
			204.2	-197.822
			204.1	-193.298
			204	-188.751
			203.9	-184.171
			203.8	-179.615
			203.7	-175.047
			203.6	-170.478
			203.5	-165.835
			203.4	-161.064
			203.3	-156.232
			203.2	-151.417
			203.1	-146.569
			203	-141.684
			202.9	-136.769
			202.8	-131.851
			202.7	-126.919
			202.6	-121.987
			202.5	-117.093
			202.4	-112.276
			202.3	-107.39
			202.2	-102.311
			202.1	-97.0538
			202	-91.5371
			201.9	-85.9007
			201.8	-80.2306
			201.7	-74.4493
			201.6	-68.5372
			201.5	-62.1831
			201.4	-55.3186
			201.3	-48.0177
			201.2	-40.3605
			201.1	-32.3464
			201	-24.2588
			200.9	-16.1898
			200.8	-7.90994
			200.7	0.602246
			200.6	9.42055
			200.5	18.7145
			200.4	28.2753
			200.3	38.0713
			200.2	48.0097
			200.1	58.3236
			200	69.215

## Sheet: Figure 4B
hL1ORF1p-NTR(H6)			wavelength	MRE
			(nm)	(deg/(cm*M))
MW (kDa)	6.6661		240	-4.45861
Concentration (mM)	0.0225019		239.9	-4.48656
Peptide bonds	56		239.8	-4.52639
			239.7	-4.57594
			239.6	-4.63343
			239.5	-4.70547
			239.4	-4.79483
			239.3	-4.89523
			239.2	-5.0071
			239.1	-5.12545
			239	-5.24997
			238.9	-5.37441
			238.8	-5.49534
			238.7	-5.61437
			238.6	-5.71601
			238.5	-5.80787
			238.4	-5.89713
			238.3	-5.99728
			238.2	-6.10351
			238.1	-6.21319
			238	-6.32118
			237.9	-6.42367
			237.8	-6.51155
			237.7	-6.60234
			237.6	-6.70558
			237.5	-6.82349
			237.4	-6.95271
			237.3	-7.08691
			237.2	-7.22814
			237.1	-7.37333
			237	-7.51313
			236.9	-7.64387
			236.8	-7.76268
			236.7	-7.87043
			236.6	-7.97162
			236.5	-8.06725
			236.4	-8.16375
			236.3	-8.26374
			236.2	-8.35953
			236.1	-8.45071
			236	-8.54269
			235.9	-8.64054
			235.8	-8.73934
			235.7	-8.83385
			235.6	-8.92956
			235.5	-9.02455
			235.4	-9.12565
			235.3	-9.24683
			235.2	-9.38103
			235.1	-9.52062
			235	-9.66402
			234.9	-9.80242
			234.8	-9.94035
			234.7	-10.0725
			234.6	-10.1959
			234.5	-10.3221
			234.4	-10.446
			234.3	-10.5705
			234.2	-10.6912
			234.1	-10.8057
			234	-10.9093
			233.9	-11.0003
			233.8	-11.0721
			233.7	-11.1331
			233.6	-11.1997
			233.5	-11.2745
			233.4	-11.3497
			233.3	-11.424
			233.2	-11.4908
			233.1	-11.5457
			233	-11.5904
			232.9	-11.6339
			232.8	-11.676
			232.7	-11.7265
			232.6	-11.7839
			232.5	-11.8408
			232.4	-11.897
			232.3	-11.9492
			232.2	-12.003
			232.1	-12.0702
			232	-12.1371
			231.9	-12.2021
			231.8	-12.266
			231.7	-12.3273
			231.6	-12.3922
			231.5	-12.4617
			231.4	-12.5386
			231.3	-12.6377
			231.2	-12.7523
			231.1	-12.8745
			231	-12.9956
			230.9	-13.1131
			230.8	-13.2191
			230.7	-13.3168
			230.6	-13.4086
			230.5	-13.5063
			230.4	-13.6075
			230.3	-13.7083
			230.2	-13.8064
			230.1	-13.9022
			230	-14.0017
			229.9	-14.1142
			229.8	-14.2407
			229.7	-14.3777
			229.6	-14.5174
			229.5	-14.6722
			229.4	-14.8424
			229.3	-15.0236
			229.2	-15.2224
			229.1	-15.4375
			229	-15.6733
			228.9	-15.9194
			228.8	-16.1502
			228.7	-16.3635
			228.6	-16.5561
			228.5	-16.7241
			228.4	-16.8609
			228.3	-16.9618
			228.2	-17.0229
			228.1	-17.0474
			228	-17.0327
			227.9	-16.9946
			227.8	-16.9394
			227.7	-16.8676
			227.6	-16.7916
			227.5	-16.7184
			227.4	-16.644
			227.3	-16.5695
			227.2	-16.4992
			227.1	-16.441
			227	-16.3938
			226.9	-16.3625
			226.8	-16.3492
			226.7	-16.3533
			226.6	-16.3669
			226.5	-16.3766
			226.4	-16.3865
			226.3	-16.4066
			226.2	-16.4325
			226.1	-16.4473
			226	-16.443
			225.9	-16.4253
			225.8	-16.3933
			225.7	-16.3566
			225.6	-16.3204
			225.5	-16.3077
			225.4	-16.3146
			225.3	-16.3345
			225.2	-16.368
			225.1	-16.415
			225	-16.4635
			224.9	-16.5275
			224.8	-16.6163
			224.7	-16.7288
			224.6	-16.8574
			224.5	-17.001
			224.4	-17.1493
			224.3	-17.289
			224.2	-17.4142
			224.1	-17.5336
			224	-17.6574
			223.9	-17.7813
			223.8	-17.8921
			223.7	-17.9798
			223.6	-18.0424
			223.5	-18.0923
			223.4	-18.1323
			223.3	-18.1703
			223.2	-18.2138
			223.1	-18.2634
			223	-18.3034
			222.9	-18.3152
			222.8	-18.3083
			222.7	-18.2971
			222.6	-18.2821
			222.5	-18.2791
			222.4	-18.2785
			222.3	-18.2764
			222.2	-18.2716
			222.1	-18.2656
			222	-18.2575
			221.9	-18.2537
			221.8	-18.2736
			221.7	-18.3256
			221.6	-18.399
			221.5	-18.4913
			221.4	-18.5996
			221.3	-18.7179
			221.2	-18.8441
			221.1	-18.9904
			221	-19.1642
			220.9	-19.3649
			220.8	-19.5808
			220.7	-19.796
			220.6	-20.0058
			220.5	-20.2092
			220.4	-20.4204
			220.3	-20.6391
			220.2	-20.8514
			220.1	-21.036
			220	-21.1942
			219.9	-21.3287
			219.8	-21.4312
			219.7	-21.5135
			219.6	-21.5867
			219.5	-21.6507
			219.4	-21.7125
			219.3	-21.7683
			219.2	-21.8117
			219.1	-21.8555
			219	-21.8935
			218.9	-21.921
			218.8	-21.9442
			218.7	-21.968
			218.6	-22.0111
			218.5	-22.0587
			218.4	-22.1099
			218.3	-22.1675
			218.2	-22.2245
			218.1	-22.2834
			218	-22.3456
			217.9	-22.405
			217.8	-22.4443
			217.7	-22.478
			217.6	-22.5159
			217.5	-22.5609
			217.4	-22.6247
			217.3	-22.7159
			217.2	-22.8217
			217.1	-22.9486
			217	-23.1066
			216.9	-23.301
			216.8	-23.5313
			216.7	-23.7871
			216.6	-24.0582
			216.5	-24.3659
			216.4	-24.7086
			216.3	-25.0883
			216.2	-25.519
			216.1	-25.9718
			216	-26.439
			215.9	-26.901
			215.8	-27.3476
			215.7	-27.7945
			215.6	-28.2369
			215.5	-28.6626
			215.4	-29.0756
			215.3	-29.4804
			215.2	-29.8587
			215.1	-30.2167
			215	-30.5628
			214.9	-30.8909
			214.8	-31.2017
			214.7	-31.5065
			214.6	-31.7987
			214.5	-32.1027
			214.4	-32.4139
			214.3	-32.7256
			214.2	-33.0587
			214.1	-33.418
			214	-33.7993
			213.9	-34.2142
			213.8	-34.6508
			213.7	-35.0813
			213.6	-35.4967
			213.5	-35.8935
			213.4	-36.2876
			213.3	-36.6858
			213.2	-37.0722
			213.1	-37.4464
			213	-37.8138
			212.9	-38.1576
			212.8	-38.4875
			212.7	-38.7985
			212.6	-39.1114
			212.5	-39.4409
			212.4	-39.7784
			212.3	-40.145
			212.2	-40.5502
			212.1	-41.0162
			212	-41.5347
			211.9	-42.1119
			211.8	-42.7622
			211.7	-43.47
			211.6	-44.2366
			211.5	-45.0704
			211.4	-45.9341
			211.3	-46.8212
			211.2	-47.73
			211.1	-48.645
			211	-49.5762
			210.9	-50.5009
			210.8	-51.4255
			210.7	-52.3598
			210.6	-53.3044
			210.5	-54.2572
			210.4	-55.2059
			210.3	-56.1775
			210.2	-57.199
			210.1	-58.2601
			210	-59.342
			209.9	-60.4692
			209.8	-61.6317
			209.7	-62.8313
			209.6	-64.0565
			209.5	-65.3064
			209.4	-66.5847
			209.3	-67.8792
			209.2	-69.1845
			209.1	-70.4762
			209	-71.6906
			208.9	-72.8297
			208.8	-73.9126
			208.7	-74.9297
			208.6	-75.9069
			208.5	-76.8545
			208.4	-77.782
			208.3	-78.7172
			208.2	-79.6472
			208.1	-80.5717
			208	-81.4994
			207.9	-82.4485
			207.8	-83.3961
			207.7	-84.3032
			207.6	-85.1594
			207.5	-85.984
			207.4	-86.7506
			207.3	-87.4569
			207.2	-88.129
			207.1	-88.7591
			207	-89.3527
			206.9	-89.8963
			206.8	-90.3947
			206.7	-90.8415
			206.6	-91.2502
			206.5	-91.6859
			206.4	-92.2041
			206.3	-92.8072
			206.2	-93.5286
			206.1	-94.3579
			206	-95.2673
			205.9	-96.2934
			205.8	-97.4568
			205.7	-98.8059
			205.6	-100.284
			205.5	-101.843
			205.4	-103.455
			205.3	-105.059
			205.2	-106.596
			205.1	-108.096
			205	-109.514
			204.9	-110.842
			204.8	-112.107
			204.7	-113.288
			204.6	-114.408
			204.5	-115.476
			204.4	-116.482
			204.3	-117.488
			204.2	-118.508
			204.1	-119.554
			204	-120.664
			203.9	-121.813
			203.8	-123.017
			203.7	-124.305
			203.6	-125.704
			203.5	-127.155
			203.4	-128.753
			203.3	-130.452
			203.2	-132.162
			203.1	-133.879
			203	-135.446
			202.9	-136.78
			202.8	-137.884
			202.7	-138.869
			202.6	-139.691
			202.5	-140.316
			202.4	-140.624
			202.3	-140.508
			202.2	-140.231
			202.1	-139.851
			202	-139.401
			201.9	-138.741
			201.8	-138.022
			201.7	-137.441
			201.6	-137.352
			201.5	-137.83
			201.4	-138.849
			201.3	-140.286
			201.2	-142.124
			201.1	-143.865
			201	-145.469
			200.9	-147.464
			200.8	-149.909
			200.7	-152.044
			200.6	-153.413
			200.5	-153.704
			200.4	-153.254
			200.3	-152.02
			200.2	-150.055
			200.1	-147.679
			200	-144.524

## Sheet: Figure 4C
hL1ORF1p-cc			volume	OD280	OD280	OD280		volume	MW
			(ml)	relative		normalized		(ml)	kDa
Injection volume	100 µl
Superdex 200			11.003	4.41878e-05	0.353503	0.00234611		14.8727	40.2999
			11.0071	4.41414e-05	0.353132	0.00234364		14.8767	40.328
			11.0112	4.40772e-05	0.352618	0.00234023		14.8808	40.3566
			11.0153	4.40044e-05	0.352035	0.00233636		14.8849	40.3872
			11.0194	4.39562e-05	0.35165	0.00233381		14.889	40.414
			11.0235	4.39419e-05	0.351535	0.00233305		14.8931	40.4476
			11.0275	4.39299e-05	0.351439	0.00233241		14.8972	40.4795
			11.0316	4.39182e-05	0.351345	0.00233179		14.9013	40.5079
			11.0357	4.39051e-05	0.351241	0.00233109		14.9054	40.537
			11.0398	4.38898e-05	0.351119	0.00233028		14.9095	40.5667
			11.0439	4.38703e-05	0.350962	0.00232924		14.9136	40.5929
			11.048	4.38455e-05	0.350764	0.00232793		14.9177	40.6189
			11.0521	4.3814e-05	0.350512	0.00232626		14.9218	40.6471
			11.0562	4.37788e-05	0.35023	0.00232439		14.9259	40.6757
			11.0603	4.37479e-05	0.349983	0.00232275		14.93	40.7062
			11.0644	4.3725e-05	0.3498	0.00232153		14.9341	40.7352
			11.0685	4.3718e-05	0.349744	0.00232116		14.9382	40.7638
			11.0726	4.37226e-05	0.349781	0.00232141		14.9423	40.7891
			11.0767	4.37275e-05	0.34982	0.00232166		14.9464	40.8131
			11.0808	4.37208e-05	0.349766	0.00232131		14.9505	40.8404
			11.0849	4.36874e-05	0.349499	0.00231954		14.9545	40.8678
			11.089	4.36388e-05	0.349111	0.00231696		14.9586	40.8964
			11.0931	4.35903e-05	0.348722	0.00231438		14.9627	40.9236
			11.0972	4.35116e-05	0.348093	0.0023102		14.9668	40.9507
			11.1013	4.33768e-05	0.347014	0.00230304		14.9709	40.9762
			11.1053	4.32619e-05	0.346095	0.00229694		14.975	41.0005
			11.1094	4.32321e-05	0.345857	0.00229536		14.9791	41.0249
			11.1135	4.32487e-05	0.34599	0.00229625		14.9832	41.0483
			11.1176	4.32697e-05	0.346157	0.00229736		14.9873	41.0707
			11.1217	4.32868e-05	0.346295	0.00229827		14.9914	41.0945
			11.1258	4.32939e-05	0.346351	0.00229865		14.9955	41.1185
			11.1299	4.32871e-05	0.346296	0.00229828		14.9996	41.1443
			11.134	4.32517e-05	0.346013	0.0022964		15.0037	41.1707
			11.1381	4.32031e-05	0.345625	0.00229382		15.0078	41.1988
			11.1422	4.31871e-05	0.345497	0.00229298		15.0119	41.2224
			11.1463	4.31954e-05	0.345563	0.00229341		15.016	41.2431
			11.1504	4.32e-05	0.3456	0.00229366		15.0201	41.2662
			11.1545	4.31964e-05	0.345572	0.00229347		15.0242	41.2893
			11.1586	4.31808e-05	0.345446	0.00229264		15.0283	41.3112
			11.1627	4.31494e-05	0.345195	0.00229097		15.0324	41.3326
			11.1668	4.31062e-05	0.34485	0.00228868		15.0364	41.3542
			11.1709	4.30441e-05	0.344353	0.00228538		15.0405	41.3764
			11.175	4.29894e-05	0.343915	0.00228248		15.0446	41.3973
			11.1791	4.29875e-05	0.3439	0.00228238		15.0487	41.4153
			11.1832	4.30088e-05	0.34407	0.00228351		15.0528	41.4316
			11.1872	4.30294e-05	0.344236	0.0022846		15.0569	41.4487
			11.1913	4.3048e-05	0.344384	0.00228559		15.061	41.4677
			11.1954	4.30588e-05	0.34447	0.00228616		15.0651	41.4862
			11.1995	4.30538e-05	0.34443	0.0022859		15.0692	41.5038
			11.2036	4.30261e-05	0.344209	0.00228442		15.0733	41.5254
			11.2077	4.29743e-05	0.343794	0.00228168		15.0774	41.5448
			11.2118	4.29213e-05	0.34337	0.00227886		15.0815	41.5655
			11.2159	4.28795e-05	0.343036	0.00227664		15.0856	41.5801
			11.22	4.2848e-05	0.342784	0.00227497		15.0897	41.5947
			11.2241	4.28229e-05	0.342583	0.00227364		15.0938	41.6121
			11.2282	4.27991e-05	0.342393	0.00227237		15.0979	41.6282
			11.2323	4.2775e-05	0.3422	0.0022711		15.102	41.6445
			11.2364	4.27497e-05	0.341997	0.00226975		15.1061	41.6593
			11.2405	4.27168e-05	0.341735	0.00226801		15.1102	41.6711
			11.2446	4.2509e-05	0.340072	0.00225697		15.1143	41.6842
			11.2487	4.19021e-05	0.335217	0.00222475		15.1183	41.6957
			11.2528	4.07457e-05	0.325966	0.00216335		15.1224	41.7055
			11.2569	3.91808e-05	0.313446	0.00208026		15.1265	41.7128
			11.261	3.80764e-05	0.304611	0.00202163		15.1306	41.7261
			11.2651	3.77026e-05	0.301621	0.00200178		15.1347	41.7414
			11.2691	3.76723e-05	0.301379	0.00200017		15.1388	41.753
			11.2732	3.78281e-05	0.302625	0.00200844		15.1429	41.7691
			11.2773	3.80884e-05	0.304707	0.00202226		15.147	41.7846
			11.2814	3.83601e-05	0.306881	0.00203669		15.1511	41.7977
			11.2855	3.86468e-05	0.309175	0.00205191		15.1552	41.8079
			11.2896	3.89204e-05	0.311364	0.00206644		15.1593	41.8175
			11.2937	3.91826e-05	0.313461	0.00208036
			11.2978	3.9433e-05	0.315464	0.00209365
			11.3019	3.96678e-05	0.317343	0.00210612
			11.306	3.98863e-05	0.31909	0.00211772
			11.3101	4.00668e-05	0.320534	0.0021273
			11.3142	4.02126e-05	0.321701	0.00213504
			11.3183	4.03649e-05	0.322919	0.00214313
			11.3224	4.05067e-05	0.324054	0.00215066
			11.3265	4.06351e-05	0.325081	0.00215748
			11.3306	4.07451e-05	0.325961	0.00216332
			11.3347	4.07778e-05	0.326222	0.00216505
			11.3388	4.0662e-05	0.325296	0.00215891
			11.3429	4.04769e-05	0.323816	0.00214908
			11.3469	4.0389e-05	0.323112	0.00214441
			11.351	4.04323e-05	0.323458	0.00214671
			11.3551	4.05044e-05	0.324035	0.00215054
			11.3592	4.05664e-05	0.324531	0.00215383
			11.3633	4.06121e-05	0.324897	0.00215625
			11.3674	4.06227e-05	0.324981	0.00215682
			11.3715	4.06244e-05	0.324995	0.00215691
			11.3756	4.06615e-05	0.325292	0.00215888
			11.3797	4.07132e-05	0.325706	0.00216162
			11.3838	4.07733e-05	0.326186	0.00216481
			11.3879	4.08314e-05	0.326651	0.0021679
			11.392	4.08845e-05	0.327076	0.00217072
			11.3961	4.09311e-05	0.327449	0.00217319
			11.4002	4.09777e-05	0.327822	0.00217567
			11.4043	4.10359e-05	0.328287	0.00217876
			11.4084	4.10968e-05	0.328775	0.00218199
			11.4125	4.11517e-05	0.329213	0.0021849
			11.4166	4.1195e-05	0.32956	0.0021872
			11.4207	4.12233e-05	0.329787	0.00218871
			11.4248	4.12438e-05	0.329951	0.0021898
			11.4288	4.12548e-05	0.330038	0.00219038
			11.4329	4.12641e-05	0.330113	0.00219087
			11.437	4.12836e-05	0.330269	0.00219191
			11.4411	4.13015e-05	0.330412	0.00219286
			11.4452	4.13091e-05	0.330472	0.00219326
			11.4493	4.13025e-05	0.33042	0.00219291
			11.4534	4.13025e-05	0.33042	0.00219291
			11.4575	4.1328e-05	0.330624	0.00219427
			11.4616	4.13508e-05	0.330806	0.00219548
			11.4657	4.13688e-05	0.330951	0.00219643
			11.4698	4.13703e-05	0.330962	0.00219651
			11.4739	4.13425e-05	0.33074	0.00219503
			11.478	4.13024e-05	0.330419	0.00219291
			11.4821	4.1274e-05	0.330192	0.0021914
			11.4862	4.12524e-05	0.33002	0.00219025
			11.4903	4.1251e-05	0.330008	0.00219018
			11.4944	4.12864e-05	0.330292	0.00219206
			11.4985	4.13408e-05	0.330726	0.00219495
			11.5026	4.14e-05	0.3312	0.00219809
			11.5066	4.14451e-05	0.331561	0.00220048
			11.5107	4.14715e-05	0.331772	0.00220189
			11.5148	4.14747e-05	0.331797	0.00220205
			11.5189	4.14584e-05	0.331667	0.00220119
			11.523	4.14117e-05	0.331294	0.00219871
			11.5271	4.13664e-05	0.330931	0.00219631
			11.5312	4.13636e-05	0.330909	0.00219616
			11.5353	4.13596e-05	0.330877	0.00219594
			11.5394	4.13528e-05	0.330822	0.00219558
			11.5435	4.13566e-05	0.330853	0.00219578
			11.5476	4.13878e-05	0.331102	0.00219744
			11.5517	4.14331e-05	0.331465	0.00219985
			11.5558	4.14777e-05	0.331822	0.00220222
			11.5599	4.15215e-05	0.332172	0.00220454
			11.564	4.15633e-05	0.332507	0.00220676
			11.5681	4.15966e-05	0.332773	0.00220853
			11.5722	4.16141e-05	0.332913	0.00220946
			11.5763	4.16111e-05	0.332889	0.0022093
			11.5804	4.15985e-05	0.332788	0.00220863
			11.5845	4.1598e-05	0.332784	0.0022086
			11.5885	4.15889e-05	0.332712	0.00220812
			11.5926	4.15523e-05	0.332418	0.00220617
			11.5967	4.15177e-05	0.332142	0.00220434
			11.6008	4.15284e-05	0.332227	0.0022049
			11.6049	4.15663e-05	0.33253	0.00220692
			11.609	4.15953e-05	0.332762	0.00220846
			11.6131	4.16041e-05	0.332833	0.00220893
			11.6172	4.15913e-05	0.33273	0.00220825
			11.6213	4.15645e-05	0.332516	0.00220682
			11.6254	4.15398e-05	0.332319	0.00220551
			11.6295	4.15213e-05	0.33217	0.00220453
			11.6336	4.15109e-05	0.332087	0.00220397
			11.6377	4.15029e-05	0.332023	0.00220355
			11.6418	4.15046e-05	0.332037	0.00220364
			11.6459	4.15201e-05	0.332161	0.00220447
			11.65	4.15356e-05	0.332285	0.00220529
			11.6541	4.15443e-05	0.332355	0.00220575
			11.6582	4.15441e-05	0.332353	0.00220574
			11.6623	4.15378e-05	0.332302	0.0022054
			11.6664	4.15682e-05	0.332546	0.00220702
			11.6704	4.16518e-05	0.333214	0.00221146
			11.6745	4.1738e-05	0.333904	0.00221604
			11.6786	4.18219e-05	0.334575	0.00222049
			11.6827	4.19084e-05	0.335267	0.00222508
			11.6868	4.19986e-05	0.335989	0.00222987
			11.6909	4.20805e-05	0.336644	0.00223422
			11.695	4.21496e-05	0.337197	0.00223789
			11.6991	4.22069e-05	0.337655	0.00224093
			11.7032	4.22564e-05	0.338051	0.00224356
			11.7073	4.23059e-05	0.338447	0.00224619
			11.7114	4.2374e-05	0.338992	0.0022498
			11.7155	4.24622e-05	0.339697	0.00225448
			11.7196	4.25434e-05	0.340348	0.0022588
			11.7237	4.26158e-05	0.340927	0.00226264
			11.7278	4.26517e-05	0.341213	0.00226454
			11.7319	4.26314e-05	0.341051	0.00226347
			11.736	4.26069e-05	0.340855	0.00226217
			11.7401	4.26057e-05	0.340846	0.00226211
			11.7442	4.25964e-05	0.340771	0.00226161
			11.7482	4.25644e-05	0.340515	0.00225991
			11.7523	4.25094e-05	0.340075	0.00225699
			11.7564	4.24503e-05	0.339602	0.00225385
			11.7605	4.24104e-05	0.339283	0.00225174
			11.7646	4.23801e-05	0.339041	0.00225013
			11.7687	4.23573e-05	0.338859	0.00224892
			11.7728	4.23498e-05	0.338798	0.00224852
			11.7769	4.23605e-05	0.338884	0.00224909
			11.781	4.23708e-05	0.338966	0.00224963
			11.7851	4.23776e-05	0.339021	0.00224999
			11.7892	4.23731e-05	0.338985	0.00224975
			11.7933	4.23513e-05	0.338811	0.0022486
			11.7974	4.23162e-05	0.338529	0.00224673
			11.8015	4.22734e-05	0.338187	0.00224446
			11.8056	4.22398e-05	0.337918	0.00224268
			11.8097	4.2213e-05	0.337704	0.00224125
			11.8138	4.21799e-05	0.337439	0.00223949
			11.8179	4.21289e-05	0.337031	0.00223679
			11.822	4.20771e-05	0.336617	0.00223404
			11.8261	4.20437e-05	0.336349	0.00223226
			11.8301	4.20162e-05	0.33613	0.00223081
			11.8342	4.19875e-05	0.3359	0.00222928
			11.8383	4.19604e-05	0.335683	0.00222784
			11.8424	4.19375e-05	0.3355	0.00222663
			11.8465	4.19107e-05	0.335286	0.00222521
			11.8506	4.18718e-05	0.334974	0.00222314
			11.8547	4.18263e-05	0.334611	0.00222073
			11.8588	4.1776e-05	0.334208	0.00221805
			11.8629	4.17125e-05	0.3337	0.00221468
			11.867	4.16297e-05	0.333038	0.00221028
			11.8711	4.15316e-05	0.332253	0.00220508
			11.8752	4.14541e-05	0.331633	0.00220096
			11.8793	4.14031e-05	0.331225	0.00219825
			11.8834	4.13528e-05	0.330823	0.00219558
			11.8875	4.12836e-05	0.330269	0.00219191
			11.8916	4.11995e-05	0.329596	0.00218744
			11.8957	4.11492e-05	0.329194	0.00218478
			11.8998	4.11198e-05	0.328958	0.00218321
			11.9039	4.10876e-05	0.328701	0.0021815
			11.9079	4.1051e-05	0.328408	0.00217956
			11.912	4.10285e-05	0.328228	0.00217836
			11.9161	4.10393e-05	0.328314	0.00217894
			11.9202	4.10553e-05	0.328442	0.00217979
			11.9243	4.10618e-05	0.328495	0.00218013
			11.9284	4.1051e-05	0.328408	0.00217956
			11.9325	4.10148e-05	0.328119	0.00217764
			11.9366	4.09595e-05	0.327676	0.0021747
			11.9407	4.08741e-05	0.326993	0.00217017
			11.9448	4.07797e-05	0.326237	0.00216515
			11.9489	4.07193e-05	0.325754	0.00216195
			11.953	4.06678e-05	0.325343	0.00215922
			11.9571	4.06146e-05	0.324917	0.00215639
			11.9612	4.05566e-05	0.324453	0.00215331
			11.9653	4.04988e-05	0.32399	0.00215024
			11.9694	4.04493e-05	0.323595	0.00214761
			11.9735	4.04004e-05	0.323203	0.00214502
			11.9776	4.03667e-05	0.322934	0.00214323
			11.9817	4.03604e-05	0.322883	0.00214289
			11.9858	4.03641e-05	0.322913	0.00214309
			11.9898	4.03604e-05	0.322883	0.00214289
			11.9939	4.03323e-05	0.322658	0.0021414
			11.998	4.02884e-05	0.322307	0.00213907
			12.0021	4.02455e-05	0.321964	0.00213679
			12.0062	4.02044e-05	0.321635	0.00213461
			12.0103	4.01545e-05	0.321236	0.00213196
			12.0144	4.01039e-05	0.320831	0.00212927
			12.0185	4.00623e-05	0.320499	0.00212707
			12.0226	4.00254e-05	0.320203	0.00212511
			12.0267	3.99896e-05	0.319917	0.00212321
			12.0308	3.99389e-05	0.319511	0.00212052
			12.0349	3.98751e-05	0.319	0.00211712
			12.039	3.98266e-05	0.318613	0.00211455
			12.0431	3.97781e-05	0.318225	0.00211198
			12.0472	3.97226e-05	0.317781	0.00210903
			12.0513	3.96863e-05	0.31749	0.0021071
			12.0554	3.97021e-05	0.317617	0.00210794
			12.0595	3.97495e-05	0.317996	0.00211046
			12.0636	3.9805e-05	0.31844	0.00211341
			12.0676	3.98554e-05	0.318843	0.00211608
			12.0717	3.98889e-05	0.319111	0.00211786
			12.0758	3.99079e-05	0.319263	0.00211887
			12.0799	3.991e-05	0.31928	0.00211898
			12.084	3.98911e-05	0.319129	0.00211797
			12.0881	3.98737e-05	0.31899	0.00211705
			12.0922	3.98737e-05	0.318989	0.00211705
			12.0963	3.98729e-05	0.318983	0.00211701
			12.1004	3.98702e-05	0.318961	0.00211686
			12.1045	3.98706e-05	0.318965	0.00211689
			12.1086	3.9877e-05	0.319016	0.00211723
			12.1127	3.98744e-05	0.318995	0.00211709
			12.1168	3.98516e-05	0.318813	0.00211588
			12.1209	3.98297e-05	0.318638	0.00211471
			12.125	3.98277e-05	0.318622	0.00211461
			12.1291	3.98283e-05	0.318626	0.00211464
			12.1332	3.98275e-05	0.31862	0.0021146
			12.1373	3.98264e-05	0.318611	0.00211454
			12.1414	3.98509e-05	0.318808	0.00211584
			12.1455	3.99085e-05	0.319268	0.0021189
			12.1495	3.99575e-05	0.31966	0.0021215
			12.1536	3.99913e-05	0.319931	0.0021233
			12.1577	4.00095e-05	0.320076	0.00212426
			12.1618	4.00249e-05	0.320199	0.00212508
			12.1659	4.0036e-05	0.320288	0.00212567
			12.17	4.00303e-05	0.320243	0.00212537
			12.1741	3.9995e-05	0.31996	0.00212349
			12.1782	3.99409e-05	0.319527	0.00212062
			12.1823	3.9873e-05	0.318984	0.00211701
			12.1864	3.97875e-05	0.3183	0.00211247
			12.1905	3.97155e-05	0.317724	0.00210865
			12.1946	3.96931e-05	0.317545	0.00210746
			12.1987	3.96933e-05	0.317546	0.00210747
			12.2028	3.97079e-05	0.317663	0.00210825
			12.2069	3.97245e-05	0.317796	0.00210913
			12.211	3.97399e-05	0.317919	0.00210995
			12.2151	3.97528e-05	0.318022	0.00211063
			12.2192	3.97522e-05	0.318017	0.0021106
			12.2233	3.75251e-05	0.300201	0.00199236
			12.2274	3.22257e-05	0.257806	0.00171099
			12.2314	2.94495e-05	0.235596	0.00156359
			12.2355	3.00401e-05	0.240321	0.00159495
			12.2396	3.05977e-05	0.244781	0.00162455
			12.2437	3.11181e-05	0.248945	0.00165218
			12.2478	3.15867e-05	0.252693	0.00167706
			12.2519	3.19948e-05	0.255958	0.00169873
			12.256	3.23676e-05	0.258941	0.00171852
			12.2601	3.27387e-05	0.26191	0.00173823
			12.2642	3.31274e-05	0.265019	0.00175886
			12.2683	3.35033e-05	0.268027	0.00177882
			12.2724	3.38583e-05	0.270866	0.00179767
			12.2765	3.41803e-05	0.273442	0.00181477
			12.2806	3.44642e-05	0.275714	0.00182984
			12.2847	3.47137e-05	0.277709	0.00184309
			12.2888	3.4923e-05	0.279384	0.0018542
			12.2929	3.50505e-05	0.280404	0.00186097
			12.297	3.51443e-05	0.281154	0.00186595
			12.3011	3.52724e-05	0.282179	0.00187275
			12.3052	3.54184e-05	0.283348	0.0018805
			12.3092	3.55785e-05	0.284628	0.001889
			12.3133	3.57339e-05	0.285871	0.00189725
			12.3174	3.58829e-05	0.287063	0.00190516
			12.3215	3.60209e-05	0.288167	0.00191249
			12.3256	3.6146e-05	0.289168	0.00191914
			12.3297	3.62725e-05	0.29018	0.00192585
			12.3338	3.64286e-05	0.291429	0.00193414
			12.3379	3.66023e-05	0.292819	0.00194336
			12.342	3.67595e-05	0.294076	0.00195171
			12.3461	3.68975e-05	0.29518	0.00195903
			12.3502	3.70166e-05	0.296133	0.00196536
			12.3543	3.71156e-05	0.296925	0.00197061
			12.3584	3.71716e-05	0.297373	0.00197359
			12.3625	3.72083e-05	0.297666	0.00197554
			12.3666	3.72841e-05	0.298273	0.00197956
			12.3707	3.73941e-05	0.299152	0.0019854
			12.3748	3.75111e-05	0.300089	0.00199161
			12.3789	3.76151e-05	0.300921	0.00199713
			12.383	3.7698e-05	0.301584	0.00200154
			12.3871	3.77474e-05	0.301979	0.00200416
			12.3911	3.77533e-05	0.302026	0.00200447
			12.3952	3.77423e-05	0.301938	0.00200389
			12.3993	3.77561e-05	0.302049	0.00200462
			12.4034	3.78033e-05	0.302427	0.00200713
			12.4075	3.7846e-05	0.302768	0.0020094
			12.4116	3.7883e-05	0.303064	0.00201136
			12.4157	3.79219e-05	0.303375	0.00201342
			12.4198	3.7972e-05	0.303776	0.00201608
			12.4239	3.80282e-05	0.304225	0.00201907
			12.428	3.80703e-05	0.304563	0.0020213
			12.4321	3.80774e-05	0.304619	0.00202168
			12.4362	3.80673e-05	0.304538	0.00202114
			12.4403	3.80602e-05	0.304482	0.00202077
			12.4444	3.80505e-05	0.304404	0.00202025
			12.4485	3.80438e-05	0.30435	0.00201989
			12.4526	3.80421e-05	0.304337	0.00201981
			12.4567	3.80373e-05	0.304299	0.00201955
			12.4608	3.80279e-05	0.304223	0.00201905
			12.4649	3.80226e-05	0.304181	0.00201877
			12.4689	3.80339e-05	0.304271	0.00201937
			12.473	3.80517e-05	0.304414	0.00202032
			12.4771	3.80577e-05	0.304462	0.00202064
			12.4812	3.8035e-05	0.30428	0.00201943
			12.4853	3.80048e-05	0.304038	0.00201782
			12.4894	3.7993e-05	0.303944	0.0020172
			12.4935	3.79878e-05	0.303902	0.00201692
			12.4976	3.79798e-05	0.303839	0.0020165
			12.5017	3.7947e-05	0.303576	0.00201476
			12.5058	3.79144e-05	0.303315	0.00201302
			12.5099	3.79284e-05	0.303427	0.00201377
			12.514	3.79361e-05	0.303489	0.00201418
			12.5181	3.79332e-05	0.303465	0.00201402
			12.5222	3.79075e-05	0.30326	0.00201266
			12.5263	3.78554e-05	0.302843	0.00200989
			12.5304	3.77923e-05	0.302338	0.00200654
			12.5345	3.77324e-05	0.301859	0.00200336
			12.5386	3.76768e-05	0.301414	0.00200041
			12.5427	3.76234e-05	0.300987	0.00199757
			12.5468	3.7567e-05	0.300536	0.00199458
			12.5508	3.75004e-05	0.300003	0.00199105
			12.5549	3.74259e-05	0.299407	0.00198709
			12.559	3.73851e-05	0.299081	0.00198492
			12.5631	3.73796e-05	0.299037	0.00198463
			12.5672	3.73625e-05	0.2989	0.00198372
			12.5713	3.73277e-05	0.298621	0.00198187
			12.5754	3.72721e-05	0.298176	0.00197892
			12.5795	3.72244e-05	0.297795	0.00197639
			12.5836	3.72019e-05	0.297616	0.0019752
			12.5877	3.71833e-05	0.297467	0.00197421
			12.5918	3.71608e-05	0.297286	0.00197301
			12.5959	3.71305e-05	0.297044	0.0019714
			12.6	3.70728e-05	0.296582	0.00196834
			12.6041	3.69774e-05	0.295819	0.00196328
			12.6082	3.68799e-05	0.29504	0.0019581
			12.6123	3.68296e-05	0.294637	0.00195543
			12.6164	3.68224e-05	0.294579	0.00195505
			12.6205	3.68146e-05	0.294516	0.00195463
			12.6246	3.68051e-05	0.294441	0.00195413
			12.6287	3.67885e-05	0.294308	0.00195325
			12.6327	3.67663e-05	0.29413	0.00195207
			12.6368	3.67469e-05	0.293975	0.00195104
			12.6409	3.67231e-05	0.293785	0.00194977
			12.645	3.67048e-05	0.293638	0.0019488
			12.6491	3.66996e-05	0.293597	0.00194853
			12.6532	3.66949e-05	0.293559	0.00194828
			12.6573	3.66855e-05	0.293484	0.00194778
			12.6614	3.6589e-05	0.292712	0.00194265
			12.6655	3.63832e-05	0.291065	0.00193172
			12.6696	3.62499e-05	0.289999	0.00192465
			12.6737	3.62116e-05	0.289693	0.00192262
			12.6778	3.62159e-05	0.289727	0.00192284
			12.6819	3.62548e-05	0.290038	0.00192491
			12.686	3.63119e-05	0.290495	0.00192794
			12.6901	3.63703e-05	0.290962	0.00193104
			12.6942	3.64208e-05	0.291366	0.00193372
			12.6983	3.64574e-05	0.291659	0.00193567
			12.7024	3.64605e-05	0.291684	0.00193583
			12.7065	3.64369e-05	0.291495	0.00193458
			12.7105	3.64196e-05	0.291357	0.00193366
			12.7146	3.64119e-05	0.291295	0.00193325
			12.7187	3.64131e-05	0.291305	0.00193331
			12.7228	3.64114e-05	0.291291	0.00193322
			12.7269	3.64023e-05	0.291218	0.00193274
			12.731	3.63829e-05	0.291063	0.00193171
			12.7351	3.63511e-05	0.290809	0.00193002
			12.7392	3.63109e-05	0.290487	0.00192789
			12.7433	3.6257e-05	0.290056	0.00192503
			12.7474	3.61919e-05	0.289535	0.00192157
			12.7515	3.61485e-05	0.289188	0.00191927
			12.7556	3.61376e-05	0.2891	0.00191869
			12.7597	3.61342e-05	0.289074	0.00191851
			12.7638	3.61351e-05	0.28908	0.00191855
			12.7679	3.61344e-05	0.289076	0.00191852
			12.772	3.61276e-05	0.289021	0.00191816
			12.7761	3.61091e-05	0.288872	0.00191717
			12.7802	3.60717e-05	0.288574	0.00191519
			12.7843	3.60044e-05	0.288035	0.00191161
			12.7884	3.59155e-05	0.287324	0.00190689
			12.7924	3.58375e-05	0.2867	0.00190275
			12.7965	3.57512e-05	0.286009	0.00189817
			12.8006	3.56393e-05	0.285115	0.00189223
			12.8047	3.55176e-05	0.284141	0.00188577
			12.8088	3.54145e-05	0.283316	0.0018803
			12.8129	3.53313e-05	0.28265	0.00187588
			12.817	3.52547e-05	0.282037	0.00187181
			12.8211	3.52085e-05	0.281668	0.00186936
			12.8252	3.51989e-05	0.281591	0.00186885
			12.8293	3.51843e-05	0.281475	0.00186807
			12.8334	3.51618e-05	0.281294	0.00186688
			12.8375	3.51454e-05	0.281163	0.00186601
			12.8416	3.51479e-05	0.281183	0.00186614
			12.8457	3.51484e-05	0.281187	0.00186617
			12.8498	3.51421e-05	0.281137	0.00186583
			12.8539	3.53614e-05	0.282891	0.00187747
			12.858	3.66484e-05	0.293187	0.00194581
			12.8621	3.94134e-05	0.315307	0.00209261
			12.8662	4.2711e-05	0.341688	0.0022677
			12.8702	4.58211e-05	0.366569	0.00243282
			12.8743	4.87512e-05	0.39001	0.00258839
			12.8784	5.15068e-05	0.412054	0.0027347
			12.8825	5.41029e-05	0.432823	0.00287253
			12.8866	5.65624e-05	0.452499	0.00300312
			12.8907	5.8886e-05	0.471088	0.00312649
			12.8948	6.10787e-05	0.488629	0.00324291
			12.8989	6.31463e-05	0.50517	0.00335268
			12.903	6.50948e-05	0.520758	0.00345614
			12.9071	6.69283e-05	0.535426	0.00355349
			12.9112	6.86546e-05	0.549237	0.00364514
			12.9153	7.02799e-05	0.562239	0.00373144
			12.9194	7.18035e-05	0.574428	0.00381233
			12.9235	7.32154e-05	0.585723	0.00388729
			12.9276	7.45322e-05	0.596258	0.00395721
			12.9317	7.58002e-05	0.606402	0.00402453
			12.9358	7.70007e-05	0.616006	0.00408827
			12.9399	7.81224e-05	0.624979	0.00414782
			12.944	7.91638e-05	0.63331	0.00420312
			12.9481	8.0131e-05	0.641048	0.00425447
			12.9521	8.10422e-05	0.648338	0.00430285
			12.9562	8.18987e-05	0.65519	0.00434832
			12.9603	8.27147e-05	0.661718	0.00439165
			12.9644	8.35139e-05	0.668111	0.00443408
			12.9685	8.42974e-05	0.674379	0.00447568
			12.9726	8.50478e-05	0.680382	0.00451552
			12.9767	8.57551e-05	0.686041	0.00455308
			12.9808	8.64209e-05	0.691368	0.00458843
			12.9849	8.70418e-05	0.696335	0.00462139
			12.989	8.75915e-05	0.700732	0.00465058
			12.9931	8.80711e-05	0.704569	0.00467604
			12.9972	8.85247e-05	0.708198	0.00470013
			13.0013	8.89514e-05	0.711611	0.00472278
			13.0054	8.93456e-05	0.714765	0.00474371
			13.0095	8.97096e-05	0.717677	0.00476304
			13.0136	9.00538e-05	0.720431	0.00478131
			13.0177	9.04036e-05	0.723229	0.00479989
			13.0218	9.07583e-05	0.726067	0.00481872
			13.0259	9.10913e-05	0.72873	0.00483639
			13.0299	9.14016e-05	0.731213	0.00485287
			13.034	9.17138e-05	0.733711	0.00486945
			13.0381	9.20426e-05	0.736341	0.0048869
			13.0422	9.23522e-05	0.738818	0.00490334
			13.0463	9.2643e-05	0.741144	0.00491878
			13.0504	9.29076e-05	0.743261	0.00493283
			13.0545	9.31438e-05	0.74515	0.00494537
			13.0586	9.3358e-05	0.746864	0.00495674
			13.0627	9.35468e-05	0.748375	0.00496677
			13.0668	9.37205e-05	0.749764	0.00497599
			13.0709	9.3879e-05	0.751032	0.00498441
			13.075	9.40197e-05	0.752158	0.00499188
			13.0791	9.41501e-05	0.753201	0.0049988
			13.0832	9.42826e-05	0.754261	0.00500583
			13.0873	9.44101e-05	0.755281	0.0050126
			13.0914	9.45278e-05	0.756222	0.00501885
			13.0955	9.46288e-05	0.757031	0.00502422
			13.0996	9.47101e-05	0.757681	0.00502853
			13.1037	9.4775e-05	0.7582	0.00503198
			13.1078	9.48361e-05	0.758689	0.00503522
			13.1118	9.4894e-05	0.759152	0.0050383
			13.1159	9.4959e-05	0.759672	0.00504175
			13.12	9.50326e-05	0.760261	0.00504566
			13.1241	9.50959e-05	0.760767	0.00504901
			13.1282	9.51469e-05	0.761175	0.00505172
			13.1323	9.51685e-05	0.761348	0.00505287
			13.1364	9.51709e-05	0.761367	0.005053
			13.1405	9.51922e-05	0.761538	0.00505413
			13.1446	9.5227e-05	0.761816	0.00505598
			13.1487	9.52719e-05	0.762175	0.00505836
			13.1528	9.53132e-05	0.762506	0.00506055
			13.1569	9.53506e-05	0.762805	0.00506254
			13.161	9.53785e-05	0.763028	0.00506402
			13.1651	9.53912e-05	0.76313	0.0050647
			13.1692	9.54025e-05	0.76322	0.00506529
			13.1733	9.54284e-05	0.763427	0.00506667
			13.1774	9.5464e-05	0.763712	0.00506856
			13.1815	9.55033e-05	0.764027	0.00507065
			13.1856	9.55639e-05	0.764511	0.00507386
			13.1897	9.56495e-05	0.765196	0.00507841
			13.1937	9.57282e-05	0.765825	0.00508258
			13.1978	9.57989e-05	0.766391	0.00508634
			13.2019	9.58303e-05	0.766643	0.00508801
			13.206	9.58043e-05	0.766435	0.00508663
			13.2101	9.57792e-05	0.766233	0.00508529
			13.2142	9.57778e-05	0.766222	0.00508522
			13.2183	9.57797e-05	0.766237	0.00508532
			13.2224	9.57765e-05	0.766212	0.00508515
			13.2265	9.57605e-05	0.766084	0.0050843
			13.2306	9.57421e-05	0.765937	0.00508333
			13.2347	9.58156e-05	0.766525	0.00508723
			13.2388	9.67104e-05	0.773683	0.00513473
			13.2429	9.89346e-05	0.791477	0.00525283
			13.247	0.000101688	0.813502	0.005399
			13.2511	0.000104595	0.836764	0.00555339
			13.2552	0.000107481	0.859847	0.00570658
			13.2593	0.000110288	0.882302	0.00585561
			13.2634	0.000112987	0.903896	0.00599892
			13.2675	0.000115533	0.924267	0.00613412
			13.2715	0.000117932	0.943457	0.00626148
			13.2756	0.000120188	0.961503	0.00638125
			13.2797	0.000122323	0.978582	0.0064946
			13.2838	0.000124362	0.994897	0.00660287
			13.2879	0.000126293	1.01035	0.00670541
			13.292	0.000128112	1.0249	0.00680199
			13.2961	0.000129822	1.03858	0.00689278
			13.3002	0.000131419	1.05135	0.00697756
			13.3043	0.000132905	1.06324	0.00705642
			13.3084	0.000134292	1.07433	0.00713007
			13.3125	0.000135585	1.08468	0.00719872
			13.3166	0.000136804	1.09443	0.00726344
			13.3207	0.000137947	1.10358	0.00732415
			13.3248	0.000139004	1.11203	0.00738025
			13.3289	0.000139979	1.11983	0.00743204
			13.333	0.000140895	1.12716	0.00748065
			13.3371	0.000141755	1.13404	0.00752633
			13.3412	0.000142555	1.14044	0.00756881
			13.3453	0.000143296	1.14637	0.00760814
			13.3494	0.000144012	1.1521	0.00764619
			13.3534	0.000144715	1.15772	0.00768348
			13.3575	0.000145375	1.163	0.00771855
			13.3616	0.000145994	1.16795	0.00775138
			13.3657	0.000146563	1.17251	0.00778162
			13.3698	0.000147087	1.17669	0.00780942
			13.3739	0.000147568	1.18055	0.00783497
			13.378	0.000147983	1.18386	0.007857
			13.3821	0.000148354	1.18683	0.00787668
			13.3862	0.000148728	1.18982	0.00789655
			13.3903	0.0001491	1.1928	0.00791631
			13.3944	0.000149461	1.19569	0.0079355
			13.3985	0.000149808	1.19846	0.00795388
			13.4026	0.000150142	1.20114	0.00797164
			13.4067	0.000150465	1.20372	0.00798876
			13.4108	0.000150767	1.20614	0.00800483
			13.4149	0.000151045	1.20836	0.00801955
			13.419	0.000151915	1.21532	0.00806575
			13.4231	0.000154366	1.23493	0.00819588
			13.4272	0.000157786	1.26229	0.0083775
			13.4312	0.000161129	1.28903	0.00855498
			13.4353	0.000164352	1.31482	0.00872611
			13.4394	0.000167389	1.33911	0.00888734
			13.4435	0.000170242	1.36193	0.0090388
			13.4476	0.000172915	1.38332	0.00918071
			13.4517	0.000175419	1.40335	0.00931368
			13.4558	0.000177786	1.42229	0.00943936
			13.4599	0.00018003	1.44024	0.00955848
			13.464	0.000182136	1.45709	0.00967032
			13.4681	0.000184098	1.47278	0.00977446
			13.4722	0.000185932	1.48745	0.00987185
			13.4763	0.000187663	1.50131	0.00996379
			13.4804	0.000189301	1.51441	0.0100507
			13.4845	0.00019086	1.52688	0.0101335
			13.4886	0.000192356	1.53885	0.0102129
			13.4927	0.000193777	1.55021	0.0102884
			13.4968	0.000195117	1.56093	0.0103595
			13.5009	0.000196371	1.57097	0.0104261
			13.505	0.000197539	1.58031	0.0104881
			13.5091	0.000198632	1.58905	0.0105461
			13.5131	0.000199687	1.5975	0.0106022
			13.5172	0.000200711	1.60569	0.0106566
			13.5213	0.000201689	1.61351	0.0107084
			13.5254	0.000202626	1.62101	0.0107582
			13.5295	0.000203515	1.62812	0.0108054
			13.5336	0.000204354	1.63484	0.01085
			13.5377	0.000205143	1.64115	0.0108919
			13.5418	0.000206265	1.65012	0.0109514
			13.5459	0.000208583	1.66867	0.0110745
			13.55	0.000211963	1.6957	0.0112539
			13.5541	0.000215545	1.72436	0.0114441
			13.5582	0.000219158	1.75326	0.011636
			13.5623	0.000222568	1.78055	0.011817
			13.5664	0.000225787	1.80629	0.0119879
			13.5705	0.000228841	1.83072	0.01215
			13.5746	0.000231747	1.85398	0.0123044
			13.5787	0.000234487	1.8759	0.0124498
			13.5828	0.000237065	1.89652	0.0125867
			13.5869	0.000239463	1.91571	0.0127141
			13.591	0.000241696	1.93357	0.0128326
			13.595	0.000243821	1.95056	0.0129454
			13.5991	0.000245824	1.96659	0.0130518
			13.6032	0.000247704	1.98163	0.0131516
			13.6073	0.000249464	1.99571	0.013245
			13.6114	0.000251129	2.00903	0.0133334
			13.6155	0.000252734	2.02187	0.0134186
			13.6196	0.000254266	2.03413	0.0135
			13.6237	0.000255724	2.04579	0.0135774
			13.6278	0.000257107	2.05686	0.0136508
			13.6319	0.000258404	2.06723	0.0137197
			13.636	0.000259615	2.07692	0.013784
			13.6401	0.000260744	2.08595	0.0138439
			13.6442	0.000261807	2.09445	0.0139004
			13.6483	0.000263173	2.10538	0.0139729
			13.6524	0.000265692	2.12554	0.0141066
			13.6565	0.000269425	2.1554	0.0143048
			13.6606	0.00027345	2.1876	0.0145185
			13.6647	0.00027728	2.21824	0.0147219
			13.6688	0.000280899	2.24719	0.0149141
			13.6728	0.000284309	2.27447	0.0150951
			13.6769	0.000287511	2.30009	0.0152651
			13.681	0.000290513	2.3241	0.0154245
			13.6851	0.000293329	2.34663	0.015574
			13.6892	0.00029598	2.36784	0.0157147
			13.6933	0.000298466	2.38773	0.0158467
			13.6974	0.000300799	2.40639	0.0159706
			13.7015	0.000303017	2.42414	0.0160884
			13.7056	0.000305137	2.4411	0.0162009
			13.7097	0.000307124	2.45699	0.0163064
			13.7138	0.000308978	2.47183	0.0164049
			13.7179	0.000310717	2.48573	0.0164972
			13.722	0.000312824	2.50259	0.0166091
			13.7261	0.000316197	2.52957	0.0167881
			13.7302	0.000320572	2.56457	0.0170204
			13.7343	0.000324985	2.59988	0.0172547
			13.7384	0.000329283	2.63427	0.017483
			13.7425	0.00033341	2.66728	0.0177021
			13.7466	0.000337343	2.69874	0.0179109
			13.7507	0.000341044	2.72835	0.0181074
			13.7547	0.00034452	2.75616	0.0182919
			13.7588	0.000347778	2.78223	0.0184649
			13.7629	0.000350846	2.80676	0.0186278
			13.767	0.000353762	2.8301	0.0187826
			13.7711	0.00035729	2.85832	0.0189699
			13.7752	0.000362032	2.89625	0.0192217
			13.7793	0.000367345	2.93876	0.0195038
			13.7834	0.000372856	2.98285	0.0197964
			13.7875	0.000378054	3.02443	0.0200724
			13.7916	0.000382957	3.06366	0.0203327
			13.7957	0.000387574	3.10059	0.0205778
			13.7998	0.000391913	3.1353	0.0208082
			13.8039	0.000396034	3.16827	0.021027
			13.808	0.00040029	3.20232	0.021253
			13.8121	0.000405474	3.24379	0.0215282
			13.8162	0.000411594	3.29276	0.0218532
			13.8203	0.000417867	3.34294	0.0221862
			13.8244	0.000424073	3.39259	0.0225157
			13.8285	0.000429914	3.43931	0.0228258
			13.8325	0.000435398	3.48318	0.023117
			13.8366	0.000440747	3.52598	0.023401
			13.8407	0.000446827	3.57462	0.0237238
			13.8448	0.000453893	3.63114	0.024099
			13.8489	0.000461052	3.68842	0.0244791
			13.853	0.000468114	3.74491	0.024854
			13.8571	0.000474971	3.79977	0.0252181
			13.8612	0.000481518	3.85215	0.0255657
			13.8653	0.000488509	3.90807	0.0259369
			13.8694	0.000496821	3.97456	0.0263782
			13.8735	0.000505635	4.04508	0.0268461
			13.8776	0.000513965	4.11172	0.0272884
			13.8817	0.000521824	4.17459	0.0277057
			13.8858	0.000529958	4.23966	0.0281375
			13.8899	0.000539391	4.31513	0.0286384
			13.894	0.000549341	4.39473	0.0291667
			13.8981	0.000558761	4.47009	0.0296668
			13.9022	0.000568116	4.54492	0.0301635
			13.9063	0.00057832	4.62656	0.0307053
			13.9104	0.000589143	4.71314	0.0312799
			13.9144	0.000599685	4.79748	0.0318396
			13.9185	0.000610237	4.8819	0.0323999
			13.9226	0.000621506	4.97205	0.0329982
			13.9267	0.000633473	5.06778	0.0336336
			13.9308	0.000645194	5.16155	0.0342559
			13.9349	0.00065676	5.25408	0.03487
			13.939	0.000669115	5.35292	0.0355259
			13.9431	0.000682092	5.45673	0.0362149
			13.9472	0.000694919	5.55935	0.036896
			13.9513	0.000708003	5.66402	0.0375907
			13.9554	0.000721891	5.77513	0.0383281
			13.9595	0.000735762	5.8861	0.0390645
			13.9636	0.000749465	5.99572	0.039792
			13.9677	0.000764017	6.11214	0.0405647
			13.9718	0.000778947	6.23158	0.0413574
			13.9759	0.000793755	6.35004	0.0421436
			13.98	0.000809235	6.47388	0.0429655
			13.9841	0.000825085	6.60068	0.043807
			13.9882	0.000840869	6.72696	0.0446451
			13.9922	0.000857298	6.85839	0.0455174
			13.9963	0.00087398	6.99184	0.0464031
			14.0004	0.000890672	7.12537	0.0472893
			14.0045	0.000908153	7.26522	0.0482174
			14.0086	0.000926033	7.40826	0.0491667
			14.0127	0.000944245	7.55396	0.0501337
			14.0168	0.000962876	7.70301	0.0511229
			14.0209	0.000981682	7.85346	0.0521214
			14.025	0.00100117	8.00937	0.0531561
			14.0291	0.0010211	8.1688	0.0542142
			14.0332	0.00104137	8.33092	0.0552902
			14.0373	0.00106207	8.49656	0.0563895
			14.0414	0.0010831	8.66482	0.0575062
			14.0455	0.0011046	8.83682	0.0586477
			14.0496	0.00112652	9.01219	0.0598116
			14.0537	0.00114891	9.19132	0.0610004
			14.0578	0.00117168	9.37345	0.0622091
			14.0619	0.00119486	9.55887	0.0634397
			14.066	0.0012184	9.74716	0.0646894
			14.0701	0.00124227	9.93816	0.065957
			14.0741	0.00126645	10.1316	0.0672408
			14.0782	0.0012911	10.3288	0.0685497
			14.0823	0.00131621	10.5297	0.0698829
			14.0864	0.00134166	10.7333	0.071234
			14.0905	0.00136743	10.9395	0.0726023
			14.0946	0.00139365	11.1492	0.0739944
			14.0987	0.00142033	11.3626	0.0754109
			14.1028	0.00144728	11.5782	0.0768418
			14.1069	0.00147455	11.7964	0.0782898
			14.111	0.00150223	12.0178	0.0797593
			14.1151	0.0015303	12.2424	0.0812499
			14.1192	0.00155869	12.4696	0.0827572
			14.1233	0.0015875	12.7	0.0842866
			14.1274	0.00161661	12.9329	0.085832
			14.1315	0.00164613	13.169	0.0873994
			14.1356	0.00167591	13.4073	0.0889808
			14.1397	0.00170612	13.6489	0.0905845
			14.1438	0.00173678	13.8942	0.0922125
			14.1479	0.00176767	14.1414	0.0938528
			14.152	0.00179913	14.3931	0.0955231
			14.156	0.00183101	14.6481	0.0972155
			14.1601	0.00186325	14.906	0.0989271
			14.1642	0.00189577	15.1662	0.100654
			14.1683	0.00192844	15.4275	0.102389
			14.1724	0.00196162	15.693	0.10415
			14.1765	0.00199507	15.9605	0.105926
			14.1806	0.00202877	16.2302	0.107716
			14.1847	0.0020631	16.5048	0.109538
			14.1888	0.00209763	16.781	0.111371
			14.1929	0.00213237	17.059	0.113216
			14.197	0.00216748	17.3398	0.11508
			14.2011	0.0022028	17.6224	0.116955
			14.2052	0.0022385	17.908	0.118851
			14.2093	0.00227441	18.1953	0.120757
			14.2134	0.00231048	18.4838	0.122672
			14.2175	0.00234708	18.7766	0.124615
			14.2216	0.00238405	19.0724	0.126578
			14.2257	0.00242116	19.3693	0.128549
			14.2298	0.00245869	19.6696	0.130542
			14.2338	0.00249656	19.9724	0.132552
			14.2379	0.00253446	20.2757	0.134565
			14.242	0.00257277	20.5822	0.136598
			14.2461	0.00261187	20.895	0.138674
			14.2502	0.00265148	21.2119	0.140778
			14.2543	0.00269126	21.5301	0.14289
			14.2584	0.00273127	21.8502	0.145014
			14.2625	0.00277178	22.1742	0.147165
			14.2666	0.00281282	22.5026	0.149344
			14.2707	0.00285435	22.8348	0.151549
			14.2748	0.00289631	23.1705	0.153776
			14.2789	0.00293871	23.5097	0.156028
			14.283	0.00298169	23.8535	0.15831
			14.2871	0.00302513	24.201	0.160616
			14.2912	0.00306884	24.5507	0.162937
			14.2953	0.00311296	24.9037	0.165279
			14.2994	0.0031577	25.2616	0.167655
			14.3035	0.00320309	25.6247	0.170065
			14.3076	0.00324919	25.9935	0.172512
			14.3117	0.00329584	26.3667	0.174989
			14.3157	0.00334287	26.7429	0.177486
			14.3198	0.00339028	27.1222	0.180003
			14.3239	0.00343817	27.5054	0.182546
			14.328	0.00348662	27.893	0.185118
			14.3321	0.00353563	28.2851	0.187721
			14.3362	0.00358523	28.6818	0.190354
			14.3403	0.00363546	29.0837	0.193021
			14.3444	0.00368646	29.4917	0.195729
			14.3485	0.0037382	29.9056	0.198476
			14.3526	0.00379076	30.3261	0.201267
			14.3567	0.00384418	30.7535	0.204103
			14.3608	0.00389823	31.1859	0.206973
			14.3649	0.00395302	31.6242	0.209881
			14.369	0.00400886	32.0709	0.212846
			14.3731	0.00406584	32.5267	0.215871
			14.3772	0.00412376	32.9901	0.218947
			14.3813	0.00418256	33.4605	0.222069
			14.3854	0.00424227	33.9381	0.225239
			14.3895	0.00430286	34.4229	0.228456
			14.3935	0.00436441	34.9152	0.231723
			14.3976	0.0044271	35.4168	0.235052
			14.4017	0.00449093	35.9275	0.238441
			14.4058	0.00455569	36.4456	0.24188
			14.4099	0.00462146	36.9717	0.245372
			14.414	0.00468829	37.5063	0.24892
			14.4181	0.00475625	38.05	0.252528
			14.4222	0.00482537	38.6029	0.256198
			14.4263	0.0048957	39.1656	0.259932
			14.4304	0.00496747	39.7397	0.263742
			14.4345	0.00504066	40.3253	0.267628
			14.4386	0.00511521	40.9217	0.271586
			14.4427	0.00519102	41.5281	0.275612
			14.4468	0.00526796	42.1437	0.279697
			14.4509	0.00534607	42.7685	0.283844
			14.455	0.0054255	43.404	0.288061
			14.4591	0.00550638	44.0511	0.292356
			14.4632	0.00558871	44.7097	0.296727
			14.4673	0.00567243	45.3794	0.301171
			14.4714	0.00575752	46.0601	0.305689
			14.4754	0.00584401	46.7521	0.310281
			14.4795	0.00593169	47.4535	0.314937
			14.4836	0.00602052	48.1642	0.319653
			14.4877	0.00611083	48.8866	0.324448
			14.4918	0.00620294	49.6236	0.329339
			14.4959	0.00629717	50.3773	0.334341
			14.5	0.00639325	51.146	0.339443
			14.5041	0.00649062	51.925	0.344613
			14.5082	0.00658943	52.7154	0.349859
			14.5123	0.00668993	53.5194	0.355195
			14.5164	0.00679202	54.3362	0.360615
			14.5205	0.00689552	55.1641	0.36611
			14.5246	0.00700025	56.002	0.371671
			14.5287	0.0071063	56.8504	0.377301
			14.5328	0.00721394	57.7116	0.383017
			14.5369	0.00732324	58.586	0.38882
			14.541	0.00743413	59.4731	0.394707
			14.5451	0.00754671	60.3737	0.400685
			14.5492	0.00766083	61.2867	0.406744
			14.5532	0.00777626	62.2101	0.412872
			14.5573	0.00789295	63.1436	0.419068
			14.5614	0.00801089	64.0871	0.42533
			14.5655	0.0081302	65.0416	0.431664
			14.5696	0.00825101	66.0081	0.438078
			14.5737	0.00837317	66.9854	0.444565
			14.5778	0.00849672	67.9738	0.451125
			14.5819	0.00862176	68.9741	0.457763
			14.586	0.0087479	69.9832	0.464461
			14.5901	0.00887492	70.9994	0.471205
			14.5942	0.00900304	72.0243	0.478007
			14.5983	0.00913227	73.0582	0.484868
			14.6024	0.00926253	74.1002	0.491784
			14.6065	0.00939384	75.1507	0.498756
			14.6106	0.00952612	76.209	0.505779
			14.6147	0.00965911	77.2729	0.51284
			14.6188	0.00979248	78.3398	0.519921
			14.6229	0.00992631	79.4105	0.527027
			14.627	0.0100609	80.4875	0.534175
			14.6311	0.0101964	81.5711	0.541366
			14.6351	0.0103325	82.6596	0.548591
			14.6392	0.0104688	83.7505	0.555831
			14.6433	0.0106054	84.8432	0.563082
			14.6474	0.0107425	85.9399	0.570361
			14.6515	0.0108802	87.0414	0.577671
			14.6556	0.0110182	88.1454	0.584998
			14.6597	0.0111563	89.2507	0.592334
			14.6638	0.0112946	90.3569	0.599676
			14.6679	0.0114328	91.4625	0.607013
			14.672	0.0115709	92.5674	0.614346
			14.6761	0.011709	93.6718	0.621675
			14.6802	0.011847	94.7762	0.629005
			14.6843	0.011985	95.8796	0.636328
			14.6884	0.0121224	96.9792	0.643626
			14.6925	0.0122595	98.0758	0.650904
			14.6966	0.0123966	99.1725	0.658182
			14.7007	0.0125337	100.27	0.665464
			14.7048	0.0126707	101.366	0.672737
			14.7089	0.0128072	102.458	0.679986
			14.713	0.0129432	103.546	0.687205
			14.717	0.0130784	104.627	0.694383
			14.7211	0.0132126	105.701	0.701508
			14.7252	0.0133461	106.769	0.708597
			14.7293	0.0134791	107.833	0.71566
			14.7334	0.0136114	108.891	0.722682
			14.7375	0.0137426	109.941	0.72965
			14.7416	0.0138728	110.982	0.736561
			14.7457	0.0140019	112.015	0.743416
			14.7498	0.01413	113.04	0.750217
			14.7539	0.0142572	114.058	0.756971
			14.758	0.0143833	115.067	0.763667
			14.7621	0.0145082	116.066	0.770297
			14.7662	0.0146318	117.055	0.776861
			14.7703	0.014754	118.032	0.783347
			14.7744	0.0148751	119.001	0.789776
			14.7785	0.0149951	119.96	0.796147
			14.7826	0.0151136	120.909	0.80244
			14.7867	0.0152306	121.845	0.808654
			14.7908	0.0153463	122.77	0.814794
			14.7948	0.0154606	123.685	0.820864
			14.7989	0.0155735	124.588	0.826859
			14.803	0.0156848	125.479	0.83277
			14.8071	0.0157946	126.357	0.838598
			14.8112	0.0159028	127.223	0.844343
			14.8153	0.0160091	128.073	0.849984
			14.8194	0.0161133	128.907	0.855521
			14.8235	0.0162161	129.729	0.860977
			14.8276	0.0163174	130.54	0.866357
			14.8317	0.016417	131.336	0.871642
			14.8358	0.0165145	132.116	0.876818
			14.8399	0.01661	132.88	0.881891
			14.844	0.0167038	133.63	0.886869
			14.8481	0.0167957	134.366	0.89175
			14.8522	0.0168857	135.086	0.896528
			14.8563	0.0169738	135.791	0.901207
			14.8604	0.0170601	136.481	0.905787
			14.8645	0.0171444	137.155	0.910263
			14.8686	0.0172266	137.813	0.91463
			14.8727	0.0173067	138.454	0.918882
			14.8767	0.0173849	139.08	0.923035
			14.8808	0.0174615	139.692	0.927101
			14.8849	0.0175359	140.287	0.931051
			14.889	0.0176081	140.865	0.934885
			14.8931	0.0176784	141.428	0.938618
			14.8972	0.0177466	141.973	0.942236
			14.9013	0.0178128	142.502	0.945749
			14.9054	0.0178769	143.015	0.949154
			14.9095	0.017939	143.512	0.952453
			14.9136	0.0179989	143.992	0.955635
			14.9177	0.0180565	144.452	0.958692
			14.9218	0.0181125	144.9	0.961665
			14.9259	0.0181665	145.332	0.96453
			14.93	0.0182176	145.741	0.967246
			14.9341	0.0182668	146.134	0.969857
			14.9382	0.0183145	146.516	0.97239
			14.9423	0.0183602	146.882	0.974818
			14.9464	0.0184038	147.23	0.97713
			14.9505	0.0184449	147.559	0.979311
			14.9545	0.0184836	147.869	0.981368
			14.9586	0.0185202	148.161	0.983308
			14.9627	0.0185547	148.437	0.98514
			14.9668	0.0185872	148.698	0.986868
			14.9709	0.0186179	148.943	0.988497
			14.975	0.0186468	149.174	0.990032
			14.9791	0.018674	149.392	0.991476
			14.9832	0.0186989	149.591	0.992797
			14.9873	0.0187206	149.765	0.993953
			14.9914	0.0187402	149.922	0.994993
			14.9955	0.0187587	150.069	0.995972
			14.9996	0.0187754	150.203	0.996858
			15.0037	0.0187894	150.315	0.997603
			15.0078	0.0188015	150.412	0.998246
			15.0119	0.0188121	150.497	0.998808
			15.016	0.0188204	150.563	0.999248
			15.0201	0.0188268	150.615	0.99959
			15.0242	0.0188315	150.652	0.999837
			15.0283	0.018834	150.672	0.999971
			15.0324	0.0188345	150.676	1
			15.0364	0.0188333	150.666	0.999932
			15.0405	0.0188301	150.641	0.999764
			15.0446	0.018825	150.6	0.999494
			15.0487	0.0188179	150.543	0.999118
			15.0528	0.0188091	150.472	0.998647
			15.0569	0.0187985	150.388	0.998086
			15.061	0.0187859	150.287	0.997415
			15.0651	0.0187714	150.171	0.996649
			15.0692	0.0187555	150.044	0.995804
			15.0733	0.0187378	149.902	0.994864
			15.0774	0.0187181	149.745	0.993819
			15.0815	0.0186967	149.573	0.99268
			15.0856	0.0186737	149.39	0.99146
			15.0897	0.0186493	149.195	0.990166
			15.0938	0.0186235	148.988	0.988793
			15.0979	0.0185959	148.767	0.98733
			15.102	0.0185667	148.534	0.98578
			15.1061	0.0185359	148.288	0.984146
			15.1102	0.0185036	148.028	0.982427
			15.1143	0.0184696	147.757	0.980625
			15.1183	0.0184343	147.474	0.978748
			15.1224	0.0183976	147.181	0.976802
			15.1265	0.0183596	146.877	0.974785
			15.1306	0.0183202	146.561	0.972689
			15.1347	0.0182793	146.234	0.970519
			15.1388	0.018237	145.896	0.968273
			15.1429	0.0181931	145.545	0.965943
			15.147	0.0181478	145.182	0.963536
			15.1511	0.018101	144.808	0.961056
			15.1552	0.0180529	144.423	0.9585
			15.1593	0.0180034	144.027	0.955873
			15.1634	0.0179528	143.622	0.953183
			15.1675	0.0179009	143.207	0.950428
			15.1716	0.0178477	142.781	0.947603
			15.1757	0.0177933	142.346	0.944715
			15.1798	0.0177377	141.901	0.941763
			15.1839	0.0176809	141.447	0.93875
			15.188	0.0176232	140.985	0.935682
			15.1921	0.0175643	140.514	0.932558
			15.1961	0.0175044	140.035	0.929375
			15.2002	0.0174434	139.547	0.926139
			15.2043	0.0173814	139.051	0.922844
			15.2084	0.0173182	138.546	0.919492
			15.2125	0.017254	138.032	0.916081
			15.2166	0.0171887	137.51	0.912618
			15.2207	0.0171228	136.982	0.909116
			15.2248	0.0170559	136.447	0.905564
			15.2289	0.0169881	135.905	0.901963
			15.233	0.0169196	135.357	0.898327
			15.2371	0.0168501	134.801	0.894639
			15.2412	0.0167797	134.238	0.8909
			15.2453	0.0167088	133.67	0.887134
			15.2494	0.0166373	133.098	0.883339
			15.2535	0.0165651	132.521	0.879504
			15.2576	0.0164921	131.937	0.875632
			15.2617	0.0164185	131.348	0.871724
			15.2658	0.0163444	130.755	0.867788
			15.2699	0.0162696	130.157	0.863816
			15.274	0.0161939	129.551	0.859799
			15.278	0.0161177	128.942	0.855754
			15.2821	0.016041	128.328	0.85168
			15.2862	0.0159635	127.708	0.847563
			15.2903	0.0158852	127.081	0.843406
			15.2944	0.0158063	126.451	0.83922
			15.2985	0.0157271	125.816	0.835012
			15.3026	0.0156473	125.178	0.830775
			15.3067	0.015567	124.536	0.826512
			15.3108	0.0154864	123.891	0.822231
			15.3149	0.0154053	123.243	0.817929
			15.319	0.0153239	122.591	0.813606
			15.3231	0.0152423	121.938	0.809272
			15.3272	0.0151605	121.284	0.80493
			15.3313	0.0150783	120.626	0.800565
			15.3354	0.0149955	119.964	0.79617
			15.3395	0.0149124	119.3	0.791761
			15.3436	0.014829	118.632	0.787328
			15.3477	0.014745	117.96	0.78287
			15.3518	0.0146608	117.286	0.778399
			15.3558	0.0145763	116.611	0.773915
			15.3599	0.0144917	115.934	0.769423
			15.364	0.014407	115.256	0.764924
			15.3681	0.0143219	114.575	0.760408
			15.3722	0.0142365	113.892	0.755873
			15.3763	0.014151	113.208	0.751333
			15.3804	0.0140655	112.524	0.746791
			15.3845	0.0139797	111.838	0.742237
			15.3886	0.0138937	111.15	0.737673
			15.3927	0.0138077	110.462	0.733105
			15.3968	0.0137216	109.773	0.728535
			15.4009	0.0136354	109.083	0.723958
			15.405	0.0135491	108.393	0.719373
			15.4091	0.0134626	107.701	0.714782
			15.4132	0.0133759	107.007	0.71018
			15.4173	0.0132893	106.315	0.705583
			15.4214	0.013203	105.624	0.700998
			15.4255	0.0131165	104.932	0.696408
			15.4296	0.01303	104.24	0.691815
			15.4337	0.0129433	103.547	0.687213
			15.4377	0.0128565	102.852	0.682602
			15.4418	0.0127698	102.158	0.677999
			15.4459	0.0126831	101.465	0.673394
			15.45	0.0125963	100.771	0.668789
			15.4541	0.0125098	100.079	0.664196
			15.4582	0.0124233	99.3862	0.6596
			15.4623	0.0123367	98.6932	0.655001
			15.4664	0.0122501	98.0009	0.650407
			15.4705	0.0121635	97.3083	0.64581
			15.4746	0.012077	96.6158	0.641214
			15.4787	0.0119905	95.9239	0.636622
			15.4828	0.0119042	95.2333	0.632039
			15.4869	0.0118181	94.5447	0.627468
			15.491	0.0117319	93.8556	0.622895
			15.4951	0.0116457	93.1657	0.618317
			15.4992	0.0115599	92.4789	0.613759
			15.5033	0.0114745	91.796	0.609226
			15.5074	0.0113893	91.1144	0.604702
			15.5115	0.0113042	90.4336	0.600185
			15.5155	0.0112194	89.7556	0.595685
			15.5196	0.011135	89.08	0.591201
			15.5237	0.0110509	88.4071	0.586735
			15.5278	0.0109672	87.7375	0.582291
			15.5319	0.0108835	87.0683	0.57785
			15.536	0.0107998	86.3983	0.573403
			15.5401	0.0107163	85.7302	0.568969
			15.5442	0.0106332	85.0656	0.564558
			15.5483	0.0105504	84.4035	0.560165
			15.5524	0.0104678	83.7424	0.555777
			15.5565	0.0103853	83.0826	0.551398
			15.5606	0.0103033	82.4262	0.547042
			15.5647	0.0102217	81.7736	0.54271
			15.5688	0.0101404	81.1231	0.538393
			15.5729	0.0100592	80.4739	0.534085
			15.577	0.00997843	79.8274	0.529794
			15.5811	0.00989807	79.1846	0.525527
			15.5852	0.00981821	78.5457	0.521287
			15.5893	0.00973893	77.9114	0.517078
			15.5934	0.00966006	77.2805	0.51289
			15.5974	0.00958143	76.6514	0.508716
			15.6015	0.00950301	76.0241	0.504552
			15.6056	0.00942494	75.3995	0.500407
			15.6097	0.00934738	74.779	0.496289
			15.6138	0.00927023	74.1618	0.492193
			15.6179	0.00919342	73.5473	0.488115
			15.622	0.00911675	72.934	0.484044
			15.6261	0.00904008	72.3206	0.479973
			15.6302	0.00896359	71.7087	0.475912
			15.6343	0.00888743	71.0994	0.471869
			15.6384	0.00881157	70.4926	0.467841
			15.6425	0.00873607	69.8886	0.463833
			15.6466	0.00866099	69.2879	0.459846
			15.6507	0.0085864	68.6912	0.455886
			15.6548	0.00851229	68.0983	0.451951
			15.6589	0.00843854	67.5083	0.448035
			15.663	0.0083653	66.9224	0.444146
			15.6671	0.00829265	66.3412	0.44029
			15.6712	0.00822054	65.7643	0.436461
			15.6753	0.00814879	65.1903	0.432651
			15.6793	0.00807735	64.6188	0.428858
			15.6834	0.00800635	64.0508	0.425089
			15.6875	0.00793576	63.4861	0.421341
			15.6916	0.0078657	62.9256	0.417621
			15.6957	0.00779619	62.3695	0.41393
			15.6998	0.00772707	61.8166	0.410261
			15.7039	0.00765828	61.2663	0.406608
			15.708	0.00758984	60.7187	0.402975
			15.7121	0.0075219	60.1752	0.399367
			15.7162	0.00745442	59.6354	0.395785
			15.7203	0.00738739	59.0991	0.392226
			15.7244	0.00732066	58.5653	0.388683
			15.7285	0.00725417	58.0334	0.385153
			15.7326	0.00718811	57.5049	0.381645
			15.7367	0.00712242	56.9794	0.378157
			15.7408	0.00705703	56.4562	0.374685
			15.7449	0.00699211	55.9369	0.371239
			15.749	0.00692784	55.4227	0.367826
			15.7531	0.00686421	54.9137	0.364448
			15.7571	0.00680107	54.4085	0.361095
			15.7612	0.00673817	53.9053	0.357756
			15.7653	0.0066756	53.4048	0.354434
			15.7694	0.00661358	52.9087	0.351141
			15.7735	0.00655207	52.4166	0.347875
			15.7776	0.00649084	51.9267	0.344624
			15.7817	0.00642977	51.4381	0.341382
			15.7858	0.00636896	50.9517	0.338153
			15.7899	0.00630863	50.4691	0.33495
			15.794	0.00624892	49.9914	0.33178
			15.7981	0.00618974	49.5179	0.328638
			15.8022	0.00613097	49.0478	0.325518
			15.8063	0.00607251	48.5801	0.322413
			15.8104	0.00601433	48.1146	0.319324
			15.8145	0.00595662	47.653	0.316261
			15.8186	0.00589939	47.1951	0.313222
			15.8227	0.00584253	46.7403	0.310203
			15.8268	0.0057859	46.2872	0.307196
			15.8309	0.00572963	45.837	0.304209
			15.835	0.00567385	45.3908	0.301247
			15.839	0.00561843	44.9474	0.298304
			15.8431	0.00556329	44.5063	0.295377
			15.8472	0.00550828	44.0662	0.292456
			15.8513	0.00545371	43.6297	0.289559
			15.8554	0.00539999	43.1999	0.286707
			15.8595	0.00534674	42.7739	0.283879
			15.8636	0.00529354	42.3483	0.281055
			15.8677	0.00524075	41.926	0.278252
			15.8718	0.00518865	41.5092	0.275486
			15.8759	0.00513692	41.0953	0.272739
			15.88	0.00508559	40.6847	0.270014
			15.8841	0.00503496	40.2797	0.267326
			15.8882	0.00498477	39.8781	0.264661
			15.8923	0.00493475	39.478	0.262005
			15.8964	0.0048851	39.0808	0.259369
			15.9005	0.00483587	38.687	0.256755
			15.9046	0.00478684	38.2948	0.254152
			15.9087	0.00473844	37.9075	0.251583
			15.9128	0.00469064	37.5251	0.249044
			15.9168	0.00464286	37.1429	0.246508
			15.9209	0.00459545	36.7636	0.243991
			15.925	0.00454841	36.3873	0.241493
			15.9291	0.00450138	36.011	0.238996
			15.9332	0.00445493	35.6395	0.23653
			15.9373	0.00440917	35.2733	0.2341
			15.9414	0.00436386	34.9109	0.231695
			15.9455	0.00431924	34.5539	0.229325
			15.9496	0.00427492	34.1993	0.226972
			15.9537	0.00423091	33.8473	0.224636
			15.9578	0.00418734	33.4988	0.222323
			15.9619	0.00414422	33.1538	0.220033
			15.966	0.0041015	32.812	0.217765
			15.9701	0.00405897	32.4718	0.215507
			15.9742	0.00401693	32.1354	0.213274
			15.9783	0.00397529	31.8023	0.211064
			15.9824	0.00393405	31.4724	0.208874
			15.9865	0.00389322	31.1458	0.206707
			15.9906	0.00385272	30.8218	0.204556
			15.9947	0.00381258	30.5007	0.202425
			15.9987	0.00377273	30.1818	0.200309
			16.0028	0.00373324	29.8659	0.198213
			16.0069	0.00369392	29.5513	0.196125
			16.011	0.00365488	29.239	0.194052
			16.0151	0.00361623	28.9298	0.192
			16.0192	0.00357796	28.6237	0.189968
			16.0233	0.00354002	28.3201	0.187953
			16.0274	0.00350237	28.0189	0.185954
			16.0315	0.00346503	27.7203	0.183972
			16.0356	0.003428	27.424	0.182006
			16.0397	0.00339138	27.1311	0.180062
			16.0438	0.00335516	26.8413	0.178139
			16.0479	0.00331929	26.5543	0.176234
			16.052	0.00328388	26.271	0.174354
			16.0561	0.00324875	25.99	0.172489
			16.0602	0.00321392	25.7114	0.17064
			16.0643	0.00317936	25.4349	0.168805
			16.0684	0.00314511	25.1609	0.166986
			16.0725	0.0031112	24.8896	0.165186
			16.0766	0.00307764	24.6211	0.163404
			16.0806	0.00304445	24.3556	0.161642
			16.0847	0.00301159	24.0927	0.159897
			16.0888	0.00297916	23.8332	0.158175
			16.0929	0.00294699	23.576	0.156468
			16.097	0.00291528	23.3222	0.154784
			16.1011	0.00288376	23.0701	0.15311
			16.1052	0.00285245	22.8196	0.151448
			16.1093	0.00282149	22.5719	0.149804
			16.1134	0.00279084	22.3267	0.148177
			16.1175	0.00276063	22.085	0.146573
			16.1216	0.00273045	21.8436	0.14497
			16.1257	0.00270053	21.6042	0.143382
			16.1298	0.00267082	21.3666	0.141805
			16.1339	0.00264146	21.1317	0.140246
			16.138	0.00261268	20.9015	0.138718
			16.1421	0.00258386	20.6709	0.137187
			16.1462	0.0025554	20.4432	0.135676
			16.1503	0.00252739	20.2191	0.134189
			16.1544	0.00249958	19.9966	0.132712
			16.1584	0.00247219	19.7775	0.131258
			16.1625	0.00244472	19.5578	0.1298
			16.1666	0.00241765	19.3412	0.128362
			16.1707	0.00239127	19.1302	0.126962
			16.1748	0.00236469	18.9175	0.125551
			16.1789	0.00233839	18.7071	0.124154
			16.183	0.00231258	18.5007	0.122784
			16.1871	0.00228657	18.2925	0.121403
			16.1912	0.00226113	18.089	0.120052
			16.1953	0.00223637	17.891	0.118738
			16.1994	0.00221132	17.6905	0.117407
			16.2035	0.00218637	17.4909	0.116083
			16.2076	0.002162	17.296	0.114789
			16.2117	0.00213779	17.1023	0.113504
			16.2158	0.00211387	16.911	0.112234
			16.2199	0.0020906	16.7248	0.110998
			16.224	0.00206698	16.5358	0.109744
			16.2281	0.00204352	16.3482	0.108498
			16.2322	0.00202087	16.167	0.107296
			16.2363	0.00199826	15.9861	0.106095
			16.2403	0.00197547	15.8037	0.104885
			16.2444	0.00195338	15.627	0.103712
			16.2485	0.0019318	15.4544	0.102567
			16.2526	0.00190971	15.2776	0.101394
			16.2567	0.00188769	15.1015	0.100225
			16.2608	0.00186654	14.9324	0.0991022
			16.2649	0.00184565	14.7652	0.0979929
			16.269	0.0018245	14.596	0.0968699
			16.2731	0.00180396	14.4317	0.0957795
			16.2772	0.00178406	14.2725	0.0947229
			16.2813	0.00176384	14.1107	0.093649
			16.2854	0.00174352	13.9482	0.0925703
			16.2895	0.00172378	13.7903	0.0915224
			16.2936	0.00170449	13.6359	0.0904981
			16.2977	0.00168515	13.4812	0.0894711
			16.3018	0.00166565	13.3252	0.088436
			16.3059	0.00164701	13.176	0.087446
			16.31	0.00162886	13.0309	0.0864826
			16.3141	0.00161026	12.8821	0.0854949
			16.3181	0.00159149	12.7319	0.0844985
			16.3222	0.0015735	12.588	0.0835431
			16.3263	0.00155612	12.449	0.0826207
			16.3304	0.00153846	12.3077	0.081683
			16.3345	0.0015204	12.1632	0.0807242
			16.3386	0.00150284	12.0227	0.0797916
			16.3427	0.0014862	11.8896	0.0789082
			16.3468	0.00146973	11.7578	0.0780338
			16.3509	0.00145248	11.6198	0.0771177
			16.355	0.00143524	11.4819	0.0762025
			16.3591	0.00141896	11.3517	0.075338
			16.3632	0.00140331	11.2265	0.0745074
			16.3673	0.00138743	11.0994	0.0736642
			16.3714	0.00137096	10.9677	0.0727898
			16.3755	0.00135477	10.8381	0.0719299
			16.3796	0.00133945	10.7156	0.0711165
			16.3837	0.00132473	10.5978	0.0703349
			16.3878	0.00130977	10.4782	0.0695408
			16.3919	0.00129415	10.3532	0.0687113
			16.396	0.00127871	10.2297	0.0678918
			16.4	0.00126396	10.1117	0.0671087
			16.4041	0.00124961	9.99691	0.0663469
			16.4082	0.00123547	9.88375	0.0655959
			16.4123	0.0012209	9.76717	0.0648222
			16.4164	0.00120609	9.64872	0.0640361
			16.4205	0.00119209	9.5367	0.0632926
			16.4246	0.00117886	9.43091	0.0625905
			16.4287	0.00116603	9.32824	0.0619091
			16.4328	0.00115273	9.22182	0.0612029
			16.4369	0.00113878	9.11021	0.0604621
			16.441	0.00112505	9.00038	0.0597332
			16.4451	0.00111209	8.89668	0.059045
			16.4492	0.00109985	8.7988	0.0583954
			16.4533	0.00108823	8.70585	0.0577785
			16.4574	0.00107645	8.61156	0.0571527
			16.4615	0.0010636	8.50877	0.0564705
			16.4656	0.00105046	8.40372	0.0557733
			16.4697	0.00103806	8.30451	0.0551149
			16.4738	0.00102638	8.21106	0.0544947
			16.4778	0.00101522	8.12175	0.053902
			16.4819	0.00100433	8.03467	0.053324
			16.486	0.000993148	7.94518	0.0527301
			16.4901	0.000981148	7.84918	0.052093
			16.4942	0.000969212	7.75369	0.0514593
			16.4983	0.00095794	7.66352	0.0508608
			16.5024	0.000947229	7.57783	0.0502921
			16.5065	0.000936965	7.49572	0.0497472
			16.5106	0.000927047	7.41637	0.0492205
			16.5147	0.000916754	7.33403	0.0486741
			16.5188	0.000905534	7.24427	0.0480783
			16.5229	0.000894281	7.15425	0.0474809
			16.527	0.000883648	7.06918	0.0469164
			16.5311	0.00087362	6.98896	0.0463839
			16.5352	0.000864129	6.91303	0.04588
			16.5393	0.000855091	6.84073	0.0454002
			16.5434	0.000846431	6.77145	0.0449403
			16.5475	0.000837392	6.69913	0.0444604
			16.5516	0.000827238	6.61791	0.0439213
			16.5557	0.000816863	6.5349	0.0433705
			16.5597	0.000807064	6.45651	0.0428502
			16.5638	0.000797816	6.38253	0.0423592
			16.5679	0.000789085	6.31268	0.0418956
			16.572	0.000780726	6.24581	0.0414518
			16.5761	0.000772555	6.18044	0.041018
			16.5802	0.000764441	6.11553	0.0405872
			16.5843	0.000755724	6.04579	0.0401243
			16.5884	0.000746192	5.96954	0.0396183
			16.5925	0.000736825	5.8946	0.0391209
			16.5966	0.000727985	5.82388	0.0386516
			16.6007	0.000719645	5.75716	0.0382088
			16.6048	0.000711776	5.69421	0.037791
			16.6089	0.000704315	5.63452	0.0373949
			16.613	0.00069719	5.57752	0.0370165
			16.6171	0.000690333	5.52266	0.0366525
			16.6212	0.000683014	5.46411	0.0362639
			16.6253	0.000674488	5.3959	0.0358112
			16.6294	0.00066563	5.32504	0.0353409
			16.6335	0.000657265	5.25812	0.0348968
			16.6376	0.000649359	5.19487	0.034477
			16.6416	0.000641892	5.13514	0.0340806
			16.6457	0.000634874	5.07899	0.033708
			16.6498	0.00062828	5.02624	0.0333579
			16.6539	0.000622062	4.97649	0.0330277
			16.658	0.000616193	4.92954	0.0327161
			16.6621	0.000610654	4.88523	0.032422
			16.6662	0.000605425	4.8434	0.0321444
			16.6703	0.00059978	4.79824	0.0318447
			16.6744	0.000592706	4.74165	0.0314691
			16.6785	0.000585	4.68	0.03106
			16.6826	0.000577737	4.6219	0.0306743
			16.6867	0.000570881	4.56704	0.0303103
			16.6908	0.000564405	4.51524	0.0299665
			16.6949	0.000558287	4.46629	0.0296416
			16.699	0.000552503	4.42003	0.0293346
			16.7031	0.000547019	4.37615	0.0290434
			16.7072	0.000541826	4.33461	0.0287677
			16.7113	0.000536826	4.29461	0.0285022
			16.7154	0.000531854	4.25483	0.0282382
			16.7194	0.0005268	4.2144	0.0279699
			16.7235	0.000520992	4.16794	0.0276615
			16.7276	0.000514178	4.11343	0.0272997
			16.7317	0.000507331	4.05865	0.0269362
			16.7358	0.000500844	4.00675	0.0265918
			16.7399	0.000494746	3.95797	0.026268
			16.744	0.000489023	3.91218	0.0259641
			16.7481	0.00048364	3.86912	0.0256784
			16.7522	0.00047856	3.82848	0.0254086
			16.7563	0.000473762	3.7901	0.0251539
			16.7604	0.000469231	3.75385	0.0249133
			16.7645	0.000464951	3.71961	0.0246861
			16.7686	0.000460904	3.68723	0.0244712
			16.7727	0.000457068	3.65654	0.0242675
			16.7768	0.000453412	3.6273	0.0240734
			16.7809	0.000449919	3.59935	0.023888
			16.785	0.000446263	3.57011	0.0236939
			16.7891	0.000441972	3.53578	0.023466
			16.7932	0.000436737	3.49389	0.0231881
			16.7973	0.000430794	3.44635	0.0228725
			16.8013	0.000425176	3.40141	0.0225743
			16.8054	0.000419869	3.35895	0.0222925
			16.8095	0.000414861	3.31889	0.0220266
			16.8136	0.000410126	3.28101	0.0217752
			16.8177	0.000405655	3.24524	0.0215378
			16.8218	0.000401455	3.21164	0.0213148
			16.8259	0.000397498	3.17999	0.0211047
			16.83	0.00039376	3.15008	0.0209063
			16.8341	0.000390215	3.12172	0.0207181
			16.8382	0.000386851	3.09481	0.0205395
			16.8423	0.00038367	3.06936	0.0203706
			16.8464	0.000380679	3.04543	0.0202117
			16.8505	0.000377863	3.0229	0.0200622
			16.8546	0.00037521	3.00168	0.0199214
			16.8587	0.000372705	2.98164	0.0197883
			16.8628	0.000370336	2.96269	0.0196626
			16.8669	0.000367977	2.94382	0.0195373
			16.871	0.000364858	2.91887	0.0193718
			16.8751	0.000360295	2.88236	0.0191295
			16.8791	0.000355143	2.84114	0.0188559
			16.8832	0.000350255	2.80204	0.0185964
			16.8873	0.000345646	2.76517	0.0183517
			16.8914	0.000341347	2.73077	0.0181234
			16.8955	0.000337304	2.69843	0.0179088
			16.8996	0.000333487	2.6679	0.0177061
			16.9037	0.000329866	2.63893	0.0175139
			16.9078	0.000326432	2.61146	0.0173316
			16.9119	0.000323183	2.58547	0.0171591
			16.916	0.000320116	2.56093	0.0169962
			16.9201	0.000317232	2.53786	0.0168431
			16.9242	0.000314523	2.51618	0.0166993
			16.9283	0.000311964	2.49571	0.0165634
			16.9324	0.000309542	2.47633	0.0164348
			16.9365	0.00030726	2.45808	0.0163136
			16.9406	0.000305119	2.44095	0.0162
			16.9447	0.000303101	2.42481	0.0160928
			16.9488	0.000301195	2.40956	0.0159917
			16.9529	0.000299378	2.39503	0.0158952
			16.957	0.000297645	2.38116	0.0158032
			16.961	0.000296038	2.3683	0.0157178
			16.9651	0.000294546	2.35636	0.0156386
			16.9692	0.000293141	2.34512	0.015564
			16.9733	0.000291807	2.33445	0.0154932
			16.9774	0.000290529	2.32423	0.0154253
			16.9815	0.000288705	2.30964	0.0153285
			16.9856	0.000285401	2.28321	0.0151531
			16.9897	0.000281088	2.24871	0.0149241
			16.9938	0.000276792	2.21434	0.014696
			16.9979	0.000272755	2.18204	0.0144816
			17.002	0.000268956	2.15165	0.0142799
			17.0061	0.000265376	2.12301	0.0140899
			17.0102	0.000262006	2.09605	0.0139109
			17.0143	0.000258851	2.07081	0.0137434
			17.0184	0.000255897	2.04717	0.0135866
			17.0225	0.000253105	2.02484	0.0134383
			17.0266	0.000250465	2.00372	0.0132982
			17.0307	0.000247975	1.9838	0.013166
			17.0348	0.000245633	1.96507	0.0130416
			17.0389	0.000243425	1.9474	0.0129244
			17.0429	0.000241337	1.93069	0.0128135
			17.047	0.000239356	1.91485	0.0127083
			17.0511	0.000237482	1.89986	0.0126088
			17.0552	0.000235727	1.88582	0.0125157
			17.0593	0.00023409	1.87272	0.0124288
			17.0634	0.000232575	1.8606	0.0123483
			17.0675	0.000231181	1.84945	0.0122743
			17.0716	0.000229866	1.83893	0.0122045
			17.0757	0.000228622	1.82897	0.0121384
			17.0798	0.000227428	1.81942	0.012075
			17.0839	0.000226272	1.81018	0.0120137
			17.088	0.000225176	1.80141	0.0119555
			17.0921	0.000224135	1.79308	0.0119002
			17.0962	0.000223136	1.78509	0.0118472
			17.1003	0.000222196	1.77757	0.0117973
			17.1044	0.00022135	1.7708	0.0117523
			17.1085	0.000220564	1.76452	0.0117106
			17.1126	0.00021982	1.75856	0.0116711
			17.1167	0.00021911	1.75288	0.0116334
			17.1207	0.000218429	1.74743	0.0115972
			17.1248	0.000217776	1.74221	0.0115626
			17.1289	0.000217135	1.73708	0.0115286
			17.133	0.000216505	1.73204	0.0114951
			17.1371	0.000215783	1.72626	0.0114568
			17.1412	0.000214786	1.71829	0.0114038
			17.1453	0.000213382	1.70706	0.0113293
			17.1494	0.000210931	1.68745	0.0111991
			17.1535	0.000207401	1.65921	0.0110117
			17.1576	0.000203831	1.63065	0.0108222
			17.1617	0.000200447	1.60358	0.0106425
			17.1658	0.000197245	1.57796	0.0104725
			17.1699	0.000194249	1.55399	0.0103134
			17.174	0.000191463	1.5317	0.0101655
			17.1781	0.000188838	1.5107	0.0100261
			17.1822	0.000186351	1.49081	0.00989412
			17.1863	0.000183991	1.47192	0.00976878
			17.1904	0.000181746	1.45397	0.00964964
			17.1945	0.000179619	1.43695	0.00953667
			17.1986	0.0001776	1.4208	0.00942946
			17.2026	0.0001757	1.4056	0.00932862
			17.2067	0.000173925	1.3914	0.00923437
			17.2108	0.000172248	1.37798	0.00914533
			17.2149	0.000170661	1.36529	0.00906107
			17.219	0.000169143	1.35314	0.00898046
			17.2231	0.000167675	1.3414	0.00890254
			17.2272	0.000166272	1.33018	0.00882804
			17.2313	0.000164931	1.31945	0.00875685
			17.2354	0.000163658	1.30926	0.00868922
			17.2395	0.000162476	1.29981	0.00862649
			17.2436	0.000161376	1.29101	0.00856809
			17.2477	0.000160343	1.28274	0.00851324
			17.2518	0.000159384	1.27507	0.00846232
			17.2559	0.000158499	1.26799	0.00841531
			17.26	0.000157664	1.26131	0.008371
			17.2641	0.000156873	1.25498	0.00832901
			17.2682	0.000156119	1.24895	0.00828895
			17.2723	0.000155413	1.24331	0.00825151
			17.2764	0.00015477	1.23816	0.00821737
			17.2804	0.000154177	1.23342	0.00818588
			17.2845	0.000153626	1.22901	0.00815663
			17.2886	0.000153105	1.22484	0.00812893
			17.2927	0.000152604	1.22083	0.00810235
			17.2968	0.00015212	1.21696	0.00807666
			17.3009	0.000151648	1.21318	0.00805157
			17.305	0.000151179	1.20943	0.00802669
			17.3091	0.000150728	1.20583	0.00800276
			17.3132	0.000150325	1.2026	0.00798132
			17.3173	0.000149952	1.19962	0.00796156
			17.3214	0.000149602	1.19682	0.00794298
			17.3255	0.000149271	1.19417	0.00792537
			17.3296	0.000148949	1.19159	0.00790828
			17.3337	0.000148625	1.189	0.0078911
			17.3378	0.000148291	1.18633	0.00787336
			17.3419	0.000147954	1.18363	0.00785548
			17.346	0.000147646	1.18117	0.00783911
			17.3501	0.000147366	1.17893	0.00782423
			17.3542	0.000147106	1.17685	0.00781045
			17.3583	0.000146877	1.17502	0.00779828
			17.3623	0.000146689	1.17351	0.00778828
			17.3664	0.00014652	1.17216	0.00777932
			17.3705	0.000146349	1.17079	0.00777024
			17.3746	0.000146171	1.16937	0.00776078
			17.3787	0.000145981	1.16785	0.00775072
			17.3828	0.000145799	1.16639	0.00774104
			17.3869	0.000145636	1.16509	0.00773239
			17.391	0.000145481	1.16384	0.00772414
			17.3951	0.000145323	1.16258	0.00771575
			17.3992	0.000145156	1.16125	0.00770689
			17.4033	0.000144997	1.15998	0.00769847
			17.4074	0.000144856	1.15885	0.00769099
			17.4115	0.000144732	1.15786	0.00768442
			17.4156	0.000144636	1.15709	0.00767932
			17.4197	0.000144568	1.15654	0.00767567
			17.4238	0.000144485	1.15588	0.00767127
			17.4279	0.000144378	1.15502	0.00766559
			17.432	0.000144276	1.15421	0.0076602
			17.4361	0.000144185	1.15348	0.00765534
			17.4401	0.000144092	1.15273	0.0076504
			17.4442	0.000143993	1.15195	0.00764518
			17.4483	0.000143864	1.15091	0.00763831
			17.4524	0.000143702	1.14962	0.00762972
			17.4565	0.000143546	1.14836	0.0076214
			17.4606	0.000143404	1.14723	0.00761386
			17.4647	0.000143282	1.14626	0.00760742
			17.4688	0.00014317	1.14536	0.00760144
			17.4729	0.000143064	1.14451	0.00759583
			17.477	0.000142967	1.14374	0.0075907
			17.4811	0.000142881	1.14305	0.00758611
			17.4852	0.0001428	1.1424	0.0075818
			17.4893	0.000142722	1.14177	0.00757765
			17.4934	0.000142645	1.14116	0.00757356
			17.4975	0.000142562	1.1405	0.00756919
			17.5016	0.000142465	1.13972	0.007564
			17.5057	0.000142348	1.13878	0.00755782
			17.5098	0.000142219	1.13775	0.00755094
			17.5139	0.000141375	1.131	0.00750618
			17.518	0.00013892	1.11136	0.00737579
			17.522	0.000135691	1.08553	0.00720437
			17.5261	0.000132649	1.06119	0.00704284
			17.5302	0.000129775	1.0382	0.00689028
			17.5343	0.000127052	1.01642	0.0067457
			17.5384	0.000124442	0.995538	0.00660713
			17.5425	0.000121937	0.975494	0.0064741
			17.5466	0.000119571	0.956568	0.0063485
			17.5507	0.000117351	0.93881	0.00623064
			17.5548	0.000115266	0.922132	0.00611995
			17.5589	0.000113312	0.906497	0.00601619
			17.563	0.000111485	0.891879	0.00591917
			17.5671	0.000109761	0.878091	0.00582767
			17.5712	0.000108124	0.864994	0.00574074
			17.5753	0.00010656	0.852477	0.00565767
			17.5794	0.000105062	0.840496	0.00557816
			17.5835	0.000103617	0.828939	0.00550146
			17.5876	0.000102211	0.817691	0.0054268
			17.5917	0.00010089	0.807116	0.00535662
			17.5958	9.96539e-05	0.797232	0.00529102
			17.5999	9.84935e-05	0.787948	0.00522941
			17.6039	9.74016e-05	0.779213	0.00517143
			17.608	9.63815e-05	0.771052	0.00511728
			17.6121	9.54323e-05	0.763458	0.00506688
			17.6162	9.45319e-05	0.756255	0.00501907
			17.6203	9.36719e-05	0.749375	0.00497341
			17.6244	9.28473e-05	0.742779	0.00492963
			17.6285	9.20642e-05	0.736514	0.00488805
			17.6326	9.13178e-05	0.730542	0.00484842
			17.6367	9.06104e-05	0.724883	0.00481086
			17.6408	8.99511e-05	0.719609	0.00477586
			17.6449	8.93275e-05	0.71462	0.00474275
			17.649	8.87234e-05	0.709788	0.00471068
			17.6531	8.81274e-05	0.705019	0.00467903
			17.6572	8.75185e-05	0.700148	0.0046467
			17.6613	8.69429e-05	0.695543	0.00461614
			17.6654	8.64591e-05	0.691672	0.00459045
			17.6695	8.60312e-05	0.68825	0.00456774
			17.6736	8.56397e-05	0.685118	0.00454695
			17.6777	8.52725e-05	0.68218	0.00452745
			17.6817	8.49234e-05	0.679387	0.00450892
			17.6858	8.45848e-05	0.676678	0.00449094
			17.6899	8.42504e-05	0.674004	0.00447319
			17.694	8.39046e-05	0.671236	0.00445482
			17.6981	8.35711e-05	0.668568	0.00443712
			17.7022	8.32833e-05	0.666267	0.00442184
			17.7063	8.3016e-05	0.664128	0.00440764
			17.7104	8.27631e-05	0.662104	0.00439422
			17.7145	8.25223e-05	0.660178	0.00438143
			17.7186	8.22908e-05	0.658326	0.00436914
			17.7227	8.20623e-05	0.656498	0.00435701
			17.7268	8.18374e-05	0.654699	0.00434507
			17.7309	8.16357e-05	0.653086	0.00433436
			17.735	8.14602e-05	0.651682	0.00432504
			17.7391	8.13015e-05	0.650412	0.00431662
			17.7432	8.1158e-05	0.649264	0.004309
			17.7473	8.10218e-05	0.648174	0.00430177
			17.7514	8.08831e-05	0.647065	0.0042944
			17.7555	8.07375e-05	0.6459	0.00428667
			17.7596	8.0568e-05	0.644544	0.00427767
			17.7636	8.03892e-05	0.643113	0.00426818
			17.7677	8.02469e-05	0.641975	0.00426063
			17.7718	8.01337e-05	0.64107	0.00425461
			17.7759	8.00263e-05	0.64021	0.00424891
			17.78	7.99161e-05	0.639329	0.00424306
			17.7841	7.98078e-05	0.638463	0.00423731
			17.7882	7.97062e-05	0.63765	0.00423192
			17.7923	7.96088e-05	0.63687	0.00422674
			17.7964	7.95125e-05	0.6361	0.00422163
			17.8005	7.9427e-05	0.635416	0.00421709
			17.8046	7.93762e-05	0.635009	0.00421439
			17.8087	7.93487e-05	0.634789	0.00421293
			17.8128	7.9321e-05	0.634568	0.00421146
			17.8169	7.92903e-05	0.634322	0.00420983
			17.821	7.9252e-05	0.634016	0.0042078
			17.8251	7.92058e-05	0.633647	0.00420535
			17.8292	7.91258e-05	0.633006	0.0042011
			17.8333	7.89937e-05	0.63195	0.00419409
			17.8374	7.88673e-05	0.630938	0.00418737
			17.8414	7.87797e-05	0.630237	0.00418272
			17.8455	7.87106e-05	0.629685	0.00417905
			17.8496	7.86517e-05	0.629213	0.00417593
			17.8537	7.86023e-05	0.628818	0.0041733
			17.8578	7.85528e-05	0.628422	0.00417068
			17.8619	7.85e-05	0.628	0.00416787
			17.866	7.84207e-05	0.627365	0.00416366
			17.8701	7.83306e-05	0.626645	0.00415888
			17.8742	7.82793e-05	0.626235	0.00415616
			17.8783	7.82445e-05	0.625956	0.00415431
			17.8824	7.82167e-05	0.625733	0.00415283
			17.8865	7.81864e-05	0.625491	0.00415122
			17.8906	7.81454e-05	0.625163	0.00414904
			17.8947	7.80988e-05	0.624791	0.00414657
			17.8988	7.8054e-05	0.624432	0.00414419
			17.9029	7.7991e-05	0.623928	0.00414085
			17.907	7.79389e-05	0.623511	0.00413808
			17.9111	7.79432e-05	0.623546	0.00413831
			17.9152	7.79464e-05	0.623572	0.00413848
			17.9193	7.7945e-05	0.62356	0.00413841
			17.9233	7.79316e-05	0.623452	0.00413769
			17.9274	7.79035e-05	0.623228	0.0041362
			17.9315	7.78735e-05	0.622988	0.00413461
			17.9356	7.78357e-05	0.622686	0.0041326
			17.9397	7.77972e-05	0.622377	0.00413056
			17.9438	7.77737e-05	0.622189	0.00412931
			17.9479	7.77554e-05	0.622043	0.00412834
			17.952	7.77521e-05	0.622017	0.00412817
			17.9561	7.77668e-05	0.622134	0.00412894
			17.9602	7.77815e-05	0.622252	0.00412973
			17.9643	7.77894e-05	0.622315	0.00413015
			17.9684	7.77828e-05	0.622262	0.0041298
			17.9725	7.77619e-05	0.622095	0.00412868
			17.9766	7.77335e-05	0.621868	0.00412718
			17.9807	7.77075e-05	0.62166	0.0041258
			17.9848	7.76786e-05	0.621428	0.00412426
			17.9889	7.76408e-05	0.621127	0.00412226
			17.993	7.75907e-05	0.620726	0.0041196
			17.9971	7.7525e-05	0.6202	0.00411611
			18.0011	7.7472e-05	0.619776	0.0041133
			18.0052	7.74543e-05	0.619634	0.00411235
			18.0093	7.7447e-05	0.619576	0.00411196
			18.0134	7.74521e-05	0.619617	0.00411224
			18.0175	7.74679e-05	0.619743	0.00411308
			18.0216	7.74748e-05	0.619799	0.00411344
			18.0257	7.74705e-05	0.619764	0.00411321
			18.0298	7.7457e-05	0.619656	0.0041125
			18.0339	7.74433e-05	0.619547	0.00411177
			18.038	7.74295e-05	0.619436	0.00411104
			18.0421	7.74082e-05	0.619265	0.0041099
			18.0462	7.73784e-05	0.619027	0.00410832
			18.0503	7.73555e-05	0.618844	0.00410711
			18.0544	7.7338e-05	0.618704	0.00410618
			18.0585	7.73206e-05	0.618565	0.00410526
			18.0626	7.73016e-05	0.618413	0.00410425
			18.0667	7.72911e-05	0.618329	0.00410369
			18.0708	7.72959e-05	0.618367	0.00410395
			18.0749	7.72842e-05	0.618274	0.00410332
			18.079	7.72272e-05	0.617817	0.00410029
			18.083	7.71612e-05	0.617289	0.00409679
			18.0871	7.712e-05	0.61696	0.0040946
			18.0912	7.70792e-05	0.616633	0.00409244
			18.0953	7.70347e-05	0.616278	0.00409008
			18.0994	7.69769e-05	0.615815	0.00408701
			18.1035	7.69195e-05	0.615356	0.00408396
			18.1076	7.68904e-05	0.615123	0.00408241
			18.1117	7.68785e-05	0.615028	0.00408178
			18.1158	7.68682e-05	0.614945	0.00408123
			18.1199	7.6873e-05	0.614984	0.00408149
			18.124	7.68972e-05	0.615177	0.00408277
			18.1281	7.69177e-05	0.615342	0.00408387
			18.1322	7.6929e-05	0.615432	0.00408447
			18.1363	7.69259e-05	0.615407	0.0040843
			18.1404	7.69215e-05	0.615372	0.00408407
			18.1445	7.6928e-05	0.615424	0.00408441
			18.1486	7.69405e-05	0.615524	0.00408507
			18.1527	7.69725e-05	0.61578	0.00408677
			18.1568	7.70403e-05	0.616322	0.00409037
			18.1609	7.71194e-05	0.616955	0.00409457
			18.1649	7.71889e-05	0.617511	0.00409826
			18.169	7.72319e-05	0.617855	0.00410054
			18.1731	7.72604e-05	0.618083	0.00410206
			18.1772	7.72863e-05	0.61829	0.00410343
			18.1813	7.73036e-05	0.618429	0.00410435
			18.1854	7.73006e-05	0.618405	0.00410419
			18.1895	7.72747e-05	0.618197	0.00410282
			18.1936	7.72475e-05	0.61798	0.00410137
			18.1977	7.72183e-05	0.617746	0.00409982
			18.2018	7.71931e-05	0.617545	0.00409849
			18.2059	7.71779e-05	0.617423	0.00409768
			18.21	7.71627e-05	0.617302	0.00409687
			18.2141	7.71444e-05	0.617155	0.0040959
			18.2182	7.71208e-05	0.616967	0.00409465
			18.2223	7.71027e-05	0.616822	0.00409369
			18.2264	7.71042e-05	0.616833	0.00409376
			18.2305	7.71069e-05	0.616855	0.00409391
			18.2346	7.70968e-05	0.616774	0.00409337
			18.2387	7.70569e-05	0.616455	0.00409126
			18.2427	7.69798e-05	0.615839	0.00408716
			18.2468	7.69043e-05	0.615234	0.00408315
			18.2509	7.6849e-05	0.614792	0.00408021
			18.255	7.68222e-05	0.614578	0.00407879
			18.2591	7.68248e-05	0.614598	0.00407893
			18.2632	7.68384e-05	0.614708	0.00407966
			18.2673	7.68542e-05	0.614833	0.00408049
			18.2714	7.68596e-05	0.614877	0.00408078
			18.2755	7.68505e-05	0.614804	0.0040803
			18.2796	7.68242e-05	0.614594	0.0040789
			18.2837	7.67924e-05	0.61434	0.00407721
			18.2878	7.67639e-05	0.614111	0.0040757
			18.2919	7.67525e-05	0.61402	0.00407509
			18.296	7.67699e-05	0.614159	0.00407602
			18.3001	7.67968e-05	0.614375	0.00407745
			18.3042	7.68188e-05	0.61455	0.00407861
			18.3083	7.6831e-05	0.614648	0.00407926
			18.3124	7.68137e-05	0.61451	0.00407834
			18.3165	7.67591e-05	0.614073	0.00407544
			18.3206	7.66962e-05	0.61357	0.00407211
			18.3246	7.66432e-05	0.613145	0.00406929
			18.3287	7.66246e-05	0.612997	0.0040683
			18.3328	7.66235e-05	0.612988	0.00406824
			18.3369	7.66215e-05	0.612972	0.00406814
			18.341	7.66102e-05	0.612882	0.00406754
			18.3451	7.65906e-05	0.612725	0.0040665
			18.3492	7.65634e-05	0.612507	0.00406505
			18.3533	7.65227e-05	0.612182	0.00406289
			18.3574	7.64537e-05	0.61163	0.00405923
			18.3615	7.63949e-05	0.611159	0.0040561
			18.3656	7.6384e-05	0.611072	0.00405553
			18.3697	7.63766e-05	0.611013	0.00405514
			18.3738	7.63656e-05	0.610925	0.00405455
			18.3779	7.63444e-05	0.610755	0.00405343
			18.382	7.63176e-05	0.610541	0.004052
			18.3861	7.62914e-05	0.610331	0.00405061
			18.3902	7.62433e-05	0.609947	0.00404806
			18.3943	7.61672e-05	0.609337	0.00404401
			18.3984	7.61124e-05	0.608899	0.00404111
			18.4024	7.60844e-05	0.608675	0.00403962
			18.4065	7.60669e-05	0.608535	0.00403869
			18.4106	7.60558e-05	0.608447	0.0040381
			18.4147	7.60461e-05	0.608369	0.00403759
			18.4188	7.60349e-05	0.608279	0.00403699
			18.4229	7.60174e-05	0.608139	0.00403606
			18.427	7.59855e-05	0.607884	0.00403437
			18.4311	7.59368e-05	0.607494	0.00403178
			18.4352	7.58874e-05	0.607099	0.00402916
			18.4393	7.58395e-05	0.606716	0.00402662
			18.4434	7.57904e-05	0.606323	0.00402401
			18.4475	7.57259e-05	0.605807	0.00402059
			18.4516	7.56484e-05	0.605187	0.00401647
			18.4557	7.55874e-05	0.604699	0.00401323
			18.4598	7.55433e-05	0.604346	0.00401089
			18.4639	7.55061e-05	0.604049	0.00400891
			18.468	7.54802e-05	0.603842	0.00400754
			18.4721	7.54655e-05	0.603724	0.00400676
			18.4762	7.54515e-05	0.603612	0.00400602
			18.4803	7.544e-05	0.60352	0.00400541
			18.4843	7.54332e-05	0.603466	0.00400505
			18.4884	7.54297e-05	0.603437	0.00400486
			18.4925	7.5425e-05	0.6034	0.00400461
			18.4966	7.54163e-05	0.603331	0.00400415
			18.5007	7.53986e-05	0.603189	0.00400321
			18.5048	7.53639e-05	0.602911	0.00400136
			18.5089	7.53138e-05	0.60251	0.0039987
			18.513	7.5259e-05	0.602072	0.0039958
			18.5171	7.52117e-05	0.601693	0.00399328
			18.5212	7.51882e-05	0.601506	0.00399204
			18.5253	7.51985e-05	0.601588	0.00399259
			18.5294	7.52204e-05	0.601764	0.00399375
			18.5335	7.52399e-05	0.60192	0.00399479
			18.5376	7.52505e-05	0.602004	0.00399534
			18.5417	7.52435e-05	0.601948	0.00399497
			18.5458	7.52203e-05	0.601763	0.00399374
			18.5499	7.52039e-05	0.601631	0.00399287
			18.554	7.51978e-05	0.601582	0.00399255
			18.5581	7.5206e-05	0.601648	0.00399298
			18.5622	7.52309e-05	0.601847	0.0039943
			18.5662	7.52671e-05	0.602137	0.00399623
			18.5703	7.53145e-05	0.602516	0.00399874
			18.5744	7.53815e-05	0.603052	0.0040023
			18.5785	7.54613e-05	0.603691	0.00400654
			18.5826	7.55272e-05	0.604218	0.00401004
			18.5867	7.55756e-05	0.604605	0.00401261
			18.5908	7.56094e-05	0.604875	0.0040144
			18.5949	7.56378e-05	0.605102	0.00401591
			18.599	7.56566e-05	0.605253	0.00401691
			18.6031	7.56445e-05	0.605156	0.00401626
			18.6072	7.56048e-05	0.604839	0.00401416
			18.6113	7.55829e-05	0.604663	0.00401299
			18.6154	7.55643e-05	0.604515	0.00401201
			18.6195	7.55401e-05	0.604321	0.00401072
			18.6236	7.55157e-05	0.604125	0.00400942
			18.6277	7.54985e-05	0.603988	0.00400851
			18.6318	7.54846e-05	0.603877	0.00400778
			18.6359	7.54687e-05	0.60375	0.00400693
			18.64	7.54489e-05	0.603591	0.00400588
			18.644	7.54373e-05	0.603498	0.00400526
			18.6481	7.54479e-05	0.603583	0.00400582
			18.6522	7.54695e-05	0.603756	0.00400697
			18.6563	7.55028e-05	0.604023	0.00400874
			18.6604	7.55423e-05	0.604338	0.00401084
			18.6645	7.55772e-05	0.604617	0.00401269
			18.6686	7.56069e-05	0.604855	0.00401427
			18.6727	7.56188e-05	0.60495	0.0040149
			18.6768	7.56174e-05	0.604939	0.00401483
			18.6809	7.56315e-05	0.605052	0.00401558
			18.685	7.5654e-05	0.605232	0.00401677
			18.6891	7.56745e-05	0.605396	0.00401786
			18.6932	7.56873e-05	0.605498	0.00401854
			18.6973	7.56897e-05	0.605518	0.00401866
			18.7014	7.56777e-05	0.605422	0.00401803
			18.7055	7.56463e-05	0.605171	0.00401636
			18.7096	7.559e-05	0.60472	0.00401337
			18.7137	7.55251e-05	0.604201	0.00400993
			18.7178	7.54701e-05	0.603761	0.00400701
			18.7219	7.54263e-05	0.603411	0.00400468
			18.7259	7.53984e-05	0.603187	0.0040032
			18.73	7.53888e-05	0.60311	0.00400269
			18.7341	7.53876e-05	0.603101	0.00400263
			18.7382	7.53814e-05	0.603051	0.00400229
			18.7423	7.5354e-05	0.602832	0.00400084
			18.7464	7.53097e-05	0.602478	0.00399849
			18.7505	7.5295e-05	0.60236	0.00399771
			18.7546	7.53062e-05	0.60245	0.0039983
			18.7587	7.53234e-05	0.602588	0.00399922
			18.7628	7.53502e-05	0.602802	0.00400064
			18.7669	7.53841e-05	0.603073	0.00400244
			18.771	7.54136e-05	0.603309	0.004004
			18.7751	7.54368e-05	0.603494	0.00400524
			18.7792	7.54687e-05	0.603749	0.00400693
			18.7833	7.55184e-05	0.604148	0.00400957
			18.7874	7.55618e-05	0.604495	0.00401188
			18.7915	7.55943e-05	0.604754	0.0040136
			18.7956	7.56101e-05	0.604881	0.00401444
			18.7997	7.56002e-05	0.604801	0.00401391
			18.8037	7.5557e-05	0.604456	0.00401162
			18.8078	7.55004e-05	0.604003	0.00400861
			18.8119	7.54402e-05	0.603522	0.00400542
			18.816	7.53893e-05	0.603115	0.00400272
			18.8201	7.53605e-05	0.602884	0.00400119
			18.8242	7.53412e-05	0.60273	0.00400016
			18.8283	7.53253e-05	0.602602	0.00399931
			18.8324	7.53133e-05	0.602506	0.00399868
			18.8365	7.53015e-05	0.602412	0.00399805
			18.8406	7.52835e-05	0.602268	0.0039971
			18.8447	7.52549e-05	0.602039	0.00399558
			18.8488	7.51771e-05	0.601417	0.00399145
			18.8529	7.50611e-05	0.600489	0.00398529
			18.857	7.49949e-05	0.59996	0.00398178
			18.8611	7.49653e-05	0.599722	0.0039802
			18.8652	7.49401e-05	0.599521	0.00397887
			18.8693	7.49147e-05	0.599318	0.00397752
			18.8734	7.48884e-05	0.599108	0.00397612
			18.8775	7.48605e-05	0.598884	0.00397464
			18.8816	7.48282e-05	0.598626	0.00397293
			18.8856	7.47787e-05	0.598229	0.00397029
			18.8897	7.47158e-05	0.597726	0.00396696
			18.8938	7.46616e-05	0.597292	0.00396408
			18.8979	7.46122e-05	0.596897	0.00396145
			18.902	7.45768e-05	0.596614	0.00395958
			18.9061	7.45717e-05	0.596573	0.0039593
			18.9102	7.45816e-05	0.596652	0.00395983
			18.9143	7.45794e-05	0.596636	0.00395972
			18.9184	7.45608e-05	0.596487	0.00395873
			18.9225	7.45464e-05	0.596371	0.00395796
			18.9266	7.4561e-05	0.596488	0.00395874
			18.9307	7.45784e-05	0.596627	0.00395966
			18.9348	7.45904e-05	0.596723	0.0039603
			18.9389	7.45922e-05	0.596738	0.00396039
			18.943	7.45774e-05	0.596619	0.00395961
			18.9471	7.45402e-05	0.596321	0.00395763
			18.9512	7.44873e-05	0.595898	0.00395482
			18.9553	7.44166e-05	0.595333	0.00395107
			18.9594	7.43569e-05	0.594855	0.0039479
			18.9634	7.43405e-05	0.594724	0.00394703
			18.9675	7.43387e-05	0.594709	0.00394693
			18.9716	7.43298e-05	0.594638	0.00394646
			18.9757	7.42983e-05	0.594387	0.00394479
			18.9798	7.42572e-05	0.594058	0.00394261
			18.9839	7.42209e-05	0.593767	0.00394068
			18.988	7.41845e-05	0.593476	0.00393875
			18.9921	7.41495e-05	0.593196	0.00393689
			18.9962	7.41144e-05	0.592915	0.00393503
			19.0003	7.4075e-05	0.5926	0.00393293
			19.0044	7.40338e-05	0.592271	0.00393075
			19.0085	7.39909e-05	0.591927	0.00392847
			19.0126	7.39418e-05	0.591534	0.00392586
			19.0167	7.3881e-05	0.591048	0.00392263
			19.0208	7.38011e-05	0.590409	0.00391839
			19.0249	7.37166e-05	0.589733	0.0039139
			19.029	7.36769e-05	0.589415	0.0039118
			19.0331	7.36922e-05	0.589538	0.00391261
			19.0372	7.37113e-05	0.58969	0.00391362
			19.0413	7.37291e-05	0.589833	0.00391457
			19.0453	7.37438e-05	0.589951	0.00391535
			19.0494	7.37512e-05	0.590009	0.00391574
			19.0535	7.37447e-05	0.589958	0.0039154
			19.0576	7.36964e-05	0.589571	0.00391283
			19.0617	7.36158e-05	0.588926	0.00390855
			19.0658	7.35766e-05	0.588612	0.00390647
			19.0699	7.35695e-05	0.588556	0.00390609
			19.074	7.35753e-05	0.588602	0.0039064
			19.0781	7.35815e-05	0.588652	0.00390673
			19.0822	7.35838e-05	0.58867	0.00390685
			19.0863	7.35817e-05	0.588654	0.00390674
			19.0904	7.35711e-05	0.588569	0.00390618
			19.0945	7.35479e-05	0.588383	0.00390495
			19.0986	7.3551e-05	0.588408	0.00390511
			19.1027	7.36037e-05	0.58883	0.00390791
			19.1068	7.36583e-05	0.589267	0.00391081
			19.1109	7.37113e-05	0.589691	0.00391363
			19.115	7.37696e-05	0.590156	0.00391672
			19.1191	7.38313e-05	0.59065	0.00391999
			19.1232	7.38802e-05	0.591041	0.00392259
			19.1272	7.39131e-05	0.591304	0.00392434
			19.1313	7.39085e-05	0.591268	0.00392409
			19.1354	7.38772e-05	0.591018	0.00392243
			19.1395	7.38669e-05	0.590935	0.00392189
			19.1436	7.38671e-05	0.590937	0.0039219
			19.1477	7.38576e-05	0.59086	0.00392139
			19.1518	7.38252e-05	0.590601	0.00391967
			19.1559	7.37801e-05	0.590241	0.00391728
			19.16	7.37304e-05	0.589843	0.00391464
			19.1641	7.36678e-05	0.589342	0.00391131
			19.1682	7.36002e-05	0.588802	0.00390773
			19.1723	7.35448e-05	0.588358	0.00390478
			19.1764	7.35082e-05	0.588066	0.00390284
[truncated: 445 more rows]

## Sheet: Figure 4D
hL1ORF1p-NTR(H6)			volume	OD280	OD280	OD280		volume	MW
			(ml)	relative		normalized		(ml)	kDa
Injection volume	100 µl
Superdex 200			11.003	0.000224938	1.79951	0.00393329		18.0339	6.30238
			11.0071	0.000224852	1.79881	0.00393177		18.038	6.30994
			11.0112	0.000224742	1.79794	0.00392986		18.0421	6.31929
			11.0153	0.000224654	1.79724	0.00392832		18.0462	6.3276
			11.0194	0.000224605	1.79684	0.00392747		18.0503	6.33711
			11.0234	0.000224551	1.79641	0.00392652		18.0544	6.34672
			11.0275	0.000224487	1.7959	0.0039254		18.0585	6.35503
			11.0316	0.000224383	1.79506	0.00392358		18.0626	6.36244
			11.0357	0.000224239	1.79391	0.00392105		18.0667	6.36956
			11.0398	0.000224112	1.7929	0.00391885		18.0708	6.37699
			11.0439	0.000223998	1.79198	0.00391684		18.0749	6.38578
			11.048	0.000223891	1.79113	0.00391497		18.0789	6.39552
			11.0521	0.000223828	1.79063	0.00391388		18.083	6.40491
			11.0562	0.000223821	1.79057	0.00391375		18.0871	6.41429
			11.0603	0.000223798	1.79038	0.00391335		18.0912	6.42415
			11.0644	0.000223756	1.79005	0.00391261		18.0953	6.43368
			11.0685	0.000223689	1.78951	0.00391145		18.0994	6.44312
			11.0726	0.000223608	1.78886	0.00391002		18.1035	6.45236
			11.0767	0.000223522	1.78818	0.00390852		18.1076	6.46165
			11.0808	0.000223404	1.78724	0.00390647		18.1117	6.47023
			11.0849	0.000223278	1.78622	0.00390425		18.1158	6.47926
			11.089	0.000223214	1.78571	0.00390314		18.1199	6.48834
			11.0931	0.000223185	1.78548	0.00390264		18.124	6.49702
			11.0972	0.000223175	1.7854	0.00390245		18.1281	6.50561
			11.1013	0.000223161	1.78529	0.00390221		18.1322	6.51413
			11.1053	0.000223143	1.78514	0.0039019		18.1363	6.52275
			11.1094	0.000223118	1.78495	0.00390146		18.1404	6.5317
			11.1135	0.000223084	1.78467	0.00390086		18.1445	6.54005
			11.1176	0.000223013	1.78411	0.00389963		18.1486	6.5484
			11.1217	0.000222916	1.78333	0.00389792		18.1527	6.55641
			11.1258	0.000222839	1.78271	0.00389658		18.1568	6.56437
			11.1299	0.000222758	1.78207	0.00389517		18.1608	6.57285
			11.134	0.000222663	1.7813	0.0038935		18.1649	6.58049
			11.1381	0.00022256	1.78048	0.0038917		18.169	6.58869
			11.1422	0.000222459	1.77967	0.00388994		18.1731	6.59734
			11.1463	0.000222361	1.77889	0.00388822		18.1772	6.60556
			11.1504	0.000222274	1.77819	0.0038867		18.1813	6.6128
			11.1545	0.0002222	1.7776	0.00388541		18.1854	6.61957
			11.1586	0.000222119	1.77695	0.00388398		18.1895	6.62637
			11.1627	0.00022202	1.77616	0.00388226		18.1936	6.63306
			11.1668	0.000221912	1.7753	0.00388038		18.1977	6.63943
			11.1709	0.000221828	1.77463	0.00387891		18.2018	6.64545
			11.175	0.000221778	1.77422	0.00387802		18.2059	6.65148
			11.1791	0.000222289	1.77831	0.00388696		18.21	6.65738
			11.1831	0.000224229	1.79383	0.00392089		18.2141	6.66353
			11.1872	0.00022702	1.81616	0.00396968		18.2182	6.66918
			11.1913	0.000229586	1.83668	0.00401455		18.2223	6.67405
			11.1954	0.000231733	1.85386	0.0040521		18.2264	6.6795
			11.1995	0.000232669	1.86135	0.00406846		18.2305	6.68501
			11.2036	0.000232223	1.85778	0.00406066		18.2346	6.69045
			11.2077	0.00023147	1.85176	0.0040475		18.2386	6.69593
			11.2118	0.000230781	1.84625	0.00403545		18.2427	6.70149
			11.2159	0.000230125	1.841	0.00402398		18.2468	6.70715
			11.22	0.0002295	1.836	0.00401305		18.2509	6.71296
			11.2241	0.000228916	1.83133	0.00400285		18.255	6.71875
			11.2282	0.000228382	1.82705	0.0039935		18.2591	6.72407
			11.2323	0.000227876	1.82301	0.00398466		18.2632	6.72865
			11.2364	0.000227394	1.81915	0.00397623		18.2673	6.73332
			11.2405	0.000226922	1.81538	0.00396797		18.2714	6.73924
			11.2446	0.000227027	1.81622	0.00396982		18.2755	6.74474
			11.2487	0.00022867	1.82936	0.00399854		18.2796	6.75072
			11.2528	0.000231321	1.85057	0.0040449		18.2837	6.75588
			11.2569	0.000233978	1.87182	0.00409135		18.2878	6.76118
			11.261	0.000236577	1.89261	0.00413679		18.2919	6.7664
			11.265	0.000239027	1.91222	0.00417965		18.296	6.77118
			11.2691	0.000241332	1.93066	0.00421996		18.3001	6.77613
			11.2732	0.000243494	1.94795	0.00425775		18.3042	6.78096
			11.2773	0.00024551	1.96408	0.00429301		18.3083	6.78573
			11.2814	0.000247397	1.97917	0.00432599		18.3124	6.79056
			11.2855	0.000249192	1.99354	0.00435739		18.3165	6.79535
			11.2896	0.000250826	2.00661	0.00438596		18.3205	6.80025
			11.2937	0.000252194	2.01755	0.00440988		18.3246	6.8049
			11.2978	0.000253238	2.0259	0.00442813		18.3287	6.80927
			11.3019	0.000253297	2.02638	0.00442918		18.3328	6.81432
			11.306	0.000251921	2.01536	0.0044051		18.3369	6.81834
			11.3101	0.000250041	2.00033	0.00437223		18.341	6.82324
			11.3142	0.000248246	1.98597	0.00434085		18.3451	6.82799
			11.3183	0.000246523	1.97219	0.00431072		18.3492	6.83169
			11.3224	0.000244848	1.95878	0.00428143		18.3533	6.83486
			11.3265	0.000243222	1.94578	0.004253		18.3574	6.83851
			11.3306	0.000242059	1.93647	0.00423266		18.3615	6.84166
			11.3347	0.000242216	1.93773	0.00423541		18.3656	6.84394
			11.3388	0.000243771	1.95017	0.0042626		18.3697	6.8466
			11.3429	0.000245767	1.96614	0.0042975		18.3738	6.8502
			11.3469	0.000247645	1.98116	0.00433034		18.3779	6.85421
			11.351	0.000249409	1.99527	0.00436118		18.382	6.85814
			11.3551	0.000251065	2.00852	0.00439014		18.3861	6.86182
			11.3592	0.000252621	2.02097	0.00441735		18.3902	6.86557
			11.3633	0.000254066	2.03252	0.00444261		18.3943	6.86849
			11.3674	0.00025537	2.04296	0.00446542		18.3983	6.87249
			11.3715	0.000256524	2.05219	0.0044856		18.4024	6.8762
			11.3756	0.000257482	2.05985	0.00450234		18.4065	6.88071
			11.3797	0.000257542	2.06033	0.0045034		18.4106	6.88458
			11.3838	0.000256104	2.04883	0.00447825		18.4147	6.88746
			11.3879	0.000254784	2.03827	0.00445517		18.4188	6.89098
			11.392	0.000254856	2.03885	0.00445644		18.4229	6.89465
			11.3961	0.000255531	2.04425	0.00446824		18.427	6.89787
			11.4002	0.000256539	2.05231	0.00448586		18.4311	6.90055
			11.4043	0.000257727	2.06182	0.00450664		18.4352	6.90329
			11.4084	0.000258873	2.07098	0.00452667		18.4393	6.90599
			11.4125	0.000259931	2.07945	0.00454517		18.4434	6.90835
			11.4166	0.000260875	2.087	0.00456168		18.4475	6.91161
			11.4207	0.00026164	2.09312	0.00457506		18.4516	6.91483
			11.4247	0.000262144	2.09715	0.00458387		18.4557	6.91729
			11.4288	0.000262308	2.09847	0.00458674		18.4598	6.92061
			11.4329	0.000261497	2.09197	0.00457255		18.4639	6.92385
			11.437	0.000259414	2.07531	0.00453613		18.468	6.92627
			11.4411	0.000256984	2.05587	0.00449364		18.4721	6.92913
			11.4452	0.000254616	2.03693	0.00445223		18.4762	6.93219
			11.4493	0.000252358	2.01886	0.00441274		18.4802	6.93506
			11.4534	0.000250255	2.00204	0.00437598		18.4843	6.9374
			11.4575	0.000248283	1.98626	0.00434149		18.4884	6.94008
			11.4616	0.000246422	1.97137	0.00430895		18.4925	6.94317
			11.4657	0.000244653	1.95722	0.00427802		18.4966	6.94627
			11.4698	0.000242974	1.94379	0.00424867		18.5007	6.94871
			11.4739	0.000241388	1.9311	0.00422092		18.5048	6.95042
			11.478	0.000239888	1.91911	0.0041947		18.5089	6.95293
			11.4821	0.000238468	1.90774	0.00416987		18.513	6.95593
			11.4862	0.00023712	1.89696	0.0041463		18.5171	6.95924
			11.4903	0.000235838	1.8867	0.00412387		18.5212	6.96171
			11.4944	0.00023461	1.87688	0.0041024		18.5253	6.96612
			11.4985	0.000233434	1.86747	0.00408184		18.5294	6.9705
			11.5026	0.000232314	1.85851	0.00406227		18.5335	6.97369
			11.5066	0.00023127	1.85016	0.00404401		18.5376	6.97731
			11.5107	0.000230312	1.8425	0.00402726		18.5417	6.9806
			11.5148	0.000229671	1.83737	0.00401605		18.5458	6.98442
			11.5189	0.000229679	1.83743	0.00401619		18.5499	6.98796
			11.523	0.000230078	1.84062	0.00402316		18.554	6.99191
			11.5271	0.000230228	1.84183	0.00402579		18.558	6.9965
			11.5312	0.000229745	1.83796	0.00401734		18.5621	7.0003
			11.5353	0.00022889	1.83112	0.00400239		18.5662	7.00336
			11.5394	0.000228026	1.82421	0.00398728		18.5703	7.00653
			11.5435	0.000227186	1.81749	0.00397259		18.5744	7.00759
			11.5476	0.000226388	1.81111	0.00395864		18.5785	7.0079
			11.5517	0.000225632	1.80505	0.00394541		18.5826	7.00815
			11.5558	0.000224906	1.79924	0.00393272		18.5867	7.00711
			11.5599	0.000224198	1.79358	0.00392034		18.5908	7.01102
			11.564	0.000223522	1.78818	0.00390852		18.5949	7.01659
			11.5681	0.000223275	1.7862	0.00390421		18.599	7.02131
			11.5722	0.000224307	1.79445	0.00392224		18.6031	7.02629
			11.5763	0.00022647	1.81176	0.00396007		18.6072	7.03032
			11.5804	0.000228833	1.83066	0.00400139		18.6113	7.0348
			11.5844	0.000231216	1.84973	0.00404307		18.6154	7.03823
			11.5885	0.00023353	1.86824	0.00408352		18.6195	7.04095
			11.5926	0.000235732	1.88586	0.00412203		18.6236	7.04549
			11.5967	0.000237812	1.9025	0.0041584		18.6277	7.05088
			11.6008	0.000239774	1.91819	0.0041927		18.6318	7.0556
			11.6049	0.00024162	1.93296	0.00422498		18.6359	7.06191
			11.609	0.000243355	1.94684	0.00425533		18.6399	7.06788
			11.6131	0.000244998	1.95998	0.00428405		18.644	7.07419
			11.6172	0.000246563	1.9725	0.00431142		18.6481	7.07891
			11.6213	0.000248047	1.98438	0.00433737		18.6522	7.08449
			11.6254	0.00024945	1.9956	0.00436191		18.6563	7.0905
			11.6295	0.000250777	2.00621	0.0043851		18.6604	7.09668
			11.6336	0.000252025	2.0162	0.00440693		18.6645	7.10319
			11.6377	0.000253183	2.02546	0.00442718		18.6686	7.1087
			11.6418	0.000254249	2.03399	0.00444582		18.6727	7.11543
			11.6459	0.000255236	2.04189	0.00446308		18.6768	7.12309
			11.65	0.000256171	2.04937	0.00447942		18.6809	7.13058
			11.6541	0.000257048	2.05638	0.00449476		18.685	7.13728
			11.6582	0.000257864	2.06292	0.00450904		18.6891	7.14397
			11.6623	0.000258619	2.06895	0.00452223		18.6932	7.15363
			11.6663	0.000259317	2.07453	0.00453443		18.6973	7.16388
			11.6704	0.000259965	2.07972	0.00454577		18.7014	7.17087
			11.6745	0.000260559	2.08447	0.00455615		18.7055	7.17893
			11.6786	0.000261078	2.08863	0.00456524		18.7096	7.18661
			11.6827	0.000261545	2.09236	0.00457339		18.7137	7.19376
			11.6868	0.000262018	2.09615	0.00458167		18.7178	7.19959
			11.6909	0.000262473	2.09978	0.00458962		18.7218	7.20741
			11.695	0.000262911	2.10329	0.00459728		18.7259	7.21511
			11.6991	0.00026334	2.10672	0.00460479		18.73	7.2238
			11.7032	0.000263753	2.11002	0.004612		18.7341	7.23222
			11.7073	0.000264142	2.11314	0.00461881		18.7382	7.2407
			11.7114	0.000264504	2.11603	0.00462514		18.7423	7.24968
			11.7155	0.000264838	2.11871	0.00463098		18.7464	7.25755
			11.7196	0.000265141	2.12113	0.00463627		18.7505	7.2643
			11.7237	0.000265406	2.12325	0.0046409		18.7546	7.27238
			11.7278	0.000265646	2.12517	0.0046451		18.7587	7.28084
			11.7319	0.000265886	2.12709	0.0046493		18.7628	7.28915
			11.736	0.000266132	2.12905	0.0046536		18.7669	7.29637
			11.7401	0.00026637	2.13096	0.00465777		18.771	7.30259
			11.7442	0.000266581	2.13265	0.00466146		18.7751	7.31066
			11.7482	0.000266748	2.13399	0.00466438		18.7792	7.31851
			11.7523	0.000266891	2.13513	0.00466687		18.7833	7.32602
			11.7564	0.000267031	2.13625	0.00466932		18.7874	7.33165
			11.7605	0.00026716	2.13728	0.00467157		18.7915	7.33822
			11.7646	0.00026727	2.13816	0.0046735		18.7956	7.34605
			11.7687	0.000267355	2.13884	0.00467498		18.7996	7.35463
			11.7728	0.000267422	2.13938	0.00467616		18.8037	7.3624
			11.7769	0.000267492	2.13994	0.00467739		18.8078	7.36989
			11.781	0.000267557	2.14045	0.00467852		18.8119	7.37885
			11.7851	0.000267636	2.14109	0.0046799		18.816	7.38716
			11.7892	0.000267737	2.14189	0.00468166		18.8201	7.39362
			11.7933	0.000267825	2.1426	0.00468321		18.8242	7.40112
			11.7974	0.000267898	2.14319	0.00468449		18.8283	7.40777
			11.8015	0.000267948	2.14358	0.00468535		18.8324	7.41725
			11.8056	0.000267982	2.14386	0.00468596		18.8365	7.42608
			11.8097	0.000268021	2.14417	0.00468664
			11.8138	0.000268059	2.14447	0.00468729
			11.8179	0.000268092	2.14474	0.00468788
			11.822	0.000268115	2.14492	0.00468828
			11.826	0.000268121	2.14497	0.00468838
			11.8301	0.000268106	2.14485	0.00468812
			11.8342	0.000268071	2.14457	0.00468751
			11.8383	0.000268027	2.14422	0.00468674
			11.8424	0.000267969	2.14375	0.00468573
			11.8465	0.000267902	2.14322	0.00468456
			11.8506	0.00026785	2.1428	0.00468364
			11.8547	0.000267813	2.14251	0.004683
			11.8588	0.000267778	2.14223	0.00468239
			11.8629	0.000267729	2.14183	0.00468152
			11.867	0.000267669	2.14135	0.00468048
			11.8711	0.000267621	2.14097	0.00467964
			11.8752	0.000267598	2.14078	0.00467924
			11.8793	0.000267587	2.14069	0.00467904
			11.8834	0.000267585	2.14068	0.00467901
			11.8875	0.000267589	2.14072	0.00467909
			11.8916	0.000267598	2.14079	0.00467924
			11.8957	0.000267607	2.14086	0.0046794
			11.8998	0.000267609	2.14087	0.00467942
			11.9039	0.000267596	2.14077	0.0046792
			11.9079	0.000267565	2.14052	0.00467866
			11.912	0.000267523	2.14018	0.00467792
			11.9161	0.00026748	2.13984	0.00467717
			11.9202	0.000267426	2.13941	0.00467624
			11.9243	0.00026735	2.1388	0.00467491
			11.9284	0.000267268	2.13814	0.00467347
			11.9325	0.000267219	2.13775	0.0046726
			11.9366	0.000267181	2.13744	0.00467194
			11.9407	0.000267146	2.13717	0.00467133
			11.9448	0.000267115	2.13692	0.0046708
			11.9489	0.000267087	2.1367	0.00467031
			11.953	0.000267057	2.13646	0.00466978
			11.9571	0.000267022	2.13618	0.00466917
			11.9612	0.000266989	2.13591	0.00466859
			11.9653	0.000266962	2.13569	0.00466811
			11.9694	0.000266928	2.13543	0.00466753
			11.9735	0.000266888	2.1351	0.00466682
			11.9776	0.000266836	2.13469	0.00466592
			11.9817	0.000266774	2.13419	0.00466482
			11.9857	0.000266701	2.13361	0.00466356
			11.9898	0.000266592	2.13273	0.00466164
			11.9939	0.000266439	2.13151	0.00465897
			11.998	0.000266318	2.13055	0.00465686
			12.0021	0.000266257	2.13006	0.00465579
			12.0062	0.000266193	2.12954	0.00465467
			12.0103	0.00026612	2.12896	0.00465339
			12.0144	0.000266025	2.1282	0.00465174
			12.0185	0.000265927	2.12741	0.00465001
			12.0226	0.000265848	2.12678	0.00464864
			12.0267	0.000265773	2.12619	0.00464733
			12.0308	0.000265697	2.12558	0.004646
			12.0349	0.000265619	2.12495	0.00464463
			12.039	0.000265526	2.12421	0.004643
			12.0431	0.000265428	2.12343	0.0046413
			12.0472	0.000265361	2.12289	0.00464012
			12.0513	0.000265303	2.12243	0.00463911
			12.0554	0.000265242	2.12194	0.00463804
			12.0595	0.000265175	2.1214	0.00463688
			12.0636	0.0002651	2.1208	0.00463556
			12.0676	0.000265032	2.12026	0.00463437
			12.0717	0.000264984	2.11988	0.00463354
			12.0758	0.000264938	2.11951	0.00463273
			12.0799	0.000264888	2.1191	0.00463185
			12.084	0.000264828	2.11863	0.00463081
			12.0881	0.000264757	2.11806	0.00462956
			12.0922	0.000264674	2.11739	0.00462811
			12.0963	0.000264561	2.11649	0.00462614
			12.1004	0.000264413	2.1153	0.00462354
			12.1045	0.000264277	2.11422	0.00462117
			12.1086	0.00026416	2.11328	0.00461912
			12.1127	0.00026406	2.11248	0.00461738
			12.1168	0.000263979	2.11183	0.00461595
			12.1209	0.000263906	2.11124	0.00461467
			12.125	0.000263848	2.11079	0.00461367
			12.1291	0.000263806	2.11045	0.00461293
			12.1332	0.000263764	2.11011	0.00461219
			12.1373	0.000263721	2.10977	0.00461144
			12.1414	0.000263676	2.10941	0.00461066
			12.1454	0.000263625	2.109	0.00460977
			12.1495	0.000263575	2.1086	0.00460889
			12.1536	0.000263533	2.10827	0.00460816
			12.1577	0.000263494	2.10795	0.00460748
			12.1618	0.000263446	2.10757	0.00460663
			12.1659	0.00026338	2.10704	0.00460548
			12.17	0.00026328	2.10624	0.00460374
			12.1741	0.00026319	2.10552	0.00460216
			12.1782	0.000263147	2.10517	0.0046014
			12.1823	0.000263098	2.10479	0.00460056
			12.1864	0.000263039	2.10431	0.00459952
			12.1905	0.000262951	2.10361	0.00459798
			12.1946	0.000262837	2.1027	0.00459599
			12.1987	0.00026271	2.10168	0.00459377
			12.2028	0.000262565	2.10052	0.00459122
			12.2069	0.000262428	2.09942	0.00458884
			12.211	0.000262317	2.09853	0.00458689
			12.2151	0.000262214	2.09771	0.00458509
			12.2192	0.000262119	2.09695	0.00458342
			12.2233	0.00026203	2.09624	0.00458188
			12.2273	0.000261942	2.09553	0.00458033
			12.2314	0.000261843	2.09474	0.0045786
			12.2355	0.000261727	2.09381	0.00457657
			12.2396	0.000261601	2.0928	0.00457437
			12.2437	0.000261536	2.09229	0.00457323
			12.2478	0.000261541	2.09233	0.00457333
			12.2519	0.000261538	2.0923	0.00457327
			12.256	0.000261523	2.09218	0.00457301
			12.2601	0.000261485	2.09188	0.00457234
			12.2642	0.000261441	2.09153	0.00457158
			12.2683	0.000261428	2.09142	0.00457134
			12.2724	0.000261431	2.09144	0.00457139
			12.2765	0.000261428	2.09142	0.00457135
			12.2806	0.000261419	2.09135	0.00457119
			12.2847	0.000261406	2.09125	0.00457097
			12.2888	0.000261389	2.09111	0.00457067
			12.2929	0.000261364	2.09091	0.00457023
			12.297	0.000261324	2.09059	0.00456954
			12.3011	0.000261273	2.09018	0.00456864
			12.3052	0.000261222	2.08977	0.00456774
			12.3092	0.000261164	2.08931	0.00456674
			12.3133	0.000261113	2.0889	0.00456583
			12.3174	0.000261076	2.08861	0.00456519
			12.3215	0.000261035	2.08828	0.00456448
			12.3256	0.000260981	2.08785	0.00456354
			12.3297	0.000260902	2.08722	0.00456216
			12.3338	0.000260793	2.08634	0.00456025
			12.3379	0.000260681	2.08545	0.00455828
			12.342	0.000260575	2.0846	0.00455643
			12.3461	0.000260472	2.08378	0.00455463
			12.3502	0.000260379	2.08303	0.004553
			12.3543	0.000260291	2.08233	0.00455147
			12.3584	0.000260189	2.08151	0.00454968
			12.3625	0.000260066	2.08053	0.00454754
			12.3666	0.00025991	2.07928	0.00454481
			12.3707	0.000259735	2.07788	0.00454175
			12.3748	0.000259566	2.07652	0.00453878
			12.3789	0.000259396	2.07517	0.00453582
			12.383	0.000259257	2.07406	0.00453339
			12.387	0.000259167	2.07334	0.00453182
			12.3911	0.000259084	2.07267	0.00453036
			12.3952	0.000258997	2.07197	0.00452883
			12.3993	0.00025888	2.07104	0.0045268
			12.4034	0.000258744	2.06995	0.00452442
			12.4075	0.000258636	2.06909	0.00452252
			12.4116	0.000258526	2.06821	0.00452061
			12.4157	0.000258413	2.0673	0.00451863
			12.4198	0.000258316	2.06653	0.00451693
			12.4239	0.000258251	2.06601	0.0045158
			12.428	0.000258185	2.06548	0.00451464
			12.4321	0.000258115	2.06492	0.00451341
			12.4362	0.000258041	2.06433	0.00451213
			12.4403	0.000257967	2.06373	0.00451083
			12.4444	0.000257892	2.06314	0.00450953
			12.4485	0.000257812	2.0625	0.00450812
			12.4526	0.00025773	2.06184	0.00450669
			12.4567	0.000257659	2.06127	0.00450545
			12.4608	0.000257599	2.06079	0.0045044
			12.4649	0.000257535	2.06028	0.00450327
			12.4689	0.000257462	2.05969	0.00450199
			12.473	0.000257377	2.05902	0.00450052
			12.4771	0.000257285	2.05828	0.00449891
			12.4812	0.000257192	2.05754	0.00449728
			12.4853	0.000257093	2.05674	0.00449555
			12.4894	0.000257029	2.05623	0.00449442
			12.4935	0.000257019	2.05615	0.00449426
			12.4976	0.000257006	2.05605	0.00449403
			12.5017	0.000256987	2.0559	0.0044937
			12.5058	0.000256963	2.0557	0.00449327
			12.5099	0.000256929	2.05543	0.00449268
			12.514	0.00025688	2.05504	0.00449182
			12.5181	0.000256783	2.05426	0.00449012
			12.5222	0.000256655	2.05324	0.00448788
			12.5263	0.000256568	2.05255	0.00448637
			12.5304	0.000256505	2.05204	0.00448526
			12.5345	0.000256444	2.05155	0.0044842
			12.5386	0.000256378	2.05102	0.00448304
			12.5427	0.000256299	2.05039	0.00448166
			12.5467	0.000256207	2.04965	0.00448005
			12.5508	0.000256111	2.04889	0.00447838
			12.5549	0.000255973	2.04779	0.00447597
			12.559	0.000255806	2.04645	0.00447304
			12.5631	0.00025572	2.04576	0.00447154
			12.5672	0.000255695	2.04556	0.00447111
			12.5713	0.000255682	2.04545	0.00447087
			12.5754	0.000255668	2.04534	0.00447062
			12.5795	0.000255643	2.04514	0.00447018
			12.5836	0.000255604	2.04483	0.00446952
			12.5877	0.000255518	2.04415	0.00446801
			12.5918	0.000255385	2.04308	0.00446568
			12.5959	0.000255272	2.04218	0.00446371
			12.6	0.000255176	2.04141	0.00446203
			12.6041	0.000255086	2.04069	0.00446045
			12.6082	0.000255005	2.04004	0.00445904
			12.6123	0.000254939	2.03951	0.00445788
			12.6164	0.000254879	2.03903	0.00445684
			12.6205	0.000254817	2.03854	0.00445575
			12.6246	0.000254753	2.03802	0.00445462
			12.6286	0.0002547	2.0376	0.0044537
			12.6327	0.000254664	2.03731	0.00445308
			12.6368	0.000254625	2.037	0.00445239
			12.6409	0.000254578	2.03663	0.00445157
			12.645	0.000254526	2.03621	0.00445066
			12.6491	0.000254473	2.03578	0.00444972
			12.6532	0.000254414	2.03531	0.0044487
			12.6573	0.000254345	2.03476	0.00444749
			12.6614	0.000254255	2.03404	0.00444592
			12.6655	0.000254147	2.03317	0.00444403
			12.6696	0.000254044	2.03235	0.00444223
			12.6737	0.000253941	2.03153	0.00444044
			12.6778	0.000253835	2.03068	0.00443857
			12.6819	0.000253721	2.02977	0.00443659
			12.686	0.000253603	2.02882	0.00443452
			12.6901	0.000253488	2.0279	0.0044325
			12.6942	0.000253373	2.02698	0.0044305
			12.6983	0.000253276	2.02621	0.0044288
			12.7024	0.000253209	2.02567	0.00442763
			12.7064	0.00025316	2.02528	0.00442677
			12.7105	0.000253127	2.02502	0.0044262
			12.7146	0.000253094	2.02475	0.00442561
			12.7187	0.000253056	2.02445	0.00442496
			12.7228	0.000253008	2.02407	0.00442412
			12.7269	0.000252941	2.02353	0.00442294
			12.731	0.000252868	2.02295	0.00442168
			12.7351	0.000252813	2.02251	0.00442071
			12.7392	0.000252771	2.02217	0.00441997
			12.7433	0.000252723	2.02179	0.00441914
			12.7474	0.000252666	2.02133	0.00441813
			12.7515	0.000252594	2.02075	0.00441687
			12.7556	0.000252519	2.02016	0.00441557
			12.7597	0.000252444	2.01955	0.00441425
			12.7638	0.000252359	2.01887	0.00441276
			12.7679	0.000252273	2.01819	0.00441127
			12.772	0.0002522	2.0176	0.00440998
			12.7761	0.000252134	2.01708	0.00440884
			12.7802	0.000252067	2.01654	0.00440767
			12.7843	0.000251991	2.01593	0.00440633
			12.7883	0.000251892	2.01513	0.0044046
			12.7924	0.000251765	2.01412	0.00440238
			12.7965	0.000251632	2.01306	0.00440006
			12.8006	0.00025147	2.01176	0.00439723
			12.8047	0.000251277	2.01021	0.00439384
			12.8088	0.000251091	2.00873	0.00439059
			12.8129	0.000250907	2.00726	0.00438738
			12.817	0.000250725	2.0058	0.0043842
			12.8211	0.000250545	2.00436	0.00438105
			12.8252	0.000250381	2.00305	0.00437819
			12.8293	0.000250252	2.00202	0.00437592
			12.8334	0.000250149	2.00119	0.00437412
			12.8375	0.000250061	2.00049	0.00437258
			12.8416	0.00024997	1.99976	0.00437099
			12.8457	0.000249871	1.99897	0.00436926
			12.8498	0.000249764	1.99811	0.0043674
			12.8539	0.000249648	1.99719	0.00436537
			12.858	0.00024952	1.99616	0.00436312
			12.8621	0.000249386	1.99509	0.00436078
			12.8662	0.000249261	1.99409	0.00435859
			12.8702	0.000249141	1.99312	0.00435649
			12.8743	0.000249041	1.99233	0.00435475
			12.8784	0.000248976	1.99181	0.00435362
			12.8825	0.000248926	1.99141	0.00435273
			12.8866	0.000248873	1.99098	0.00435181
			12.8907	0.000248806	1.99045	0.00435063
			12.8948	0.000248732	1.98986	0.00434935
			12.8989	0.000248659	1.98927	0.00434807
			12.903	0.00024858	1.98864	0.00434669
			12.9071	0.000248483	1.98786	0.00434499
			12.9112	0.000248379	1.98703	0.00434317
			12.9153	0.000248299	1.98639	0.00434177
			12.9194	0.000248221	1.98577	0.00434041
			12.9235	0.000248142	1.98514	0.00433904
			12.9276	0.000248069	1.98455	0.00433776
			12.9317	0.000248002	1.98402	0.00433658
			12.9358	0.000247928	1.98342	0.00433529
			12.9399	0.000247839	1.98271	0.00433372
			12.944	0.000247737	1.9819	0.00433196
			12.948	0.000247644	1.98115	0.00433032
			12.9521	0.000247543	1.98034	0.00432855
			12.9562	0.000247422	1.97937	0.00432644
			12.9603	0.000247273	1.97818	0.00432383
			12.9644	0.000247108	1.97686	0.00432095
			12.9685	0.000246967	1.97574	0.00431849
			12.9726	0.000246852	1.97481	0.00431647
			12.9767	0.000246772	1.97418	0.00431508
			12.9808	0.00024673	1.97384	0.00431433
			12.9849	0.000246696	1.97356	0.00431374
			12.989	0.00024666	1.97328	0.00431312
			12.9931	0.000246621	1.97297	0.00431243
			12.9972	0.000246568	1.97254	0.0043115
			13.0013	0.000246493	1.97194	0.00431019
			13.0054	0.000246398	1.97119	0.00430854
			13.0095	0.000246284	1.97027	0.00430653
			13.0136	0.000246166	1.96933	0.00430447
			13.0177	0.000246064	1.96851	0.00430269
			13.0218	0.000245975	1.9678	0.00430113
			13.0259	0.000245897	1.96718	0.00429977
			13.0299	0.000245819	1.96655	0.00429841
			13.034	0.00024574	1.96592	0.00429702
			13.0381	0.000245638	1.9651	0.00429524
			13.0422	0.000245488	1.9639	0.00429262
			13.0463	0.000245323	1.96258	0.00428973
			13.0504	0.00024519	1.96152	0.00428742
			13.0545	0.000245086	1.96069	0.00428559
			13.0586	0.000244993	1.95994	0.00428396
			13.0627	0.000244915	1.95932	0.00428261
			13.0668	0.000244856	1.95885	0.00428157
			13.0709	0.000244803	1.95842	0.00428064
			13.075	0.000244737	1.9579	0.00427949
			13.0791	0.00024464	1.95712	0.0042778
			13.0832	0.000244522	1.95618	0.00427573
			13.0873	0.000244405	1.95524	0.00427368
			13.0914	0.000244303	1.95443	0.00427191
			13.0955	0.000244218	1.95374	0.00427041
			13.0996	0.000244142	1.95313	0.00426908
			13.1037	0.000244067	1.95254	0.00426778
			13.1077	0.000243985	1.95188	0.00426634
			13.1118	0.000243892	1.95114	0.00426472
			13.1159	0.000243788	1.9503	0.00426289
			13.12	0.000243692	1.94954	0.00426122
			13.1241	0.000243615	1.94892	0.00425987
			13.1282	0.000243536	1.94829	0.0042585
			13.1323	0.000243446	1.94757	0.00425691
			13.1364	0.000243354	1.94683	0.00425531
			13.1405	0.000243266	1.94613	0.00425377
			13.1446	0.000243171	1.94536	0.0042521
			13.1487	0.000243061	1.94449	0.00425019
			13.1528	0.000242946	1.94357	0.00424817
			13.1569	0.000242841	1.94273	0.00424634
			13.161	0.000242739	1.94191	0.00424455
			13.1651	0.00024264	1.94112	0.00424281
			13.1692	0.000242553	1.94042	0.0042413
			13.1733	0.000242483	1.93987	0.00424008
			13.1774	0.000242413	1.9393	0.00423885
			13.1815	0.000242339	1.93871	0.00423756
			13.1856	0.000242259	1.93807	0.00423616
			13.1896	0.000242201	1.93761	0.00423514
			13.1937	0.000242194	1.93755	0.00423502
			13.1978	0.000242201	1.93761	0.00423515
			13.2019	0.000242203	1.93762	0.00423517
			13.206	0.000242196	1.93757	0.00423507
			13.2101	0.000242169	1.93735	0.00423458
			13.2142	0.000242114	1.93691	0.00423362
			13.2183	0.000242031	1.93625	0.00423218
			13.2224	0.000241921	1.93537	0.00423025
			13.2265	0.000241836	1.93469	0.00422876
			13.2306	0.000241777	1.93421	0.00422772
			13.2347	0.00024172	1.93376	0.00422674
			13.2388	0.000241655	1.93324	0.0042256
			13.2429	0.000241589	1.93271	0.00422444
			13.247	0.000241523	1.93219	0.00422329
			13.2511	0.000241447	1.93157	0.00422196
			13.2552	0.00024135	1.9308	0.00422027
			13.2593	0.000241242	1.92994	0.00421838
			13.2634	0.000241152	1.92922	0.0042168
			13.2674	0.000241069	1.92855	0.00421535
			13.2715	0.000240981	1.92785	0.00421382
			13.2756	0.000240879	1.92703	0.00421202
			13.2797	0.000240783	1.92627	0.00421036
			13.2838	0.000240717	1.92573	0.00420919
			13.2879	0.00024066	1.92528	0.00420819
			13.292	0.000240605	1.92484	0.00420723
			13.2961	0.000240548	1.92438	0.00420623
			13.3002	0.000240487	1.9239	0.00420518
			13.3043	0.000240395	1.92316	0.00420357
			13.3084	0.000240264	1.92211	0.00420127
			13.3125	0.000240153	1.92123	0.00419934
			13.3166	0.000240061	1.92049	0.00419772
			13.3207	0.000239957	1.91965	0.0041959
			13.3248	0.000239834	1.91867	0.00419375
			13.3289	0.000239681	1.91745	0.00419109
			13.333	0.000239504	1.91603	0.00418798
			13.3371	0.000239317	1.91453	0.00418471
			13.3412	0.000239152	1.91321	0.00418183
			13.3453	0.000239051	1.91241	0.00418006
			13.3493	0.00023899	1.91192	0.00417899
			13.3534	0.000238929	1.91143	0.00417792
			13.3575	0.00023886	1.91088	0.00417672
			13.3616	0.000238774	1.91019	0.00417521
			13.3657	0.000238699	1.90959	0.0041739
			13.3698	0.000238666	1.90933	0.00417334
			13.3739	0.00023863	1.90904	0.00417271
			13.378	0.000238583	1.90867	0.00417188
			13.3821	0.000238521	1.90816	0.00417079
			13.3862	0.000238453	1.90763	0.00416961
			13.3903	0.00023838	1.90704	0.00416832
			13.3944	0.000238296	1.90637	0.00416687
			13.3985	0.00023822	1.90576	0.00416554
			13.4026	0.000238166	1.90533	0.00416459
			13.4067	0.000238122	1.90497	0.00416381
			13.4108	0.000238082	1.90465	0.00416311
			13.4149	0.000238035	1.90428	0.0041623
			13.419	0.000237976	1.90381	0.00416126
			13.4231	0.000237884	1.90307	0.00415966
			13.4272	0.000237754	1.90203	0.00415738
			13.4312	0.000237633	1.90107	0.00415527
			13.4353	0.000237559	1.90047	0.00415397
			13.4394	0.000237527	1.90022	0.00415341
			13.4435	0.000237499	1.89999	0.00415292
			13.4476	0.000237472	1.89978	0.00415245
			13.4517	0.000237441	1.89953	0.00415191
			13.4558	0.000237402	1.89922	0.00415124
			13.4599	0.00023734	1.89872	0.00415014
			13.464	0.000237226	1.89781	0.00414815
			13.4681	0.000237097	1.89678	0.0041459
			13.4722	0.000237036	1.89629	0.00414483
			13.4763	0.00023703	1.89624	0.00414472
			13.4804	0.000237017	1.89614	0.0041445
			13.4845	0.000236995	1.89596	0.00414412
			13.4886	0.00023697	1.89576	0.00414368
			13.4927	0.000236945	1.89556	0.00414325
			13.4968	0.000236914	1.89531	0.0041427
			13.5009	0.000236872	1.89498	0.00414197
			13.505	0.000236826	1.89461	0.00414116
			13.509	0.000236788	1.89431	0.0041405
			13.5131	0.000236748	1.89398	0.00413979
			13.5172	0.000236703	1.89362	0.004139
			13.5213	0.000236651	1.89321	0.00413809
			13.5254	0.000236591	1.89273	0.00413705
			13.5295	0.000236524	1.89219	0.00413587
			13.5336	0.000236422	1.89138	0.00413409
			13.5377	0.000236291	1.89032	0.0041318
			13.5418	0.000236195	1.88956	0.00413012
			13.5459	0.000236117	1.88894	0.00412877
			13.55	0.000236037	1.8883	0.00412737
			13.5541	0.00023595	1.8876	0.00412584
			13.5582	0.000235847	1.88678	0.00412404
			13.5623	0.000235726	1.8858	0.00412192
			13.5664	0.00023559	1.88472	0.00411955
			13.5705	0.000235432	1.88346	0.00411678
			13.5746	0.000235268	1.88215	0.00411392
			13.5787	0.000235144	1.88115	0.00411174
			13.5828	0.000235051	1.88041	0.00411013
			13.5869	0.000234967	1.87973	0.00410865
			13.5909	0.000234873	1.87899	0.00410701
			13.595	0.000234775	1.8782	0.00410529
			13.5991	0.000234675	1.8774	0.00410355
			13.6032	0.000234571	1.87657	0.00410173
			13.6073	0.000234458	1.87567	0.00409975
			13.6114	0.000234359	1.87487	0.00409802
			13.6155	0.000234292	1.87434	0.00409685
			13.6196	0.00023423	1.87384	0.00409576
			13.6237	0.000234153	1.87323	0.00409442
			13.6278	0.000234039	1.87231	0.00409243
			13.6319	0.000233891	1.87113	0.00408984
			13.636	0.000233768	1.87014	0.00408768
			13.6401	0.000233665	1.86932	0.00408588
			13.6442	0.000233573	1.86858	0.00408428
			13.6483	0.000233496	1.86797	0.00408293
			13.6524	0.000233441	1.86753	0.00408197
			13.6565	0.0002334	1.8672	0.00408126
			13.6606	0.000233357	1.86686	0.0040805
			13.6647	0.000233319	1.86655	0.00407983
			13.6687	0.000233288	1.8663	0.00407928
			13.6728	0.000233252	1.86602	0.00407867
			13.6769	0.000233213	1.8657	0.00407798
			13.681	0.000233177	1.86542	0.00407736
			13.6851	0.000233153	1.86522	0.00407693
			13.6892	0.000233132	1.86505	0.00407656
			13.6933	0.000233115	1.86492	0.00407627
			13.6974	0.000233106	1.86485	0.00407611
			13.7015	0.000233094	1.86475	0.0040759
			13.7056	0.000233067	1.86454	0.00407543
			13.7097	0.000233017	1.86414	0.00407456
			13.7138	0.000232941	1.86353	0.00407323
			13.7179	0.00023286	1.86288	0.00407181
			13.722	0.000232787	1.8623	0.00407054
			13.7261	0.000232708	1.86167	0.00406915
			13.7302	0.000232611	1.86089	0.00406746
			13.7343	0.000232496	1.85997	0.00406544
			13.7384	0.000232365	1.85892	0.00406316
			13.7425	0.000232227	1.85781	0.00406073
			13.7466	0.000232073	1.85658	0.00405804
			13.7506	0.000231916	1.85533	0.0040553
			13.7547	0.000231784	1.85427	0.004053
			13.7588	0.000231666	1.85333	0.00405093
			13.7629	0.00023156	1.85248	0.00404907
			13.767	0.00023146	1.85168	0.00404732
			13.7711	0.000231362	1.8509	0.00404562
			13.7752	0.000231265	1.85012	0.00404391
			13.7793	0.00023115	1.8492	0.00404191
			13.7834	0.000231009	1.84807	0.00403943
			13.7875	0.000230872	1.84698	0.00403705
			13.7916	0.000230762	1.8461	0.00403512
			13.7957	0.00023069	1.84552	0.00403386
			13.7998	0.00023065	1.8452	0.00403316
			13.8039	0.00023061	1.84488	0.00403246
			13.808	0.000230568	1.84455	0.00403173
			13.8121	0.000230524	1.84419	0.00403095
			13.8162	0.000230475	1.8438	0.00403009
			13.8203	0.000230437	1.8435	0.00402944
			13.8244	0.000230419	1.84335	0.00402912
			13.8285	0.000230398	1.84318	0.00402875
			13.8325	0.000230381	1.84305	0.00402846
			13.8366	0.000230371	1.84297	0.00402829
			13.8407	0.000230358	1.84286	0.00402805
			13.8448	0.000230338	1.8427	0.0040277
			13.8489	0.000230304	1.84243	0.00402711
			13.853	0.00023025	1.842	0.00402617
			13.8571	0.000230186	1.84149	0.00402505
			13.8612	0.000230115	1.84092	0.00402382
			13.8653	0.000230041	1.84032	0.00402251
			13.8694	0.000229964	1.83971	0.00402116
			13.8735	0.000229865	1.83892	0.00401943
			13.8776	0.000229742	1.83793	0.00401728
			13.8817	0.000229632	1.83705	0.00401535
			13.8858	0.000229527	1.83622	0.00401353
			13.8899	0.000229431	1.83545	0.00401184
			13.894	0.000229343	1.83474	0.0040103
			13.8981	0.000229255	1.83404	0.00400877
			13.9022	0.000229165	1.83332	0.00400719
			13.9063	0.000229071	1.83257	0.00400555
			13.9103	0.000228965	1.83172	0.0040037
			13.9144	0.000228848	1.83078	0.00400165
			13.9185	0.00022873	1.82984	0.00399959
			13.9226	0.00022861	1.82888	0.0039975
			13.9267	0.000228516	1.82813	0.00399585
			13.9308	0.000228457	1.82766	0.00399481
			13.9349	0.000228387	1.8271	0.00399359
			13.939	0.000228298	1.82638	0.00399204
			13.9431	0.000228182	1.82546	0.00399001
			13.9472	0.000228061	1.82449	0.0039879
			13.9513	0.000227947	1.82357	0.00398589
			13.9554	0.000227822	1.82258	0.00398371
			13.9595	0.0002277	1.8216	0.00398158
			13.9636	0.000227589	1.82071	0.00397964
			13.9677	0.000227475	1.8198	0.00397765
			13.9718	0.000227334	1.81867	0.00397518
			13.9759	0.000227162	1.81729	0.00397217
			13.98	0.000227001	1.81601	0.00396936
			13.9841	0.000226842	1.81474	0.00396658
			13.9882	0.000226673	1.81338	0.00396361
			13.9922	0.000226477	1.81182	0.0039602
			13.9963	0.000226289	1.81031	0.0039569
			14.0004	0.000226156	1.80925	0.00395459
			14.0045	0.000226033	1.80827	0.00395243
			14.0086	0.000225914	1.80731	0.00395035
			14.0127	0.000225794	1.80636	0.00394826
			14.0168	0.000225672	1.80537	0.00394611
			14.0209	0.000225544	1.80435	0.00394388
			14.025	0.000225405	1.80324	0.00394145
			14.0291	0.000225286	1.80229	0.00393936
			14.0332	0.000225235	1.80188	0.00393848
			14.0373	0.000225217	1.80174	0.00393816
			14.0414	0.000225189	1.80151	0.00393766
			14.0455	0.000225144	1.80115	0.00393688
			14.0496	0.00022508	1.80064	0.00393576
			14.0537	0.000225009	1.80007	0.00393453
			14.0578	0.00022492	1.79936	0.00393297
			14.0619	0.000224803	1.79843	0.00393093
			14.066	0.000224709	1.79767	0.00392928
			14.07	0.000224649	1.7972	0.00392824
			14.0741	0.000224587	1.7967	0.00392715
			14.0782	0.000224521	1.79616	0.00392598
			14.0823	0.000224435	1.79548	0.00392448
			14.0864	0.000224321	1.79456	0.00392249
			14.0905	0.0002242	1.7936	0.00392039
			14.0946	0.000224083	1.79266	0.00391833
			14.0987	0.000223987	1.7919	0.00391666
			14.1028	0.000223921	1.79137	0.00391551
			14.1069	0.000223856	1.79085	0.00391437
			14.111	0.000223788	1.7903	0.00391317
			14.1151	0.0002237	1.7896	0.00391164
			14.1192	0.000223582	1.78866	0.00390957
			14.1233	0.000223463	1.7877	0.00390748
			14.1274	0.000223355	1.78684	0.00390559
			14.1315	0.000223251	1.78601	0.00390379
			14.1356	0.000223168	1.78534	0.00390232
			14.1397	0.000223106	1.78485	0.00390124
			14.1438	0.000223037	1.7843	0.00390004
			14.1479	0.000222958	1.78366	0.00389866
			14.1519	0.000222866	1.78292	0.00389704
			14.156	0.000222745	1.78196	0.00389494
			14.1601	0.000222588	1.7807	0.00389218
			14.1642	0.000222431	1.77945	0.00388945
			14.1683	0.000222302	1.77841	0.00388718
			14.1724	0.000222205	1.77764	0.00388549
			14.1765	0.000222125	1.777	0.00388409
			14.1806	0.000222045	1.77636	0.0038827
			14.1847	0.000221963	1.77571	0.00388127
			14.1888	0.000221868	1.77494	0.0038796
			14.1929	0.000221753	1.77402	0.00387759
			14.197	0.000221636	1.77308	0.00387554
			14.2011	0.000221509	1.77207	0.00387332
			14.2052	0.000221377	1.77102	0.00387102
			14.2093	0.000221254	1.77003	0.00386887
			14.2134	0.000221132	1.76906	0.00386674
			14.2175	0.000221015	1.76812	0.00386468
			14.2216	0.000220904	1.76723	0.00386274
			14.2257	0.000220797	1.76637	0.00386087
			14.2297	0.000220703	1.76562	0.00385922
			14.2338	0.000220625	1.765	0.00385786
			14.2379	0.000220549	1.76439	0.00385653
			14.242	0.000220486	1.76389	0.00385543
			14.2461	0.000220446	1.76357	0.00385473
			14.2502	0.000220405	1.76324	0.00385402
			14.2543	0.00022035	1.7628	0.00385306
			14.2584	0.000220291	1.76233	0.00385202
			14.2625	0.000220246	1.76197	0.00385124
			14.2666	0.000220217	1.76174	0.00385074
			14.2707	0.000220192	1.76154	0.0038503
			14.2748	0.000220168	1.76135	0.00384988
			14.2789	0.000220139	1.76111	0.00384937
			14.283	0.0002201	1.7608	0.00384868
			14.2871	0.000220051	1.76041	0.00384783
			14.2912	0.000219984	1.75987	0.00384665
			14.2953	0.000219886	1.75909	0.00384494
			14.2994	0.000219772	1.75818	0.00384295
			14.3035	0.000219639	1.75711	0.00384063
			14.3076	0.000219488	1.7559	0.00383798
			14.3116	0.000219361	1.75489	0.00383576
			14.3157	0.000219269	1.75415	0.00383415
			14.3198	0.00021918	1.75344	0.00383261
			14.3239	0.000219091	1.75273	0.00383104
			14.328	0.000218999	1.75199	0.00382943
			14.3321	0.000218889	1.75111	0.00382751
			14.3362	0.000218753	1.75002	0.00382513
			14.3403	0.000218603	1.74883	0.00382251
			14.3444	0.00021845	1.7476	0.00381983
			14.3485	0.000218302	1.74642	0.00381725
			14.3526	0.000218156	1.74525	0.0038147
			14.3567	0.000218006	1.74405	0.00381208
			14.3608	0.00021786	1.74288	0.00380952
			14.3649	0.000217739	1.74191	0.00380739
			14.369	0.000217632	1.74106	0.00380553
			14.3731	0.000217528	1.74022	0.0038037
			14.3772	0.000217417	1.73934	0.00380177
			14.3813	0.000217336	1.73869	0.00380036
			14.3854	0.0002173	1.7384	0.00379972
			14.3895	0.000217258	1.73806	0.00379899
			14.3935	0.000217207	1.73766	0.0037981
			14.3976	0.00021714	1.73712	0.00379692
			14.4017	0.00021644	1.73152	0.00378469
			14.4058	0.00021488	1.71904	0.0037574
			14.4099	0.00021402	1.71216	0.00374237
			14.414	0.000214099	1.71279	0.00374375
			14.4181	0.000214196	1.71357	0.00374545
			14.4222	0.000214312	1.7145	0.00374748
			14.4263	0.000214425	1.7154	0.00374945
			14.4304	0.000214524	1.71619	0.00375118
			14.4345	0.000214607	1.71686	0.00375264
			14.4386	0.000214671	1.71737	0.00375375
			14.4427	0.000214713	1.7177	0.00375449
			14.4468	0.000214727	1.71782	0.00375474
			14.4509	0.000214726	1.7178	0.00375471
			14.455	0.000214743	1.71794	0.00375501
			14.4591	0.000214779	1.71823	0.00375564
			14.4632	0.000214816	1.71852	0.00375628
			14.4673	0.000214841	1.71873	0.00375672
			14.4713	0.00021486	1.71888	0.00375707
			14.4754	0.000214878	1.71902	0.00375737
			14.4795	0.000214886	1.71909	0.00375752
			14.4836	0.000214881	1.71905	0.00375743
			14.4877	0.000214862	1.7189	0.00375709
			14.4918	0.000214838	1.71871	0.00375668
			14.4959	0.000214799	1.71839	0.00375599
			14.5	0.000214734	1.71787	0.00375485
			14.5041	0.000214651	1.71721	0.00375341
			14.5082	0.000214559	1.71647	0.0037518
			14.5123	0.000214466	1.71573	0.00375017
			14.5164	0.00021437	1.71496	0.00374849
			14.5205	0.000214285	1.71428	0.003747
			14.5246	0.000214222	1.71378	0.0037459
			14.5287	0.000214168	1.71335	0.00374497
			14.5328	0.000214114	1.71291	0.00374401
			14.5369	0.000214055	1.71244	0.00374297
			14.541	0.000213987	1.7119	0.00374179
			14.5451	0.000213912	1.7113	0.00374049
			14.5492	0.00021384	1.71072	0.00373923
			14.5532	0.000213769	1.71015	0.00373797
			14.5573	0.000213696	1.70957	0.0037367
			14.5614	0.000213619	1.70895	0.00373536
			14.5655	0.000213532	1.70825	0.00373383
			14.5696	0.000213427	1.70742	0.003732
			14.5737	0.000213319	1.70655	0.00373011
			14.5778	0.000213216	1.70573	0.00372831
			14.5819	0.000213113	1.7049	0.00372651
			14.586	0.00021298	1.70384	0.00372418
			14.5901	0.000212823	1.70259	0.00372145
			14.5942	0.000212728	1.70183	0.00371979
			14.5983	0.000212679	1.70144	0.00371893
			14.6024	0.000212642	1.70113	0.00371826
			14.6065	0.000212622	1.70098	0.00371793
			14.6106	0.000212601	1.70081	0.00371755
			14.6147	0.000212573	1.70058	0.00371706
			14.6188	0.000212536	1.70029	0.00371642
			14.6229	0.000212472	1.69977	0.00371529
			14.627	0.000212379	1.69903	0.00371367
			14.631	0.000212288	1.69831	0.00371209
			14.6351	0.000212198	1.69758	0.0037105
			14.6392	0.000212114	1.69691	0.00370903
			14.6433	0.00021204	1.69632	0.00370776
			14.6474	0.000211963	1.69571	0.0037064
			14.6515	0.000211871	1.69497	0.00370479
			14.6556	0.000211771	1.69417	0.00370304
			14.6597	0.000211702	1.69362	0.00370184
			14.6638	0.000211679	1.69343	0.00370144
			14.6679	0.000211653	1.69323	0.00370099
			14.672	0.000211619	1.69295	0.00370039
			14.6761	0.000211568	1.69255	0.0036995
			14.6802	0.000211502	1.69202	0.00369834
			14.6843	0.000211438	1.6915	0.00369722
			14.6884	0.000211365	1.69092	0.00369594
			14.6925	0.000211273	1.69019	0.00369434
			14.6966	0.000211182	1.68946	0.00369274
			14.7007	0.000211118	1.68895	0.00369163
			14.7048	0.000211077	1.68861	0.0036909
			14.7089	0.000211042	1.68834	0.0036903
			14.7129	0.000211003	1.68803	0.00368962
			14.717	0.000210954	1.68763	0.00368875
			14.7211	0.00021089	1.68712	0.00368764
			14.7252	0.000210802	1.68641	0.0036861
			14.7293	0.000210715	1.68572	0.00368458
			14.7334	0.000210669	1.68535	0.00368377
			14.7375	0.000210631	1.68505	0.0036831
			14.7416	0.000210577	1.68461	0.00368216
			14.7457	0.000210502	1.68401	0.00368085
			14.7498	0.000210388	1.68311	0.00367887
			14.7539	0.000210248	1.68198	0.00367641
			14.758	0.000210114	1.68091	0.00367407
			14.7621	0.000209985	1.67988	0.00367181
			14.7662	0.00020986	1.67888	0.00366963
			14.7703	0.000209739	1.67791	0.00366752
			14.7744	0.000209616	1.67693	0.00366536
			14.7785	0.000209493	1.67594	0.0036632
			14.7826	0.000209391	1.67513	0.00366142
			14.7867	0.000209313	1.67451	0.00366007
			14.7907	0.000209229	1.67383	0.00365859
			14.7948	0.000209133	1.67307	0.00365692
			14.7989	0.000209029	1.67223	0.0036551
			14.803	0.000208931	1.67145	0.00365339
			14.8071	0.000208842	1.67074	0.00365183
			14.8112	0.000208751	1.67001	0.00365024
			14.8153	0.000208658	1.66926	0.00364861
			14.8194	0.000208553	1.66842	0.00364677
			14.8235	0.000208432	1.66745	0.00364465
			14.8276	0.000208317	1.66653	0.00364264
			14.8317	0.000208216	1.66572	0.00364087
			14.8358	0.000208119	1.66495	0.00363918
			14.8399	0.000208023	1.66418	0.00363751
			14.844	0.000207927	1.66342	0.00363583
			14.8481	0.000207822	1.66257	0.00363398
			14.8522	0.000207697	1.66157	0.0036318
			14.8563	0.000207564	1.66051	0.00362947
			14.8604	0.000207433	1.65946	0.00362719
			14.8645	0.000207304	1.65843	0.00362493
			14.8686	0.000207176	1.65741	0.00362269
			14.8726	0.000207048	1.65638	0.00362045
			14.8767	0.000206921	1.65537	0.00361824
			14.8808	0.000206798	1.65439	0.00361609
			14.8849	0.000206692	1.65353	0.00361422
			14.889	0.000206606	1.65284	0.00361272
			14.8931	0.000206518	1.65214	0.00361119
			14.8972	0.000206419	1.65135	0.00360946
			14.9013	0.000206303	1.65042	0.00360742
			14.9054	0.000206166	1.64933	0.00360504
			14.9095	0.000206024	1.64819	0.00360255
			14.9136	0.000205882	1.64706	0.00360007
			14.9177	0.000205734	1.64587	0.00359748
			14.9218	0.000205583	1.64466	0.00359484
			14.9259	0.000205442	1.64353	0.00359237
			14.93	0.000205304	1.64243	0.00358996
			14.9341	0.000205164	1.64132	0.00358752
			14.9382	0.000205033	1.64026	0.00358522
			14.9423	0.000204936	1.63949	0.00358353
			14.9464	0.000204878	1.63902	0.00358251
			14.9505	0.000204831	1.63865	0.00358169
			14.9545	0.000204784	1.63827	0.00358087
			14.9586	0.000204729	1.63783	0.00357991
			14.9627	0.000204663	1.6373	0.00357875
			14.9668	0.000204578	1.63663	0.00357727
			14.9709	0.000204464	1.63571	0.00357527
			14.975	0.000204311	1.63449	0.00357261
			14.9791	0.000204189	1.63351	0.00357046
			14.9832	0.000204132	1.63306	0.00356947
			14.9873	0.000204071	1.63257	0.0035684
			14.9914	0.000204004	1.63203	0.00356723
			14.9955	0.000203932	1.63145	0.00356597
			14.9996	0.00020386	1.63088	0.00356471
			15.0037	0.000203787	1.63029	0.00356343
			15.0078	0.000203706	1.62965	0.00356202
			15.0119	0.000203629	1.62903	0.00356067
			15.016	0.000203573	1.62859	0.0035597
			15.0201	0.000203523	1.62818	0.00355881
			15.0242	0.000203472	1.62777	0.00355792
			15.0283	0.000203419	1.62735	0.00355699
			15.0323	0.000203358	1.62686	0.00355593
			15.0364	0.000203279	1.62623	0.00355456
			15.0405	0.000203172	1.62538	0.00355269
			15.0446	0.000203034	1.62427	0.00355027
			15.0487	0.000202896	1.62317	0.00354786
			15.0528	0.000202779	1.62224	0.00354582
			15.0569	0.000202671	1.62137	0.00354392
			15.061	0.000202573	1.62059	0.00354221
			15.0651	0.000202485	1.61988	0.00354066
			15.0692	0.000202397	1.61917	0.00353912
			15.0733	0.000202306	1.61844	0.00353753
			15.0774	0.00020221	1.61768	0.00353585
			15.0815	0.000202109	1.61687	0.00353409
			15.0856	0.000202014	1.61611	0.00353243
			15.0897	0.000201928	1.61543	0.00353093
			15.0938	0.000201843	1.61474	0.00352943
			15.0979	0.000201753	1.61402	0.00352787
			15.102	0.00020166	1.61328	0.00352624
			15.1061	0.000201563	1.6125	0.00352454
			15.1102	0.000201459	1.61167	0.00352272
			15.1142	0.000201336	1.61069	0.00352058
			15.1183	0.000201203	1.60963	0.00351826
			15.1224	0.000201083	1.60866	0.00351615
			15.1265	0.000200964	1.60771	0.00351407
			15.1306	0.000200843	1.60674	0.00351195
			15.1347	0.000200714	1.60571	0.0035097
			15.1388	0.000200592	1.60473	0.00350756
			15.1429	0.000200497	1.60398	0.00350591
			15.147	0.000200419	1.60335	0.00350454
			15.1511	0.000200348	1.60278	0.00350329
			15.1552	0.00020027	1.60216	0.00350193
			15.1593	0.000200182	1.60146	0.0035004
			15.1634	0.000200094	1.60075	0.00349885
			15.1675	0.000200027	1.60022	0.00349769
			15.1716	0.000199978	1.59982	0.00349683
			15.1757	0.000199928	1.59942	0.00349595
			15.1798	0.000199871	1.59897	0.00349496
			15.1839	0.000199797	1.59837	0.00349366
			15.188	0.000199722	1.59778	0.00349236
			15.192	0.000199682	1.59746	0.00349166
			15.1961	0.000199645	1.59716	0.00349101
			15.2002	0.000199601	1.59681	0.00349024
			15.2043	0.000199532	1.59626	0.00348903
			15.2084	0.00019942	1.59536	0.00348708
			15.2125	0.000199299	1.59439	0.00348495
			15.2166	0.000199194	1.59355	0.00348312
			15.2207	0.000199112	1.5929	0.00348169
			15.2248	0.000199078	1.59262	0.00348109
			15.2289	0.000199078	1.59263	0.0034811
			15.233	0.000199077	1.59261	0.00348107
			15.2371	0.000199051	1.59241	0.00348062
			15.2412	0.000199008	1.59207	0.00347988
			15.2453	0.000198962	1.59169	0.00347906
			15.2494	0.000198907	1.59125	0.0034781
			15.2535	0.000198828	1.59063	0.00347672
			15.2576	0.000198726	1.58981	0.00347494
			15.2617	0.000198621	1.58897	0.0034731
			15.2658	0.000198506	1.58805	0.00347109
			15.2699	0.000198386	1.58709	0.003469
			15.2739	0.000198284	1.58627	0.0034672
			15.278	0.000198194	1.58555	0.00346564
			15.2821	0.000198109	1.58487	0.00346415
			15.2862	0.000198022	1.58418	0.00346263
			15.2903	0.000197931	1.58345	0.00346104
			15.2944	0.000197851	1.58281	0.00345964
			15.2985	0.000197798	1.58238	0.00345871
			15.3026	0.00019775	1.582	0.00345786
			15.3067	0.0001977	1.5816	0.003457
			15.3108	0.000197647	1.58118	0.00345607
			15.3149	0.000197586	1.58069	0.00345501
			15.319	0.000197508	1.58006	0.00345364
			15.3231	0.00019741	1.57928	0.00345192
			15.3272	0.000197308	1.57846	0.00345014
			15.3313	0.000197229	1.57783	0.00344876
			15.3354	0.000197171	1.57737	0.00344774
			15.3395	0.000197116	1.57693	0.00344678
			15.3436	0.000197063	1.5765	0.00344585
			15.3477	0.000197015	1.57612	0.00344502
			15.3517	0.000196977	1.57582	0.00344436
			15.3558	0.000196941	1.57553	0.00344373
			15.3599	0.000196903	1.57523	0.00344307
			15.364	0.000196862	1.5749	0.00344235
			15.3681	0.000196817	1.57454	0.00344156
			15.3722	0.000196752	1.57402	0.00344042
			15.3763	0.00019667	1.57336	0.00343899
			15.3804	0.000196609	1.57287	0.00343792
			15.3845	0.000196563	1.5725	0.00343711
			15.3886	0.00019652	1.57216	0.00343636
			15.3927	0.000196473	1.57178	0.00343553
			15.3968	0.00019643	1.57144	0.0034348
			15.4009	0.000196395	1.57116	0.00343419
			15.405	0.000196353	1.57082	0.00343344
			15.4091	0.000196297	1.57038	0.00343247
			15.4132	0.000196217	1.56974	0.00343107
			15.4173	0.00019611	1.56888	0.0034292
			15.4214	0.000195991	1.56793	0.00342711
			15.4255	0.000195871	1.56697	0.00342502
			15.4296	0.00019575	1.566	0.0034229
			15.4336	0.000195675	1.5654	0.00342159
			15.4377	0.000195668	1.56535	0.00342147
			15.4418	0.000195656	1.56524	0.00342125
			15.4459	0.000195634	1.56507	0.00342087
			15.45	0.000195579	1.56464	0.00341992
			15.4541	0.000195467	1.56374	0.00341795
			15.4582	0.000195324	1.56259	0.00341545
			15.4623	0.000195167	1.56134	0.00341271
			15.4664	0.000195023	1.56018	0.00341019
			15.4705	0.000194918	1.55934	0.00340835
			15.4746	0.000194806	1.55845	0.0034064
			15.4787	0.000194684	1.55747	0.00340425
			15.4828	0.000194543	1.55634	0.00340179
			15.4869	0.000194381	1.55505	0.00339896
			15.491	0.000194214	1.55371	0.00339604
			15.4951	0.000194066	1.55253	0.00339346
			15.4992	0.000193928	1.55143	0.00339104
			15.5033	0.000193806	1.55045	0.00338891
			15.5074	0.000193711	1.54969	0.00338725
			15.5115	0.000193648	1.54918	0.00338614
			15.5155	0.000193608	1.54887	0.00338545
			15.5196	0.000193576	1.54861	0.00338488
			15.5237	0.000193537	1.54829	0.0033842
			15.5278	0.00019348	1.54784	0.0033832
			15.5319	0.000193399	1.54719	0.00338179
			15.536	0.000193262	1.5461	0.0033794
			15.5401	0.000193075	1.5446	0.00337613
			15.5442	0.000192897	1.54317	0.00337301
			15.5483	0.000192725	1.5418	0.00337
			15.5524	0.000192559	1.54047	0.0033671
			15.5565	0.0001924	1.5392	0.00336433
			15.5606	0.000192249	1.53799	0.00336168
			15.5647	0.000192099	1.53679	0.00335905
			15.5688	0.000191943	1.53555	0.00335633
			15.5729	0.000191815	1.53452	0.00335408
			15.577	0.000191741	1.53393	0.00335281
			15.5811	0.000191673	1.53338	0.00335161
			15.5852	0.000191595	1.53276	0.00335024
			15.5893	0.000191493	1.53194	0.00334846
			15.5933	0.000191368	1.53094	0.00334627
			15.5974	0.000191234	1.52987	0.00334393
			15.6015	0.00019111	1.52888	0.00334177
			15.6056	0.000190995	1.52796	0.00333975
			15.6097	0.000190898	1.52719	0.00333806
			15.6138	0.000190821	1.52657	0.00333672
			15.6179	0.000190744	1.52595	0.00333537
			15.622	0.000190664	1.52531	0.00333396
			15.6261	0.000190565	1.52452	0.00333223
			15.6302	0.000190443	1.52355	0.00333011
			15.6343	0.00019032	1.52256	0.00332795
			15.6384	0.000190187	1.52149	0.00332562
			15.6425	0.000190055	1.52044	0.00332332
			15.6466	0.000189945	1.51956	0.00332139
			15.6507	0.00018986	1.51888	0.00331991
			15.6548	0.000189791	1.51833	0.00331871
			15.6589	0.000189728	1.51783	0.0033176
			15.663	0.000189669	1.51735	0.00331657
			15.6671	0.000189605	1.51684	0.00331545
			15.6712	0.000189532	1.51626	0.00331417
			15.6752	0.00018943	1.51544	0.00331239
			15.6793	0.000189333	1.51466	0.00331069
			15.6834	0.000189291	1.51432	0.00330995
			15.6875	0.000189251	1.51401	0.00330927
			15.6916	0.000189201	1.51361	0.00330838
			15.6957	0.000189135	1.51308	0.00330722
			15.6998	0.000189051	1.51241	0.00330576
			15.7039	0.000188946	1.51157	0.00330392
			15.708	0.000188799	1.51039	0.00330136
			15.7121	0.00018864	1.50912	0.00329858
			15.7162	0.000188509	1.50807	0.00329628
			15.7203	0.000188378	1.50702	0.00329399
			15.7244	0.000188244	1.50595	0.00329165
			15.7285	0.000188089	1.50471	0.00328894
			15.7326	0.000187909	1.50327	0.00328578
			15.7367	0.000187732	1.50186	0.0032827
			15.7408	0.000187559	1.50047	0.00327967
			15.7449	0.00018738	1.49904	0.00327655
			15.749	0.000187209	1.49767	0.00327356
			15.753	0.000187051	1.49641	0.00327079
			15.7571	0.000186891	1.49513	0.00326798
			15.7612	0.000186724	1.49379	0.00326507
			15.7653	0.000186569	1.49255	0.00326235
			15.7694	0.000186446	1.49157	0.0032602
			15.7735	0.000186332	1.49065	0.00325821
			15.7776	0.00018622	1.48976	0.00325626
			15.7817	0.000186124	1.48899	0.00325457
			15.7858	0.000186068	1.48855	0.0032536
			15.7899	0.000186048	1.48839	0.00325326
			15.794	0.000186028	1.48822	0.00325289
			15.7981	0.000185989	1.48791	0.00325222
			15.8022	0.00018594	1.48752	0.00325136
			15.8063	0.000185885	1.48708	0.0032504
			15.8104	0.000185821	1.48657	0.00324928
			15.8145	0.00018573	1.48584	0.0032477
			15.8186	0.000185619	1.48495	0.00324575
			15.8227	0.000185525	1.4842	0.0032441
			15.8268	0.000185437	1.48349	0.00324256
			15.8309	0.000185347	1.48278	0.003241
			15.8349	0.00018525	1.482	0.00323929
			15.839	0.00018513	1.48104	0.00323719
			15.8431	0.000185001	1.48001	0.00323493
			15.8472	0.000184901	1.47921	0.0032332
			15.8513	0.000184817	1.47853	0.00323172
			15.8554	0.000184764	1.47811	0.0032308
			15.8595	0.000184747	1.47797	0.0032305
			15.8636	0.000184729	1.47783	0.00323019
			15.8677	0.000184708	1.47767	0.00322982
			15.8718	0.000184683	1.47746	0.00322938
			15.8759	0.000184653	1.47722	0.00322885
			15.88	0.000184618	1.47694	0.00322824
			15.8841	0.000184537	1.4763	0.00322683
			15.8882	0.000184402	1.47522	0.00322448
			15.8923	0.000184292	1.47434	0.00322255
			15.8964	0.0001842	1.4736	0.00322093
			15.9005	0.000184092	1.47273	0.00321904
			15.9046	0.000183939	1.47151	0.00321637
			15.9087	0.000183773	1.47019	0.00321347
			15.9128	0.000183638	1.46911	0.00321111
			15.9168	0.000183525	1.4682	0.00320914
			15.9209	0.000183418	1.46735	0.00320727
			15.925	0.000183318	1.46655	0.00320551
			15.9291	0.000183221	1.46577	0.00320381
			15.9332	0.000183119	1.46495	0.00320204
			15.9373	0.000183013	1.4641	0.00320017
			15.9414	0.0001829	1.4632	0.0031982
			15.9455	0.000182782	1.46225	0.00319614
			15.9496	0.000182661	1.46129	0.00319402
			15.9537	0.00018252	1.46016	0.00319155
			15.9578	0.00018237	1.45896	0.00318894
			15.9619	0.000182254	1.45803	0.00318691
			15.966	0.000182151	1.45721	0.0031851
			15.9701	0.00018206	1.45648	0.00318351
			15.9742	0.000181974	1.45579	0.00318201
			15.9783	0.000181884	1.45508	0.00318045
			15.9824	0.000181787	1.45429	0.00317874
			15.9865	0.000181674	1.45339	0.00317677
			15.9906	0.000181541	1.45233	0.00317443
			15.9946	0.000181399	1.45119	0.00317196
			15.9987	0.000181271	1.45016	0.00316971
			16.0028	0.000181146	1.44917	0.00316754
			16.0069	0.00018104	1.44832	0.00316568
			16.011	0.000180973	1.44778	0.0031645
			16.0151	0.000180925	1.4474	0.00316366
			16.0192	0.000180864	1.44691	0.00316261
			16.0233	0.000180786	1.44629	0.00316124
			16.0274	0.000180684	1.44547	0.00315946
			16.0315	0.000180578	1.44462	0.00315759
			16.0356	0.000180483	1.44386	0.00315594
			16.0397	0.000180388	1.4431	0.00315428
			16.0438	0.000180278	1.44222	0.00315235
			16.0479	0.000180146	1.44117	0.00315005
			16.052	0.000180017	1.44013	0.00314779
			16.0561	0.000179887	1.43909	0.00314552
			16.0602	0.000179758	1.43806	0.00314325
			16.0643	0.000179639	1.43712	0.00314119
			16.0684	0.000179539	1.43631	0.00313943
			16.0725	0.000179446	1.43557	0.00313781
			16.0765	0.000179359	1.43487	0.00313629
			16.0806	0.000179285	1.43428	0.00313499
			16.0847	0.000179235	1.43388	0.00313412
			16.0888	0.000179188	1.43351	0.0031333
			16.0929	0.000179135	1.43308	0.00313237
			16.097	0.000179074	1.43259	0.0031313
			16.1011	0.000179017	1.43213	0.0031303
			16.1052	0.000178977	1.43182	0.00312961
			16.1093	0.000178943	1.43155	0.00312902
			16.1134	0.000178917	1.43134	0.00312856
			16.1175	0.000178897	1.43118	0.0031282
			16.1216	0.000178869	1.43095	0.00312772
			16.1257	0.00017883	1.43064	0.00312703
			16.1298	0.000178771	1.43017	0.00312601
			16.1339	0.000178705	1.42964	0.00312484
			16.138	0.000178654	1.42923	0.00312396
			16.1421	0.000178605	1.42884	0.0031231
			16.1462	0.000178553	1.42843	0.00312219
			16.1503	0.000178492	1.42794	0.00312112
			16.1543	0.000178418	1.42735	0.00311984
			16.1584	0.000178338	1.4267	0.00311843
			16.1625	0.000178262	1.42609	0.0031171
			16.1666	0.000178189	1.42551	0.00311582
			16.1707	0.000178121	1.42497	0.00311464
			16.1748	0.000178054	1.42443	0.00311347
			16.1789	0.000177985	1.42388	0.00311226
			16.183	0.000177915	1.42332	0.00311104
			16.1871	0.000177844	1.42275	0.0031098
			16.1912	0.000177766	1.42213	0.00310843
			16.1953	0.000177683	1.42146	0.00310697
			16.1994	0.000177579	1.42063	0.00310515
			16.2035	0.000177447	1.41958	0.00310286
			16.2076	0.000177345	1.41876	0.00310107
			16.2117	0.000177291	1.41833	0.00310012
			16.2158	0.000177243	1.41794	0.00309928
			16.2199	0.000177189	1.41751	0.00309835
			16.224	0.000177126	1.41701	0.00309724
			16.2281	0.000177053	1.41643	0.00309597
			16.2322	0.000176964	1.41571	0.0030944
			16.2362	0.000176858	1.41486	0.00309255
			16.2403	0.000176767	1.41413	0.00309096
			16.2444	0.000176695	1.41356	0.0030897
			16.2485	0.000176618	1.41294	0.00308835
			16.2526	0.000176508	1.41206	0.00308642
			16.2567	0.000176342	1.41074	0.00308354
			16.2608	0.000176191	1.40952	0.00308088
			16.2649	0.000176084	1.40867	0.00307902
			16.269	0.00017598	1.40784	0.0030772
			16.2731	0.000175893	1.40714	0.00307568
			16.2772	0.000175837	1.4067	0.0030747
			16.2813	0.000175793	1.40635	0.00307394
			16.2854	0.000175747	1.40598	0.00307312
			16.2895	0.000175688	1.40551	0.0030721
			16.2936	0.000175597	1.40477	0.0030705
			16.2977	0.000175481	1.40385	0.00306848
			16.3018	0.000175372	1.40298	0.00306657
			16.3059	0.000175267	1.40214	0.00306474
			16.31	0.000175167	1.40134	0.00306299
			16.314	0.000175066	1.40053	0.00306122
			16.3181	0.000174955	1.39964	0.00305928
			16.3222	0.000174825	1.3986	0.003057
			16.3263	0.000174681	1.39745	0.00305449
			16.3304	0.000174558	1.39646	0.00305233
			16.3345	0.000174448	1.39558	0.0030504
			16.3386	0.000174337	1.3947	0.00304847
			16.3427	0.00017422	1.39376	0.00304643
			16.3468	0.000174105	1.39284	0.00304441
			16.3509	0.000173995	1.39196	0.00304249
			16.355	0.000173883	1.39107	0.00304053
			16.3591	0.000173762	1.3901	0.00303841
			16.3632	0.000173637	1.3891	0.00303623
			16.3673	0.00017353	1.38824	0.00303436
			16.3714	0.000173431	1.38745	0.00303263
			16.3755	0.00017333	1.38664	0.00303086
			16.3796	0.000173248	1.38598	0.00302942
			16.3837	0.000173194	1.38555	0.00302849
			16.3878	0.000173138	1.3851	0.0030275
			16.3919	0.000173075	1.3846	0.0030264
			16.3959	0.000172997	1.38397	0.00302503
			16.4	0.000172904	1.38324	0.00302342
			16.4041	0.000172808	1.38246	0.00302173
			16.4082	0.000172702	1.38162	0.00301988
			16.4123	0.000172597	1.38078	0.00301805
			16.4164	0.000172529	1.38023	0.00301686
			16.4205	0.000172497	1.37998	0.0030163
			16.4246	0.000172468	1.37974	0.00301579
			16.4287	0.000172425	1.3794	0.00301504
			16.4328	0.000172365	1.37892	0.00301399
			16.4369	0.000172289	1.37831	0.00301266
			16.441	0.000172207	1.37766	0.00301123
			16.4451	0.000172107	1.37686	0.00300948
			16.4492	0.000171984	1.37587	0.00300732
			16.4533	0.000171855	1.37484	0.00300506
			16.4574	0.000171715	1.37372	0.00300262
			16.4615	0.000171572	1.37258	0.00300013
			16.4656	0.00017146	1.37168	0.00299817
			16.4697	0.000171373	1.37099	0.00299665
			16.4738	0.000171284	1.37027	0.00299508
			16.4778	0.000171186	1.36949	0.00299337
			16.4819	0.000171085	1.36868	0.00299161
			16.486	0.000171	1.368	0.00299012
			16.4901	0.000170933	1.36747	0.00298895
			16.4942	0.000170866	1.36693	0.00298777
			16.4983	0.000170806	1.36645	0.00298672
			16.5024	0.000170763	1.36611	0.00298598
			16.5065	0.000170732	1.36586	0.00298544
			16.5106	0.000170699	1.36559	0.00298485
			16.5147	0.000170652	1.36521	0.00298403
			16.5188	0.000170589	1.36471	0.00298293
			16.5229	0.000170534	1.36428	0.00298198
			16.527	0.000170507	1.36406	0.00298151
			16.5311	0.000170475	1.3638	0.00298093
			16.5352	0.000170432	1.36346	0.00298019
			16.5393	0.000170379	1.36303	0.00297926
			16.5434	0.000170319	1.36255	0.00297821
			16.5475	0.000170261	1.36209	0.00297719
			16.5516	0.000170204	1.36164	0.00297621
			16.5556	0.000170151	1.36121	0.00297527
			16.5597	0.0001701	1.3608	0.00297438
			16.5638	0.000170045	1.36036	0.00297341
			16.5679	0.000169979	1.35984	0.00297227
			16.572	0.000169908	1.35926	0.00297102
			16.5761	0.000169833	1.35866	0.00296971
			16.5802	0.000169753	1.35803	0.00296832
			16.5843	0.000169662	1.35729	0.00296672
			16.5884	0.000169544	1.35635	0.00296466
			16.5925	0.000169407	1.35525	0.00296226
			16.5966	0.000169265	1.35412	0.00295977
			16.6007	0.000169114	1.35291	0.00295713
			16.6048	0.000168951	1.35161	0.00295429
			16.6089	0.000168806	1.35045	0.00295175
			16.613	0.000168703	1.34962	0.00294995
			16.6171	0.000168623	1.34899	0.00294856
			16.6212	0.000168557	1.34845	0.0029474
			16.6253	0.000168511	1.34809	0.00294659
			16.6294	0.000168487	1.3479	0.00294618
			16.6335	0.000168468	1.34775	0.00294585
			16.6375	0.000168442	1.34754	0.00294539
			16.6416	0.000168398	1.34718	0.00294461
			16.6457	0.000168322	1.34658	0.00294329
			16.6498	0.000168225	1.3458	0.00294159
			16.6539	0.000168097	1.34478	0.00293936
			16.658	0.000167931	1.34345	0.00293646
			16.6621	0.000167761	1.34208	0.00293347
			16.6662	0.000167612	1.34089	0.00293087
			16.6703	0.000167468	1.33975	0.00292836
			16.6744	0.00016735	1.3388	0.0029263
			16.6785	0.000167276	1.33821	0.002925
			16.6826	0.000167226	1.33781	0.00292413
			16.6867	0.000167174	1.3374	0.00292322
			16.6908	0.000167099	1.33679	0.00292191
			16.6949	0.000167013	1.3361	0.0029204
			16.699	0.000166926	1.33541	0.00291888
			16.7031	0.000166828	1.33462	0.00291717
			16.7072	0.000166714	1.33372	0.00291518
			16.7113	0.000166569	1.33255	0.00291264
			16.7153	0.000166407	1.33125	0.0029098
			16.7194	0.00016627	1.33016	0.00290741
			16.7235	0.000166152	1.32922	0.00290535
			16.7276	0.000166044	1.32835	0.00290346
			16.7317	0.000165959	1.32767	0.00290198
			16.7358	0.000165901	1.32721	0.00290096
			16.7399	0.000165843	1.32674	0.00289994
			16.744	0.000165781	1.32625	0.00289886
			16.7481	0.000165698	1.32559	0.00289741
			16.7522	0.00016559	1.32472	0.00289551
			16.7563	0.000165484	1.32387	0.00289367
			16.7604	0.000165379	1.32303	0.00289183
			16.7645	0.00016528	1.32224	0.0028901
			16.7686	0.000165203	1.32163	0.00288876
			16.7727	0.000165151	1.32121	0.00288785
			16.7768	0.000165111	1.32089	0.00288715
			16.7809	0.000165647	1.32517	0.00289651
			16.785	0.000167707	1.34166	0.00293254
			16.7891	0.00017078	1.36624	0.00298627
			16.7932	0.000173804	1.39043	0.00303915
			16.7972	0.000176711	1.41369	0.00308999
			16.8013	0.00017949	1.43592	0.00313857
			16.8054	0.000182112	1.4569	0.00318443
			16.8095	0.000184579	1.47663	0.00322756
			16.8136	0.000186894	1.49515	0.00326804
			16.8177	0.000189065	1.51252	0.00330601
			16.8218	0.000191101	1.52881	0.0033416
			16.8259	0.000192995	1.54396	0.00337473
			16.83	0.000194742	1.55793	0.00340526
			16.8341	0.000196335	1.57068	0.00343313
			16.8382	0.000197847	1.58277	0.00345956
			16.8423	0.000199331	1.59465	0.00348552
			16.8464	0.000200748	1.60598	0.0035103
			16.8505	0.000202078	1.61662	0.00353354
			16.8546	0.000203318	1.62654	0.00355523
			16.8587	0.000204473	1.63579	0.00357544
			16.8628	0.000205562	1.64449	0.00359447
			16.8669	0.000206583	1.65267	0.00361233
			16.871	0.00020754	1.66032	0.00362906
			16.875	0.000208433	1.66747	0.00364468
			16.8791	0.00020926	1.67408	0.00365913
			16.8832	0.000210025	1.6802	0.00367252
			16.8873	0.000210747	1.68598	0.00368514
			16.8914	0.000211423	1.69138	0.00369696
			16.8955	0.000212056	1.69645	0.00370803
			16.8996	0.000212648	1.70119	0.00371839
			16.9037	0.000213197	1.70558	0.00372798
			16.9078	0.00021372	1.70976	0.00373712
			16.9119	0.000214228	1.71382	0.00374601
			16.916	0.000214706	1.71764	0.00375436
			16.9201	0.000215153	1.72123	0.00376219
			16.9242	0.000215574	1.72459	0.00376954
			16.9283	0.000215965	1.72772	0.00377637
			16.9324	0.000216322	1.73058	0.00378263
			16.9365	0.000216646	1.73317	0.00378828
			16.9406	0.000216948	1.73559	0.00379358
			16.9447	0.000217245	1.73796	0.00379876
			16.9488	0.000217524	1.74019	0.00380364
			16.9529	0.000217785	1.74228	0.0038082
			16.9569	0.000218035	1.74428	0.00381257
			16.961	0.000218281	1.74625	0.00381688
			16.9651	0.000218512	1.7481	0.00382092
			16.9692	0.000218724	1.74979	0.00382462
			16.9733	0.000218915	1.75132	0.00382797
			16.9774	0.000219111	1.75288	0.00383138
			16.9815	0.000219319	1.75455	0.00383503
			16.9856	0.000219502	1.75601	0.00383822
			16.9897	0.000219656	1.75724	0.00384091
			16.9938	0.000219736	1.75789	0.00384232
			16.9979	0.000219741	1.75793	0.00384242
			17.002	0.000219748	1.75798	0.00384252
			17.0061	0.000219751	1.75801	0.00384258
			17.0102	0.000219761	1.75809	0.00384275
			17.0143	0.000219786	1.75828	0.00384319
			17.0184	0.000219816	1.75853	0.00384372
			17.0225	0.000219861	1.75889	0.00384451
			17.0266	0.000220326	1.76261	0.00385264
			17.0307	0.000222063	1.77651	0.00388302
			17.0348	0.000224875	1.799	0.00393218
			17.0388	0.00022779	1.82232	0.00398316
			17.0429	0.000230695	1.84556	0.00403395
			17.047	0.000233553	1.86843	0.00408393
			17.0511	0.000236285	1.89028	0.00413169
			17.0552	0.000238853	1.91083	0.00417661
			17.0593	0.000241265	1.93012	0.00421878
			17.0634	0.000243522	1.94818	0.00425825
			17.0675	0.000245639	1.96511	0.00429526
			17.0716	0.000247635	1.98108	0.00433016
			17.0757	0.000249515	1.99612	0.00436303
			17.0798	0.000251295	2.01036	0.00439416
			17.0839	0.00025301	2.02408	0.00442415
			17.088	0.000255194	2.04155	0.00446233
			17.0921	0.000258729	2.06983	0.00452416
			17.0962	0.000263164	2.10531	0.00460171
			17.1003	0.000267508	2.14006	0.00467766
			17.1044	0.000271668	2.17334	0.00475041
			17.1085	0.00027561	2.20488	0.00481933
			17.1126	0.000279346	2.23477	0.00488466
			17.1166	0.000282892	2.26314	0.00494667
			17.1207	0.000286262	2.29009	0.00500559
			17.1248	0.000289918	2.31934	0.00506953
			17.1289	0.000294772	2.35818	0.00515441
			17.133	0.000300537	2.40429	0.00525521
			17.1371	0.000306207	2.44966	0.00535436
			17.1412	0.000311648	2.49319	0.00544951
			17.1453	0.000316809	2.53447	0.00553974
			17.1494	0.000321693	2.57354	0.00562515
			17.1535	0.000326909	2.61527	0.00571636
			17.1576	0.000333411	2.66729	0.00583005
			17.1617	0.000340678	2.72542	0.00595712
			17.1658	0.000347709	2.78167	0.00608007
			17.1699	0.000354347	2.83477	0.00619613
			17.174	0.000361177	2.88942	0.00631557
			17.1781	0.000369164	2.95332	0.00645524
			17.1822	0.000377908	3.02326	0.00660813
			17.1863	0.000386413	3.09131	0.00675685
			17.1904	0.00039449	3.15592	0.00689808
			17.1945	0.000402823	3.22259	0.0070438
			17.1985	0.000412355	3.29884	0.00721046
			17.2026	0.000422343	3.37874	0.00738511
			17.2067	0.000431799	3.45439	0.00755047
			17.2108	0.000441447	3.53158	0.00771918
			17.2149	0.000452255	3.61804	0.00790816
			17.219	0.000463479	3.70783	0.00810443
			17.2231	0.000474419	3.79535	0.00829572
			17.2272	0.000485905	3.88724	0.00849657
			17.2313	0.0004982	3.9856	0.00871157
			17.2354	0.000510637	4.0851	0.00892904
			17.2395	0.000523384	4.18707	0.00915193
			17.2436	0.000536919	4.29535	0.0093886
			17.2477	0.000550565	4.40452	0.00962722
			17.2518	0.000564393	4.51514	0.00986901
			17.2559	0.000579096	4.63277	0.0101261
			17.26	0.000594285	4.75428	0.0103917
			17.2641	0.000609957	4.87965	0.0106657
			17.2682	0.000626062	5.0085	0.0109474
			17.2723	0.00064239	5.13912	0.0112329
			17.2763	0.000659534	5.27627	0.0115327
			17.2804	0.000677273	5.41819	0.0118428
			17.2845	0.000695479	5.56383	0.0121612
			17.2886	0.000714201	5.71361	0.0124886
			17.2927	0.000733383	5.86707	0.012824
			17.2968	0.000753218	6.02574	0.0131708
			17.3009	0.000773564	6.18851	0.0135266
			17.305	0.000794531	6.35625	0.0138932
			17.3091	0.000816099	6.52879	0.0142704
			17.3132	0.000838231	6.70585	0.0146574
			17.3173	0.000860961	6.88769	0.0150548
			17.3214	0.000884351	7.07481	0.0154638
			17.3255	0.000908398	7.26719	0.0158843
			17.3296	0.000933008	7.46407	0.0163147
			17.3337	0.00095838	7.66704	0.0167583
			17.3378	0.000984405	7.87524	0.0172134
			17.3419	0.00101101	8.08811	0.0176787
			17.346	0.00103811	8.30487	0.0181525
			17.3501	0.00106585	8.52683	0.0186376
			17.3542	0.00109462	8.75696	0.0191406
			17.3582	0.00112389	8.99108	0.0196523
			17.3623	0.00115366	9.22928	0.020173
			17.3664	0.00118437	9.47498	0.02071
			17.3705	0.00121569	9.72551	0.0212576
			17.3746	0.0012477	9.9816	0.0218174
			17.3787	0.00128086	10.2469	0.0223972
			17.3828	0.001315	10.52	0.0229941
			17.3869	0.00134972	10.7977	0.0236013
			17.391	0.00138501	11.0801	0.0242184
			17.3951	0.00142124	11.3699	0.0248519
			17.3992	0.00145871	11.6697	0.0255071
			17.4033	0.00149734	11.9787	0.0261826
			17.4074	0.00153689	12.2951	0.0268741
			17.4115	0.0015772	12.6176	0.027579
			17.4156	0.00161835	12.9468	0.0282986
			17.4197	0.00166048	13.2839	0.0290353
			17.4238	0.00170362	13.6289	0.0297896
			17.4279	0.00174781	13.9825	0.0305623
			17.432	0.00179306	14.3444	0.0313535
			17.436	0.00183951	14.7161	0.0321658
			17.4401	0.00188724	15.098	0.0330005
			17.4442	0.00193618	15.4895	0.0338562
			17.4483	0.00198624	15.89	0.0347316
			17.4524	0.00203748	16.2999	0.0356276
			17.4565	0.00209008	16.7207	0.0365473
			17.4606	0.00214406	17.1525	0.0374912
			17.4647	0.00219952	17.5961	0.0384609
			17.4688	0.00225655	18.0524	0.0394582
			17.4729	0.00231508	18.5206	0.0404817
			17.477	0.00237493	18.9994	0.0415282
			17.4811	0.0024362	19.4896	0.0425996
			17.4852	0.00249911	19.9929	0.0436997
			17.4893	0.00256384	20.5107	0.0448315
			17.4934	0.00263036	21.0429	0.0459947
			17.4975	0.00269849	21.588	0.0471861
			17.5016	0.00276813	22.1451	0.0484038
			17.5057	0.00283954	22.7163	0.0496523
			17.5098	0.00291298	23.3038	0.0509366
			17.5139	0.00298838	23.907	0.052255
			17.5179	0.00306574	24.5259	0.0536077
			17.522	0.00314522	25.1618	0.0549976
			17.5261	0.00322722	25.8178	0.0564315
			17.5302	0.00331174	26.4939	0.0579094
			17.5343	0.00339855	27.1884	0.0594273
			17.5384	0.00348789	27.9031	0.0609895
			17.5425	0.00357991	28.6393	0.0625986
			17.5466	0.00367458	29.3967	0.0642541
			17.5507	0.00377181	30.1745	0.0659542
			17.5548	0.0038718	30.9744	0.0677025
			17.5589	0.00397484	31.7987	0.0695044
			17.563	0.00408075	32.646	0.0713562
			17.5671	0.00418932	33.5146	0.0732548
			17.5712	0.00430079	34.4063	0.0752039
			17.5753	0.0044156	35.3248	0.0772115
			17.5794	0.00453381	36.2705	0.0792786
			17.5835	0.0046556	37.2448	0.0814081
			17.5876	0.00478118	38.2495	0.0836041
			17.5917	0.0049103	39.2824	0.085862
			17.5958	0.00504273	40.3418	0.0881775
			17.5998	0.00517855	41.4284	0.0905525
			17.6039	0.00531809	42.5447	0.0929926
			17.608	0.00546192	43.6954	0.0955076
			17.6121	0.00561042	44.8834	0.0981042
			17.6162	0.00576345	46.1076	0.10078
			17.6203	0.00592074	47.3659	0.10353
			17.6244	0.0060821	48.6568	0.106352
			17.6285	0.00624766	49.9813	0.109247
			17.6326	0.00641771	51.3417	0.112221
			17.6367	0.00659266	52.7412	0.11528
			17.6408	0.00677278	54.1823	0.118429
			17.6449	0.00695803	55.6642	0.121669
			17.649	0.00714843	57.1875	0.124998
			17.6531	0.007344	58.752	0.128418
			17.6572	0.00754479	60.3583	0.131929
			17.6613	0.00775102	62.0082	0.135535
			17.6654	0.00796288	63.703	0.139239
			17.6695	0.00818032	65.4426	0.143042
			17.6736	0.00840333	67.2266	0.146941
			17.6776	0.00863192	69.0554	0.150938
			17.6817	0.00886662	70.933	0.155042
			17.6858	0.00910764	72.8611	0.159257
			17.6899	0.00935464	74.8371	0.163576
			17.694	0.00960751	76.8601	0.167998
			17.6981	0.00986588	78.927	0.172516
			17.7022	0.0101304	81.043	0.17714
			17.7063	0.0104018	83.2144	0.181887
			17.7104	0.0106797	85.4373	0.186745
			17.7145	0.0109635	87.7077	0.191708
			17.7186	0.0112533	90.0265	0.196776
			17.7227	0.0115498	92.3987	0.201961
			17.7268	0.0118531	94.825	0.207265
			17.7309	0.012163	97.3041	0.212683
			17.735	0.0124796	99.8368	0.218219
			17.7391	0.012803	102.424	0.223874
			17.7432	0.0131329	105.063	0.229643
			17.7473	0.0134693	107.754	0.235525
			17.7514	0.0138128	110.502	0.241532
			17.7555	0.0141637	113.309	0.247667
			17.7595	0.0145213	116.17	0.25392
			17.7636	0.0148854	119.083	0.260287
			17.7677	0.0152562	122.049	0.266771
			17.7718	0.0156333	125.067	0.273366
			17.7759	0.0160169	128.135	0.280072
			17.78	0.016407	131.256	0.286893
			17.7841	0.0168035	134.428	0.293828
			17.7882	0.0172063	137.651	0.300871
			17.7923	0.0176153	140.922	0.308022
			17.7964	0.0180302	144.242	0.315278
			17.8005	0.0184512	147.61	0.32264
			17.8046	0.0188787	151.03	0.330114
			17.8087	0.0193124	154.499	0.337698
			17.8128	0.0197521	158.017	0.345387
			17.8169	0.0201979	161.583	0.353181
			17.821	0.0206495	165.196	0.361078
			17.8251	0.0211063	168.85	0.369066
			17.8292	0.0215683	172.546	0.377144
			17.8333	0.0220359	176.287	0.385322
			17.8373	0.0225086	180.069	0.393588
			17.8414	0.0229858	183.886	0.401931
			17.8455	0.0234673	187.738	0.410351
			17.8496	0.0239531	191.625	0.418846
			17.8537	0.024443	195.544	0.427413
			17.8578	0.0249371	199.497	0.436052
			17.8619	0.0254349	203.479	0.444756
			17.866	0.0259361	207.489	0.453521
			17.8701	0.0264405	211.524	0.46234
			17.8742	0.0269476	215.581	0.471208
			17.8783	0.0274576	219.661	0.480126
			17.8824	0.0279701	223.761	0.489087
			17.8865	0.0284846	227.876	0.498083
			17.8906	0.0290012	232.01	0.507118
			17.8947	0.0295203	236.163	0.516195
			17.8988	0.0300415	240.332	0.525307
			17.9029	0.0305637	244.51	0.53444
			17.907	0.0310867	248.694	0.543585
			17.9111	0.0316103	252.882	0.55274
			17.9152	0.0321341	257.073	0.5619
			17.9192	0.0326581	261.265	0.571062
			17.9233	0.033182	265.456	0.580222
			17.9274	0.0337053	269.642	0.589373
			17.9315	0.0342278	273.823	0.59851
			17.9356	0.0347493	277.995	0.607629
			17.9397	0.0352695	282.156	0.616726
			17.9438	0.0357882	286.305	0.625794
			17.9479	0.0363051	290.441	0.634833
			17.952	0.0368204	294.563	0.643843
			17.9561	0.0373337	298.67	0.65282
			17.9602	0.0378448	302.758	0.661756
			17.9643	0.038353	306.824	0.670643
			17.9684	0.0388582	310.866	0.679478
			17.9725	0.0393604	314.883	0.688259
			17.9766	0.0398592	318.873	0.69698
			17.9807	0.040354	322.832	0.705632
			17.9848	0.0408443	326.755	0.714207
			17.9889	0.04133	330.64	0.722699
			17.993	0.0418115	334.492	0.731118
			17.9971	0.0422888	338.31	0.739465
			18.0011	0.0427613	342.09	0.747727
			18.0052	0.0432282	345.826	0.755892
			18.0093	0.043689	349.512	0.76395
			18.0134	0.0441441	353.153	0.771907
			18.0175	0.0445936	356.749	0.779767
			18.0216	0.0450376	360.301	0.78753
			18.0257	0.0454757	363.805	0.795191
			18.0298	0.045907	367.256	0.802734
			18.0339	0.0463319	370.655	0.810163
			18.038	0.0467503	374.002	0.817479
			18.0421	0.0471619	377.295	0.824676
			18.0462	0.0475661	380.529	0.831744
			18.0503	0.0479628	383.702	0.838681
			18.0544	0.048352	386.816	0.845486
			18.0585	0.0487334	389.867	0.852156
			18.0626	0.0491071	392.857	0.85869
			18.0667	0.0494729	395.783	0.865086
			18.0708	0.0498305	398.644	0.87134
			18.0749	0.0501797	401.438	0.877447
			18.0789	0.0505206	404.164	0.883406
			18.083	0.0508528	406.822	0.889216
			18.0871	0.0511767	409.414	0.89488
			18.0912	0.0514926	411.941	0.900403
			18.0953	0.0518002	414.402	0.905782
			18.0994	0.0520996	416.797	0.911017
			18.1035	0.0523906	419.125	0.916107
			18.1076	0.0526731	421.385	0.921046
			18.1117	0.0529469	423.575	0.925833
			18.1158	0.0532121	425.697	0.930471
			18.1199	0.0534687	427.75	0.934958
			18.124	0.0537165	429.732	0.939291
			18.1281	0.0539553	431.642	0.943466
			18.1322	0.0541852	433.482	0.947487
			18.1363	0.0544065	435.252	0.951356
			18.1404	0.054619	436.952	0.955071
			18.1445	0.0548227	438.582	0.958635
			18.1486	0.0550179	440.143	0.962047
			18.1527	0.0552042	441.634	0.965305
			18.1568	0.0553816	443.053	0.968406
			18.1608	0.0555502	444.402	0.971356
			18.1649	0.0557106	445.684	0.974159
			18.169	0.0558625	446.9	0.976815
			18.1731	0.0560057	448.046	0.97932
			18.1772	0.0561401	449.121	0.981671
			18.1813	0.0562661	450.129	0.983873
			18.1854	0.0563837	451.07	0.98593
			18.1895	0.0564931	451.945	0.987842
			18.1936	0.0565941	452.752	0.989608
			18.1977	0.0566867	453.494	0.991229
			18.2018	0.0567711	454.168	0.992703
			18.2059	0.0568473	454.779	0.994037
			18.21	0.0569157	455.326	0.995233
			18.2141	0.0569762	455.81	0.99629
			18.2182	0.0570289	456.231	0.997211
			18.2223	0.057074	456.592	0.998
			18.2264	0.0571117	456.894	0.99866
			18.2305	0.0571418	457.134	0.999186
			18.2346	0.0571643	457.314	0.999579
			18.2386	0.0571795	457.436	0.999845
			18.2427	0.0571875	457.5	0.999985
			18.2468	0.0571884	457.507	1
			18.2509	0.0571824	457.459	0.999895
			18.255	0.0571696	457.357	0.999673
			18.2591	0.0571503	457.202	0.999334
			18.2632	0.0571244	456.995	0.998882
			18.2673	0.057092	456.736	0.998316
			18.2714	0.0570531	456.425	0.997635
			18.2755	0.0570077	456.062	0.996841
			18.2796	0.056956	455.648	0.995937
			18.2837	0.0568982	455.186	0.994926
			18.2878	0.0568346	454.677	0.993814
			18.2919	0.0567651	454.121	0.992599
			18.296	0.0566897	453.518	0.99128
			18.3001	0.0566086	452.869	0.989862
			18.3042	0.0565216	452.173	0.988341
			18.3083	0.0564287	451.43	0.986716
			18.3124	0.0563302	450.641	0.984993
			18.3165	0.0562264	449.811	0.983179
			18.3205	0.0561178	448.942	0.98128
			18.3246	0.0560043	448.034	0.979294
			18.3287	0.0558856	447.085	0.977221
			18.3328	0.055762	446.096	0.975058
			18.3369	0.0556336	445.069	0.972813
			18.341	0.0555004	444.003	0.970484
			18.3451	0.0553626	442.901	0.968075
			18.3492	0.0552205	441.764	0.96559
			18.3533	0.055074	440.592	0.963029
			18.3574	0.0549234	439.387	0.960395
			18.3615	0.0547686	438.149	0.957688
			18.3656	0.0546094	436.875	0.954903
			18.3697	0.0544459	435.567	0.952044
			18.3738	0.0542784	434.227	0.949116
			18.3779	0.0541069	432.855	0.946118
			18.382	0.0539317	431.453	0.943053
			18.3861	0.0537529	430.023	0.939927
			18.3902	0.0535705	428.564	0.936738
			18.3943	0.0533847	427.077	0.933488
			18.3983	0.0531961	425.568	0.93019
			18.4024	0.0530048	424.038	0.926845
			18.4065	0.0528101	422.481	0.923442
			18.4106	0.0526119	420.895	0.919975
			18.4147	0.0524106	419.285	0.916456
			18.4188	0.0522069	417.655	0.912893
			18.4229	0.0520005	416.004	0.909284
			18.427	0.0517912	414.329	0.905624
			18.4311	0.0515791	412.633	0.901916
			18.4352	0.0513644	410.915	0.898162
			18.4393	0.0511473	409.178	0.894366
			18.4434	0.0509275	407.42	0.890523
			18.4475	0.050705	405.64	0.886631
			18.4516	0.0504798	403.838	0.882693
			18.4557	0.0502523	402.019	0.878716
			18.4598	0.050023	400.184	0.874706
			18.4639	0.0497919	398.335	0.870665
			18.468	0.0495591	396.473	0.866594
			18.4721	0.0493244	394.596	0.862491
			18.4762	0.0490879	392.703	0.858355
			18.4802	0.0488495	390.796	0.854186
			18.4843	0.0486095	388.876	0.849989
			18.4884	0.0483679	386.944	0.845765
			18.4925	0.0481249	384.999	0.841515
			18.4966	0.0478801	383.041	0.837236
			18.5007	0.0476336	381.069	0.832925
			18.5048	0.0473856	379.085	0.828588
			18.5089	0.0471361	377.089	0.824226
			18.513	0.0468851	375.081	0.819836
			18.5171	0.0466326	373.06	0.81542
			18.5212	0.0463786	371.029	0.81098
			18.5253	0.0461234	368.987	0.806517
			18.5294	0.0458672	366.937	0.802037
			18.5335	0.0456099	364.879	0.797539
			18.5376	0.0453516	362.813	0.793021
			18.5417	0.0450923	360.739	0.788488
			18.5458	0.0448325	358.66	0.783944
			18.5499	0.0445717	356.573	0.779383
			18.554	0.0443098	354.478	0.774804
			18.5581	0.0440473	352.378	0.770214
			18.5621	0.0437843	350.274	0.765615
			18.5662	0.0435206	348.165	0.761005
			18.5703	0.0432565	346.052	0.756386
			18.5744	0.0429917	343.933	0.751755
			18.5785	0.0427262	341.81	0.747114
			18.5826	0.0424602	339.681	0.742461
			18.5867	0.0421932	337.546	0.737794
			18.5908	0.0419257	335.406	0.733116
			18.5949	0.0416576	333.261	0.728429
			18.599	0.041389	331.112	0.723732
			18.6031	0.0411202	328.961	0.719031
			18.6072	0.0408512	326.81	0.714328
			18.6113	0.0405822	324.658	0.709623
			18.6154	0.0403129	322.503	0.704914
			18.6195	0.0400433	320.346	0.700199
			18.6236	0.0397738	318.191	0.695488
			18.6277	0.0395048	316.039	0.690784
			18.6318	0.0392361	313.889	0.686086
			18.6359	0.0389675	311.74	0.681389
			18.6399	0.0386989	309.591	0.676692
			18.644	0.0384301	307.441	0.671992
			18.6481	0.0381614	305.291	0.667294
			18.6522	0.0378928	303.143	0.662597
			18.6563	0.0376242	300.994	0.6579
			18.6604	0.0373557	298.846	0.653205
			18.6645	0.0370874	296.699	0.648513
			18.6686	0.0368192	294.553	0.643823
			18.6727	0.0365511	292.409	0.639135
			18.6768	0.0362835	290.268	0.634456
			18.6809	0.0360166	288.133	0.62979
			18.685	0.0357504	286.003	0.625134
			18.6891	0.0354847	283.877	0.620487
			18.6932	0.0352194	281.755	0.615849
			18.6973	0.0349545	279.636	0.611218
			18.7014	0.0346902	277.522	0.606596
			18.7055	0.0344264	275.412	0.601983
			18.7096	0.034163	273.304	0.597377
			18.7137	0.0339001	271.201	0.592779
			18.7178	0.0336377	269.101	0.588191
			18.7218	0.0333757	267.006	0.58361
			18.7259	0.0331144	264.915	0.579041
			18.73	0.0328542	262.833	0.57449
			18.7341	0.0325948	260.759	0.569956
			18.7382	0.0323363	258.69	0.565435
			18.7423	0.0320784	256.627	0.560925
			18.7464	0.0318212	254.57	0.556428
			18.7505	0.0315648	252.518	0.551944
			18.7546	0.0313089	250.471	0.54747
			18.7587	0.0310539	248.431	0.543011
			18.7628	0.0308001	246.401	0.538572
			18.7669	0.0305471	244.377	0.534149
			18.771	0.0302951	242.361	0.529742
			18.7751	0.0300441	240.353	0.525353
			18.7792	0.0297939	238.351	0.520979
			18.7833	0.0295449	236.359	0.516625
			18.7874	0.0292972	234.377	0.512293
			18.7915	0.0290506	232.404	0.50798
			18.7956	0.0288052	230.441	0.503689
			18.7996	0.0285609	228.487	0.499418
			18.8037	0.0283176	226.541	0.495163
			18.8078	0.0280752	224.601	0.490925
			18.8119	0.0278336	222.669	0.486701
			18.816	0.0275932	220.746	0.482497
			18.8201	0.0273541	218.833	0.478316
			18.8242	0.027116	216.928	0.474152
			18.8283	0.0268791	215.033	0.470009
			18.8324	0.0266434	213.147	0.465889
			18.8365	0.026409	211.272	0.46179
			18.8406	0.0261762	209.409	0.457718
			18.8447	0.0259447	207.558	0.453672
			18.8488	0.0257146	205.717	0.449648
			18.8529	0.0254857	203.885	0.445644
			18.857	0.0252577	202.061	0.441657
			18.8611	0.0250306	200.245	0.437688
			18.8652	0.0248046	198.437	0.433736
			18.8693	0.0245798	196.638	0.429804
			18.8734	0.0243563	194.85	0.425896
			18.8775	0.024134	193.072	0.422009
			18.8815	0.0239127	191.302	0.41814
			18.8856	0.0236927	189.542	0.414293
			18.8897	0.0234743	187.794	0.410473
			18.8938	0.0232573	186.058	0.406679
			18.8979	0.0230416	184.333	0.402907
			18.902	0.0228272	182.618	0.399159
			18.9061	0.0226141	180.913	0.395432
			18.9102	0.0224021	179.217	0.391725
			18.9143	0.0221912	177.53	0.388037
			18.9184	0.0219818	175.854	0.384376
			18.9225	0.0217744	174.195	0.380748
			18.9266	0.0215684	172.547	0.377146
			18.9307	0.0213634	170.907	0.373562
			18.9348	0.0211598	169.279	0.370002
			18.9389	0.0209576	167.661	0.366467
			18.943	0.0207568	166.054	0.362954
			18.9471	0.0205572	164.458	0.359465
			18.9512	0.0203589	162.872	0.355998
			18.9553	0.0201621	161.297	0.352556
			18.9593	0.0199667	159.734	0.349139
			18.9634	0.0197726	158.181	0.345745
			18.9675	0.0195797	156.638	0.342373
			18.9716	0.0193885	155.108	0.339029
			18.9757	0.0191988	153.591	0.335712
			18.9798	0.0190104	152.084	0.332418
			18.9839	0.0188236	150.588	0.32915
			18.988	0.0186382	149.106	0.32591
			18.9921	0.0184544	147.635	0.322695
			18.9962	0.0182719	146.175	0.319504
			19.0003	0.0180907	144.725	0.316334
			19.0044	0.0179106	143.285	0.313187
			19.0085	0.0177317	141.854	0.310058
			19.0126	0.0175539	140.431	0.306949
			19.0167	0.0173773	139.019	0.303861
			19.0208	0.0172019	137.615	0.300794
			19.0249	0.0170277	136.221	0.297747
			19.029	0.0168548	134.838	0.294724
			19.0331	0.0166835	133.468	0.29173
			19.0372	0.0165139	132.111	0.288763
			19.0412	0.0163453	130.763	0.285816
			19.0453	0.0161781	129.425	0.282891
			19.0494	0.0160124	128.099	0.279994
			19.0535	0.0158482	126.785	0.277122
			19.0576	0.0156852	125.482	0.274273
			19.0617	0.0155237	124.19	0.271448
			19.0658	0.0153634	122.907	0.268646
			19.0699	0.0152042	121.634	0.265862
			19.074	0.015046	120.368	0.263095
			19.0781	0.014889	119.112	0.260351
			19.0822	0.0147336	117.869	0.257633
			19.0863	0.0145795	116.636	0.254938
			19.0904	0.0144265	115.412	0.252262
			19.0945	0.0142747	114.197	0.249608
			19.0986	0.014124	112.992	0.246974
			19.1027	0.0139745	111.796	0.244358
			19.1068	0.013826	110.608	0.241763
			19.1109	0.0136787	109.43	0.239187
			19.115	0.0135326	108.26	0.236631
			19.1191	0.0133878	107.102	0.2341
			19.1231	0.0132444	105.955	0.231592
			19.1272	0.0131023	104.818	0.229107
			19.1313	0.0129614	103.692	0.226645
			19.1354	0.0128218	102.574	0.224203
			19.1395	0.0126833	101.466	0.221781
			19.1436	0.0125458	100.367	0.219378
			19.1477	0.0124097	99.2772	0.216996
			19.1518	0.0122749	98.199	0.214639
			19.1559	0.0121412	97.1292	0.212301
			19.16	0.0120085	96.0678	0.209981
			19.1641	0.0118771	95.0164	0.207683
			19.1682	0.011747	93.9758	0.205408
			19.1723	0.011618	92.9442	0.203154
			19.1764	0.0114899	91.9192	0.200913
[truncated: 445 more rows]

## Sheet: Figure 4E
hL1ORF1p-DNTR			volume	OD280	OD280	OD280		volume	MW
			(ml)	relative		normalized		(ml)	kDa
Injection volume	100 µl
Superdex 200			11.003	0.00130761	10.4609	0.0211035		13.8039	103.267
			11.0071	0.00130749	10.4599	0.0211016		13.808	103.326
			11.0112	0.00130741	10.4593	0.0211003		13.8121	103.398
			11.0153	0.00130736	10.4589	0.0210995		13.8162	103.453
			11.0194	0.0013073	10.4584	0.0210985		13.8203	103.502
			11.0234	0.00130723	10.4578	0.0210973		13.8244	103.549
			11.0275	0.00130713	10.4571	0.0210958		13.8285	103.603
			11.0316	0.00130703	10.4562	0.0210941		13.8325	103.647
			11.0357	0.00130689	10.4551	0.0210918		13.8366	103.691
			11.0398	0.00130674	10.4539	0.0210895		13.8407	103.741
			11.0439	0.00130663	10.4531	0.0210877		13.8448	103.804
			11.048	0.00130653	10.4522	0.0210861		13.8489	103.871
			11.0521	0.00130642	10.4514	0.0210844		13.853	103.933
			11.0562	0.00130631	10.4504	0.0210825		13.8571	103.992
			11.0603	0.00130616	10.4493	0.0210801		13.8612	104.044
			11.0644	0.00130599	10.448	0.0210774		13.8653	104.103
			11.0685	0.00130583	10.4466	0.0210747		13.8694	104.168
			11.0726	0.00130564	10.4451	0.0210717		13.8735	104.224
			11.0767	0.00130545	10.4436	0.0210687		13.8776	104.288
			11.0808	0.00130534	10.4427	0.0210669		13.8817	104.349
			11.0849	0.00130525	10.442	0.0210655		13.8858	104.416
			11.089	0.00130518	10.4414	0.0210642		13.8899	104.487
			11.0931	0.00130511	10.4409	0.0210631		13.894	104.544
			11.0972	0.00130504	10.4403	0.0210621		13.8981	104.592
			11.1013	0.00130497	10.4398	0.021061		13.9022	104.632
			11.1053	0.0013049	10.4392	0.0210598		13.9063	104.672
			11.1094	0.00130483	10.4386	0.0210586		13.9103	104.721
			11.1135	0.00130478	10.4383	0.0210579		13.9144	104.781
			11.1176	0.00130474	10.438	0.0210573		13.9185	104.851
			11.1217	0.0013047	10.4376	0.0210566		13.9226	104.928
			11.1258	0.00130465	10.4372	0.0210557		13.9267	105.007
			11.1299	0.00130456	10.4365	0.0210543		13.9308	105.08
			11.134	0.00130444	10.4356	0.0210524		13.9349	105.146
			11.1381	0.00130431	10.4345	0.0210503		13.939	105.217
			11.1422	0.00130417	10.4334	0.021048		13.9431	105.28
			11.1463	0.00130406	10.4325	0.0210462		13.9472	105.341
			11.1504	0.00130397	10.4317	0.0210447		13.9513	105.392
			11.1545	0.00130389	10.4311	0.0210434		13.9554	105.444
			11.1586	0.0013038	10.4304	0.021042		13.9595	105.488
			11.1627	0.0013037	10.4296	0.0210404		13.9636	105.523
			11.1668	0.00130358	10.4287	0.0210385		13.9677	105.551
			11.1709	0.00130347	10.4278	0.0210368		13.9718	105.576
			11.175	0.00130336	10.4269	0.0210349		13.9759	105.604
			11.1791	0.00130324	10.4259	0.021033		13.98	105.64
			11.1831	0.00130312	10.4249	0.021031		13.9841	105.689
			11.1872	0.001303	10.424	0.0210291		13.9882	105.754
			11.1913	0.00130288	10.4231	0.0210273		13.9922	105.832
			11.1954	0.00130276	10.4221	0.0210253		13.9963	105.912
			11.1995	0.00130264	10.4211	0.0210233		14.0004	105.978
			11.2036	0.00130254	10.4203	0.0210216		14.0045	106.035
			11.2077	0.00130243	10.4194	0.0210198		14.0086	106.096
			11.2118	0.00130229	10.4183	0.0210176		14.0127	106.155
			11.2159	0.00130217	10.4173	0.0210157		14.0168	106.216
			11.22	0.00130209	10.4167	0.0210144		14.0209	106.274
			11.2241	0.00130202	10.4161	0.0210133		14.025	106.324
			11.2282	0.00130194	10.4155	0.021012		14.0291	106.373
			11.2323	0.00130186	10.4149	0.0210107		14.0332	106.416
			11.2364	0.00130174	10.4139	0.0210088		14.0373	106.447
			11.2405	0.00130156	10.4125	0.0210059		14.0414	106.467
			11.2446	0.00130138	10.411	0.021003		14.0455	106.487
			11.2487	0.00130121	10.4097	0.0210003		14.0496	106.523
			11.2528	0.00130107	10.4086	0.020998		14.0537	106.572
			11.2569	0.00130097	10.4077	0.0209963		14.0578	106.625
			11.261	0.00130087	10.407	0.0209948		14.0619	106.702
			11.265	0.00130077	10.4062	0.0209931		14.066	106.787
			11.2691	0.00130066	10.4053	0.0209914		14.07	106.858
			11.2732	0.00130056	10.4045	0.0209897		14.0741	106.926
			11.2773	0.00130045	10.4036	0.020988		14.0782	106.991
			11.2814	0.00130034	10.4027	0.0209862		14.0823	107.043
			11.2855	0.00130023	10.4019	0.0209845		14.0864	107.096
			11.2896	0.00130015	10.4012	0.0209831		14.0905	107.144
			11.2937	0.00130007	10.4005	0.0209818
			11.2978	0.0013	10.4	0.0209807
			11.3019	0.00129995	10.3996	0.0209799
			11.306	0.00129991	10.3993	0.0209793
			11.3101	0.00129987	10.399	0.0209786
			11.3142	0.00129982	10.3985	0.0209777
			11.3183	0.00129975	10.398	0.0209766
			11.3224	0.00129964	10.3972	0.020975
			11.3265	0.00129953	10.3963	0.0209731
			11.3306	0.0012994	10.3952	0.0209711
			11.3347	0.00129927	10.3942	0.0209689
			11.3388	0.00129917	10.3933	0.0209672
			11.3429	0.00129909	10.3927	0.020966
			11.3469	0.001299	10.392	0.0209645
			11.351	0.00129888	10.391	0.0209626
			11.3551	0.00129875	10.39	0.0209605
			11.3592	0.00129862	10.389	0.0209585
			11.3633	0.0012985	10.388	0.0209565
			11.3674	0.00129839	10.3871	0.0209547
			11.3715	0.00129828	10.3863	0.020953
			11.3756	0.00129819	10.3855	0.0209514
			11.3797	0.00129809	10.3847	0.0209498
			11.3838	0.00129798	10.3838	0.0209481
			11.3879	0.00129786	10.3829	0.0209461
			11.392	0.00129773	10.3818	0.0209441
			11.3961	0.00129761	10.3809	0.0209422
			11.4002	0.0012975	10.38	0.0209403
			11.4043	0.00129738	10.379	0.0209384
			11.4084	0.00129726	10.3781	0.0209365
			11.4125	0.00129716	10.3773	0.0209348
			11.4166	0.00129705	10.3764	0.0209331
			11.4207	0.00129694	10.3755	0.0209312
			11.4247	0.00129682	10.3745	0.0209293
			11.4288	0.00129671	10.3737	0.0209276
			11.4329	0.00129661	10.3729	0.020926
			11.437	0.00129652	10.3721	0.0209245
			11.4411	0.0012964	10.3712	0.0209227
			11.4452	0.00129629	10.3703	0.0209208
			11.4493	0.00129619	10.3695	0.0209192
			11.4534	0.0012961	10.3688	0.0209177
			11.4575	0.00129601	10.368	0.0209162
			11.4616	0.00129594	10.3675	0.0209152
			11.4657	0.00129591	10.3673	0.0209147
			11.4698	0.00129588	10.367	0.0209142
			11.4739	0.00129584	10.3667	0.0209135
			11.478	0.00129579	10.3663	0.0209128
			11.4821	0.00129572	10.3658	0.0209117
			11.4862	0.00129563	10.365	0.0209101
			11.4903	0.00129549	10.3639	0.0209079
			11.4944	0.00129534	10.3627	0.0209055
			11.4985	0.00129522	10.3618	0.0209036
			11.5026	0.00129513	10.361	0.020902
			11.5066	0.00129502	10.3602	0.0209004
			11.5107	0.0012949	10.3592	0.0208984
			11.5148	0.00129478	10.3582	0.0208964
			11.5189	0.00129465	10.3572	0.0208944
			11.523	0.00129453	10.3562	0.0208924
			11.5271	0.00129441	10.3553	0.0208905
			11.5312	0.0012943	10.3544	0.0208888
			11.5353	0.00129419	10.3535	0.0208869
			11.5394	0.00129404	10.3523	0.0208845
			11.5435	0.0012939	10.3512	0.0208822
			11.5476	0.0012938	10.3504	0.0208806
			11.5517	0.00129372	10.3497	0.0208793
			11.5558	0.00129367	10.3494	0.0208786
			11.5599	0.00129364	10.3491	0.020878
			11.564	0.0012936	10.3488	0.0208774
			11.5681	0.00129356	10.3485	0.0208767
			11.5722	0.00129351	10.3481	0.020876
			11.5763	0.00129346	10.3477	0.0208752
			11.5804	0.0012934	10.3472	0.0208741
			11.5844	0.00129331	10.3464	0.0208727
			11.5885	0.00129318	10.3455	0.0208706
			11.5926	0.00129302	10.3442	0.020868
			11.5967	0.00129283	10.3426	0.020865
			11.6008	0.00129269	10.3415	0.0208626
			11.6049	0.00129263	10.3411	0.0208618
			11.609	0.00129261	10.3409	0.0208615
			11.6131	0.00129259	10.3407	0.0208611
			11.6172	0.00129255	10.3404	0.0208605
			11.6213	0.0012925	10.34	0.0208597
			11.6254	0.00129244	10.3395	0.0208586
			11.6295	0.00129234	10.3387	0.0208571
			11.6336	0.00129221	10.3377	0.0208549
			11.6377	0.00129208	10.3366	0.0208528
			11.6418	0.001292	10.336	0.0208516
			11.6459	0.00129196	10.3357	0.020851
			11.65	0.00129195	10.3356	0.0208508
			11.6541	0.00129194	10.3355	0.0208506
			11.6582	0.00129192	10.3354	0.0208503
			11.6623	0.00129189	10.3351	0.0208498
			11.6663	0.00129185	10.3348	0.0208491
			11.6704	0.0012918	10.3344	0.0208483
			11.6745	0.00129176	10.3341	0.0208477
			11.6786	0.00129172	10.3338	0.0208471
			11.6827	0.00129168	10.3334	0.0208464
			11.6868	0.00129164	10.3331	0.0208457
			11.6909	0.0012916	10.3328	0.0208452
			11.695	0.00129157	10.3325	0.0208446
			11.6991	0.00129151	10.3321	0.0208437
			11.7032	0.00129143	10.3314	0.0208424
			11.7073	0.00129133	10.3306	0.0208408
			11.7114	0.00129124	10.3299	0.0208393
			11.7155	0.00129115	10.3292	0.0208379
			11.7196	0.00129107	10.3286	0.0208366
			11.7237	0.00129101	10.3281	0.0208356
			11.7278	0.00129096	10.3276	0.0208347
			11.7319	0.0012909	10.3272	0.0208338
			11.736	0.00129083	10.3266	0.0208326
			11.7401	0.00129073	10.3258	0.020831
			11.7442	0.00129061	10.3249	0.0208291
			11.7482	0.00129049	10.3239	0.0208272
			11.7523	0.00129037	10.323	0.0208253
			11.7564	0.00129026	10.3221	0.0208235
			11.7605	0.00129016	10.3213	0.0208219
			11.7646	0.00129005	10.3204	0.0208202
			11.7687	0.00128994	10.3195	0.0208184
			11.7728	0.00128982	10.3185	0.0208164
			11.7769	0.0012897	10.3176	0.0208145
			11.781	0.00128963	10.317	0.0208133
			11.7851	0.00128969	10.3175	0.0208142
			11.7892	0.00129061	10.3249	0.0208292
			11.7933	0.00129309	10.3447	0.0208691
			11.7974	0.00129624	10.3699	0.02092
			11.8015	0.00129922	10.3937	0.020968
			11.8056	0.00130202	10.4162	0.0210133
			11.8097	0.00130467	10.4373	0.021056
			11.8138	0.00130718	10.4574	0.0210965
			11.8179	0.00130958	10.4766	0.0211353
			11.822	0.00131184	10.4947	0.0211718
			11.826	0.00131395	10.5116	0.0212059
			11.8301	0.00131592	10.5274	0.0212376
			11.8342	0.00131775	10.542	0.0212672
			11.8383	0.00131946	10.5557	0.0212948
			11.8424	0.00132106	10.5684	0.0213205
			11.8465	0.00132255	10.5804	0.0213446
			11.8506	0.00132398	10.5918	0.0213677
			11.8547	0.00132532	10.6026	0.0213894
			11.8588	0.00132658	10.6127	0.0214097
			11.8629	0.00132775	10.622	0.0214286
			11.867	0.00132885	10.6308	0.0214463
			11.8711	0.0013299	10.6392	0.0214632
			11.8752	0.00133088	10.647	0.0214791
			11.8793	0.0013318	10.6544	0.0214938
			11.8834	0.00133265	10.6612	0.0215076
			11.8875	0.00133344	10.6675	0.0215204
			11.8916	0.00133418	10.6734	0.0215323
			11.8957	0.00133485	10.6788	0.0215432
			11.8998	0.00133546	10.6837	0.0215529
			11.9039	0.001336	10.688	0.0215618
			11.9079	0.00133652	10.6922	0.0215701
			11.912	0.00133701	10.6961	0.021578
			11.9161	0.00133748	10.6998	0.0215855
			11.9202	0.00133794	10.7035	0.021593
			11.9243	0.0013384	10.7072	0.0216004
			11.9284	0.00133916	10.7133	0.0216127
			11.9325	0.00134104	10.7284	0.0216431
			11.9366	0.00134404	10.7523	0.0216914
			11.9407	0.00134723	10.7779	0.021743
			11.9448	0.00135047	10.8038	0.0217953
			11.9489	0.00135368	10.8295	0.0218471
			11.953	0.00135673	10.8539	0.0218963
			11.9571	0.00135962	10.8769	0.0219429
			11.9612	0.00136233	10.8987	0.0219867
			11.9653	0.00136489	10.9191	0.0220279
			11.9694	0.00136729	10.9383	0.0220667
			11.9735	0.00136955	10.9564	0.0221032
			11.9776	0.00137166	10.9733	0.0221373
			11.9817	0.00137364	10.9891	0.0221691
			11.9857	0.0013756	11.0048	0.0222008
			11.9898	0.00137835	11.0268	0.0222451
			11.9939	0.00138228	11.0582	0.0223086
			11.998	0.00138653	11.0922	0.0223771
			12.0021	0.00139078	11.1263	0.0224459
			12.0062	0.00139496	11.1597	0.0225133
			12.0103	0.00139901	11.192	0.0225786
			12.0144	0.00140285	11.2228	0.0226405
			12.0185	0.00140647	11.2518	0.0226991
			12.0226	0.00140992	11.2793	0.0227546
			12.0267	0.0014132	11.3056	0.0228076
			12.0308	0.00141658	11.3326	0.0228622
			12.0349	0.00142091	11.3673	0.0229321
			12.039	0.00142647	11.4118	0.0230218
			12.0431	0.00143232	11.4586	0.0231163
			12.0472	0.00143785	11.5028	0.0232055
			12.0513	0.00144308	11.5446	0.0232898
			12.0554	0.00144801	11.5841	0.0233694
			12.0595	0.00145267	11.6214	0.0234447
			12.0636	0.00145727	11.6582	0.0235189
			12.0676	0.00146257	11.7005	0.0236043
			12.0717	0.00146884	11.7507	0.0237055
			12.0758	0.00147524	11.8019	0.0238089
			12.0799	0.00148151	11.8521	0.0239102
			12.084	0.00148757	11.9006	0.0240079
			12.0881	0.00149338	11.947	0.0241016
			12.0922	0.00149895	11.9916	0.0241916
			12.0963	0.00150506	12.0405	0.0242902
			12.1004	0.00151218	12.0975	0.0244051
			12.1045	0.00151967	12.1574	0.024526
			12.1086	0.00152719	12.2175	0.0246473
			12.1127	0.00153429	12.2743	0.0247618
			12.1168	0.001541	12.328	0.0248701
			12.1209	0.00154797	12.3837	0.0249826
			12.125	0.00155619	12.4495	0.0251153
			12.1291	0.00156502	12.5202	0.0252579
			12.1332	0.0015734	12.5872	0.025393
			12.1373	0.00158131	12.6504	0.0255207
			12.1414	0.00158893	12.7114	0.0256437
			12.1454	0.00159706	12.7765	0.025775
			12.1495	0.00160605	12.8484	0.02592
			12.1536	0.00161508	12.9206	0.0260657
			12.1577	0.00162394	12.9915	0.0262088
			12.1618	0.00163254	13.0603	0.0263476
			12.1659	0.00164144	13.1315	0.0264912
			12.17	0.00165159	13.2127	0.026655
			12.1741	0.00166216	13.2973	0.0268257
			12.1782	0.00167214	13.3771	0.0269867
			12.1823	0.00168156	13.4525	0.0271387
			12.1864	0.00169103	13.5282	0.0272915
			12.1905	0.00170151	13.6121	0.0274606
			12.1946	0.00171255	13.7004	0.0276389
			12.1987	0.00172317	13.7854	0.0278103
			12.2028	0.00173331	13.8665	0.0279739
			12.2069	0.0017437	13.9496	0.0281415
			12.211	0.00175484	14.0387	0.0283213
			12.2151	0.00176596	14.1277	0.0285009
			12.2192	0.00177685	14.2148	0.0286765
			12.2233	0.00178749	14.2999	0.0288482
			12.2273	0.00179847	14.3877	0.0290254
			12.2314	0.00181048	14.4838	0.0292193
			12.2355	0.00182269	14.5815	0.0294163
			12.2396	0.00183422	14.6738	0.0296025
			12.2437	0.00184546	14.7636	0.0297838
			12.2478	0.00185727	14.8581	0.0299744
			12.2519	0.00186964	14.9571	0.0301741
			12.256	0.00188165	15.0532	0.030368
			12.2601	0.00189317	15.1453	0.0305538
			12.2642	0.00190456	15.2365	0.0307377
			12.2683	0.00191667	15.3334	0.0309332
			12.2724	0.00192933	15.4347	0.0311375
			12.2765	0.00194161	15.5329	0.0313357
			12.2806	0.00195343	15.6275	0.0315265
			12.2847	0.00196538	15.723	0.0317192
			12.2888	0.00197806	15.8245	0.0319239
			12.2929	0.00199068	15.9255	0.0321276
			12.297	0.002003	16.024	0.0323264
			12.3011	0.00201511	16.1209	0.0325219
			12.3052	0.00202765	16.2212	0.0327242
			12.3092	0.0020408	16.3264	0.0329365
			12.3133	0.00205367	16.4294	0.0331442
			12.3174	0.00206608	16.5287	0.0333445
			12.3215	0.00207839	16.6271	0.0335431
			12.3256	0.00209136	16.7309	0.0337525
			12.3297	0.00210479	16.8384	0.0339693
			12.3338	0.00211779	16.9423	0.034179
			12.3379	0.00213024	17.0419	0.03438
			12.342	0.00214226	17.1381	0.034574
			12.3461	0.0021547	17.2376	0.0347747
			12.3502	0.00216768	17.3414	0.0349842
			12.3543	0.00218046	17.4437	0.0351904
			12.3584	0.00219283	17.5427	0.0353901
			12.3625	0.00220466	17.6373	0.0355809
			12.3666	0.00221671	17.7337	0.0357754
			12.3707	0.00222969	17.8375	0.0359849
			12.3748	0.0022428	17.9424	0.0361966
			12.3789	0.00225521	18.0417	0.0363969
			12.383	0.00226725	18.138	0.0365911
			12.387	0.00227977	18.2382	0.0367932
			12.3911	0.00229302	18.3441	0.037007
			12.3952	0.00230611	18.4488	0.0372182
			12.3993	0.00231848	18.5478	0.0374179
			12.4034	0.0023302	18.6416	0.0376071
			12.4075	0.00234203	18.7362	0.037798
			12.4116	0.00235487	18.839	0.0380053
			12.4157	0.00236797	18.9437	0.0382166
			12.4198	0.00238033	19.0426	0.0384161
			12.4239	0.00239199	19.1359	0.0386043
			12.428	0.00240338	19.2271	0.0387882
			12.4321	0.00241544	19.3235	0.0389828
			12.4362	0.00242822	19.4257	0.039189
			12.4403	0.00244074	19.5259	0.039391
			12.4444	0.00245258	19.6206	0.0395821
			12.4485	0.00246379	19.7103	0.0397631
			12.4526	0.00247487	19.799	0.0399419
			12.4567	0.00248675	19.894	0.0401336
			12.4608	0.00249907	19.9925	0.0403324
			12.4649	0.00251087	20.087	0.040523
			12.4689	0.00252209	20.1767	0.0407041
			12.473	0.00253272	20.2617	0.0408755
			12.4771	0.00254278	20.3423	0.041038
			12.4812	0.00255296	20.4237	0.0412022
			12.4853	0.00256421	20.5137	0.0413837
			12.4894	0.00257589	20.6071	0.0415723
			12.4935	0.00258697	20.6958	0.0417511
			12.4976	0.00259746	20.7797	0.0419205
			12.5017	0.00260739	20.8591	0.0420806
			12.5058	0.00261676	20.9341	0.0422319
			12.5099	0.0026261	21.0088	0.0423827
			12.514	0.00263637	21.091	0.0425484
			12.5181	0.00264733	21.1787	0.0427253
			12.5222	0.00265799	21.2639	0.0428973
			12.5263	0.00266804	21.3443	0.0430595
			12.5304	0.00267752	21.4202	0.0432125
			12.5345	0.00268647	21.4918	0.043357
			12.5386	0.00269497	21.5597	0.0434941
			12.5427	0.00270372	21.6298	0.0436354
			12.5467	0.00271366	21.7093	0.0437958
			12.5508	0.00272402	21.7921	0.0439629
			12.5549	0.0027338	21.8704	0.0441207
			12.559	0.00274301	21.9441	0.0442694
			12.5631	0.00275168	22.0135	0.0444094
			12.5672	0.00275985	22.0788	0.0445412
			12.5713	0.00276756	22.1405	0.0446657
			12.5754	0.00277549	22.2039	0.0447937
			12.5795	0.00278465	22.2772	0.0449414
			12.5836	0.00279436	22.3549	0.0450981
			12.5877	0.00280357	22.4286	0.0452468
			12.5918	0.00281228	22.4982	0.0453873
			12.5959	0.0028205	22.564	0.04552
			12.6	0.00282826	22.6261	0.0456454
			12.6041	0.00283568	22.6855	0.0457651
			12.6082	0.00284353	22.7482	0.0458916
			12.6123	0.00285228	22.8183	0.046033
			12.6164	0.0028613	22.8904	0.0461786
			12.6205	0.00287028	22.9622	0.0463234
			12.6246	0.00287876	23.0301	0.0464603
			12.6286	0.00288676	23.0941	0.0465894
			12.6327	0.00289429	23.1543	0.0467109
			12.6368	0.00290138	23.2111	0.0468254
			12.6409	0.00290879	23.2704	0.046945
			12.645	0.00291754	23.3403	0.0470861
			12.6491	0.00292681	23.4145	0.0472359
			12.6532	0.0029356	23.4848	0.0473777
			12.6573	0.00294393	23.5515	0.0475121
			12.6614	0.00295179	23.6143	0.0476389
			12.6655	0.00295919	23.6735	0.0477584
			12.6696	0.00296686	23.7348	0.0478821
			12.6737	0.00297543	23.8035	0.0480205
			12.6778	0.00298422	23.8738	0.0481624
			12.6819	0.00299285	23.9428	0.0483015
			12.686	0.00300117	24.0094	0.0484359
			12.6901	0.00300916	24.0733	0.0485648
			12.6942	0.00301718	24.1374	0.0486943
			12.6983	0.00302611	24.2089	0.0488383
			12.7024	0.00303568	24.2855	0.0489929
			12.7064	0.00304502	24.3602	0.0491436
			12.7105	0.00305404	24.4323	0.0492891
			12.7146	0.0030626	24.5008	0.0494273
			12.7187	0.00307126	24.57	0.049567
			12.7228	0.00308094	24.6475	0.0497233
			12.7269	0.00309122	24.7298	0.0498892
			12.731	0.00310111	24.8089	0.0500488
			12.7351	0.00311056	24.8845	0.0502013
			12.7392	0.0031201	24.9608	0.0503553
			12.7433	0.00313071	25.0457	0.0505265
			12.7474	0.00314178	25.1342	0.0507051
			12.7515	0.0031523	25.2184	0.050875
			12.7556	0.00316271	25.3017	0.051043
			12.7597	0.00317393	25.3915	0.0512241
			12.7638	0.00318575	25.486	0.0514147
			12.7679	0.00319718	25.5774	0.0515992
			12.772	0.00320866	25.6693	0.0517845
			12.7761	0.00322097	25.7677	0.0519832
			12.7802	0.00323379	25.8703	0.0521902
			12.7843	0.00324648	25.9719	0.052395
			12.7883	0.00325966	26.0773	0.0526077
			12.7924	0.00327351	26.1881	0.0528312
			12.7965	0.00328739	26.2991	0.0530552
			12.8006	0.00330158	26.4126	0.0532842
			12.8047	0.00331642	26.5313	0.0535236
			12.8088	0.00333139	26.6511	0.0537653
			12.8129	0.00334672	26.7738	0.0540127
			12.817	0.00336262	26.9009	0.0542693
			12.8211	0.00337877	27.0302	0.05453
			12.8252	0.0033956	27.1648	0.0548015
			12.8293	0.00341282	27.3026	0.0550795
			12.8334	0.00343021	27.4417	0.0553601
			12.8375	0.00344814	27.5851	0.0556495
			12.8416	0.00346649	27.7319	0.0559456
			12.8457	0.0034855	27.884	0.0562525
			12.8498	0.00350508	28.0406	0.0565684
			12.8539	0.00352516	28.2013	0.0568926
			12.858	0.00354579	28.3664	0.0572256
			12.8621	0.00356692	28.5354	0.0575665
			12.8662	0.00358868	28.7095	0.0579177
			12.8702	0.00361107	28.8885	0.058279
			12.8743	0.00363411	29.0729	0.0586509
			12.8784	0.00365794	29.2635	0.0590354
			12.8825	0.00368236	29.4589	0.0594296
			12.8866	0.00370745	29.6596	0.0598346
			12.8907	0.00373329	29.8663	0.0602516
			12.8948	0.00375965	30.0772	0.0606769
			12.8989	0.00378686	30.2949	0.0611162
			12.903	0.00381471	30.5177	0.0615655
			12.9071	0.00384304	30.7443	0.0620227
			12.9112	0.00387203	30.9763	0.0624908
			12.9153	0.00390158	31.2127	0.0629676
			12.9194	0.00393201	31.4561	0.0634587
			12.9235	0.00396356	31.7085	0.0639679
			12.9276	0.00399577	31.9662	0.0644878
			12.9317	0.00402852	32.2281	0.0650162
			12.9358	0.00406221	32.4976	0.0655599
			12.9399	0.00409694	32.7755	0.0661205
			12.944	0.00413253	33.0602	0.0666949
			12.948	0.00416902	33.3521	0.0672838
			12.9521	0.00420648	33.6519	0.0678884
			12.9562	0.00424482	33.9586	0.0685072
			12.9603	0.00428399	34.2719	0.0691394
			12.9644	0.00432404	34.5924	0.0697857
			12.9685	0.00436513	34.921	0.0704488
			12.9726	0.00440706	35.2565	0.0711256
			12.9767	0.0044497	35.5976	0.0718137
			12.9808	0.0044934	35.9472	0.072519
			12.9849	0.0045383	36.3064	0.0732435
			12.989	0.00458427	36.6741	0.0739855
			12.9931	0.00463128	37.0503	0.0747443
			12.9972	0.00467925	37.434	0.0755184
			13.0013	0.00472818	37.8254	0.076308
			13.0054	0.0047783	38.2264	0.0771169
			13.0095	0.0048298	38.6384	0.0779482
			13.0136	0.00488255	39.0604	0.0787995
			13.0177	0.00493626	39.4901	0.0796663
			13.0218	0.00499093	39.9274	0.0805486
			13.0259	0.00504673	40.3739	0.0814492
			13.0299	0.00510386	40.8309	0.0823712
			13.034	0.00516234	41.2987	0.083315
			13.0381	0.005222	41.776	0.0842779
			13.0422	0.00528307	42.2646	0.0852634
			13.0463	0.00534566	42.7653	0.0862736
			13.0504	0.00540944	43.2755	0.0873029
			13.0545	0.00547443	43.7955	0.0883519
			13.0586	0.00554086	44.3269	0.0894239
			13.0627	0.00560855	44.8684	0.0905163
			13.0668	0.00567738	45.419	0.0916272
			13.0709	0.00574746	45.9797	0.0927582
			13.075	0.00581899	46.5519	0.0939126
			13.0791	0.00589188	47.1351	0.0950891
			13.0832	0.00596631	47.7305	0.0962903
			13.0873	0.00604249	48.3399	0.0975197
			13.0914	0.00612025	48.962	0.0987747
			13.0955	0.0061996	49.5968	0.100055
			13.0996	0.00628038	50.2431	0.101359
			13.1037	0.00636244	50.8995	0.102683
			13.1077	0.00644595	51.5676	0.104031
			13.1118	0.00653102	52.2482	0.105404
			13.1159	0.00661775	52.942	0.106804
			13.12	0.00670614	53.6491	0.10823
			13.1241	0.00679607	54.3685	0.109682
			13.1282	0.00688752	55.1002	0.111158
			13.1323	0.00698071	55.8457	0.112662
			13.1364	0.00707574	56.6059	0.114195
			13.1405	0.00717258	57.3806	0.115758
			13.1446	0.00727132	58.1705	0.117352
			13.1487	0.0073722	58.9776	0.11898
			13.1528	0.0074755	59.804	0.120647
			13.1569	0.00758104	60.6483	0.12235
			13.161	0.00768853	61.5082	0.124085
			13.1651	0.00779783	62.3826	0.125849
			13.1692	0.00790917	63.2734	0.127646
			13.1733	0.00802281	64.1825	0.12948
			13.1774	0.00813838	65.107	0.131345
			13.1815	0.00825585	66.0468	0.133241
			13.1856	0.00837568	67.0054	0.135175
			13.1896	0.00849808	67.9847	0.137151
			13.1937	0.0086229	68.9832	0.139165
			13.1978	0.00874989	69.9991	0.141214
			13.2019	0.00887923	71.0339	0.143302
			13.206	0.00901115	72.0892	0.145431
			13.2101	0.00914567	73.1654	0.147602
			13.2142	0.00928273	74.2619	0.149814
			13.2183	0.00942243	75.3794	0.152069
			13.2224	0.00956501	76.5201	0.15437
			13.2265	0.0097105	77.684	0.156718
			13.2306	0.00985873	78.8699	0.15911
			13.2347	0.0100098	80.078	0.161547
			13.2388	0.0101639	81.3113	0.164035
			13.2429	0.010321	82.568	0.166571
			13.247	0.0104806	83.845	0.169147
			13.2511	0.0106429	85.1435	0.171766
			13.2552	0.0108081	86.4647	0.174432
			13.2593	0.0109762	87.8093	0.177144
			13.2634	0.0111473	89.1782	0.179906
			13.2674	0.0113215	90.572	0.182718
			13.2715	0.011499	91.9917	0.185582
			13.2756	0.0116796	93.4372	0.188498
			13.2797	0.0118636	94.9085	0.191466
			13.2838	0.0120509	96.4069	0.194489
			13.2879	0.0122415	97.9318	0.197565
			13.292	0.0124355	99.4844	0.200697
			13.2961	0.0126333	101.066	0.203889
			13.3002	0.0128345	102.676	0.207136
			13.3043	0.0130392	104.313	0.210439
			13.3084	0.0132473	105.978	0.213798
			13.3125	0.0134589	107.671	0.217214
			13.3166	0.0136743	109.394	0.220689
			13.3207	0.0138932	111.146	0.224222
			13.3248	0.0141158	112.927	0.227815
			13.3289	0.0143423	114.738	0.23147
			13.333	0.0145725	116.58	0.235186
			13.3371	0.0148066	118.453	0.238964
			13.3412	0.0150425	120.34	0.24277
			13.3453	0.0152791	122.233	0.24659
			13.3493	0.0155219	124.175	0.250508
			13.3534	0.0157719	126.175	0.254543
			13.3575	0.0160264	128.211	0.258649
			13.3616	0.0162849	130.279	0.262822
			13.3657	0.0165473	132.378	0.267057
			13.3698	0.0168141	134.513	0.271363
			13.3739	0.0170856	136.685	0.275744
			13.378	0.0173611	138.889	0.280191
			13.3821	0.0176407	141.126	0.284703
			13.3862	0.0179245	143.396	0.289283
			13.3903	0.0182123	145.698	0.293928
			13.3944	0.0185041	148.033	0.298637
			13.3985	0.0188005	150.404	0.303422
			13.4026	0.0191013	152.81	0.308275
			13.4067	0.0194051	155.241	0.313179
			13.4108	0.0197125	157.7	0.31814
			13.4149	0.0200242	160.193	0.32317
			13.419	0.0203401	162.721	0.328269
			13.4231	0.0206607	165.285	0.333442
			13.4272	0.0209863	167.891	0.338698
			13.4312	0.0213163	170.531	0.344024
			13.4353	0.02165	173.2	0.34941
			13.4394	0.0219882	175.905	0.354867
			13.4435	0.0223308	178.647	0.360397
			13.4476	0.0226778	181.423	0.365998
			13.4517	0.023029	184.232	0.371665
			13.4558	0.0233839	187.071	0.377393
			13.4599	0.0237423	189.939	0.383177
			13.464	0.0241044	192.835	0.389021
			13.4681	0.02447	195.76	0.394921
			13.4722	0.0248393	198.714	0.400881
			13.4763	0.0252129	201.703	0.406911
			13.4804	0.0255906	204.725	0.413007
			13.4845	0.0259716	207.773	0.419156
			13.4886	0.0263558	210.847	0.425357
			13.4927	0.0267434	213.947	0.431612
			13.4968	0.0271347	217.078	0.437927
			13.5009	0.0275298	220.239	0.444304
			13.505	0.0279284	223.427	0.450736
			13.509	0.02833	226.64	0.457217
			13.5131	0.0287347	229.877	0.463749
			13.5172	0.029142	233.136	0.470322
			13.5213	0.0295516	236.413	0.476934
			13.5254	0.0299637	239.71	0.483585
			13.5295	0.0303782	243.026	0.490274
			13.5336	0.0307948	246.359	0.496998
			13.5377	0.0312136	249.709	0.503757
			13.5418	0.0316347	253.078	0.510553
			13.5459	0.0320581	256.465	0.517385
			13.55	0.0324838	259.87	0.524256
			13.5541	0.0329115	263.292	0.531158
			13.5582	0.0333408	266.726	0.538087
			13.5623	0.0337718	270.175	0.545043
			13.5664	0.0342047	273.637	0.552029
			13.5705	0.0346389	277.111	0.559038
			13.5746	0.0350745	280.596	0.566067
			13.5787	0.035511	284.088	0.573112
			13.5828	0.0359485	287.588	0.580172
			13.5869	0.0363867	291.094	0.587245
			13.5909	0.0368253	294.603	0.594324
			13.595	0.0372645	298.116	0.601411
			13.5991	0.0377041	301.633	0.608506
			13.6032	0.0381438	305.15	0.615602
			13.6073	0.0385835	308.668	0.622699
			13.6114	0.0390231	312.185	0.629794
			13.6155	0.039462	315.696	0.636877
			13.6196	0.0398999	319.199	0.643944
			13.6237	0.0403374	322.699	0.651005
			13.6278	0.0407743	326.194	0.658056
			13.6319	0.0412106	329.685	0.665097
			13.636	0.0416461	333.168	0.672126
			13.6401	0.04208	336.64	0.679129
			13.6442	0.0425124	340.1	0.686108
			13.6483	0.0429437	343.55	0.693068
			13.6524	0.0433733	346.986	0.700002
			13.6565	0.0438009	350.407	0.706903
			13.6606	0.0442265	353.812	0.713772
			13.6647	0.04465	357.2	0.720606
			13.6687	0.0450706	360.565	0.727394
			13.6728	0.0454889	363.911	0.734145
			13.6769	0.0459055	367.244	0.740869
			13.681	0.0463197	370.558	0.747554
			13.6851	0.0467306	373.845	0.754186
			13.6892	0.0471383	377.106	0.760765
			13.6933	0.0475425	380.34	0.767288
			13.6974	0.047943	383.544	0.773752
			13.7015	0.0483404	386.723	0.780165
			13.7056	0.0487345	389.876	0.786526
			13.7097	0.0491246	392.997	0.792822
			13.7138	0.0495106	396.085	0.799051
			13.7179	0.0498925	399.14	0.805215
			13.722	0.0502702	402.162	0.811311
			13.7261	0.0506436	405.149	0.817336
			13.7302	0.0510122	408.098	0.823286
			13.7343	0.0513762	411.009	0.82916
			13.7384	0.0517352	413.882	0.834955
			13.7425	0.0520893	416.714	0.840669
			13.7466	0.0524383	419.506	0.846301
			13.7506	0.0527822	422.257	0.851851
			13.7547	0.0531207	424.966	0.857316
			13.7588	0.0534537	427.63	0.86269
			13.7629	0.0537812	430.25	0.867975
			13.767	0.0541032	432.826	0.873172
			13.7711	0.0544194	435.355	0.878275
			13.7752	0.0547297	437.838	0.883283
			13.7793	0.0550342	440.274	0.888197
			13.7834	0.0553331	442.664	0.89302
			13.7875	0.0556262	445.01	0.897752
			13.7916	0.0559132	447.305	0.902383
			13.7957	0.056194	449.552	0.906915
			13.7998	0.056469	451.752	0.911352
			13.8039	0.0567377	453.902	0.91569
			13.808	0.0570001	456.001	0.919925
			13.8121	0.0572558	458.047	0.924052
			13.8162	0.057505	460.04	0.928072
			13.8203	0.0577477	461.982	0.93199
			13.8244	0.0579839	463.872	0.935803
			13.8285	0.0582134	465.707	0.939505
			13.8325	0.0584357	467.486	0.943094
			13.8366	0.0586513	469.21	0.946573
			13.8407	0.0588601	470.881	0.949943
			13.8448	0.0590621	472.496	0.953202
			13.8489	0.0592573	474.059	0.956354
			13.853	0.0594461	475.569	0.959401
			13.8571	0.0596282	477.026	0.962339
			13.8612	0.0598034	478.427	0.965167
			13.8653	0.0599717	479.774	0.967884
			13.8694	0.0601333	481.067	0.970492
			13.8735	0.0602879	482.303	0.972986
			13.8776	0.0604352	483.482	0.975364
			13.8817	0.0605756	484.604	0.977629
			13.8858	0.0607096	485.677	0.979793
			13.8899	0.0608372	486.697	0.981851
			13.894	0.0609575	487.66	0.983792
			13.8981	0.0610709	488.567	0.985622
			13.9022	0.0611771	489.417	0.987337
			13.9063	0.0612757	490.206	0.988928
			13.9103	0.0613675	490.94	0.990409
			13.9144	0.0614527	491.622	0.991785
			13.9185	0.0615311	492.249	0.993051
			13.9226	0.0616026	492.821	0.994205
			13.9267	0.0616675	493.34	0.995252
			13.9308	0.061726	493.808	0.996195
			13.9349	0.0617778	494.222	0.997032
			13.939	0.0618232	494.586	0.997765
			13.9431	0.0618622	494.898	0.998394
			13.9472	0.0618947	495.158	0.998918
			13.9513	0.0619208	495.366	0.99934
			13.9554	0.0619406	495.525	0.999659
			13.9595	0.0619541	495.633	0.999877
			13.9636	0.0619611	495.689	0.99999
			13.9677	0.0619617	495.694	1
			13.9718	0.0619563	495.651	0.999913
			13.9759	0.0619446	495.557	0.999724
			13.98	0.0619266	495.413	0.999433
			13.9841	0.0619025	495.22	0.999045
			13.9882	0.0618723	494.978	0.998557
			13.9922	0.061836	494.688	0.997971
			13.9963	0.0617938	494.351	0.99729
			14.0004	0.0617457	493.965	0.996513
			14.0045	0.0616917	493.533	0.995641
			14.0086	0.0616323	493.058	0.994683
			14.0127	0.0615675	492.54	0.993638
			14.0168	0.0614974	491.979	0.992506
			14.0209	0.0614218	491.375	0.991287
			14.025	0.0613408	490.726	0.989979
			14.0291	0.0612544	490.035	0.988584
			14.0332	0.0611627	489.301	0.987104
			14.0373	0.0610655	488.524	0.985536
			14.0414	0.060963	487.704	0.983882
			14.0455	0.0608554	486.843	0.982145
			14.0496	0.0607428	485.942	0.980327
			14.0537	0.060625	485	0.978426
			14.0578	0.0605018	484.015	0.976439
			14.0619	0.0603739	482.991	0.974375
			14.066	0.0602414	481.931	0.972236
			14.07	0.0601045	480.836	0.970026
			14.0741	0.0599634	479.707	0.96775
			14.0782	0.0598183	478.546	0.965407
			14.0823	0.0596693	477.354	0.963002
			14.0864	0.0595162	476.13	0.960532
			14.0905	0.0593591	474.873	0.957997
			14.0946	0.0591981	473.585	0.955398
			14.0987	0.0590331	472.265	0.952735
			14.1028	0.0588641	470.913	0.950007
			14.1069	0.0586911	469.529	0.947215
			14.111	0.0585142	468.114	0.944361
			14.1151	0.0583335	466.668	0.941445
			14.1192	0.058149	465.192	0.938467
			14.1233	0.0579607	463.685	0.935427
			14.1274	0.0577685	462.148	0.932326
			14.1315	0.0575728	460.582	0.929167
			14.1356	0.0573736	458.989	0.925952
			14.1397	0.0571711	457.368	0.922683
			14.1438	0.0569655	455.724	0.919365
			14.1479	0.0567569	454.055	0.915999
			14.1519	0.0565454	452.363	0.912586
			14.156	0.0563307	450.646	0.909122
			14.1601	0.0561128	448.903	0.905604
			14.1642	0.0558919	447.136	0.90204
			14.1683	0.0556683	445.346	0.89843
			14.1724	0.055442	443.536	0.894778
			14.1765	0.0552132	441.706	0.891086
			14.1806	0.0549818	439.855	0.887352
			14.1847	0.0547476	437.981	0.883572
			14.1888	0.0545107	436.086	0.879749
			14.1929	0.0542714	434.171	0.875886
			14.197	0.0540297	432.238	0.871986
			14.2011	0.0537858	430.286	0.868049
			14.2052	0.0535396	428.317	0.864076
			14.2093	0.0532912	426.33	0.860067
			14.2134	0.0530409	424.327	0.856026
			14.2175	0.052789	422.312	0.851961
			14.2216	0.0525355	420.284	0.84787
			14.2257	0.0522803	418.242	0.843752
			14.2297	0.0520234	416.187	0.839606
			14.2338	0.0517648	414.118	0.835431
			14.2379	0.0515047	412.038	0.831235
			14.242	0.0512435	409.948	0.827019
			14.2461	0.0509809	407.847	0.822781
			14.2502	0.0507169	405.735	0.818519
			14.2543	0.0504513	403.61	0.814233
			14.2584	0.0501841	401.472	0.80992
			14.2625	0.0499153	399.323	0.805583
			14.2666	0.0496451	397.161	0.801223
			14.2707	0.0493736	394.989	0.79684
			14.2748	0.0491009	392.807	0.792439
			14.2789	0.0488271	390.617	0.788021
			14.283	0.0485524	388.419	0.783587
			14.2871	0.048277	386.216	0.779142
			14.2912	0.0480011	384.009	0.77469
			14.2953	0.0477249	381.799	0.770232
			14.2994	0.0474481	379.585	0.765764
			14.3035	0.0471706	377.365	0.761286
			14.3076	0.0468925	375.14	0.756798
			14.3116	0.0466139	372.911	0.752301
			14.3157	0.0463349	370.679	0.747798
			14.3198	0.0460556	368.445	0.743291
			14.3239	0.0457758	366.206	0.738775
			14.328	0.0454955	363.964	0.734251
			14.3321	0.0452146	361.717	0.729718
			14.3362	0.0449332	359.466	0.725177
			14.3403	0.0446514	357.211	0.720629
			14.3444	0.0443696	354.957	0.716081
			14.3485	0.0440878	352.703	0.711534
			14.3526	0.0438061	350.449	0.706987
			14.3567	0.0435245	348.196	0.702441
			14.3608	0.0432427	345.941	0.697893
			14.3649	0.0429608	343.687	0.693345
			14.369	0.0426792	341.433	0.688799
			14.3731	0.0423978	339.182	0.684257
			14.3772	0.0421168	336.934	0.679723
			14.3813	0.0418363	334.691	0.675196
			14.3854	0.0415559	332.448	0.670671
			14.3895	0.0412757	330.206	0.666148
			14.3935	0.0409958	327.967	0.661632
			14.3976	0.0407165	325.732	0.657123
			14.4017	0.0404375	323.5	0.65262
			14.4058	0.0401588	321.27	0.648123
			14.4099	0.0398804	319.043	0.643629
			14.414	0.0396023	316.818	0.639141
			14.4181	0.0393248	314.598	0.634663
			14.4222	0.0390479	312.383	0.630194
			14.4263	0.0387717	310.174	0.625736
			14.4304	0.0384963	307.97	0.621291
			14.4345	0.0382215	305.772	0.616856
			14.4386	0.0379473	303.578	0.612431
			14.4427	0.0376739	301.391	0.608019
			14.4468	0.0374016	299.212	0.603624
			14.4509	0.0371302	297.041	0.599243
			14.455	0.0368598	294.878	0.59488
			14.4591	0.0365903	292.722	0.590531
			14.4632	0.0363216	290.573	0.586194
			14.4673	0.0360538	288.431	0.581873
			14.4713	0.0357868	286.295	0.577564
			14.4754	0.0355206	284.164	0.573266
			14.4795	0.0352548	282.038	0.568977
			14.4836	0.0349895	279.916	0.564695
			14.4877	0.034725	277.8	0.560426
			14.4918	0.0344619	275.695	0.556181
			14.4959	0.0342005	273.604	0.551962
			14.5	0.0339403	271.523	0.547763
			14.5041	0.0336813	269.451	0.543583
			14.5082	0.0334238	267.391	0.539427
			14.5123	0.0331677	265.341	0.535293
			14.5164	0.0329124	263.299	0.531173
			14.5205	0.0326583	261.266	0.527072
			14.5246	0.0324055	259.244	0.522992
			14.5287	0.0321539	257.231	0.518932
			14.5328	0.0319035	255.228	0.514891
			14.5369	0.0316542	253.234	0.510868
			14.541	0.0314059	251.247	0.50686
			14.5451	0.0311585	249.268	0.502867
			14.5492	0.0309121	247.297	0.49889
			14.5532	0.0306668	245.334	0.494931
			14.5573	0.0304226	243.381	0.49099
			14.5614	0.0301797	241.438	0.48707
			14.5655	0.0299385	239.508	0.483177
			14.5696	0.0296991	237.593	0.479314
			14.5737	0.0294615	235.692	0.475479
			14.5778	0.0292256	233.804	0.471671
			14.5819	0.028991	231.928	0.467885
			14.586	0.0287577	230.062	0.464121
			14.5901	0.0285259	228.207	0.460379
			14.5942	0.0282954	226.364	0.45666
			14.5983	0.0280663	224.53	0.452961
			14.6024	0.0278386	222.708	0.449286
			14.6065	0.0276124	220.899	0.445636
			14.6106	0.0273872	219.098	0.442003
			14.6147	0.0271634	217.307	0.438389
			14.6188	0.0269409	215.527	0.434799
			14.6229	0.0267197	213.758	0.431229
			14.627	0.0264997	211.998	0.427679
			14.631	0.026281	210.248	0.424149
			14.6351	0.0260636	208.509	0.420641
			14.6392	0.0258477	206.781	0.417156
			14.6433	0.0256336	205.069	0.4137
			14.6474	0.0254215	203.372	0.410277
			14.6515	0.0252108	201.687	0.406878
			14.6556	0.0250014	200.011	0.403498
			14.6597	0.0247936	198.349	0.400144
			14.6638	0.0245873	196.698	0.396814
			14.6679	0.0243821	195.056	0.393502
			14.672	0.024178	193.424	0.390209
			14.6761	0.0239755	191.804	0.386941
			14.6802	0.0237744	190.195	0.383695
			14.6843	0.0235748	188.598	0.380473
			14.6884	0.0233766	187.012	0.377274
			14.6925	0.0231796	185.437	0.374096
			14.6966	0.0229839	183.871	0.370937
			14.7007	0.0227894	182.316	0.367799
			14.7048	0.0225965	180.772	0.364685
			14.7089	0.0224054	179.243	0.3616
			14.7129	0.0222159	177.727	0.358542
			14.717	0.0220277	176.222	0.355505
			14.7211	0.0218409	174.727	0.352491
			14.7252	0.0216555	173.244	0.349499
			14.7293	0.0214714	171.772	0.346527
			14.7334	0.0212887	170.309	0.343578
			14.7375	0.0211071	168.857	0.340648
			14.7416	0.0209269	167.415	0.337738
			14.7457	0.0207479	165.983	0.334851
			14.7498	0.0205705	164.564	0.331987
			14.7539	0.0203942	163.154	0.329142
			14.758	0.0202191	161.753	0.326315
			14.7621	0.020045	160.36	0.323505
			14.7662	0.0198723	158.979	0.32072
			14.7703	0.0197014	157.611	0.31796
			14.7744	0.0195317	156.254	0.315222
			14.7785	0.0193636	154.908	0.312508
			14.7826	0.0191967	153.574	0.309816
			14.7867	0.019031	152.248	0.307142
			14.7907	0.0188666	150.933	0.304487
			14.7948	0.0187034	149.628	0.301855
			14.7989	0.0185416	148.332	0.299242
			14.803	0.0183808	147.047	0.296648
			14.8071	0.0182212	145.769	0.294072
			14.8112	0.0180629	144.503	0.291517
			14.8153	0.017906	143.248	0.288984
			14.8194	0.0177501	142.001	0.286469
			14.8235	0.0175954	140.763	0.283971
			14.8276	0.0174416	139.533	0.28149
			14.8317	0.017289	138.312	0.279028
			14.8358	0.0171378	137.103	0.276588
			14.8399	0.0169879	135.903	0.274168
			14.844	0.0168392	134.714	0.271768
			14.8481	0.0166917	133.534	0.269387
			14.8522	0.0165453	132.362	0.267024
			14.8563	0.0164001	131.201	0.264681
			14.8604	0.0162565	130.052	0.262363
			14.8645	0.0161141	128.913	0.260065
			14.8686	0.0159726	127.781	0.257781
			14.8726	0.0158322	126.657	0.255515
			14.8767	0.0156929	125.544	0.253268
			14.8808	0.0155549	124.439	0.251041
			14.8849	0.0154182	123.346	0.248834
			14.889	0.0152828	122.262	0.246649
			14.8931	0.0151484	121.187	0.24448
			14.8972	0.0150148	120.119	0.242324
			14.9013	0.0148821	119.057	0.240183
			14.9054	0.0147505	118.004	0.238058
			14.9095	0.0146198	116.958	0.235949
			14.9136	0.0144901	115.921	0.233855
			14.9177	0.0143614	114.891	0.231778
			14.9218	0.0142338	113.871	0.22972
			14.9259	0.0141075	112.86	0.227681
			14.93	0.0139821	111.857	0.225658
			14.9341	0.0138579	110.863	0.223652
			14.9382	0.0137347	109.878	0.221664
			14.9423	0.0136125	108.9	0.219691
			14.9464	0.013491	107.928	0.217731
			14.9505	0.0133703	106.963	0.215784
			14.9545	0.0132507	106.006	0.213853
			14.9586	0.0131322	105.058	0.21194
			14.9627	0.0130148	104.118	0.210046
			14.9668	0.0128982	103.186	0.208164
			14.9709	0.0127826	102.26	0.206298
			14.975	0.012668	101.344	0.204448
			14.9791	0.0125544	100.435	0.202615
			14.9832	0.0124417	99.5336	0.200797
			14.9873	0.0123298	98.6384	0.198991
			14.9914	0.0122186	97.749	0.197196
			14.9955	0.0121083	96.8664	0.195416
			14.9996	0.0119991	95.9931	0.193654
			15.0037	0.0118912	95.1295	0.191912
			15.0078	0.0117844	94.2752	0.190188
			15.0119	0.0116787	93.4299	0.188483
			15.016	0.011574	92.5922	0.186793
			15.0201	0.0114704	91.7632	0.185121
			15.0242	0.0113678	90.9427	0.183465
			15.0283	0.011266	90.1284	0.181823
			15.0323	0.0111651	89.3209	0.180194
			15.0364	0.011065	88.52	0.178578
			15.0405	0.0109657	87.7254	0.176975
			15.0446	0.0108673	86.938	0.175387
			15.0487	0.0107695	86.1559	0.173809
			15.0528	0.0106724	85.3794	0.172242
			15.0569	0.0105761	84.609	0.170688
			15.061	0.0104804	83.8433	0.169143
			15.0651	0.0103854	83.0832	0.16761
			15.0692	0.0102914	82.3311	0.166093
			15.0733	0.0101985	81.5879	0.164593
			15.0774	0.0101067	80.8536	0.163112
			15.0815	0.0100158	80.1266	0.161645
			15.0856	0.0099258	79.4064	0.160192
			15.0897	0.00983676	78.694	0.158755
			15.0938	0.00974877	77.9902	0.157335
			15.0979	0.00966179	77.2943	0.155932
			15.102	0.0095754	76.6032	0.154537
			15.1061	0.00948963	75.917	0.153153
			15.1102	0.00940481	75.2385	0.151784
			15.1142	0.00932094	74.5675	0.150431
			15.1183	0.00923797	73.9038	0.149092
			15.1224	0.00915584	73.2467	0.147766
			15.1265	0.00907443	72.5954	0.146452
			15.1306	0.00899367	71.9494	0.145149
			15.1347	0.00891368	71.3094	0.143858
			15.1388	0.00883455	70.6764	0.142581
			15.1429	0.00875622	70.0498	0.141317
			15.147	0.0086787	69.4296	0.140066
			15.1511	0.00860192	68.8154	0.138826
			15.1552	0.00852582	68.2066	0.137598
			15.1593	0.00845053	67.6042	0.136383
			15.1634	0.00837616	67.0093	0.135183
			15.1675	0.00830255	66.4204	0.133995
			15.1716	0.0082295	65.836	0.132816
			15.1757	0.00815707	65.2565	0.131647
			15.1798	0.00808544	64.6835	0.130491
			15.1839	0.00801469	64.1175	0.129349
			15.188	0.00794472	63.5578	0.12822
			15.192	0.0078754	63.0032	0.127101
			15.1961	0.00780676	62.4541	0.125993
			15.2002	0.0077389	61.9112	0.124898
			15.2043	0.0076718	61.3744	0.123815
			15.2084	0.00760541	60.8433	0.122744
			15.2125	0.0075397	60.3176	0.121683
			15.2166	0.00747456	59.7965	0.120632
			15.2207	0.00740996	59.2797	0.119589
			15.2248	0.00734607	58.7686	0.118558
			15.2289	0.00728298	58.2639	0.11754
			15.233	0.00722068	57.7654	0.116534
			15.2371	0.00715903	57.2722	0.115539
			15.2412	0.00709782	56.7826	0.114552
			15.2453	0.00703702	56.2961	0.11357
			15.2494	0.00697672	55.8137	0.112597
			15.2535	0.00691719	55.3375	0.111636
			15.2576	0.00685837	54.867	0.110687
			15.2617	0.00679996	54.3997	0.109745
			15.2658	0.00674198	53.9359	0.108809
			15.2699	0.00668481	53.4785	0.107886
			15.2739	0.00662851	53.0281	0.106977
			15.278	0.00657257	52.5805	0.106075
			15.2821	0.00651708	52.1366	0.105179
			15.2862	0.00646252	51.7001	0.104299
			15.2903	0.00640862	51.269	0.103429
			15.2944	0.00635529	50.8423	0.102568
			15.2985	0.00630287	50.4229	0.101722
			15.3026	0.00625103	50.0082	0.100885
			15.3067	0.00619959	49.5967	0.100055
			15.3108	0.00614884	49.1907	0.0992361
			15.3149	0.00609867	48.7894	0.0984265
			15.319	0.00604912	48.393	0.0976268
			15.3231	0.00600017	48.0014	0.0968367
			15.3272	0.0059515	47.612	0.0960513
			15.3313	0.0059034	47.2272	0.0952749
			15.3354	0.00585607	46.8485	0.094511
			15.3395	0.00580933	46.4747	0.0937568
			15.3436	0.00576319	46.1055	0.093012
			15.3477	0.00571743	45.7395	0.0922736
			15.3517	0.00567225	45.378	0.0915444
			15.3558	0.00562772	45.0218	0.0908258
			15.3599	0.00558376	44.6701	0.0901163
			15.364	0.00554037	44.3229	0.089416
			15.3681	0.00549741	43.9793	0.0887226
			15.3722	0.00545491	43.6393	0.0880369
			15.3763	0.00541271	43.3016	0.0873556
			15.3804	0.0053709	42.9672	0.0866809
			15.3845	0.00532944	42.6355	0.0860118
			15.3886	0.00528835	42.3068	0.0853486
			15.3927	0.00524779	41.9824	0.0846941
			15.3968	0.00520769	41.6615	0.0840469
			15.4009	0.00516806	41.3445	0.0834073
			15.405	0.00512887	41.031	0.0827748
			15.4091	0.00509022	40.7217	0.082151
			15.4132	0.00505214	40.4172	0.0815365
			15.4173	0.00501457	40.1165	0.0809301
			15.4214	0.00497746	39.8197	0.0803312
			15.4255	0.00494088	39.527	0.0797408
			15.4296	0.00490493	39.2394	0.0791606
			15.4336	0.00486929	38.9544	0.0785855
			15.4377	0.00483407	38.6726	0.0780171
			15.4418	0.00479935	38.3948	0.0774567
			15.4459	0.00476506	38.1205	0.0769033
			15.45	0.00473129	37.8503	0.0763582
			15.4541	0.00469784	37.5827	0.0758184
			15.4582	0.0046648	37.3184	0.0752851
			15.4623	0.00463199	37.0559	0.0747556
			15.4664	0.00459964	36.7972	0.0742336
			15.4705	0.00456769	36.5415	0.0737179
			15.4746	0.00453605	36.2884	0.0732073
			15.4787	0.00450486	36.0388	0.0727038
			15.4828	0.00447381	35.7905	0.0722029
			15.4869	0.00444328	35.5462	0.07171
			15.491	0.00441308	35.3046	0.0712226
			15.4951	0.00438323	35.0659	0.070741
			15.4992	0.00435394	34.8316	0.0702683
			15.5033	0.00432456	34.5964	0.069794
			15.5074	0.00429563	34.3651	0.0693272
			15.5115	0.00426739	34.1391	0.0688713
			15.5155	0.00423916	33.9133	0.0684158
			15.5196	0.00421138	33.691	0.0679674
			15.5237	0.00418391	33.4713	0.0675241
			15.5278	0.0041566	33.2528	0.0670833
			15.5319	0.00412992	33.0394	0.0666528
			15.536	0.00410347	32.8278	0.0662259
			15.5401	0.00407713	32.617	0.0658007
			15.5442	0.00405145	32.4116	0.0653863
			15.5483	0.00402604	32.2083	0.0649762
			15.5524	0.00400068	32.0054	0.0645669
			15.5565	0.00397602	31.8082	0.064169
			15.5606	0.00395178	31.6142	0.0637777
			15.5647	0.00392732	31.4186	0.0633831
			15.5688	0.00390347	31.2278	0.0629981
			15.5729	0.00388039	31.0431	0.0626256
			15.577	0.0038571	30.8568	0.0622497
			15.5811	0.00383396	30.6717	0.0618763
			15.5852	0.00381176	30.4941	0.061518
			15.5893	0.00378987	30.3189	0.0611647
			15.5933	0.00376761	30.1408	0.0608054
			15.5974	0.00374577	29.9661	0.0604529
			15.6015	0.0037247	29.7976	0.0601128
			15.6056	0.00370345	29.6276	0.0597699
			15.6097	0.00368209	29.4567	0.0594252
			15.6138	0.00366122	29.2898	0.0590885
			15.6179	0.00364078	29.1263	0.0587586
			15.622	0.00362032	28.9626	0.0584284
			15.6261	0.00359987	28.799	0.0580983
			15.6302	0.00358033	28.6426	0.0577829
			15.6343	0.00356105	28.4884	0.0574718
			15.6384	0.00354121	28.3297	0.0571516
			15.6425	0.00352156	28.1725	0.0568345
			15.6466	0.0035027	28.0216	0.05653
			15.6507	0.00348412	27.8729	0.0562302
			15.6548	0.00346539	27.7231	0.0559279
			15.6589	0.00344658	27.5726	0.0556243
			15.663	0.00342873	27.4298	0.0553363
			15.6671	0.0034115	27.292	0.0550582
			15.6712	0.00339399	27.1519	0.0547756
			15.6752	0.00337611	27.0089	0.054487
			15.6793	0.00335856	26.8684	0.0542037
			15.6834	0.00334158	26.7326	0.0539297
			15.6875	0.00332497	26.5998	0.0536617
			15.6916	0.00330806	26.4645	0.0533887
			15.6957	0.00329099	26.3279	0.0531132
			15.6998	0.00327481	26.1985	0.0528521
			15.7039	0.0032595	26.076	0.0526051
			15.708	0.0032443	25.9544	0.0523597
			15.7121	0.00322823	25.8259	0.0521004
			15.7162	0.00321208	25.6966	0.0518397
			15.7203	0.00319681	25.5745	0.0515934
			15.7244	0.00318239	25.4591	0.0513606
			15.7285	0.00316802	25.3441	0.0511286
			15.7326	0.00315268	25.2214	0.050881
			15.7367	0.0031372	25.0976	0.0506313
			15.7408	0.0031225	24.98	0.050394
			15.7449	0.00310828	24.8662	0.0501645
			15.749	0.00309436	24.7549	0.0499398
			15.753	0.00308006	24.6405	0.0497091
			15.7571	0.00306537	24.523	0.0494721
			15.7612	0.0030513	24.4104	0.0492449
			15.7653	0.003038	24.304	0.0490303
			15.7694	0.00302542	24.2034	0.0488273
			15.7735	0.00301283	24.1027	0.0486241
			15.7776	0.00299925	23.994	0.0484048
			15.7817	0.00298537	23.8829	0.0481808
			15.7858	0.0029722	23.7776	0.0479683
			15.7899	0.0029596	23.6768	0.047765
			15.794	0.00294729	23.5784	0.0475664
			15.7981	0.0029351	23.4808	0.0473695
			15.8022	0.00292236	23.3789	0.0471639
			15.8063	0.00290921	23.2737	0.0469518
			15.8104	0.00289674	23.1739	0.0467505
			15.8145	0.002885	23.08	0.046561
			15.8186	0.00287372	22.9898	0.046379
			15.8227	0.00286258	22.9006	0.0461991
			15.8268	0.00285104	22.8083	0.0460129
			15.8309	0.00283878	22.7103	0.0458151
			15.8349	0.00282677	22.6142	0.0456213
			15.839	0.00281542	22.5234	0.0454381
			15.8431	0.0028046	22.4368	0.0452634
			15.8472	0.00279412	22.353	0.0450943
			15.8513	0.00278386	22.2709	0.0449288
			15.8554	0.00277314	22.1851	0.0447556
			15.8595	0.00276165	22.0932	0.0445703
			15.8636	0.00275039	22.0031	0.0443886
			15.8677	0.00273977	21.9182	0.0442171
			15.8718	0.00272974	21.8379	0.0440553
			15.8759	0.00272014	21.7611	0.0439004
			15.88	0.00271075	21.686	0.0437487
			15.8841	0.0027014	21.6112	0.0435978
			15.8882	0.00269142	21.5314	0.0434368
			15.8923	0.00268077	21.4461	0.0432649
			15.8964	0.00267048	21.3638	0.0430989
			15.9005	0.00266077	21.2862	0.0429422
			15.9046	0.00265162	21.213	0.0427945
			15.9087	0.00264298	21.1438	0.042655
			15.9128	0.00263482	21.0786	0.0425233
			15.9168	0.00262702	21.0162	0.0423975
			15.9209	0.00261884	20.9507	0.0422654
			15.925	0.00260949	20.8759	0.0421145
			15.9291	0.00259979	20.7983	0.041958
			15.9332	0.00259062	20.7249	0.0418099
			15.9373	0.00258195	20.6556	0.04167
			15.9414	0.00257375	20.59	0.0415377
			15.9455	0.00256598	20.5279	0.0414124
			15.9496	0.00255857	20.4686	0.0412927
			15.9537	0.0025514	20.4112	0.0411771
			15.9578	0.00254379	20.3503	0.0410542
			15.9619	0.00253494	20.2795	0.0409114
			15.966	0.00252575	20.206	0.0407631
			15.9701	0.0025171	20.1368	0.0406235
			15.9742	0.00250894	20.0715	0.0404918
			15.9783	0.00250124	20.0099	0.0403674
			15.9824	0.00249396	19.9517	0.04025
			15.9865	0.00248697	19.8958	0.0401372
			15.9906	0.00248011	19.8409	0.0400265
			15.9946	0.00247324	19.7859	0.0399157
			15.9987	0.00246569	19.7255	0.0397937
			16.0028	0.0024572	19.6576	0.0396568
			16.0069	0.00244878	19.5903	0.0395209
			16.011	0.00244083	19.5267	0.0393926
			16.0151	0.00243332	19.4666	0.0392714
			16.0192	0.00242624	19.4099	0.039157
			16.0233	0.00241956	19.3565	0.0390492
			16.0274	0.00241325	19.306	0.0389475
			16.0315	0.00240725	19.258	0.0388506
			16.0356	0.00240145	19.2116	0.038757
			16.0397	0.00239577	19.1661	0.0386653
			16.0438	0.00238949	19.1159	0.038564
			16.0479	0.00238206	19.0565	0.038444
			16.052	0.00237437	18.995	0.03832
			16.0561	0.00236711	18.9369	0.0382028
			16.0602	0.00236024	18.8819	0.038092
			16.0643	0.00235374	18.83	0.0379871
			16.0684	0.0023476	18.7808	0.0378878
			16.0725	0.0023418	18.7344	0.0377942
			16.0765	0.00233632	18.6905	0.0377058
			16.0806	0.00233112	18.6489	0.0376219
			16.0847	0.00232615	18.6092	0.0375417
			16.0888	0.00232137	18.5709	0.0374645
			16.0929	0.00231608	18.5286	0.0373792
			16.097	0.00230945	18.4756	0.0372722
			16.1011	0.00230228	18.4182	0.0371565
			16.1052	0.00229549	18.3639	0.0370469
			16.1093	0.00228908	18.3126	0.0369434
			16.1134	0.00228303	18.2643	0.0368459
			16.1175	0.00227733	18.2186	0.0367538
			16.1216	0.00227195	18.1756	0.036667
			16.1257	0.00226689	18.1351	0.0365853
			16.1298	0.0022621	18.0968	0.036508
			16.1339	0.00225756	18.0605	0.0364347
			16.138	0.00225324	18.0259	0.036365
			16.1421	0.00224915	17.9932	0.036299
			16.1462	0.0022448	17.9584	0.0362289
			16.1503	0.0022393	17.9144	0.03614
			16.1543	0.00223278	17.8622	0.0360348
			16.1584	0.00222625	17.81	0.0359294
			16.1625	0.00222012	17.761	0.0358305
			16.1666	0.00221435	17.7148	0.0357374
			16.1707	0.0022089	17.6712	0.0356494
			16.1748	0.00220375	17.63	0.0355663
			16.1789	0.00219887	17.591	0.0354876
			16.183	0.00219424	17.554	0.0354129
			16.1871	0.00218987	17.5189	0.0353423
			16.1912	0.00218571	17.4857	0.0352751
			16.1953	0.00218175	17.454	0.0352113
			16.1994	0.00217802	17.4242	0.0351511
			16.2035	0.00217419	17.3935	0.0350893
			16.2076	0.00216983	17.3586	0.0350189
			16.2117	0.00216454	17.3163	0.0349335
			16.2158	0.00215837	17.267	0.034834
			16.2199	0.00215238	17.2191	0.0347373
			16.224	0.0021467	17.1736	0.0346456
			16.2281	0.0021413	17.1304	0.0345585
			16.2322	0.00213623	17.0898	0.0344766
			16.2362	0.00213146	17.0517	0.0343996
			16.2403	0.00212696	17.0157	0.034327
			16.2444	0.00212272	16.9818	0.0342586
			16.2485	0.00211875	16.95	0.0341945
			16.2526	0.00211499	16.9199	0.0341339
			16.2567	0.00211144	16.8915	0.0340765
			16.2608	0.00210808	16.8646	0.0340222
			16.2649	0.0021049	16.8392	0.0339709
			16.269	0.0021018	16.8144	0.0339209
			16.2731	0.00209862	16.7889	0.0338696
			16.2772	0.00209526	16.7621	0.0338154
			16.2813	0.00209106	16.7285	0.0337476
			16.2854	0.00208573	16.6859	0.0336616
			16.2895	0.00208023	16.6419	0.0335729
			16.2936	0.00207503	16.6002	0.0334889
			16.2977	0.00207013	16.561	0.0334098
			16.3018	0.00206551	16.5241	0.0333353
			16.3059	0.00206116	16.4893	0.033265
			16.31	0.00205704	16.4563	0.0331986
			16.314	0.00205314	16.4251	0.0331355
			16.3181	0.00204945	16.3956	0.033076
			16.3222	0.00204597	16.3678	0.0330199
			16.3263	0.00204269	16.3415	0.0329669
			16.3304	0.00203957	16.3166	0.0329167
			16.3345	0.00203663	16.2931	0.0328692
			16.3386	0.00203387	16.271	0.0328246
			16.3427	0.00203127	16.2501	0.0327826
			16.3468	0.00202881	16.2305	0.032743
			16.3509	0.00202649	16.2119	0.0327055
			16.355	0.00202413	16.193	0.0326674
			16.3591	0.00202148	16.1718	0.0326246
			16.3632	0.00201839	16.1471	0.0325748
			16.3673	0.00201427	16.1142	0.0325083
			16.3714	0.00200932	16.0745	0.0324283
			16.3755	0.00200459	16.0368	0.0323521
			16.3796	0.00200012	16.001	0.03228
			16.3837	0.00199587	15.967	0.0322114
			16.3878	0.00199181	15.9345	0.0321458
			16.3919	0.00198794	15.9035	0.0320833
			16.3959	0.00198428	15.8742	0.0320243
			16.4	0.00198084	15.8467	0.0319687
			16.4041	0.0019776	15.8208	0.0319165
			16.4082	0.00197455	15.7964	0.0318672
			16.4123	0.00197166	15.7733	0.0318206
			16.4164	0.00196891	15.7513	0.0317762
			16.4205	0.0019663	15.7304	0.031734
			16.4246	0.00196382	15.7106	0.0316942
			16.4287	0.00196149	15.6919	0.0316565
			16.4328	0.00195929	15.6743	0.0316209
			16.4369	0.00195718	15.6575	0.031587
			16.441	0.00195518	15.6415	0.0315547
			16.4451	0.00195326	15.6261	0.0315237
			16.4492	0.00195133	15.6107	0.0314926
			16.4533	0.00194935	15.5948	0.0314606
			16.4574	0.0019466	15.5728	0.0314161
			16.4615	0.00194241	15.5393	0.0313485
			16.4656	0.00193771	15.5016	0.0312726
			16.4697	0.00193325	15.466	0.0312007
			16.4738	0.00192902	15.4322	0.0311325
			16.4778	0.00192504	15.4003	0.0310682
			16.4819	0.00192131	15.3705	0.031008
			16.486	0.00191778	15.3423	0.0309511
			16.4901	0.00191445	15.3156	0.0308973
			16.4942	0.0019113	15.2904	0.0308465
			16.4983	0.00190833	15.2666	0.0307985
			16.5024	0.0019055	15.244	0.0307528
			16.5065	0.00190279	15.2223	0.0307092
			16.5106	0.00190022	15.2017	0.0306676
			16.5147	0.00189777	15.1822	0.0306282
			16.5188	0.00189545	15.1636	0.0305907
			16.5229	0.00189325	15.146	0.0305551
			16.527	0.00189116	15.1293	0.0305214
			16.5311	0.00188919	15.1135	0.0304896
			16.5352	0.00188732	15.0986	0.0304595
			16.5393	0.00188555	15.0844	0.0304309
			16.5434	0.00188389	15.0711	0.030404
			16.5475	0.00188232	15.0586	0.0303788
			16.5516	0.00188085	15.0468	0.030355
			16.5556	0.00187936	15.0349	0.030331
			16.5597	0.00187772	15.0217	0.0303045
			16.5638	0.0018753	15.0024	0.0302654
			16.5679	0.0018714	14.9712	0.0302025
			16.572	0.00186694	14.9355	0.0301305
			16.5761	0.00186276	14.9021	0.0300631
			16.5802	0.00185882	14.8705	0.0299994
			16.5843	0.0018551	14.8408	0.0299394
			16.5884	0.00185158	14.8126	0.0298826
			16.5925	0.00184824	14.7859	0.0298287
			16.5966	0.00184506	14.7605	0.0297774
			16.6007	0.00184204	14.7363	0.0297287
			16.6048	0.00183919	14.7135	0.0296827
			16.6089	0.00183649	14.6919	0.0296391
			16.613	0.00183393	14.6714	0.0295977
			16.6171	0.0018315	14.652	0.0295585
			16.6212	0.00182923	14.6338	0.0295219
			16.6253	0.00182708	14.6166	0.0294872
			16.6294	0.00182502	14.6002	0.029454
			16.6335	0.00182305	14.5844	0.0294223
			16.6375	0.00182119	14.5695	0.0293922
			16.6416	0.00181943	14.5554	0.0293637
			16.6457	0.00181774	14.5419	0.0293365
			16.6498	0.00181614	14.5291	0.0293106
			16.6539	0.00181464	14.5171	0.0292864
			16.658	0.00181323	14.5058	0.0292637
			16.6621	0.0018119	14.4952	0.0292423
			16.6662	0.00181065	14.4852	0.0292221
			16.6703	0.00180948	14.4758	0.0292032
			16.6744	0.00180837	14.4669	0.0291852
			16.6785	0.00180731	14.4585	0.0291682
			16.6826	0.0018063	14.4504	0.0291518
			16.6867	0.00180534	14.4427	0.0291363
			16.6908	0.00180443	14.4355	0.0291218
			16.6949	0.00180348	14.4278	0.0291063
			16.699	0.00180232	14.4185	0.0290876
			16.7031	0.00180087	14.4069	0.0290642
			16.7072	0.00179849	14.3879	0.0290258
			16.7113	0.00179492	14.3593	0.0289682
			16.7153	0.00179107	14.3286	0.0289061
			16.7194	0.0017874	14.2992	0.0288469
			16.7235	0.00178395	14.2716	0.0287912
			16.7276	0.00178071	14.2457	0.0287389
			16.7317	0.00177766	14.2213	0.0286897
			16.7358	0.00177478	14.1983	0.0286432
			16.7399	0.00177206	14.1765	0.0285993
			16.744	0.00176949	14.1559	0.0285577
			16.7481	0.00176704	14.1363	0.0285183
			16.7522	0.00176472	14.1178	0.0284808
			16.7563	0.00176252	14.1001	0.0284453
			16.7604	0.00176045	14.0836	0.0284119
			16.7645	0.0017585	14.068	0.0283804
			16.7686	0.00175665	14.0532	0.0283505
			16.7727	0.00175488	14.039	0.028322
			16.7768	0.00175319	14.0255	0.0282947
			16.7809	0.00175158	14.0127	0.0282688
			16.785	0.00175004	14.0004	0.028244
			16.7891	0.00174857	13.9885	0.0282201
			16.7932	0.00174719	13.9775	0.0281978
			16.7972	0.00174591	13.9673	0.0281772
			16.8013	0.00174472	13.9578	0.028158
			16.8054	0.0017436	13.9488	0.0281399
			16.8095	0.00174253	13.9402	0.0281227
			16.8136	0.00174151	13.9321	0.0281062
			16.8177	0.00174052	13.9242	0.0280902
			16.8218	0.00173955	13.9164	0.0280746
			16.8259	0.00173862	13.9089	0.0280595
			16.83	0.00173774	13.9019	0.0280454
			16.8341	0.00173691	13.8953	0.028032
			16.8382	0.00173612	13.889	0.0280193
			16.8423	0.00173536	13.8829	0.028007
			16.8464	0.00173463	13.877	0.0279952
			16.8505	0.00173386	13.8709	0.0279828
			16.8546	0.00173293	13.8634	0.0279677
			16.8587	0.00173174	13.8539	0.0279485
			16.8628	0.00172965	13.8372	0.0279148
			16.8669	0.00172632	13.8105	0.027861
			16.871	0.00172265	13.7812	0.0278019
			16.875	0.00171916	13.7533	0.0277455
			16.8791	0.00171584	13.7267	0.0276919
			16.8832	0.00171271	13.7017	0.0276414
			16.8873	0.00170975	13.678	0.0275937
			16.8914	0.00170694	13.6555	0.0275483
			16.8955	0.00170425	13.634	0.0275049
			16.8996	0.00170171	13.6136	0.0274638
			16.9037	0.00169932	13.5946	0.0274254
			16.9078	0.00169707	13.5766	0.0273891
			16.9119	0.00169494	13.5595	0.0273546
			16.916	0.00169291	13.5433	0.0273218
			16.9201	0.00169097	13.5277	0.0272905
			16.9242	0.00168912	13.513	0.0272607
			16.9283	0.00168738	13.499	0.0272326
			16.9324	0.00168576	13.486	0.0272064
			16.9365	0.00168424	13.4739	0.027182
			16.9406	0.00168282	13.4625	0.027159
			16.9447	0.00168145	13.4516	0.027137
			16.9488	0.00168012	13.441	0.0271155
			16.9529	0.00167882	13.4306	0.0270945
			16.9569	0.00167758	13.4206	0.0270745
			16.961	0.00167645	13.4116	0.0270561
			16.9651	0.00167539	13.4032	0.0270392
			16.9692	0.00167441	13.3952	0.0270232
			16.9733	0.00167347	13.3877	0.0270081
			16.9774	0.00167258	13.3806	0.0269937
			16.9815	0.00167175	13.374	0.0269803
			16.9856	0.00167097	13.3678	0.0269678
			16.9897	0.00167024	13.3619	0.026956
			16.9938	0.00166956	13.3565	0.026945
			16.9979	0.00166891	13.3513	0.0269346
			17.002	0.00166833	13.3466	0.0269251
			17.0061	0.0016678	13.3424	0.0269166
			17.0102	0.00166729	13.3383	0.0269084
			17.0143	0.0016668	13.3344	0.0269005
			17.0184	0.00166631	13.3305	0.0268926
			17.0225	0.00166582	13.3266	0.0268847
			17.0266	0.00166533	13.3226	0.0268767
			17.0307	0.00166483	13.3187	0.0268687
			17.0348	0.00166434	13.3147	0.0268607
			17.0388	0.00166389	13.3111	0.0268535
			17.0429	0.00166352	13.3081	0.0268475
			17.047	0.00166307	13.3046	0.0268403
			17.0511	0.00166237	13.299	0.026829
			17.0552	0.0016613	13.2904	0.0268118
			17.0593	0.00165921	13.2737	0.0267781
			17.0634	0.00165591	13.2473	0.0267247
			17.0675	0.0016524	13.2192	0.0266681
			17.0716	0.0016491	13.1928	0.0266148
			17.0757	0.00164599	13.168	0.0265647
			17.0798	0.00164307	13.1446	0.0265175
			17.0839	0.00164031	13.1225	0.026473
			17.088	0.00163771	13.1017	0.026431
			17.0921	0.00163525	13.082	0.0263913
			17.0962	0.00163291	13.0633	0.0263536
			17.1003	0.0016307	13.0456	0.0263178
			17.1044	0.00162858	13.0287	0.0262837
			17.1085	0.00162658	13.0126	0.0262514
			17.1126	0.00162473	12.9979	0.0262216
			17.1166	0.00162301	12.9841	0.0261938
			17.1207	0.00162137	12.971	0.0261673
			17.1248	0.00161981	12.9585	0.0261421
			17.1289	0.00161832	12.9465	0.026118
			17.133	0.0016169	12.9352	0.0260951
			17.1371	0.00161554	12.9243	0.0260731
			17.1412	0.00161424	12.9139	0.0260521
			17.1453	0.00161301	12.9041	0.0260323
			17.1494	0.00161184	12.8948	0.0260136
			17.1535	0.00161074	12.8859	0.0259956
			17.1576	0.00160967	12.8774	0.0259785
			17.1617	0.00160866	12.8693	0.0259621
			17.1658	0.00160768	12.8614	0.0259463
			17.1699	0.00160674	12.8539	0.0259311
			17.174	0.00160585	12.8468	0.0259167
			17.1781	0.00160503	12.8402	0.0259036
			17.1822	0.00160429	12.8343	0.0258916
			17.1863	0.0016036	12.8288	0.0258805
			17.1904	0.00160295	12.8236	0.02587
			17.1945	0.00160232	12.8186	0.0258599
			17.1985	0.0016017	12.8136	0.0258498
			17.2026	0.00160108	12.8086	0.0258398
			17.2067	0.00160047	12.8037	0.0258299
			17.2108	0.00159988	12.799	0.0258204
			17.2149	0.00159936	12.7949	0.025812
			17.219	0.0015989	12.7912	0.0258046
			17.2231	0.00159846	12.7877	0.0257976
			17.2272	0.00159804	12.7843	0.0257908
			17.2313	0.00159763	12.7811	0.0257842
			17.2354	0.00159723	12.7778	0.0257776
			17.2395	0.00159681	12.7745	0.025771
			17.2436	0.0015964	12.7712	0.0257642
			17.2477	0.001596	12.768	0.0257579
			17.2518	0.00159565	12.7652	0.0257521
			17.2559	0.00159531	12.7625	0.0257468
			17.26	0.001595	12.76	0.0257417
			17.2641	0.0015947	12.7576	0.0257369
			17.2682	0.00159442	12.7554	0.0257323
			17.2723	0.00159414	12.7531	0.0257278
			17.2763	0.00159384	12.7507	0.025723
			17.2804	0.00159352	12.7482	0.0257179
			17.2845	0.00159327	12.7461	0.0257138
			17.2886	0.00159307	12.7446	0.0257106
			17.2927	0.00159288	12.7431	0.0257075
			17.2968	0.00159269	12.7416	0.0257045
			17.3009	0.0015925	12.74	0.0257013
			17.305	0.00159229	12.7383	0.0256979
			17.3091	0.00159207	12.7365	0.0256943
			17.3132	0.00159182	12.7345	0.0256903
			17.3173	0.00159149	12.7319	0.025685
			17.3214	0.00159105	12.7284	0.025678
			17.3255	0.00159056	12.7245	0.0256701
			17.3296	0.00159016	12.7213	0.0256637
			17.3337	0.00158983	12.7186	0.0256582
			17.3378	0.00158938	12.715	0.0256509
			17.3419	0.00158875	12.71	0.0256409
			17.346	0.00158725	12.698	0.0256166
			17.3501	0.00158432	12.6746	0.0255693
			17.3542	0.00158091	12.6473	0.0255143
			17.3582	0.00157769	12.6215	0.0254623
			17.3623	0.00157465	12.5972	0.0254133
			17.3664	0.00157178	12.5742	0.0253669
			17.3705	0.00156907	12.5526	0.0253233
			17.3746	0.00156655	12.5324	0.0252826
			17.3787	0.00156423	12.5138	0.025245
			17.3828	0.00156205	12.4964	0.02521
			17.3869	0.00156001	12.4801	0.0251769
			17.391	0.00155806	12.4645	0.0251456
			17.3951	0.00155622	12.4497	0.0251158
			17.3992	0.00155445	12.4356	0.0250873
			17.4033	0.00155278	12.4222	0.0250603
			17.4074	0.00155118	12.4094	0.0250344
			17.4115	0.00154964	12.3971	0.0250096
			17.4156	0.00154813	12.385	0.0249853
			17.4197	0.0015467	12.3736	0.0249621
			17.4238	0.00154542	12.3633	0.0249415
			17.4279	0.00154427	12.3542	0.024923
			17.432	0.00154319	12.3455	0.0249055
			17.436	0.00154215	12.3372	0.0248887
			17.4401	0.00154114	12.3291	0.0248725
			17.4442	0.00154017	12.3213	0.0248567
			17.4483	0.00153922	12.3138	0.0248415
			17.4524	0.00153831	12.3065	0.0248268
			17.4565	0.00153745	12.2996	0.0248129
			17.4606	0.00153664	12.2931	0.0247999
			17.4647	0.00153587	12.287	0.0247875
			17.4688	0.00153514	12.2811	0.0247756
			17.4729	0.00153444	12.2755	0.0247644
			17.477	0.00153377	12.2702	0.0247536
			17.4811	0.00153312	12.265	0.0247431
			17.4852	0.00153248	12.2598	0.0247327
			17.4893	0.00153185	12.2548	0.0247225
			17.4934	0.00153125	12.25	0.0247129
			17.4975	0.00153071	12.2457	0.0247041
			17.5016	0.0015302	12.2416	0.0246959
			17.5057	0.00152971	12.2377	0.024688
			17.5098	0.00152924	12.2339	0.0246804
			17.5139	0.00152879	12.2303	0.0246731
			17.5179	0.00152834	12.2267	0.0246659
			17.522	0.0015279	12.2232	0.0246588
			17.5261	0.00152749	12.22	0.0246522
			17.5302	0.00152712	12.217	0.0246462
			17.5343	0.00152677	12.2142	0.0246406
			17.5384	0.00152645	12.2116	0.0246354
			17.5425	0.00152615	12.2092	0.0246305
			17.5466	0.00152586	12.2069	0.0246259
			17.5507	0.00152559	12.2047	0.0246214
			17.5548	0.00152532	12.2026	0.0246171
			17.5589	0.00152506	12.2005	0.0246129
			17.563	0.0015248	12.1984	0.0246088
			17.5671	0.00152457	12.1966	0.024605
			17.5712	0.00152434	12.1948	0.0246014
			17.5753	0.00152413	12.193	0.0245979
			17.5794	0.00152392	12.1914	0.0245946
			17.5835	0.00152372	12.1898	0.0245913
			17.5876	0.00152352	12.1881	0.024588
			17.5917	0.00152331	12.1865	0.0245846
			17.5958	0.0015231	12.1848	0.0245814
			17.5998	0.00152293	12.1834	0.0245786
			17.6039	0.00152277	12.1821	0.024576
			17.608	0.00152261	12.1809	0.0245734
			17.6121	0.00152246	12.1797	0.0245709
			17.6162	0.00152231	12.1785	0.0245686
			17.6203	0.00152218	12.1774	0.0245664
			17.6244	0.00152204	12.1763	0.0245642
			17.6285	0.00152189	12.1752	0.0245618
			17.6326	0.00152174	12.1739	0.0245594
			17.6367	0.00152158	12.1727	0.0245568
			17.6408	0.00152141	12.1713	0.0245541
			17.6449	0.00152124	12.1699	0.0245512
			17.649	0.00152104	12.1684	0.0245481
			17.6531	0.00152086	12.1669	0.0245451
			17.6572	0.0015207	12.1656	0.0245425
			17.6613	0.00152054	12.1643	0.0245399
			17.6654	0.00152037	12.163	0.0245373
			17.6695	0.00152021	12.1617	0.0245346
			17.6736	0.00152003	12.1602	0.0245317
			17.6776	0.00151985	12.1588	0.0245289
			17.6817	0.0015197	12.1576	0.0245265
			17.6858	0.00151957	12.1565	0.0245243
			17.6899	0.00151944	12.1556	0.0245223
			17.694	0.00151932	12.1546	0.0245203
			17.6981	0.00151919	12.1535	0.0245182
			17.7022	0.00151906	12.1525	0.0245162
			17.7063	0.00151896	12.1516	0.0245144
			17.7104	0.00151885	12.1508	0.0245128
			17.7145	0.00151875	12.15	0.0245112
			17.7186	0.00151866	12.1493	0.0245096
			17.7227	0.00151856	12.1485	0.024508
			17.7268	0.00151845	12.1476	0.0245062
			17.7309	0.00151832	12.1466	0.0245042
			17.735	0.00151785	12.1428	0.0244966
			17.7391	0.00151624	12.1299	0.0244707
			17.7432	0.00151335	12.1068	0.024424
			17.7473	0.00151003	12.0803	0.0243704
			17.7514	0.00150684	12.0547	0.0243188
			17.7555	0.0015038	12.0304	0.0242698
			17.7595	0.00150091	12.0073	0.0242232
			17.7636	0.00149817	11.9854	0.024179
			17.7677	0.00149555	11.9644	0.0241366
			17.7718	0.00149307	11.9446	0.0240967
			17.7759	0.00149078	11.9262	0.0240597
			17.78	0.00148861	11.9089	0.0240247
			17.7841	0.00148657	11.8925	0.0239917
			17.7882	0.00148462	11.877	0.0239603
			17.7923	0.00148277	11.8622	0.0239305
			17.7964	0.00148101	11.8481	0.023902
			17.8005	0.00147931	11.8345	0.0238746
			17.8046	0.00147767	11.8214	0.0238481
			17.8087	0.00147615	11.8092	0.0238236
			17.8128	0.00147479	11.7983	0.0238017
			17.8169	0.00147352	11.7881	0.0237811
			17.821	0.0014723	11.7784	0.0237615
			17.8251	0.00147114	11.7691	0.0237427
			17.8292	0.00147002	11.7601	0.0237246
			17.8333	0.00146893	11.7515	0.0237071
			17.8373	0.00146789	11.7431	0.0236902
			17.8414	0.00146688	11.7351	0.023674
			17.8455	0.00146595	11.7276	0.023659
			17.8496	0.00146511	11.7209	0.0236454
			17.8537	0.00146432	11.7145	0.0236326
			17.8578	0.00146357	11.7086	0.0236206
			17.8619	0.00146286	11.7029	0.0236092
			17.866	0.00146219	11.6975	0.0235983
			17.8701	0.00146154	11.6923	0.0235878
			17.8742	0.00146091	11.6873	0.0235776
			17.8783	0.00146028	11.6823	0.0235675
			17.8824	0.00145969	11.6776	0.023558
			17.8865	0.00145913	11.673	0.0235489
			17.8906	0.00145857	11.6686	0.0235399
			17.8947	0.00145803	11.6642	0.0235311
			17.8988	0.00145754	11.6603	0.0235232
			17.9029	0.00145708	11.6566	0.0235158
			17.907	0.00145665	11.6532	0.0235088
			17.9111	0.00145624	11.6499	0.0235023
			17.9152	0.00145589	11.6471	0.0234965
			17.9192	0.0014556	11.6448	0.0234919
			17.9233	0.00145532	11.6425	0.0234873
			17.9274	0.00145504	11.6403	0.0234829
			17.9315	0.00145478	11.6382	0.0234786
			17.9356	0.00145451	11.6361	0.0234743
			17.9397	0.00145423	11.6339	0.0234698
			17.9438	0.00145393	11.6315	0.023465
			17.9479	0.00145363	11.629	0.0234601
			17.952	0.00145334	11.6268	0.0234555
			17.9561	0.00145309	11.6247	0.0234514
			17.9602	0.00145285	11.6228	0.0234475
			17.9643	0.00145262	11.621	0.0234439
			17.9684	0.00145241	11.6193	0.0234404
			17.9725	0.0014522	11.6176	0.023437
			17.9766	0.00145198	11.6159	0.0234336
			17.9807	0.00145177	11.6142	0.0234301
			17.9848	0.00145156	11.6125	0.0234267
			17.9889	0.00145136	11.6109	0.0234235
			17.993	0.00145117	11.6094	0.0234205
			17.9971	0.00145099	11.6079	0.0234175
			18.0011	0.00145078	11.6062	0.0234141
			18.0052	0.00145055	11.6044	0.0234104
			18.0093	0.00145033	11.6026	0.0234068
			18.0134	0.0014501	11.6008	0.0234032
			18.0175	0.00144989	11.5991	0.0233997
			18.0216	0.00144968	11.5974	0.0233964
			18.0257	0.00144947	11.5958	0.023393
			18.0298	0.00144926	11.594	0.0233895
			18.0339	0.00144902	11.5922	0.0233858
			18.038	0.00144881	11.5905	0.0233823
			18.0421	0.0014486	11.5888	0.023379
			18.0462	0.0014484	11.5872	0.0233758
			18.0503	0.00144823	11.5858	0.0233729
			18.0544	0.0014481	11.5848	0.0233709
			18.0585	0.00144802	11.5841	0.0233695
			18.0626	0.00144794	11.5835	0.0233683
			18.0667	0.00144785	11.5828	0.0233669
			18.0708	0.00144776	11.5821	0.0233654
			18.0749	0.00144765	11.5812	0.0233637
			18.0789	0.00144753	11.5803	0.0233617
			18.083	0.00144741	11.5792	0.0233597
			18.0871	0.00144728	11.5782	0.0233576
			18.0912	0.00144715	11.5772	0.0233555
			18.0953	0.00144701	11.5761	0.0233533
			18.0994	0.00144682	11.5746	0.0233503
			18.1035	0.00144658	11.5727	0.0233464
			18.1076	0.00144638	11.571	0.0233431
			18.1117	0.00144623	11.5699	0.0233407
			18.1158	0.0014461	11.5688	0.0233386
			18.1199	0.00144598	11.5678	0.0233366
			18.124	0.00144586	11.5669	0.0233348
			18.1281	0.00144576	11.5661	0.0233331
			18.1322	0.00144566	11.5653	0.0233315
			18.1363	0.00144557	11.5645	0.02333
			18.1404	0.00144547	11.5638	0.0233285
			18.1445	0.00144539	11.5631	0.0233271
			18.1486	0.00144531	11.5624	0.0233258
			18.1527	0.00144522	11.5617	0.0233243
			18.1568	0.00144511	11.5609	0.0233227
			18.1608	0.00144501	11.5601	0.023321
			18.1649	0.00144492	11.5594	0.0233196
			18.169	0.00144483	11.5587	0.0233182
			18.1731	0.00144474	11.5579	0.0233166
			18.1772	0.00144462	11.5569	0.0233147
			18.1813	0.00144449	11.5559	0.0233126
			18.1854	0.00144439	11.5551	0.023311
			18.1895	0.0014443	11.5544	0.0233095
			18.1936	0.0014442	11.5536	0.0233079
			18.1977	0.00144409	11.5527	0.0233062
			18.2018	0.00144397	11.5517	0.0233042
			18.2059	0.00144384	11.5507	0.0233022
			18.21	0.00144373	11.5499	0.0233004
			18.2141	0.00144363	11.549	0.0232987
			18.2182	0.00144352	11.5482	0.023297
			18.2223	0.00144342	11.5474	0.0232954
			18.2264	0.00144332	11.5466	0.0232938
			18.2305	0.00144323	11.5458	0.0232922
			18.2346	0.00144313	11.5451	0.0232907
			18.2386	0.00144303	11.5442	0.023289
			18.2427	0.00144292	11.5433	0.0232872
			18.2468	0.0014428	11.5424	0.0232854
			18.2509	0.00144269	11.5415	0.0232835
			18.255	0.00144256	11.5405	0.0232815
			18.2591	0.00144243	11.5394	0.0232793
			18.2632	0.00144229	11.5383	0.0232772
			18.2673	0.00144216	11.5373	0.0232751
			18.2714	0.00144204	11.5363	0.023273
			18.2755	0.00144191	11.5353	0.023271
			18.2796	0.00144164	11.5331	0.0232666
			18.2837	0.00144103	11.5282	0.0232567
			18.2878	0.00143994	11.5195	0.0232392
			18.2919	0.00143777	11.5021	0.0232041
			18.296	0.00143456	11.4764	0.0231523
			18.3001	0.00143136	11.4509	0.0231007
			18.3042	0.00142835	11.4268	0.0230521
			18.3083	0.00142549	11.4039	0.023006
			18.3124	0.00142278	11.3822	0.0229622
			18.3165	0.00142018	11.3614	0.0229203
			18.3205	0.00141769	11.3415	0.0228801
			18.3246	0.00141533	11.3226	0.022842
			18.3287	0.00141309	11.3047	0.0228059
			18.3328	0.00141099	11.2879	0.0227719
			18.3369	0.00140901	11.2721	0.0227399
			18.341	0.00140713	11.2571	0.0227097
			18.3451	0.00140535	11.2428	0.022681
			18.3492	0.00140367	11.2293	0.0226538
			18.3533	0.00140207	11.2166	0.022628
			18.3574	0.00140056	11.2045	0.0226036
			18.3615	0.00139914	11.1931	0.0225807
			18.3656	0.0013978	11.1824	0.0225591
			18.3697	0.00139657	11.1726	0.0225393
			18.3738	0.00139546	11.1637	0.0225213
			18.3779	0.0013944	11.1552	0.0225042
			18.382	0.00139338	11.147	0.0224877
			18.3861	0.00139239	11.1391	0.0224718
			18.3902	0.00139143	11.1314	0.0224562
			18.3943	0.0013905	11.124	0.0224413
			18.3983	0.00138961	11.1169	0.022427
			18.4024	0.00138877	11.1101	0.0224133
			18.4065	0.00138798	11.1038	0.0224006
			18.4106	0.00138724	11.0979	0.0223887
			18.4147	0.00138654	11.0923	0.0223773
			18.4188	0.00138588	11.087	0.0223667
			18.4229	0.00138525	11.082	0.0223566
			18.427	0.00138465	11.0772	0.0223469
			18.4311	0.00138408	11.0727	0.0223377
			18.4352	0.00138355	11.0684	0.0223291
			18.4393	0.00138304	11.0644	0.022321
			18.4434	0.00138254	11.0603	0.0223128
			18.4475	0.00138201	11.0561	0.0223042
			18.4516	0.00138147	11.0518	0.0222956
			18.4557	0.00138099	11.0479	0.0222878
			18.4598	0.00138054	11.0444	0.0222806
			18.4639	0.00138014	11.0411	0.0222741
			18.468	0.00137975	11.038	0.0222678
			18.4721	0.0013794	11.0352	0.0222621
			18.4762	0.00137908	11.0326	0.022257
			18.4802	0.00137879	11.0303	0.0222522
			18.4843	0.0013785	11.028	0.0222477
			18.4884	0.00137823	11.0259	0.0222433
			18.4925	0.00137798	11.0238	0.0222392
			18.4966	0.00137773	11.0218	0.0222351
			18.5007	0.00137747	11.0198	0.022231
			18.5048	0.00137719	11.0175	0.0222264
			18.5089	0.00137688	11.0151	0.0222215
			18.513	0.0013766	11.0128	0.022217
			18.5171	0.00137633	11.0106	0.0222126
			18.5212	0.00137606	11.0085	0.0222083
			18.5253	0.00137578	11.0063	0.0222037
			18.5294	0.0013755	11.004	0.0221991
			18.5335	0.00137525	11.002	0.0221951
			18.5376	0.00137504	11.0003	0.0221917
			18.5417	0.00137485	10.9988	0.0221888
			18.5458	0.00137469	10.9975	0.0221861
			18.5499	0.00137453	10.9962	0.0221835
			18.554	0.00137436	10.9949	0.0221808
			18.5581	0.00137419	10.9935	0.0221781
			18.5621	0.00137403	10.9922	0.0221755
			18.5662	0.00137387	10.9909	0.0221728
			18.5703	0.0013737	10.9896	0.0221701
			18.5744	0.00137352	10.9881	0.0221672
			18.5785	0.00137333	10.9866	0.0221641
			18.5826	0.00137315	10.9852	0.0221613
			18.5867	0.001373	10.984	0.0221589
			18.5908	0.00137285	10.9828	0.0221564
			18.5949	0.0013727	10.9816	0.0221541
			18.599	0.00137257	10.9805	0.0221519
			18.6031	0.00137245	10.9796	0.0221499
			18.6072	0.00137233	10.9787	0.0221481
			18.6113	0.00137223	10.9778	0.0221464
			18.6154	0.00137214	10.9771	0.022145
			18.6195	0.00137207	10.9765	0.0221438
			18.6236	0.00137199	10.9759	0.0221426
			18.6277	0.00137191	10.9753	0.0221413
			18.6318	0.00137183	10.9746	0.0221399
			18.6359	0.00137173	10.9738	0.0221383
			18.6399	0.00137161	10.9729	0.0221365
			18.644	0.0013715	10.972	0.0221347
			18.6481	0.00137141	10.9713	0.0221332
			18.6522	0.00137133	10.9707	0.022132
			18.6563	0.00137126	10.9701	0.0221308
			18.6604	0.00137119	10.9695	0.0221296
			18.6645	0.00137112	10.9689	0.0221285
			18.6686	0.00137103	10.9683	0.0221271
			18.6727	0.00137093	10.9675	0.0221255
			18.6768	0.00137082	10.9665	0.0221236
			18.6809	0.00137068	10.9654	0.0221214
			18.685	0.00137055	10.9644	0.0221193
			18.6891	0.00137045	10.9636	0.0221177
			18.6932	0.00137035	10.9628	0.0221161
			18.6973	0.00137025	10.962	0.0221145
			18.7014	0.00137014	10.9612	0.0221127
			18.7055	0.00137002	10.9602	0.0221108
			18.7096	0.00136989	10.9591	0.0221087
			18.7137	0.00136976	10.9581	0.0221065
			18.7178	0.00136961	10.9569	0.0221041
			18.7218	0.00136946	10.9557	0.0221017
			18.7259	0.00136935	10.9548	0.0220999
			18.73	0.00136923	10.9539	0.0220981
			18.7341	0.00136911	10.9529	0.0220961
			18.7382	0.00136899	10.9519	0.0220941
			18.7423	0.00136886	10.9509	0.0220921
			18.7464	0.00136872	10.9498	0.0220898
			18.7505	0.00136858	10.9486	0.0220875
			18.7546	0.00136843	10.9475	0.0220851
			18.7587	0.0013683	10.9464	0.0220829
			18.7628	0.00136816	10.9453	0.0220807
			18.7669	0.00136803	10.9442	0.0220786
			18.771	0.00136791	10.9433	0.0220767
			18.7751	0.0013678	10.9424	0.0220748
			18.7792	0.00136768	10.9414	0.022073
			18.7833	0.00136755	10.9404	0.022071
			18.7874	0.00136743	10.9394	0.022069
			18.7915	0.00136734	10.9387	0.0220674
			18.7956	0.00136726	10.9381	0.0220662
			18.7996	0.00136719	10.9375	0.022065
			18.8037	0.00136711	10.9369	0.0220638
			18.8078	0.00136703	10.9362	0.0220624
			18.8119	0.00136693	10.9355	0.0220609
			18.816	0.00136684	10.9347	0.0220595
			18.8201	0.00136676	10.9341	0.0220581
			18.8242	0.00136668	10.9334	0.0220568
			18.8283	0.0013666	10.9328	0.0220556
			18.8324	0.00136653	10.9322	0.0220544
			18.8365	0.00136644	10.9315	0.022053
			18.8406	0.00136633	10.9307	0.0220512
			18.8447	0.00136619	10.9295	0.0220489
			18.8488	0.00136604	10.9283	0.0220465
			18.8529	0.0013659	10.9272	0.0220443
			18.857	0.00136577	10.9262	0.0220421
			18.8611	0.00136564	10.9251	0.02204
			18.8652	0.0013655	10.924	0.0220378
			18.8693	0.00136534	10.9227	0.0220352
			18.8734	0.00136516	10.9213	0.0220323
			18.8775	0.001365	10.92	0.0220297
			18.8815	0.00136486	10.9189	0.0220275
			18.8856	0.00136473	10.9179	0.0220254
			18.8897	0.0013646	10.9168	0.0220233
			18.8938	0.00136448	10.9158	0.0220213
			18.8979	0.00136437	10.9149	0.0220195
			18.902	0.00136425	10.914	0.0220177
			18.9061	0.00136413	10.9131	0.0220157
			18.9102	0.001364	10.912	0.0220136
			18.9143	0.00136387	10.911	0.0220115
			18.9184	0.00136377	10.9101	0.0220098
			18.9225	0.00136366	10.9093	0.0220081
			18.9266	0.00136355	10.9084	0.0220063
			18.9307	0.00136346	10.9077	0.0220049
			18.9348	0.00136342	10.9073	0.0220042
			18.9389	0.00136336	10.9069	0.0220033
			18.943	0.00136329	10.9063	0.0220021
			18.9471	0.00136319	10.9055	0.0220005
			18.9512	0.00136305	10.9044	0.0219983
			18.9553	0.00136291	10.9033	0.021996
			18.9593	0.00136277	10.9021	0.0219937
			18.9634	0.00136264	10.9011	0.0219917
			18.9675	0.00136255	10.9004	0.0219902
			18.9716	0.00136245	10.8996	0.0219886
			18.9757	0.00136235	10.8988	0.021987
			18.9798	0.00136225	10.898	0.0219853
			18.9839	0.00136216	10.8973	0.0219838
			18.988	0.00136206	10.8965	0.0219823
			18.9921	0.00136195	10.8956	0.0219806
			18.9962	0.00136183	10.8946	0.0219786
			19.0003	0.00136174	10.8939	0.0219771
			19.0044	0.00136243	10.8994	0.0219883
			19.0085	0.00136446	10.9157	0.0220211
			19.0126	0.00136703	10.9362	0.0220625
			19.0167	0.00136984	10.9587	0.0221078
			19.0208	0.00137271	10.9817	0.0221542
			19.0249	0.00137542	11.0034	0.022198
			19.029	0.00137797	11.0238	0.0222391
			19.0331	0.00138038	11.0431	0.022278
			19.0372	0.00138268	11.0615	0.0223151
			19.0412	0.00138486	11.0788	0.0223502
			19.0453	0.0013869	11.0952	0.0223832
			19.0494	0.00138882	11.1105	0.0224141
			19.0535	0.00139062	11.1249	0.0224432
			19.0576	0.00139231	11.1385	0.0224705
			19.0617	0.00139393	11.1515	0.0224967
			19.0658	0.00139548	11.1639	0.0225217
			19.0699	0.00139695	11.1756	0.0225454
			19.074	0.00139833	11.1867	0.0225677
			19.0781	0.00139962	11.197	0.0225885
			19.0822	0.00140081	11.2065	0.0226077
			19.0863	0.0014019	11.2152	0.0226253
			19.0904	0.00140292	11.2234	0.0226417
			19.0945	0.00140389	11.2311	0.0226574
			19.0986	0.0014048	11.2384	0.022672
			19.1027	0.00140564	11.2451	0.0226857
			19.1068	0.00140644	11.2515	0.0226985
			19.1109	0.0014072	11.2576	0.0227108
			19.115	0.00140791	11.2633	0.0227223
			19.1191	0.00140858	11.2686	0.022733
			19.1231	0.0014092	11.2736	0.022743
			19.1272	0.00140978	11.2782	0.0227524
			19.1313	0.0014103	11.2824	0.0227609
			19.1354	0.00141077	11.2861	0.0227684
			19.1395	0.0014112	11.2896	0.0227754
			19.1436	0.00141164	11.2931	0.0227824
			19.1477	0.00141204	11.2964	0.022789
			19.1518	0.00141243	11.2994	0.0227951
			19.1559	0.00141279	11.3023	0.0228009
			19.16	0.00141312	11.305	0.0228063
			19.1641	0.00141343	11.3074	0.0228113
			19.1682	0.0014137	11.3096	0.0228157
			19.1723	0.00141393	11.3115	0.0228195
			19.1764	0.00141414	11.3131	0.0228228
[truncated: 445 more rows]

## Sheet: Figure 4F
hL1ORF1p-NTR(H6)			volume	OD280	OD280	OD280		volume	MW (peak 1)		volume	MW (peak 2)
hL1ORF1p-DNTR			(ml)	relative		normalized		(ml)	kDa		(ml)	kDa
Injection volume	100 µl
Superdex 200			11.003	0.000646847	5.17478	0.010343		13.853	102.91		18.0134	5.96255
			11.0071	0.000646905	5.17524	0.0103439		13.8571	103.027		18.0175	5.97976
			11.0112	0.000646964	5.17572	0.0103448		13.8612	103.141		18.0216	5.99676
			11.0153	0.00064705	5.1764	0.0103462		13.8653	103.251		18.0257	6.01385
			11.0194	0.00064717	5.17736	0.0103481		13.8694	103.343		18.0298	6.0317
			11.0235	0.00064728	5.17824	0.0103499		13.8735	103.419		18.0339	6.04792
			11.0275	0.000647378	5.17903	0.0103514		13.8776	103.495		18.038	6.06407
			11.0316	0.00064746	5.17968	0.0103528		13.8817	103.574		18.0421	6.07951
			11.0357	0.000647535	5.18028	0.010354		13.8858	103.654		18.0462	6.09512
			11.0398	0.000647614	5.18091	0.0103552		13.8899	103.746		18.0503	6.11026
			11.0439	0.00064769	5.18152	0.0103564		13.894	103.847		18.0544	6.12414
			11.048	0.000647757	5.18205	0.0103575		13.8981	103.962		18.0585	6.13943
			11.0521	0.000647842	5.18274	0.0103589		13.9022	104.073		18.0626	6.15455
			11.0562	0.000647971	5.18377	0.0103609		13.9063	104.182		18.0667	6.16928
			11.0603	0.000648092	5.18473	0.0103629		13.9104	104.287		18.0708	6.18433
			11.0644	0.000648197	5.18558	0.0103645		13.9144	104.39		18.0749	6.19989
			11.0685	0.000648249	5.18599	0.0103654		13.9185	104.483		18.079	6.21617
			11.0726	0.000648246	5.18597	0.0103653		13.9226	104.571		18.083	6.23295
			11.0767	0.000648283	5.18627	0.0103659		13.9267	104.654		18.0871	6.24854
			11.0808	0.000648372	5.18698	0.0103673		13.9308	104.731		18.0912	6.26237
			11.0849	0.000648472	5.18778	0.0103689		13.9349	104.797		18.0953	6.27592
			11.089	0.000648586	5.18869	0.0103708		13.939	104.854		18.0994	6.29
			11.0931	0.000648697	5.18958	0.0103725		13.9431	104.905		18.1035	6.30324
			11.0972	0.0006488	5.1904	0.0103742		13.9472	104.955		18.1076	6.31666
			11.1013	0.000648892	5.19114	0.0103757		13.9513	105.011		18.1117	6.32975
			11.1053	0.000648987	5.1919	0.0103772		13.9554	105.08		18.1158	6.34267
			11.1094	0.000649105	5.19284	0.0103791		13.9595	105.179		18.1199	6.35534
			11.1135	0.000649234	5.19387	0.0103811		13.9636	105.277		18.124	6.36794
			11.1176	0.000649376	5.19501	0.0103834		13.9677	105.387		18.1281	6.38014
			11.1217	0.000649518	5.19615	0.0103857		13.9718	105.487		18.1322	6.39198
			11.1258	0.000649639	5.19711	0.0103876		13.9759	105.599		18.1363	6.40376
			11.1299	0.000649731	5.19784	0.0103891		13.98	105.706		18.1404	6.41548
			11.134	0.000649781	5.19825	0.0103899		13.9841	105.803		18.1445	6.42715
			11.1381	0.000649812	5.1985	0.0103904		13.9882	105.892		18.1486	6.43881
			11.1422	0.000649849	5.19879	0.010391		13.9922	105.975		18.1527	6.44977
			11.1463	0.000649884	5.19907	0.0103915		13.9963	106.052		18.1568	6.46079
			11.1504	0.000649914	5.19931	0.010392		14.0004	106.121		18.1609	6.47151
			11.1545	0.000649933	5.19947	0.0103923		14.0045	106.177		18.1649	6.48367
			11.1586	0.000649945	5.19956	0.0103925		14.0086	106.218		18.169	6.49631
			11.1627	0.000649967	5.19973	0.0103928		14.0127	106.252		18.1731	6.50765
			11.1668	0.000650002	5.20001	0.0103934		14.0168	106.285		18.1772	6.51862
			11.1709	0.000650051	5.20041	0.0103942		14.0209	106.323		18.1813	6.52934
			11.175	0.000650105	5.20084	0.010395		14.025	106.369		18.1854	6.54005
			11.1791	0.000650159	5.20127	0.0103959		14.0291	106.441		18.1895	6.55062
			11.1832	0.000650211	5.20169	0.0103967		14.0332	106.523		18.1936	6.56095
			11.1872	0.000650257	5.20205	0.0103975		14.0373	106.627		18.1977	6.5711
			11.1913	0.00065031	5.20248	0.0103983		14.0414	106.734		18.2018	6.58112
			11.1954	0.000650393	5.20314	0.0103997		14.0455	106.845		18.2059	6.59084
			11.1995	0.000650482	5.20385	0.0104011		14.0496	106.949		18.21	6.60003
			11.2036	0.000650565	5.20452	0.0104024		14.0537	107.038		18.2141	6.60922
			11.2077	0.000650636	5.20509	0.0104035		14.0578	107.12		18.2182	6.61874
			11.2118	0.000650688	5.20551	0.0104044		14.0619	107.193		18.2223	6.62767
			11.2159	0.000650722	5.20577	0.0104049		14.066	107.253		18.2264	6.63626
			11.22	0.000650726	5.2058	0.010405		14.0701	107.306		18.2305	6.64548
			11.2241	0.000650701	5.20561	0.0104046		14.0741	107.345		18.2346	6.65473
			11.2282	0.000650716	5.20573	0.0104048		14.0782	107.362		18.2387	6.66449
			11.2323	0.000650808	5.20647	0.0104063		14.0823	107.356		18.2427	6.67457
			11.2364	0.000650898	5.20719	0.0104077		14.0864	107.343		18.2468	6.68493
			11.2405	0.000650984	5.20787	0.0104091		14.0905	107.363		18.2509	6.6954
			11.2446	0.000651055	5.20844	0.0104102		14.0946	107.375		18.255	6.70589
			11.2487	0.000651111	5.20889	0.0104111		14.0987	107.417		18.2591	6.7162
			11.2528	0.000651169	5.20935	0.0104121		14.1028	107.495		18.2632	6.7257
			11.2569	0.000651225	5.2098	0.010413		14.1069	107.603		18.2673	6.73425
			11.261	0.000651282	5.21025	0.0104139		14.111	107.719		18.2714	6.74317
			11.2651	0.000651337	5.2107	0.0104148		14.1151	107.824		18.2755	6.75286
			11.2691	0.000651389	5.21111	0.0104156		14.1192	107.924		18.2796	6.76236
			11.2732	0.000651435	5.21148	0.0104163					18.2837	6.77137
			11.2773	0.000651449	5.21159	0.0104165					18.2878	6.78014
			11.2814	0.000651448	5.21159	0.0104165					18.2919	6.78842
			11.2855	0.000651488	5.2119	0.0104172					18.296	6.79653
			11.2896	0.000651546	5.21237	0.0104181					18.3001	6.80521
			11.2937	0.000651623	5.21298	0.0104193					18.3042	6.81405
			11.2978	0.000651716	5.21373	0.0104208					18.3083	6.82294
			11.3019	0.000651821	5.21457	0.0104225					18.3124	6.83204
			11.306	0.000651932	5.21546	0.0104243					18.3165	6.84138
			11.3101	0.000652042	5.21633	0.010426					18.3206	6.85062
			11.3142	0.000652147	5.21718	0.0104277					18.3246	6.85958
			11.3183	0.000652248	5.21798	0.0104293					18.3287	6.86832
			11.3224	0.000652324	5.2186	0.0104305					18.3328	6.87673
			11.3265	0.00065236	5.21888	0.0104311					18.3369	6.88538
			11.3306	0.000652389	5.21911	0.0104316					18.341	6.89363
			11.3347	0.000652436	5.21948	0.0104323					18.3451	6.90091
			11.3388	0.000652474	5.21979	0.0104329					18.3492	6.90818
			11.3429	0.000652503	5.22002	0.0104334					18.3533	6.91526
			11.3469	0.000652525	5.2202	0.0104337					18.3574	6.92196
			11.351	0.000652562	5.22049	0.0104343					18.3615	6.92809
			11.3551	0.000652633	5.22106	0.0104355					18.3656	6.93382
			11.3592	0.000652731	5.22185	0.010437					18.3697	6.939
			11.3633	0.000652831	5.22265	0.0104386					18.3738	6.94476
			11.3674	0.000652954	5.22363	0.0104406					18.3779	6.95222
			11.3715	0.000653124	5.22499	0.0104433					18.382	6.96114
			11.3756	0.000653314	5.22651	0.0104464					18.3861	6.97065
			11.3797	0.000653505	5.22804	0.0104494					18.3902	6.9802
			11.3838	0.000653688	5.2295	0.0104523					18.3943	6.98956
			11.3879	0.000653855	5.23084	0.010455					18.3984	6.99897
			11.392	0.00065399	5.23192	0.0104572					18.4024	7.00747
			11.3961	0.000654058	5.23247	0.0104583					18.4065	7.01677
			11.4002	0.000654055	5.23244	0.0104582					18.4106	7.02697
			11.4043	0.000654043	5.23234	0.010458					18.4147	7.03662
			11.4084	0.000654051	5.23241	0.0104582					18.4188	7.04496
			11.4125	0.00065405	5.2324	0.0104581					18.4229	7.05208
			11.4166	0.000654033	5.23227	0.0104579					18.427	7.05891
			11.4207	0.000654017	5.23214	0.0104576					18.4311	7.06508
			11.4248	0.000654041	5.23232	0.010458					18.4352	7.07205
			11.4288	0.000654095	5.23276	0.0104589					18.4393	7.0797
			11.4329	0.00065416	5.23328	0.0104599					18.4434	7.08776
			11.437	0.000654237	5.2339	0.0104611					18.4475	7.09644
			11.4411	0.000654325	5.2346	0.0104625					18.4516	7.1056
			11.4452	0.00065441	5.23528	0.0104639					18.4557	7.11525
			11.4493	0.000654493	5.23594	0.0104652					18.4598	7.12453
			11.4534	0.000654573	5.23659	0.0104665					18.4639	7.13338
			11.4575	0.000654653	5.23722	0.0104678					18.468	7.14329
			11.4616	0.00065473	5.23784	0.010469					18.4721	7.15252
			11.4657	0.000654802	5.23841	0.0104701					18.4762	7.16166
			11.4698	0.000654865	5.23892	0.0104712					18.4803	7.16918
			11.4739	0.000654925	5.2394	0.0104721					18.4843	7.17704
			11.478	0.000655	5.24	0.0104733					18.4884	7.18435
			11.4821	0.000655093	5.24075	0.0104748					18.4925	7.19078
			11.4862	0.000655208	5.24167	0.0104767					18.4966	7.19717
			11.4903	0.000655334	5.24267	0.0104787					18.5007	7.20302
			11.4944	0.000655459	5.24367	0.0104807					18.5048	7.20921
			11.4985	0.000655581	5.24465	0.0104826					18.5089	7.21667
			11.5026	0.000655697	5.24557	0.0104845					18.513	7.22442
			11.5066	0.000655808	5.24646	0.0104862					18.5171	7.23187
			11.5107	0.000655915	5.24732	0.010488					18.5212	7.23875
			11.5148	0.000655994	5.24795	0.0104892					18.5253	7.24751
			11.5189	0.000656043	5.24834	0.01049					18.5294	7.25698
			11.523	0.000656115	5.24892	0.0104912					18.5335	7.26595
			11.5271	0.000656202	5.24962	0.0104925					18.5376	7.27305
			11.5312	0.000656286	5.25029	0.0104939					18.5417	7.28078
			11.5353	0.000656359	5.25087	0.010495					18.5458	7.28817
			11.5394	0.000656396	5.25117	0.0104956					18.5499	7.2941
			11.5435	0.000656433	5.25147	0.0104962					18.554	7.30038
			11.5476	0.000656512	5.25209	0.0104975					18.5581	7.3065
			11.5517	0.000656596	5.25277	0.0104988					18.5621	7.31158
			11.5558	0.000656672	5.25337	0.0105					18.5662	7.31483
			11.5599	0.000656726	5.25381	0.0105009					18.5703	7.31768
			11.564	0.000656787	5.2543	0.0105019					18.5744	7.32221
			11.5681	0.000656878	5.25503	0.0105034					18.5785	7.32706
			11.5722	0.000656973	5.25579	0.0105049					18.5826	7.33122
			11.5763	0.000657066	5.25653	0.0105064					18.5867	7.33666
			11.5804	0.000657154	5.25723	0.0105078					18.5908	7.3425
			11.5845	0.000657203	5.25763	0.0105085					18.5949	7.34791
			11.5885	0.000657217	5.25773	0.0105088					18.599	7.35409
			11.5926	0.000657259	5.25807	0.0105094					18.6031	7.35954
			11.5967	0.000657328	5.25862	0.0105105					18.6072	7.35504
			11.6008	0.000657401	5.2592	0.0105117					18.6113	7.35145
			11.6049	0.000657458	5.25966	0.0105126					18.6154	7.35334
			11.609	0.000657494	5.25995	0.0105132					18.6195	7.35768
			11.6131	0.000657517	5.26013	0.0105136					18.6236	7.36105
			11.6172	0.000657554	5.26044	0.0105142					18.6277	7.36323
			11.6213	0.000657606	5.26085	0.010515					18.6318	7.36462
			11.6254	0.000657652	5.26121	0.0105157					18.6359	7.36442
			11.6295	0.000657674	5.26139	0.0105161					18.64	7.36361
			11.6336	0.000657688	5.2615	0.0105163					18.644	7.36475
			11.6377	0.000657714	5.26171	0.0105167					18.6481	7.36446
			11.6418	0.000657749	5.26199	0.0105173					18.6522	7.36504
			11.6459	0.000657786	5.26229	0.0105179					18.6563	7.36405
			11.65	0.000657846	5.26277	0.0105188					18.6604	7.3645
			11.6541	0.000657937	5.26349	0.0105203					18.6645	7.36788
			11.6582	0.000658022	5.26418	0.0105216					18.6686	7.37001
			11.6623	0.0006581	5.2648	0.0105229					18.6727	7.37311
			11.6664	0.000658159	5.26527	0.0105238					18.6768	7.37628
			11.6704	0.000658203	5.26563	0.0105245					18.6809	7.37895
			11.6745	0.000658248	5.26598	0.0105253					18.685	7.37995
			11.6786	0.000658288	5.2663	0.0105259					18.6891	7.38068
			11.6827	0.000658333	5.26666	0.0105266					18.6932	7.38117
			11.6868	0.000658398	5.26718	0.0105277					18.6973	7.37842
			11.6909	0.000658463	5.26771	0.0105287					18.7014	7.37373
			11.695	0.000658517	5.26813	0.0105296					18.7055	7.37167
			11.6991	0.000658559	5.26847	0.0105302					18.7096	7.36936
			11.7032	0.000658608	5.26886	0.010531					18.7137	7.3666
			11.7073	0.000658676	5.26941	0.0105321					18.7178	7.36594
			11.7114	0.000658745	5.26996	0.0105332					18.7219	7.36533
			11.7155	0.000658832	5.27066	0.0105346					18.7259	7.3641
			11.7196	0.00065895	5.2716	0.0105365					18.73	7.36678
			11.7237	0.000659072	5.27258	0.0105384					18.7341	7.36871
			11.7278	0.000659193	5.27354	0.0105404					18.7382	7.368
			11.7319	0.000659307	5.27446	0.0105422					18.7423	7.36877
			11.736	0.000659408	5.27527	0.0105438					18.7464	7.36826
			11.7401	0.000659501	5.27601	0.0105453					18.7505	7.36668
			11.7442	0.000659592	5.27674	0.0105467					18.7546	7.3659
			11.7482	0.000659678	5.27742	0.0105481					18.7587	7.36428
			11.7523	0.000659762	5.2781	0.0105495					18.7628	7.3619
			11.7564	0.000659853	5.27882	0.0105509					18.7669	7.35941
			11.7605	0.000659944	5.27955	0.0105524					18.771	7.35555
			11.7646	0.000660038	5.2803	0.0105539					18.7751	7.34878
			11.7687	0.000660133	5.28106	0.0105554					18.7792	7.34257
			11.7728	0.000660227	5.28182	0.0105569					18.7833	7.33851
			11.7769	0.000660322	5.28258	0.0105584					18.7874	7.33496
			11.781	0.000660418	5.28334	0.01056					18.7915	7.33185
			11.7851	0.00066053	5.28424	0.0105617					18.7956	7.32782
			11.7892	0.00066067	5.28536	0.010564					18.7997	7.32496
			11.7933	0.000660809	5.28647	0.0105662					18.8037	7.32149
			11.7974	0.000660944	5.28755	0.0105684					18.8078	7.318
			11.8015	0.000661057	5.28845	0.0105702					18.8119	7.31682
			11.8056	0.000661131	5.28904	0.0105713					18.816	7.31659
			11.8097	0.000661187	5.2895	0.0105723					18.8201	7.31496
			11.8138	0.000661227	5.28982	0.0105729					18.8242	7.31214
			11.8179	0.000661242	5.28993	0.0105731					18.8283	7.3078
			11.822	0.000661247	5.28997	0.0105732					18.8324	7.30506
			11.8261	0.000661252	5.29002	0.0105733					18.8365	7.30177
			11.8301	0.000661248	5.28998	0.0105732
			11.8342	0.000661236	5.28988	0.010573
			11.8383	0.00066122	5.28976	0.0105728
			11.8424	0.000661208	5.28966	0.0105726
			11.8465	0.00066121	5.28968	0.0105726
			11.8506	0.00066123	5.28984	0.0105729
			11.8547	0.000661274	5.29019	0.0105736
			11.8588	0.000661367	5.29093	0.0105751
			11.8629	0.00066151	5.29208	0.0105774
			11.867	0.000662158	5.29727	0.0105878
			11.8711	0.000664204	5.31363	0.0106205
			11.8752	0.000667266	5.33813	0.0106694
			11.8793	0.000670351	5.3628	0.0107188
			11.8834	0.000673348	5.38678	0.0107667
			11.8875	0.000676214	5.40971	0.0108125
			11.8916	0.00067895	5.4316	0.0108563
			11.8957	0.000681545	5.45236	0.0108978
			11.8998	0.000683997	5.47198	0.010937
			11.9039	0.000686317	5.49053	0.0109741
			11.9079	0.000688504	5.50804	0.011009
			11.912	0.000690557	5.52446	0.0110419
			11.9161	0.000692473	5.53979	0.0110725
			11.9202	0.000694253	5.55402	0.011101
			11.9243	0.000695925	5.5674	0.0111277
			11.9284	0.000697538	5.5803	0.0111535
			11.9325	0.000699103	5.59282	0.0111785
			11.9366	0.000700581	5.60465	0.0112021
			11.9407	0.000701975	5.6158	0.0112244
			11.9448	0.000703298	5.62639	0.0112456
			11.9489	0.00070457	5.63656	0.0112659
			11.953	0.000705785	5.64628	0.0112854
			11.9571	0.000706942	5.65553	0.0113039
			11.9612	0.000708047	5.66438	0.0113215
			11.9653	0.000709108	5.67287	0.0113385
			11.9694	0.000710121	5.68097	0.0113547
			11.9735	0.00071108	5.68864	0.01137
			11.9776	0.000711968	5.69574	0.0113842
			11.9817	0.000712781	5.70225	0.0113972
			11.9858	0.000713547	5.70838	0.0114095
			11.9898	0.000714258	5.71407	0.0114208
			11.9939	0.000714904	5.71923	0.0114312
			11.998	0.000715607	5.72486	0.0114424
			12.0021	0.00071716	5.73728	0.0114673
			12.0062	0.000720277	5.76222	0.0115171
			12.0103	0.000724139	5.79311	0.0115788
			12.0144	0.000727819	5.82255	0.0116377
			12.0185	0.000731295	5.85036	0.0116933
			12.0226	0.000734576	5.87661	0.0117457
			12.0267	0.000737653	5.90122	0.0117949
			12.0308	0.00074052	5.92416	0.0118408
			12.0349	0.000743212	5.94569	0.0118838
			12.039	0.000745759	5.96607	0.0119245
			12.0431	0.000748168	5.98535	0.0119631
			12.0472	0.000750448	6.00359	0.0119995
			12.0513	0.000752607	6.02085	0.012034
			12.0554	0.000755244	6.04195	0.0120762
			12.0595	0.000759311	6.07449	0.0121412
			12.0636	0.000764334	6.11467	0.0122215
			12.0676	0.000769295	6.15436	0.0123009
			12.0717	0.000773989	6.19191	0.0123759
			12.0758	0.000778427	6.22742	0.0124469
			12.0799	0.000782625	6.261	0.012514
			12.084	0.000786596	6.29277	0.0125775
			12.0881	0.000790355	6.32284	0.0126376
			12.0922	0.000794527	6.35622	0.0127043
			12.0963	0.000800056	6.40045	0.0127927
			12.1004	0.000806391	6.45113	0.012894
			12.1045	0.000812521	6.50017	0.012992
			12.1086	0.000818305	6.54644	0.0130845
			12.1127	0.000823757	6.59006	0.0131717
			12.1168	0.000828904	6.63123	0.013254
			12.1209	0.000834142	6.67314	0.0133378
			12.125	0.000840343	6.72275	0.0134369
			12.1291	0.000847405	6.77924	0.0135498
			12.1332	0.000854481	6.83585	0.013663
			12.1373	0.000861407	6.89126	0.0137737
			12.1414	0.000867953	6.94362	0.0138784
			12.1455	0.00087438	6.99504	0.0139812
			12.1495	0.00088152	7.05216	0.0140953
			12.1536	0.000889735	7.11788	0.0142267
			12.1577	0.000898135	7.18508	0.014361
			12.1618	0.000906074	7.24859	0.0144879
			12.1659	0.000913589	7.30871	0.0146081
			12.17	0.000921053	7.36842	0.0147274
			12.1741	0.000929355	7.43484	0.0148602
			12.1782	0.000938427	7.50742	0.0150053
			12.1823	0.000947308	7.57847	0.0151473
			12.1864	0.00095588	7.64704	0.0152843
			12.1905	0.000964181	7.71345	0.0154171
			12.1946	0.000972885	7.78308	0.0155562
			12.1987	0.000982468	7.85974	0.0157095
			12.2028	0.000992273	7.93819	0.0158663
			12.2069	0.00100198	8.01585	0.0160215
			12.211	0.00101148	8.0918	0.0161733
			12.2151	0.00102163	8.17303	0.0163356
			12.2192	0.00103245	8.25963	0.0165087
			12.2233	0.00104317	8.34536	0.0166801
			12.2274	0.00105359	8.42872	0.0168467
			12.2314	0.00106395	8.51163	0.0170124
			12.2355	0.00107519	8.6015	0.017192
			12.2396	0.00108704	8.69631	0.0173815
			12.2437	0.00109856	8.78848	0.0175658
			12.2478	0.00110947	8.87576	0.0177402
			12.2519	0.00112036	8.96286	0.0179143
			12.256	0.00113221	9.05768	0.0181038
			12.2601	0.0011445	9.156	0.0183003
			12.2642	0.00115622	9.24974	0.0184877
			12.2683	0.00116752	9.34013	0.0186684
			12.2724	0.00117915	9.43322	0.0188544
			12.2765	0.00119174	9.5339	0.0190557
			12.2806	0.00120445	9.63562	0.019259
			12.2847	0.00121653	9.73223	0.019452
			12.2888	0.00122859	9.82868	0.0196448
			12.2929	0.00124159	9.93273	0.0198528
			12.297	0.001255	10.04	0.0200673
			12.3011	0.0012678	10.1424	0.0202718
			12.3052	0.00128032	10.2426	0.0204721
			12.3092	0.00129349	10.3479	0.0206827
			12.3133	0.00130723	10.4578	0.0209023
			12.3174	0.00132064	10.5651	0.0211167
			12.3215	0.00133348	10.6679	0.0213222
			12.3256	0.00134657	10.7726	0.0215314
			12.3297	0.00136025	10.882	0.0217501
			12.3338	0.00137369	10.9895	0.021965
			12.3379	0.00138671	11.0937	0.0221733
			12.342	0.00139958	11.1967	0.0223791
			12.3461	0.00141301	11.3041	0.0225938
			12.3502	0.00142693	11.4154	0.0228163
			12.3543	0.00144042	11.5234	0.023032
			12.3584	0.00145337	11.627	0.0232391
			12.3625	0.00146629	11.7303	0.0234457
			12.3666	0.00148001	11.8401	0.0236651
			12.3707	0.00149412	11.953	0.0238908
			12.3748	0.00150766	12.0613	0.0241072
			12.3789	0.00152061	12.1649	0.0243142
			12.383	0.00153381	12.2705	0.0245253
			12.3871	0.00154762	12.381	0.0247462
			12.3911	0.0015612	12.4896	0.0249633
			12.3952	0.00157435	12.5948	0.0251736
			12.3993	0.00158721	12.6977	0.0253792
			12.4034	0.00160042	12.8034	0.0255904
			12.4075	0.00161418	12.9134	0.0258104
			12.4116	0.00162763	13.021	0.0260255
			12.4157	0.00164062	13.125	0.0262332
			12.4198	0.00165329	13.2263	0.0264358
			12.4239	0.00166632	13.3305	0.0266441
			12.428	0.00167991	13.4393	0.0268614
			12.4321	0.00169319	13.5455	0.0270738
			12.4362	0.00170601	13.6481	0.0272787
			12.4403	0.00171847	13.7478	0.027478
			12.4444	0.00173125	13.85	0.0276823
			12.4485	0.00174487	13.9589	0.0279001
			12.4526	0.00175848	14.0678	0.0281177
			12.4567	0.00177135	14.1708	0.0283236
			12.4608	0.00178357	14.2685	0.0285189
			12.4649	0.00179564	14.3652	0.028712
			12.4689	0.0018085	14.468	0.0289176
			12.473	0.00182176	14.5741	0.0291295
			12.4771	0.00183446	14.6756	0.0293326
			12.4812	0.00184652	14.7722	0.0295255
			12.4853	0.00185796	14.8637	0.0297084
			12.4894	0.00186908	14.9527	0.0298863
			12.4935	0.00188073	15.0458	0.0300725
			12.4976	0.00189298	15.1438	0.0302684
			12.5017	0.00190451	15.2361	0.0304527
			12.5058	0.00191457	15.3165	0.0306135
			12.5099	0.00192268	15.3814	0.0307433
			12.514	0.00192905	15.4324	0.0308451
			12.5181	0.00193709	15.4967	0.0309737
			12.5222	0.00194836	15.5869	0.0311539
			12.5263	0.00196028	15.6822	0.0313444
			12.5304	0.00197198	15.7759	0.0315316
			12.5345	0.00198325	15.866	0.0317117
			12.5386	0.00199399	15.952	0.0318836
			12.5427	0.00200422	16.0337	0.032047
			12.5468	0.00201391	16.1113	0.032202
			12.5508	0.00202313	16.1851	0.0323495
			12.5549	0.00203259	16.2608	0.0325008
			12.559	0.00204324	16.3459	0.0326709
			12.5631	0.00205429	16.4343	0.0328477
			12.5672	0.00206472	16.5178	0.0330145
			12.5713	0.00207457	16.5965	0.0331719
			12.5754	0.00208385	16.6708	0.0333204
			12.5795	0.00209263	16.741	0.0334607
			12.5836	0.00210093	16.8074	0.0335934
			12.5877	0.00210876	16.8701	0.0337187
			12.5918	0.0021166	16.9328	0.0338441
			12.5959	0.00212539	17.0031	0.0339845
			12.6	0.00213487	17.079	0.0341362
			12.6041	0.00214405	17.1524	0.0342829
			12.6082	0.00215282	17.2226	0.0344232
			12.6123	0.00216117	17.2894	0.0345568
			12.6164	0.00216906	17.3525	0.0346829
			12.6205	0.0021765	17.412	0.0348018
			12.6246	0.00218351	17.4681	0.0349139
			12.6287	0.00219014	17.5211	0.0350199
			12.6327	0.00219645	17.5716	0.0351207
			12.6368	0.00220241	17.6193	0.0352161
			12.6409	0.00220806	17.6645	0.0353064
			12.645	0.00221399	17.7119	0.0354012
			12.6491	0.00222115	17.7692	0.0355157
			12.6532	0.0022291	17.8328	0.0356428
			12.6573	0.00223682	17.8945	0.0357662
			12.6614	0.0022441	17.9528	0.0358827
			12.6655	0.00225098	18.0078	0.0359927
			12.6696	0.00225747	18.0598	0.0360965
			12.6737	0.0022636	18.1088	0.0361946
			12.6778	0.00226939	18.1551	0.0362871
			12.6819	0.00227486	18.1988	0.0363745
			12.686	0.00228002	18.2401	0.036457
			12.6901	0.00228489	18.2791	0.0365349
			12.6942	0.00228949	18.3159	0.0366084
			12.6983	0.00229383	18.3506	0.0366779
			12.7024	0.00229793	18.3835	0.0367435
			12.7065	0.00230181	18.4145	0.0368055
			12.7105	0.0023057	18.4456	0.0368678
			12.7146	0.00231045	18.4836	0.0369436
			12.7187	0.00231621	18.5297	0.0370358
			12.7228	0.00232212	18.5769	0.0371302
			12.7269	0.00232792	18.6233	0.0372229
			12.731	0.00233352	18.6682	0.0373126
			12.7351	0.0023389	18.7112	0.0373985
			12.7392	0.00234398	18.7518	0.0374798
			12.7433	0.00234878	18.7902	0.0375565
			12.7474	0.00235331	18.8265	0.0376289
			12.7515	0.00235759	18.8607	0.0376973
			12.7556	0.00236162	18.8929	0.0377618
			12.7597	0.00236541	18.9233	0.0378225
			12.7638	0.00236899	18.9519	0.0378797
			12.7679	0.00237238	18.9791	0.0379339
			12.772	0.00237563	19.005	0.0379858
			12.7761	0.00237899	19.0319	0.0380396
			12.7802	0.00238328	19.0662	0.0381081
			12.7843	0.00238881	19.1105	0.0381967
			12.7884	0.00239469	19.1575	0.0382906
			12.7924	0.00240023	19.2019	0.0383793
			12.7965	0.00240546	19.2437	0.0384629
			12.8006	0.00241037	19.2829	0.0385413
			12.8047	0.00241495	19.3196	0.0386146
			12.8088	0.0024193	19.3544	0.0386841
			12.8129	0.00242343	19.3875	0.0387502
			12.817	0.00242738	19.419	0.0388133
			12.8211	0.00243112	19.4489	0.0388731
			12.8252	0.00243513	19.4811	0.0389373
			12.8293	0.00244033	19.5226	0.0390204
			12.8334	0.00244652	19.5722	0.0391194
			12.8375	0.00245272	19.6217	0.0392185
			12.8416	0.00245858	19.6686	0.0393122
			12.8457	0.00246411	19.7128	0.0394006
			12.8498	0.0024693	19.7544	0.0394837
			12.8539	0.00247421	19.7937	0.0395621
			12.858	0.00247958	19.8367	0.039648
			12.8621	0.00248604	19.8883	0.0397513
			12.8662	0.00249282	19.9426	0.0398597
			12.8702	0.00249964	19.9971	0.0399688
			12.8743	0.00250636	20.0509	0.0400762
			12.8784	0.00251274	20.1019	0.0401782
			12.8825	0.00251935	20.1548	0.040284
			12.8866	0.00252719	20.2175	0.0404093
			12.8907	0.00253569	20.2855	0.0405451
			12.8948	0.00254377	20.3501	0.0406743
			12.8989	0.00255142	20.4114	0.0407967
			12.903	0.00255935	20.4748	0.0409234
			12.9071	0.00256856	20.5485	0.0410707
			12.9112	0.0025784	20.6272	0.0412281
			12.9153	0.00258781	20.7025	0.0413786
			12.9194	0.00259745	20.7796	0.0415327
			12.9235	0.0026079	20.8632	0.0416998
			12.9276	0.00261858	20.9486	0.0418706
			12.9317	0.00262959	21.0367	0.0420466
			12.9358	0.00264134	21.1307	0.0422345
			12.9399	0.00265374	21.2299	0.0424327
			12.944	0.00266636	21.3309	0.0426345
			12.9481	0.00267974	21.4379	0.0428486
			12.9521	0.0026936	21.5488	0.0430701
			12.9562	0.0027076	21.6608	0.0432939
			12.9603	0.00272246	21.7797	0.0435316
			12.9644	0.00273782	21.9026	0.0437772
			12.9685	0.00275346	22.0277	0.0440273
			12.9726	0.00276975	22.158	0.0442877
			12.9767	0.00278655	22.2924	0.0445564
			12.9808	0.00280422	22.4338	0.044839
			12.9849	0.00282277	22.5821	0.0451355
			12.989	0.00284207	22.7365	0.0454441
			12.9931	0.00286203	22.8963	0.0457634
			12.9972	0.00288278	23.0622	0.046095
			13.0013	0.00290434	23.2347	0.0464398
			13.0054	0.00292657	23.4126	0.0467953
			13.0095	0.0029495	23.596	0.0471619
			13.0136	0.00297317	23.7854	0.0475404
			13.0177	0.00299793	23.9835	0.0479364
			13.0218	0.00302345	24.1876	0.0483443
			13.0259	0.00304973	24.3978	0.0487645
			13.0299	0.00307711	24.6168	0.0492023
			13.034	0.00310522	24.8418	0.0496519
			13.0381	0.0031342	25.0736	0.0501152
			13.0422	0.00316433	25.3146	0.0505969
			13.0463	0.00319538	25.563	0.0510934
			13.0504	0.00322745	25.8196	0.0516063
			13.0545	0.00326077	26.0861	0.052139
			13.0586	0.00329521	26.3617	0.0526897
			13.0627	0.0033308	26.6464	0.0532588
			13.0668	0.00336761	26.9409	0.0538474
			13.0709	0.00340562	27.245	0.0544552
			13.075	0.00344496	27.5597	0.0550843
			13.0791	0.00348563	27.885	0.0557345
			13.0832	0.00352749	28.2199	0.0564038
			13.0873	0.00357086	28.5669	0.0570973
			13.0914	0.00361588	28.927	0.0578172
			13.0955	0.00366226	29.2981	0.0585588
			13.0996	0.00371007	29.6806	0.0593233
			13.1037	0.00375936	30.0748	0.0601114
			13.1078	0.00381015	30.4812	0.0609235
			13.1118	0.00386269	30.9015	0.0617637
			13.1159	0.00391698	31.3359	0.0626318
			13.12	0.00397292	31.7834	0.0635263
			13.1241	0.00403066	32.2453	0.0644494
			13.1282	0.00409023	32.7219	0.065402
			13.1323	0.00415176	33.2141	0.0663858
			13.1364	0.00421526	33.7221	0.0674011
			13.1405	0.00428064	34.2452	0.0684467
			13.1446	0.00434782	34.7826	0.0695208
			13.1487	0.00441692	35.3353	0.0706256
			13.1528	0.00448818	35.9054	0.0717651
			13.1569	0.00456159	36.4928	0.072939
			13.161	0.00463717	37.0973	0.0741474
			13.1651	0.00471504	37.7203	0.0753925
			13.1692	0.00479529	38.3623	0.0766757
			13.1733	0.00487763	39.021	0.0779923
			13.1774	0.00496212	39.6969	0.0793433
			13.1815	0.00504901	40.3921	0.0807326
			13.1856	0.00513839	41.1071	0.0821618
			13.1897	0.00523048	41.8438	0.0836343
			13.1937	0.0053253	42.6024	0.0851505
			13.1978	0.00542285	43.3828	0.0867103
			13.2019	0.00552315	44.1852	0.088314
			13.206	0.0056263	45.0104	0.0899634
			13.2101	0.00573233	45.8586	0.0916587
			13.2142	0.00584116	46.7293	0.093399
			13.2183	0.00595275	47.622	0.0951833
			13.2224	0.00606697	48.5358	0.0970096
			13.2265	0.00618422	49.4737	0.0988844
			13.2306	0.00630491	50.4393	0.100814
			13.2347	0.00642904	51.4323	0.102799
			13.2388	0.00655646	52.4517	0.104837
			13.2429	0.00668726	53.4981	0.106928
			13.247	0.00682148	54.5719	0.109074
			13.2511	0.0069589	55.6712	0.111272
			13.2552	0.00709934	56.7947	0.113517
			13.2593	0.0072432	57.9456	0.115817
			13.2634	0.00739134	59.1307	0.118186
			13.2675	0.00754372	60.3498	0.120623
			13.2715	0.00769984	61.5987	0.123119
			13.2756	0.00785964	62.8771	0.125674
			13.2797	0.00802344	64.1875	0.128293
			13.2838	0.00819142	65.5313	0.130979
			13.2879	0.00836351	66.9081	0.133731
			13.292	0.00853974	68.3179	0.136549
			13.2961	0.00872001	69.7601	0.139431
			13.3002	0.00890426	71.2341	0.142377
			13.3043	0.00909266	72.7413	0.14539
			13.3084	0.00928518	74.2815	0.148468
			13.3125	0.00948176	75.8541	0.151611
			13.3166	0.00968274	77.4619	0.154825
			13.3207	0.00988815	79.1052	0.15811
			13.3248	0.0100979	80.7833	0.161464
			13.3289	0.0103122	82.4979	0.164891
			13.333	0.0105313	84.2503	0.168393
			13.3371	0.0107551	86.0412	0.171973
			13.3412	0.0109837	87.8695	0.175627
			13.3453	0.011217	89.7361	0.179358
			13.3494	0.0114553	91.6422	0.183168
			13.3534	0.0116983	93.5864	0.187054
			13.3575	0.0119459	95.5669	0.191012
			13.3616	0.0121983	97.5861	0.195048
			13.3657	0.0124557	99.6455	0.199164
			13.3698	0.0127178	101.742	0.203354
			13.3739	0.0129846	103.877	0.207622
			13.378	0.0132567	106.054	0.211973
			13.3821	0.013534	108.272	0.216406
			13.3862	0.0138158	110.526	0.220912
			13.3903	0.0141023	112.819	0.225493
			13.3944	0.0143942	115.154	0.23016
			13.3985	0.0146912	117.53	0.23491
			13.4026	0.0149933	119.946	0.23974
			13.4067	0.0153001	122.401	0.244646
			13.4108	0.0156117	124.894	0.249628
			13.4149	0.0159284	127.427	0.254692
			13.419	0.0162506	130.005	0.259845
			13.4231	0.0165779	132.623	0.265077
			13.4272	0.0169101	135.281	0.270389
			13.4312	0.017247	137.976	0.275777
			13.4353	0.0175887	140.71	0.28124
			13.4394	0.0179349	143.479	0.286775
			13.4435	0.0182854	146.283	0.29238
			13.4476	0.0186409	149.127	0.298065
			13.4517	0.0190015	152.012	0.30383
			13.4558	0.0193664	154.931	0.309664
			13.4599	0.0197354	157.884	0.315566
			13.464	0.0201093	160.875	0.321544
			13.4681	0.0204884	163.907	0.327605
			13.4722	0.0208728	166.982	0.333751
			13.4763	0.0212618	170.095	0.339972
			13.4804	0.0216554	173.243	0.346265
			13.4845	0.0220536	176.429	0.352633
			13.4886	0.0224563	179.65	0.359071
			13.4927	0.0228626	182.901	0.365569
			13.4968	0.0232727	186.182	0.372126
			13.5009	0.023687	189.496	0.37875
			13.505	0.0241053	192.842	0.385439
			13.5091	0.0245274	196.219	0.392189
			13.5131	0.0249529	199.623	0.398992
			13.5172	0.0253817	203.054	0.405849
			13.5213	0.025814	206.512	0.41276
			13.5254	0.0262495	209.996	0.419724
			13.5295	0.0266882	213.506	0.426739
			13.5336	0.02713	217.04	0.433803
			13.5377	0.0275747	220.597	0.440914
			13.5418	0.0280221	224.177	0.448068
			13.5459	0.0284727	227.782	0.455273
			13.55	0.0289264	231.412	0.462528
			13.5541	0.0293829	235.063	0.469826
			13.5582	0.0298414	238.731	0.477158
			13.5623	0.0303021	242.417	0.484525
			13.5664	0.0307652	246.121	0.491929
			13.5705	0.0312302	249.842	0.499365
			13.5746	0.0316971	253.577	0.50683
			13.5787	0.0321654	257.323	0.514318
			13.5828	0.0326346	261.076	0.52182
			13.5869	0.0331045	264.836	0.529334
			13.591	0.0335751	268.601	0.53686
			13.595	0.0340465	272.372	0.544397
			13.5991	0.0345186	276.149	0.551945
			13.6032	0.034991	279.928	0.559499
			13.6073	0.0354639	283.711	0.567061
			13.6114	0.0359376	287.501	0.574635
			13.6155	0.0364119	291.295	0.582219
			13.6196	0.0368868	295.094	0.589812
			13.6237	0.0373618	298.894	0.597407
			13.6278	0.0378366	302.692	0.604999
			13.6319	0.0383109	306.488	0.612584
			13.636	0.0387846	310.277	0.620158
			13.6401	0.0392572	314.058	0.627715
			13.6442	0.0397287	317.83	0.635254
			13.6483	0.0401985	321.588	0.642766
			13.6524	0.0406663	325.33	0.650246
			13.6565	0.0411326	329.061	0.657702
			13.6606	0.0415973	332.779	0.665133
			13.6647	0.04206	336.48	0.672531
			13.6688	0.0425203	340.162	0.679891
			13.6728	0.0429784	343.827	0.687216
			13.6769	0.0434344	347.475	0.694507
			13.681	0.0438881	351.105	0.701762
			13.6851	0.0443394	354.715	0.708978
			13.6892	0.0447887	358.31	0.716163
			13.6933	0.0452361	361.889	0.723316
			13.6974	0.0456804	365.443	0.73042
			13.7015	0.0461214	368.971	0.737471
			13.7056	0.046559	372.472	0.74447
			13.7097	0.0469928	375.943	0.751406
			13.7138	0.047422	379.376	0.758269
			13.7179	0.0478468	382.774	0.765061
			13.722	0.0482671	386.137	0.771782
			13.7261	0.048683	389.464	0.778431
			13.7302	0.0490941	392.753	0.785006
			13.7343	0.0495004	396.003	0.791501
			13.7384	0.0499016	399.213	0.797917
			13.7425	0.0502982	402.385	0.804258
			13.7466	0.0506898	405.518	0.81052
			13.7507	0.0510764	408.611	0.816701
			13.7547	0.0514581	411.665	0.822805
			13.7588	0.0518351	414.681	0.828833
			13.7629	0.0522073	417.658	0.834784
			13.767	0.0525741	420.593	0.84065
			13.7711	0.0529354	423.483	0.846427
			13.7752	0.053291	426.328	0.852112
			13.7793	0.0536408	429.126	0.857705
			13.7834	0.0539846	431.877	0.863203
			13.7875	0.0543221	434.577	0.868599
			13.7916	0.0546534	437.227	0.873897
			13.7957	0.0549785	439.828	0.879095
			13.7998	0.0552971	442.377	0.884189
			13.8039	0.055609	444.872	0.889177
			13.808	0.0559143	447.315	0.894059
			13.8121	0.0562131	449.705	0.898836
			13.8162	0.0565053	452.043	0.903509
			13.8203	0.0567909	454.327	0.908075
			13.8244	0.0570699	456.559	0.912536
			13.8285	0.0573426	458.741	0.916896
			13.8325	0.0576087	460.869	0.921151
			13.8366	0.057868	462.944	0.925297
			13.8407	0.0581206	464.965	0.929337
			13.8448	0.0583666	466.933	0.93327
			13.8489	0.0586059	468.847	0.937096
			13.853	0.058838	470.704	0.940808
			13.8571	0.0590629	472.503	0.944404
			13.8612	0.0592807	474.246	0.947887
			13.8653	0.0594914	475.931	0.951256
			13.8694	0.0596947	477.557	0.954506
			13.8735	0.0598905	479.124	0.957637
			13.8776	0.060079	480.632	0.960652
			13.8817	0.0602604	482.084	0.963553
			13.8858	0.0604345	483.476	0.966336
			13.8899	0.0606009	484.807	0.968996
			13.894	0.0607601	486.081	0.971543
			13.8981	0.0609126	487.3	0.97398
			13.9022	0.0610578	488.462	0.976302
			13.9063	0.0611961	489.569	0.978514
			13.9104	0.061328	490.624	0.980623
			13.9144	0.0614531	491.625	0.982623
			13.9185	0.0615714	492.571	0.984515
			13.9226	0.0616831	493.465	0.9863
			13.9267	0.0617883	494.307	0.987983
			13.9308	0.0618869	495.095	0.989559
			13.9349	0.0619782	495.825	0.991019
			13.939	0.0620626	496.501	0.992368
			13.9431	0.06214	497.12	0.993606
			13.9472	0.0622103	497.682	0.99473
			13.9513	0.0622736	498.189	0.995742
			13.9554	0.0623298	498.639	0.996642
			13.9595	0.0623791	499.033	0.99743
			13.9636	0.0624215	499.372	0.998108
			13.9677	0.0624571	499.656	0.998676
			13.9718	0.0624861	499.889	0.99914
			13.9759	0.0625088	500.071	0.999504
			13.98	0.0625253	500.203	0.999768
			13.9841	0.0625357	500.286	0.999934
			13.9882	0.0625399	500.319	1
			13.9922	0.0625379	500.303	0.999968
			13.9963	0.06253	500.24	0.999842
			14.0004	0.0625162	500.129	0.999621
			14.0045	0.0624965	499.972	0.999306
			14.0086	0.0624708	499.766	0.998896
			14.0127	0.0624387	499.51	0.998382
			14.0168	0.0624002	499.202	0.997767
			14.0209	0.0623554	498.843	0.997051
			14.025	0.0623044	498.435	0.996235
			14.0291	0.0622474	497.98	0.995324
			14.0332	0.0621845	497.476	0.994318
			14.0373	0.0621158	496.927	0.99322
			14.0414	0.0620414	496.332	0.99203
			14.0455	0.0619617	495.693	0.990755
			14.0496	0.0618768	495.015	0.989398
			14.0537	0.061787	494.296	0.987962
			14.0578	0.0616921	493.537	0.986445
			14.0619	0.0615922	492.738	0.984847
			14.066	0.0614878	491.902	0.983177
			14.0701	0.061379	491.032	0.981438
			14.0741	0.0612654	490.124	0.979622
			14.0782	0.0611468	489.174	0.977725
			14.0823	0.0610233	488.186	0.97575
			14.0864	0.060895	487.16	0.973699
			14.0905	0.0607616	486.093	0.971566
			14.0946	0.0606229	484.983	0.969348
			14.0987	0.060479	483.832	0.967047
			14.1028	0.0603299	482.64	0.964664
			14.1069	0.0601762	481.41	0.962206
			14.111	0.0600183	480.146	0.959681
			14.1151	0.0598561	478.848	0.957086
			14.1192	0.0596898	477.518	0.954428
			14.1233	0.0595199	476.159	0.951711
			14.1274	0.0593465	474.772	0.948939
			14.1315	0.0591699	473.359	0.946115
			14.1356	0.05899	471.92	0.943238
			14.1397	0.0588065	470.452	0.940304
			14.1438	0.0586193	468.954	0.937311
			14.1479	0.0584284	467.427	0.934259
			14.152	0.0582339	465.871	0.931149
			14.156	0.0580358	464.286	0.92798
			14.1601	0.0578338	462.671	0.924751
			14.1642	0.0576281	461.025	0.921462
			14.1683	0.0574187	459.349	0.918113
			14.1724	0.0572059	457.647	0.91471
			14.1765	0.0569897	455.918	0.911254
			14.1806	0.0567704	454.163	0.907747
			14.1847	0.0565478	452.382	0.904188
			14.1888	0.056322	450.576	0.900578
			14.1929	0.0560936	448.749	0.896926
			14.197	0.0558625	446.9	0.893231
			14.2011	0.0556289	445.031	0.889494
			14.2052	0.0553928	443.142	0.88572
			14.2093	0.0551545	441.236	0.881909
			14.2134	0.0549141	439.313	0.878066
			14.2175	0.0546718	437.374	0.874191
			14.2216	0.0544271	435.417	0.870278
			14.2257	0.05418	433.44	0.866328
			14.2298	0.0539309	431.447	0.862345
			14.2338	0.0536795	429.436	0.858324
			14.2379	0.0534255	427.404	0.854263
			14.242	0.053169	425.352	0.850163
			14.2461	0.0529104	423.283	0.846027
			14.2502	0.0526497	421.198	0.841859
			14.2543	0.0523874	419.099	0.837664
			14.2584	0.0521236	416.989	0.833446
			14.2625	0.0518581	414.865	0.8292
			14.2666	0.051591	412.728	0.82493
			14.2707	0.0513228	410.582	0.820641
			14.2748	0.0510535	408.428	0.816335
			14.2789	0.0507832	406.266	0.812014
			14.283	0.0505122	404.097	0.807679
			14.2871	0.0502402	401.922	0.803331
			14.2912	0.0499673	399.738	0.798967
			14.2953	0.0496928	397.543	0.794579
			14.2994	0.0494169	395.335	0.790167
			14.3035	0.0491396	393.117	0.785732
			14.3076	0.0488606	390.885	0.781271
			14.3117	0.0485801	388.641	0.776786
			14.3157	0.0482986	386.389	0.772285
			14.3198	0.0480163	384.13	0.767771
			14.3239	0.0477332	381.866	0.763244
			14.328	0.0474496	379.597	0.75871
			14.3321	0.0471656	377.325	0.754168
			14.3362	0.0468814	375.051	0.749624
			14.3403	0.0465971	372.777	0.745079
			14.3444	0.0463126	370.501	0.740529
			14.3485	0.046028	368.224	0.735979
			14.3526	0.0457435	365.948	0.731429
			14.3567	0.0454591	363.673	0.726882
			14.3608	0.0451744	361.395	0.72233
			14.3649	0.0448896	359.117	0.717775
			14.369	0.0446045	356.836	0.713217
			14.3731	0.044319	354.552	0.708651
			14.3772	0.044033	352.264	0.70408
			14.3813	0.0437468	349.974	0.699502
			14.3854	0.0434603	347.682	0.694921
			14.3895	0.0431734	345.387	0.690334
			14.3935	0.0428861	343.089	0.68574
			14.3976	0.0425988	340.791	0.681147
			14.4017	0.042312	338.496	0.676561
			14.4058	0.0420256	336.205	0.671982
			14.4099	0.0417397	333.918	0.66741
			14.414	0.0414544	331.635	0.662848
			14.4181	0.0411697	329.358	0.658296
			14.4222	0.0408855	327.084	0.653752
			14.4263	0.0406017	324.814	0.649214
			14.4304	0.0403187	322.55	0.644689
			14.4345	0.0400367	320.293	0.640178
			14.4386	0.0397553	318.043	0.63568
			14.4427	0.0394746	315.797	0.631191
			14.4468	0.0391943	313.554	0.626709
			14.4509	0.0389143	311.315	0.622232
			14.455	0.0386347	309.077	0.617761
			14.4591	0.0383556	306.845	0.613298
			14.4632	0.0380771	304.617	0.608845
			14.4673	0.0377992	302.393	0.604401
			14.4714	0.0375221	300.177	0.59997
			14.4754	0.0372459	297.967	0.595555
			14.4795	0.0369707	295.766	0.591155
			14.4836	0.0366967	293.574	0.586774
			14.4877	0.0364239	291.391	0.582411
			14.4918	0.0361522	289.218	0.578067
			14.4959	0.0358818	287.055	0.573743
			14.5	0.0356126	284.9	0.569438
			14.5041	0.0353441	282.753	0.565145
			14.5082	0.0350764	280.611	0.560864
			14.5123	0.0348094	278.475	0.556595
			14.5164	0.0345429	276.343	0.552334
			14.5205	0.0342773	274.218	0.548087
			14.5246	0.0340127	272.101	0.543856
			14.5287	0.0337492	269.993	0.539642
			14.5328	0.0334869	267.895	0.535449
			14.5369	0.0332259	265.808	0.531276
			14.541	0.0329661	263.729	0.527122
			14.5451	0.0327074	261.659	0.522985
			14.5492	0.0324499	259.599	0.518868
			14.5532	0.0321937	257.549	0.51477
			14.5573	0.0319388	255.51	0.510695
			14.5614	0.0316854	253.483	0.506643
			14.5655	0.0314336	251.469	0.502617
			14.5696	0.0311832	249.466	0.498613
			14.5737	0.0309341	247.473	0.49463
			14.5778	0.030686	245.488	0.490663
			14.5819	0.0304389	243.511	0.486711
			14.586	0.030193	241.544	0.48278
			14.5901	0.0299482	239.586	0.478866
			14.5942	0.0297047	237.637	0.474972
			14.5983	0.0294623	235.699	0.471097
			14.6024	0.0292214	233.771	0.467244
			14.6065	0.0289819	231.855	0.463415
			14.6106	0.0287441	229.952	0.459612
			14.6147	0.0285076	228.06	0.45583
			14.6188	0.0282725	226.18	0.452071
			14.6229	0.0280389	224.311	0.448337
			14.627	0.027807	222.456	0.444628
			14.6311	0.0275769	220.615	0.440948
			14.6351	0.0273483	218.787	0.437294
			14.6392	0.0271213	216.971	0.433665
			14.6433	0.0268958	215.166	0.430058
			14.6474	0.0266717	213.374	0.426475
			14.6515	0.0264492	211.593	0.422917
			14.6556	0.0262281	209.825	0.419383
			14.6597	0.0260083	208.066	0.415867
			14.6638	0.0257892	206.314	0.412365
			14.6679	0.0255712	204.569	0.408878
			14.672	0.0253544	202.835	0.405411
			14.6761	0.0251389	201.111	0.401966
			14.6802	0.0249248	199.398	0.398543
			14.6843	0.0247121	197.697	0.395141
			14.6884	0.024501	196.008	0.391766
			14.6925	0.0242917	194.334	0.388419
			14.6966	0.024084	192.672	0.385098
			14.7007	0.0238779	191.023	0.381803
			14.7048	0.0236731	189.385	0.378528
			14.7089	0.0234694	187.755	0.375271
			14.713	0.0232673	186.138	0.372039
			14.717	0.0230668	184.534	0.368833
			14.7211	0.0228676	182.941	0.365648
			14.7252	0.0226696	181.357	0.362483
			14.7293	0.0224729	179.783	0.359338
			14.7334	0.0222776	178.221	0.356214
			14.7375	0.0220836	176.669	0.353113
			14.7416	0.0218913	175.131	0.350038
			14.7457	0.0217005	173.604	0.346987
			14.7498	0.021511	172.088	0.343956
			14.7539	0.0213227	170.581	0.340945
			14.758	0.0211356	169.085	0.337955
			14.7621	0.02095	167.6	0.334987
			14.7662	0.0207657	166.126	0.33204
			14.7703	0.0205828	164.663	0.329115
			14.7744	0.0204014	163.211	0.326214
			14.7785	0.0202215	161.772	0.323338
			14.7826	0.0200431	160.344	0.320484
			14.7867	0.0198659	158.927	0.317652
			14.7908	0.0196899	157.519	0.314838
			14.7948	0.0195153	156.122	0.312045
			14.7989	0.0193419	154.735	0.309273
			14.803	0.0191698	153.359	0.306522
			14.8071	0.018999	151.992	0.30379
			14.8112	0.0188292	150.634	0.301075
			14.8153	0.0186606	149.285	0.29838
			14.8194	0.0184934	147.947	0.295705
			14.8235	0.0183274	146.619	0.293051
			14.8276	0.0181627	145.301	0.290417
			14.8317	0.017999	143.992	0.2878
			14.8358	0.0178365	142.692	0.285202
			14.8399	0.0176752	141.402	0.282624
			14.844	0.0175153	140.122	0.280066
			14.8481	0.0173567	138.853	0.27753
			14.8522	0.0171994	137.595	0.275015
			14.8563	0.0170433	136.346	0.272519
			14.8604	0.0168886	135.108	0.270045
			14.8645	0.0167352	133.881	0.267592
			14.8686	0.0165827	132.661	0.265153
			14.8727	0.0164312	131.449	0.262731
			14.8767	0.016281	130.248	0.26033
			14.8808	0.0161321	129.057	0.257949
			14.8849	0.0159843	127.874	0.255585
			14.889	0.0158375	126.7	0.253239
			14.8931	0.0156918	125.535	0.250909
			14.8972	0.0155471	124.377	0.248595
			14.9013	0.0154036	123.228	0.2463
			14.9054	0.0152614	122.091	0.244027
			14.9095	0.0151205	120.964	0.241774
			14.9136	0.0149808	119.847	0.239541
			14.9177	0.0148426	118.741	0.23733
			14.9218	0.0147056	117.645	0.23514
			14.9259	0.0145697	116.558	0.232967
			14.93	0.0144346	115.477	0.230806
			14.9341	0.0143004	114.403	0.228661
			14.9382	0.0141673	113.339	0.226533
			14.9423	0.0140352	112.282	0.22442
			14.9464	0.0139041	111.232	0.222323
			14.9505	0.0137738	110.19	0.22024
			14.9545	0.0136443	109.155	0.21817
			14.9586	0.0135161	108.128	0.216119
			14.9627	0.0133888	107.111	0.214085
			14.9668	0.0132625	106.1	0.212065
			14.9709	0.0131371	105.097	0.21006
			14.975	0.0130125	104.1	0.208067
			14.9791	0.0128889	103.111	0.20609
			14.9832	0.0127666	102.133	0.204135
			14.9873	0.0126455	101.164	0.2022
			14.9914	0.0125255	100.204	0.20028
			14.9955	0.0124066	99.2527	0.198379
			14.9996	0.0122886	98.309	0.196493
			15.0037	0.0121717	97.3732	0.194622
			15.0078	0.0120556	96.4451	0.192767
			15.0119	0.0119403	95.5227	0.190924
			15.016	0.0118258	94.6062	0.189092
			15.0201	0.011712	93.6956	0.187272
			15.0242	0.0115991	92.7924	0.185467
			15.0283	0.0114872	91.8977	0.183678
			15.0324	0.0113766	91.0128	0.18191
			15.0364	0.011267	90.1363	0.180158
			15.0405	0.0111584	89.2674	0.178421
			15.0446	0.011051	88.4081	0.176703
			15.0487	0.0109447	87.558	0.175004
			15.0528	0.0108395	86.7158	0.173321
			15.0569	0.0107351	85.881	0.171652
			15.061	0.0106316	85.053	0.169998
			15.0651	0.010529	84.2323	0.168357
			15.0692	0.0104276	83.4211	0.166736
			15.0733	0.0103273	82.6185	0.165132
			15.0774	0.0102278	81.822	0.16354
			15.0815	0.0101288	81.0308	0.161958
			15.0856	0.0100306	80.2445	0.160387
			15.0897	0.00993309	79.4647	0.158828
			15.0938	0.0098365	78.692	0.157284
			15.0979	0.00974063	77.9251	0.155751
			15.102	0.00964566	77.1653	0.154232
			15.1061	0.00955188	76.415	0.152733
			15.1102	0.00945925	75.674	0.151252
			15.1143	0.00936761	74.9409	0.149786
			15.1183	0.00927683	74.2146	0.148335
			15.1224	0.00918708	73.4966	0.1469
			15.1265	0.00909851	72.7881	0.145483
			15.1306	0.00901091	72.0873	0.144083
			15.1347	0.00892417	71.3934	0.142696
			15.1388	0.00883839	70.7071	0.141324
			15.1429	0.00875348	70.0279	0.139966
			15.147	0.00866927	69.3542	0.13862
			15.1511	0.00858575	68.686	0.137285
			15.1552	0.00850305	68.0244	0.135962
			15.1593	0.0084211	67.3688	0.134652
			15.1634	0.00833995	66.7196	0.133354
			15.1675	0.0082596	66.0768	0.132069
			15.1716	0.00818001	65.4401	0.130797
			15.1757	0.00810129	64.8103	0.129538
			15.1798	0.00802328	64.1862	0.128291
			15.1839	0.00794599	63.5679	0.127055
			15.188	0.00786975	62.958	0.125836
			15.1921	0.00779441	62.3553	0.124631
			15.1961	0.00771975	61.758	0.123437
			15.2002	0.00764585	61.1668	0.122256
			15.2043	0.00757285	60.5828	0.121088
			15.2084	0.00750057	60.0045	0.119933
			15.2125	0.00742888	59.431	0.118786
			15.2166	0.00735788	58.863	0.117651
			15.2207	0.00728753	58.3002	0.116526
			15.2248	0.00721786	57.7429	0.115412
			15.2289	0.00714884	57.1907	0.114308
			15.233	0.00708046	56.6437	0.113215
			15.2371	0.00701287	56.103	0.112134
			15.2412	0.00694605	55.5684	0.111066
			15.2453	0.00687997	55.0398	0.110009
			15.2494	0.00681465	54.5172	0.108965
			15.2535	0.00674999	53.9999	0.107931
			15.2576	0.00668607	53.4885	0.106909
			15.2617	0.00662311	52.9849	0.105902
			15.2658	0.00656094	52.4875	0.104908
			15.2699	0.00649911	51.9929	0.10392
			15.274	0.00643771	51.5017	0.102938
			15.278	0.00637707	51.0166	0.101968
			15.2821	0.00631727	50.5382	0.101012
			15.2862	0.00625807	50.0645	0.100065
			15.2903	0.00619932	49.5945	0.0991259
			15.2944	0.00614127	49.1301	0.0981976
			15.2985	0.00608406	48.6725	0.097283
			15.3026	0.0060275	48.22	0.0963785
			15.3067	0.00597138	47.7711	0.0954812
			15.3108	0.00591596	47.3277	0.094595
			15.3149	0.00586136	46.8909	0.093722
			15.319	0.00580726	46.4581	0.0928569
			15.3231	0.00575378	46.0302	0.0920018
			15.3272	0.00570109	45.6087	0.0911593
			15.3313	0.00564882	45.1905	0.0903235
			15.3354	0.00559715	44.7772	0.0894973
			15.3395	0.00554633	44.3707	0.0886848
			15.3436	0.0054959	43.9672	0.0878783
			15.3477	0.00544601	43.5681	0.0870806
			15.3518	0.00539707	43.1766	0.0862981
			15.3558	0.00534871	42.7897	0.0855249
			15.3599	0.0053008	42.4064	0.0847587
			15.364	0.00525334	42.0267	0.0839998
			15.3681	0.00520645	41.6516	0.0832501
			15.3722	0.00516032	41.2826	0.0825126
			15.3763	0.00511464	40.9171	0.0817821
			15.3804	0.00506937	40.5549	0.0810582
			15.3845	0.0050246	40.1968	0.0803423
			15.3886	0.00498042	39.8434	0.079636
			15.3927	0.00493685	39.4948	0.0789393
			15.3968	0.00489371	39.1496	0.0782494
			15.4009	0.00485107	38.8086	0.0775677
			15.405	0.00480889	38.4711	0.0768932
			15.4091	0.0047673	38.1384	0.0762281
			15.4132	0.00472623	37.8099	0.0755715
			15.4173	0.00468568	37.4854	0.0749231
			15.4214	0.00464561	37.1648	0.0742823
			15.4255	0.00460603	36.8483	0.0736495
			15.4296	0.00456686	36.5349	0.0730232
			15.4337	0.00452806	36.2245	0.0724028
			15.4377	0.0044898	35.9184	0.0717911
			15.4418	0.00445213	35.617	0.0711886
			15.4459	0.00441487	35.319	0.0705929
			15.45	0.00437802	35.0242	0.0700037
			15.4541	0.00434161	34.7329	0.0694214
			15.4582	0.00430574	34.4459	0.0688479
			15.4623	0.00427044	34.1635	0.0682835
			15.4664	0.00423552	33.8841	0.0677251
			15.4705	0.0042011	33.6088	0.0671748
			15.4746	0.00416711	33.3369	0.0666313
			15.4787	0.00413358	33.0686	0.0660951
			15.4828	0.00410018	32.8015	0.0655611
			15.4869	0.00406723	32.5379	0.0650343
			15.491	0.00403483	32.2787	0.0645162
			15.4951	0.00400285	32.0228	0.0640048
			15.4992	0.00397138	31.7711	0.0635017
			15.5033	0.00394003	31.5203	0.0630004
			15.5074	0.00390905	31.2724	0.062505
			15.5115	0.00387834	31.0267	0.0620139
			15.5155	0.00384807	30.7846	0.0615299
			15.5196	0.00381844	30.5475	0.0610561
			15.5237	0.00378881	30.3104	0.0605823
			15.5278	0.00375959	30.0767	0.0601151
			15.5319	0.00373079	29.8463	0.0596546
			15.536	0.00370219	29.6175	0.0591972
			15.5401	0.00367428	29.3943	0.0587511
			15.5442	0.00364668	29.1734	0.0583097
			15.5483	0.00361926	28.9541	0.0578712
			15.5524	0.00359247	28.7398	0.0574429
			15.5565	0.00356585	28.5268	0.0570173
			15.5606	0.00353942	28.3153	0.0565945
			15.5647	0.00351369	28.1095	0.0561832
			15.5688	0.00348817	27.9053	0.0557751
			15.5729	0.00346274	27.7019	0.0553685
			15.577	0.0034381	27.5048	0.0549745
			15.5811	0.00341385	27.3108	0.0545868
			15.5852	0.00338944	27.1155	0.0541965
			15.5893	0.00336565	26.9252	0.0538161
			15.5934	0.00334246	26.7396	0.0534452
			15.5974	0.00331882	26.5506	0.0530673
			15.6015	0.00329551	26.3641	0.0526946
			15.6056	0.0032732	26.1856	0.0523378
			15.6097	0.003251	26.008	0.0519828
			15.6138	0.00322865	25.8292	0.0516255
			15.6179	0.00320695	25.6556	0.0512785
			15.622	0.00318569	25.4855	0.0509385
			15.6261	0.00316388	25.3111	0.0505899
			15.6302	0.00314223	25.1379	0.0502437
			15.6343	0.0031216	24.9728	0.0499138
			15.6384	0.00310128	24.8102	0.0495888
			15.6425	0.00308054	24.6443	0.0492572
			15.6466	0.00306005	24.4804	0.0489297
			15.6507	0.00304029	24.3223	0.0486136
			15.6548	0.00302064	24.1651	0.0482995
			15.6589	0.0030007	24.0056	0.0479806
			15.663	0.00298139	23.8511	0.0476718
			15.6671	0.00296298	23.7038	0.0473774
			15.6712	0.00294462	23.5569	0.0470838
			15.6753	0.00292572	23.4058	0.0467817
			15.6793	0.00290711	23.2569	0.0464841
			15.6834	0.00288953	23.1162	0.046203
			15.6875	0.00287221	22.9777	0.0459261
			15.6916	0.00285416	22.8333	0.0456375
			15.6957	0.00283609	22.6888	0.0453486
			15.6998	0.00281882	22.5506	0.0450724
			15.7039	0.00280211	22.4168	0.0448051
			15.708	0.00278538	22.283	0.0445376
			15.7121	0.00276822	22.1458	0.0442633
			15.7162	0.00275143	22.0114	0.0439948
			15.7203	0.0027353	21.8824	0.0437369
			15.7244	0.00271968	21.7574	0.0434871
			15.7285	0.00270388	21.6311	0.0432346
			15.7326	0.0026877	21.5016	0.0429757
			15.7367	0.00267201	21.3761	0.042725
			15.7408	0.00265711	21.2569	0.0424867
			15.7449	0.00264289	21.1431	0.0422593
			15.749	0.0026286	21.0288	0.0420307
			15.7531	0.0026135	20.908	0.0417893
			15.7571	0.00259847	20.7877	0.0415489
			15.7612	0.00258417	20.6734	0.0413204
			15.7653	0.0025704	20.5632	0.0411002
			15.7694	0.00255698	20.4558	0.0408856
			15.7735	0.00254323	20.3459	0.0406658
			15.7776	0.00252902	20.2321	0.0404385
			15.7817	0.00251529	20.1223	0.040219
			15.7858	0.00250228	20.0183	0.040011
			15.7899	0.00248987	19.9189	0.0398125
			15.794	0.00247734	19.8187	0.0396122
			15.7981	0.00246387	19.711	0.0393968
			15.8022	0.00245032	19.6026	0.0391802
			15.8063	0.00243756	19.5005	0.0389761
			15.8104	0.00242538	19.403	0.0387813
			15.8145	0.00241351	19.3081	0.0385916
			15.8186	0.00240178	19.2143	0.038404
			15.8227	0.00238955	19.1164	0.0382084
			15.8268	0.00237684	19.0147	0.0380052
			15.8309	0.00236465	18.9172	0.0378103
			15.835	0.00235315	18.8252	0.0376263
			15.839	0.00234224	18.7379	0.037452
			15.8431	0.00233184	18.6547	0.0372857
			15.8472	0.00232122	18.5697	0.0371158
			15.8513	0.00230949	18.4759	0.0369283
			15.8554	0.00229757	18.3806	0.0367377
			15.8595	0.00228639	18.2911	0.0365589
			15.8636	0.00227585	18.2068	0.0363904
			15.8677	0.00226575	18.126	0.0362289
			15.8718	0.00225579	18.0463	0.0360697
			15.8759	0.00224579	17.9663	0.0359097
			15.88	0.0022351	17.8808	0.0357388
			15.8841	0.00222392	17.7914	0.0355601
			15.8882	0.0022133	17.7064	0.0353903
			15.8923	0.00220328	17.6262	0.03523
			15.8964	0.00219384	17.5508	0.0350791
			15.9005	0.00218479	17.4784	0.0349344
			15.9046	0.00217588	17.407	0.0347919
			15.9087	0.00216694	17.3355	0.0346489
			15.9128	0.00215733	17.2587	0.0344954
			15.9168	0.00214713	17.177	0.0343321
			15.9209	0.00213733	17.0987	0.0341755
			15.925	0.00212811	17.0249	0.034028
			15.9291	0.00211945	16.9556	0.0338896
			15.9332	0.00211129	16.8903	0.0337592
			15.9373	0.00210333	16.8266	0.0336318
			15.9414	0.00209516	16.7613	0.0335012
			15.9455	0.00208634	16.6908	0.0333602
			15.9496	0.0020768	16.6144	0.0332076
			15.9537	0.00206751	16.5401	0.0330591
			15.9578	0.00205873	16.4699	0.0329188
			15.9619	0.00205046	16.4036	0.0327864
			15.966	0.00204265	16.3412	0.0326616
			15.9701	0.00203531	16.2825	0.0325442
			15.9742	0.00202829	16.2263	0.032432
			15.9783	0.00202143	16.1714	0.0323222
			15.9824	0.00201459	16.1167	0.0322129
			15.9865	0.00200711	16.0569	0.0320933
			15.9906	0.00199873	15.9898	0.0319592
			15.9947	0.00199039	15.9231	0.031826
			15.9987	0.00198253	15.8603	0.0317003
			16.0028	0.00197513	15.8011	0.031582
			16.0069	0.00196816	15.7452	0.0314704
			16.011	0.00196158	15.6926	0.0313652
			16.0151	0.00195527	15.6422	0.0312644
			16.0192	0.00194908	15.5926	0.0311654
			16.0233	0.00194289	15.5431	0.0310665
			16.0274	0.00193602	15.4882	0.0309566
			16.0315	0.00192817	15.4254	0.0308311
			16.0356	0.00192033	15.3626	0.0307056
			16.0397	0.00191291	15.3033	0.030587
			16.0438	0.0019059	15.2472	0.030475
			16.0479	0.00189931	15.1945	0.0303696
			16.052	0.00189311	15.1449	0.0302705
			16.0561	0.00188728	15.0982	0.0301772
			16.0602	0.00188177	15.0542	0.0300891
			16.0643	0.00187646	15.0117	0.0300042
			16.0684	0.00187116	14.9693	0.0299195
			16.0725	0.00186574	14.9259	0.0298328
			16.0766	0.00185954	14.8763	0.0297337
			16.0806	0.0018524	14.8192	0.0296195
			16.0847	0.00184531	14.7625	0.0295062
			16.0888	0.00183863	14.709	0.0293993
			16.0929	0.00183232	14.6586	0.0292985
			16.097	0.00182636	14.6109	0.0292031
			16.1011	0.00182073	14.5658	0.029113
			16.1052	0.00181544	14.5235	0.0290286
			16.1093	0.00181047	14.4838	0.0289491
			16.1134	0.00180579	14.4463	0.0288742
			16.1175	0.00180126	14.4101	0.0288018
			16.1216	0.00179673	14.3738	0.0287293
			16.1257	0.00179207	14.3366	0.0286549
			16.1298	0.00178664	14.2931	0.028568
			16.1339	0.00178021	14.2417	0.0284653
			16.138	0.00177379	14.1903	0.0283625
			16.1421	0.00176774	14.1419	0.0282658
			16.1462	0.00176202	14.0962	0.0281744
			16.1503	0.00175661	14.0529	0.0280879
			16.1544	0.00175148	14.0119	0.0280059
			16.1584	0.00174664	13.9731	0.0279284
			16.1625	0.00174206	13.9365	0.0278551
			16.1666	0.00173772	13.9018	0.0277858
			16.1707	0.00173364	13.8691	0.0277205
			16.1748	0.00172963	13.837	0.0276564
			16.1789	0.00172543	13.8034	0.0275893
			16.183	0.00172087	13.767	0.0275164
			16.1871	0.00171536	13.7229	0.0274282
			16.1912	0.00170911	13.6729	0.0273283
			16.1953	0.00170318	13.6254	0.0272335
			16.1994	0.00169754	13.5804	0.0271434
			16.2035	0.00169222	13.5378	0.0270583
			16.2076	0.00168722	13.4977	0.0269783
			16.2117	0.0016825	13.46	0.0269028
			16.2158	0.00167803	13.4243	0.0268314
			16.2199	0.0016738	13.3904	0.0267637
			16.224	0.00166977	13.3581	0.0266992
			16.2281	0.00166593	13.3275	0.026638
			16.2322	0.00166231	13.2985	0.0265801
			16.2363	0.00165892	13.2714	0.0265258
			16.2403	0.0016558	13.2464	0.0264758
			16.2444	0.00165276	13.2221	0.0264273
			16.2485	0.0016495	13.196	0.0263752
			16.2526	0.00164587	13.1669	0.0263171
			16.2567	0.00164121	13.1297	0.0262426
			16.2608	0.00163564	13.0851	0.0261535
			16.2649	0.00163027	13.0421	0.0260677
			16.269	0.00162522	13.0018	0.025987
			16.2731	0.00162049	12.9639	0.0259113
			16.2772	0.00161606	12.9285	0.0258405
			16.2813	0.0016119	12.8952	0.0257739
			16.2854	0.00160798	12.8638	0.0257113
			16.2895	0.00160429	12.8343	0.0256522
			16.2936	0.00160081	12.8065	0.0255966
			16.2977	0.00159753	12.7803	0.0255442
			16.3018	0.00159445	12.7556	0.0254949
			16.3059	0.00159154	12.7323	0.0254483
			16.31	0.00158878	12.7103	0.0254043
			16.3141	0.00158617	12.6894	0.0253626
			16.3181	0.0015837	12.6696	0.025323
			16.3222	0.00158129	12.6504	0.0252846
			16.3263	0.00157887	12.631	0.0252459
			16.3304	0.00157578	12.6063	0.0251965
			16.3345	0.00157124	12.5699	0.0251238
			16.3386	0.00156606	12.5285	0.025041
			16.3427	0.00156114	12.4892	0.0249624
			16.3468	0.00155653	12.4522	0.0248885
			16.3509	0.00155222	12.4177	0.0248197
			16.355	0.00154817	12.3853	0.0247549
			16.3591	0.00154436	12.3549	0.024694
			16.3632	0.00154077	12.3261	0.0246366
			16.3673	0.00153739	12.2991	0.0245825
			16.3714	0.00153419	12.2735	0.0245314
			16.3755	0.00153116	12.2493	0.024483
			16.3796	0.00152828	12.2262	0.0244369
			16.3837	0.00152555	12.2044	0.0243933
			16.3878	0.00152299	12.1839	0.0243522
			16.3919	0.00152057	12.1646	0.0243136
			16.396	0.00151829	12.1464	0.0242772
			16.4	0.00151615	12.1292	0.0242429
			16.4041	0.00151413	12.113	0.0242106
			16.4082	0.00151221	12.0977	0.0241799
			16.4123	0.00151037	12.0829	0.0241505
			16.4164	0.00150844	12.0675	0.0241196
			16.4205	0.00150625	12.05	0.0240846
			16.4246	0.00150364	12.0291	0.0240429
			16.4287	0.0015	12	0.0239847
			16.4328	0.00149547	11.9638	0.0239123
			16.4369	0.0014911	11.9288	0.0238424
			16.441	0.00148697	11.8958	0.0237764
			16.4451	0.00148306	11.8645	0.0237138
			16.4492	0.00147933	11.8347	0.0236543
			16.4533	0.00147587	11.807	0.0235989
			16.4574	0.00147267	11.7814	0.0235477
			16.4615	0.00146965	11.7572	0.0234994
			16.4656	0.0014668	11.7344	0.0234538
			16.4697	0.00146409	11.7127	0.0234105
			16.4738	0.0014615	11.692	0.0233691
			16.4778	0.00145907	11.6725	0.0233302
			16.4819	0.00145676	11.6541	0.0232934
			16.486	0.0014546	11.6368	0.0232588
			16.4901	0.00145259	11.6207	0.0232266
			16.4942	0.0014507	11.6056	0.0231964
			16.4983	0.00144891	11.5913	0.0231678
			16.5024	0.00144719	11.5775	0.0231403
			16.5065	0.00144551	11.5641	0.0231135
			16.5106	0.00144393	11.5514	0.0230881
			16.5147	0.00144245	11.5396	0.0230645
			16.5188	0.00144108	11.5286	0.0230425
			16.5229	0.0014398	11.5184	0.0230221
			16.527	0.00143862	11.509	0.0230033
			16.5311	0.00143736	11.4989	0.0229831
			16.5352	0.00143579	11.4863	0.022958
			16.5393	0.00143376	11.47	0.0229255
			16.5434	0.00143064	11.4451	0.0228757
			16.5475	0.00142656	11.4125	0.0228104
			16.5516	0.00142259	11.3808	0.022747
			16.5557	0.00141884	11.3507	0.0226869
			16.5597	0.0014153	11.3224	0.0226303
			16.5638	0.00141196	11.2956	0.0225769
			16.5679	0.00140882	11.2706	0.0225267
			16.572	0.00140588	11.2471	0.0224798
			16.5761	0.00140312	11.2249	0.0224356
			16.5802	0.00140051	11.204	0.0223938
			16.5843	0.00139803	11.1843	0.0223543
			16.5884	0.0013957	11.1656	0.0223169
			16.5925	0.00139349	11.1479	0.0222817
			16.5966	0.00139141	11.1313	0.0222483
			16.6007	0.00138943	11.1155	0.0222168
			16.6048	0.00138758	11.1006	0.0221871
			16.6089	0.00138586	11.0869	0.0221596
			16.613	0.00138426	11.074	0.022134
			16.6171	0.00138275	11.062	0.0221098
			16.6212	0.00138131	11.0505	0.0220869
			16.6253	0.00137996	11.0397	0.0220653
			16.6294	0.0013787	11.0296	0.0220452
			16.6335	0.00137752	11.0202	0.0220263
			16.6376	0.00137642	11.0113	0.0220086
			16.6416	0.00137538	11.003	0.021992
			16.6457	0.0013744	10.9952	0.0219764
			16.6498	0.00137349	10.9879	0.0219618
			16.6539	0.00137262	10.9809	0.0219479
			16.658	0.00137177	10.9742	0.0219343
			16.6621	0.00137098	10.9679	0.0219218
			16.6662	0.00137029	10.9623	0.0219106
			16.6703	0.00136953	10.9562	0.0218985
			16.6744	0.00136851	10.9481	0.0218821
			16.6785	0.00136711	10.9369	0.0218598
			16.6826	0.00136469	10.9175	0.0218212
			16.6867	0.00136117	10.8894	0.0217649
			16.6908	0.00135755	10.8604	0.0217069
			16.6949	0.0013541	10.8328	0.0216518
			16.699	0.00135086	10.8069	0.0216
			16.7031	0.00134782	10.7826	0.0215514
			16.7072	0.00134495	10.7596	0.0215055
			16.7113	0.00134222	10.7377	0.0214618
			16.7154	0.00133962	10.7169	0.0214202
			16.7194	0.00133715	10.6972	0.0213808
			16.7235	0.00133481	10.6785	0.0213433
			16.7276	0.00133257	10.6606	0.0213076
			16.7317	0.00133049	10.6439	0.0212743
			16.7358	0.00132861	10.6289	0.0212443
			16.7399	0.00132687	10.615	0.0212164
			16.744	0.00132523	10.6018	0.0211901
			16.7481	0.00132366	10.5893	0.0211651
			16.7522	0.00132218	10.5774	0.0211414
			16.7563	0.00132077	10.5662	0.0211189
			16.7604	0.00131945	10.5556	0.0210977
			16.7645	0.00131819	10.5455	0.0210776
			16.7686	0.001317	10.536	0.0210586
			16.7727	0.00131586	10.5268	0.0210403
			16.7768	0.00131474	10.5179	0.0210225
			16.7809	0.00131371	10.5097	0.0210059
			16.785	0.00131274	10.5019	0.0209904
			16.7891	0.00131183	10.4946	0.0209759
			16.7932	0.00131099	10.4879	0.0209624
			16.7973	0.00131021	10.4817	0.02095
			16.8013	0.0013095	10.476	0.0209387
			16.8054	0.00130884	10.4707	0.0209281
			16.8095	0.00130821	10.4657	0.0209181
			16.8136	0.00130763	10.461	0.0209087
			16.8177	0.00130708	10.4566	0.0208999
			16.8218	0.00130656	10.4525	0.0208917
			16.8259	0.00130607	10.4486	0.0208838
			16.83	0.00130561	10.4449	0.0208764
			16.8341	0.00130516	10.4413	0.0208692
			16.8382	0.00130473	10.4379	0.0208624
			16.8423	0.00130436	10.4349	0.0208565
			16.8464	0.00130403	10.4322	0.0208511
			16.8505	0.00130367	10.4294	0.0208455
			16.8546	0.00130325	10.426	0.0208387
			16.8587	0.00130271	10.4216	0.02083
			16.8628	0.00130135	10.4108	0.0208084
			16.8669	0.00129847	10.3878	0.0207623
			16.871	0.00129493	10.3595	0.0207057
			16.8751	0.0012916	10.3328	0.0206524
			16.8791	0.00128846	10.3077	0.0206022
			16.8832	0.0012855	10.284	0.0205549
			16.8873	0.0012827	10.2616	0.0205102
			16.8914	0.00128006	10.2405	0.0204679
			16.8955	0.00127756	10.2205	0.020428
			16.8996	0.0012752	10.2016	0.0203903
			16.9037	0.00127295	10.1836	0.0203543
			16.9078	0.00127084	10.1667	0.0203205
			16.9119	0.00126891	10.1513	0.0202896
			16.916	0.00126709	10.1368	0.0202606
			16.9201	0.00126538	10.1231	0.0202332
			16.9242	0.00126376	10.1101	0.0202073
			16.9283	0.00126224	10.0979	0.020183
			16.9324	0.00126083	10.0866	0.0201604
			16.9365	0.0012595	10.076	0.0201392
			16.9406	0.00125825	10.066	0.0201191
			16.9447	0.00125706	10.0565	0.0201001
			16.9488	0.00125592	10.0474	0.0200819
			16.9529	0.00125486	10.0389	0.0200649
			16.957	0.00125388	10.0311	0.0200493
			16.961	0.00125296	10.0237	0.0200346
			16.9651	0.00125208	10.0166	0.0200205
			16.9692	0.00125123	10.0098	0.0200069
			16.9733	0.0012504	10.0032	0.0199936
			16.9774	0.00124964	9.99714	0.0199815
			16.9815	0.00124898	9.9918	0.0199709
			16.9856	0.00124835	9.98684	0.0199609
			16.9897	0.00124777	9.98218	0.0199516
			16.9938	0.00124722	9.9778	0.0199429
			16.9979	0.0012467	9.97363	0.0199345
			17.002	0.0012462	9.96962	0.0199265
			17.0061	0.00124573	9.9658	0.0199189
			17.0102	0.00124526	9.96206	0.0199114
			17.0143	0.00124481	9.95852	0.0199043
			17.0184	0.00124442	9.95532	0.019898
			17.0225	0.00124404	9.95235	0.019892
			17.0266	0.0012437	9.94963	0.0198866
			17.0307	0.00124339	9.94714	0.0198816
			17.0348	0.0012431	9.94478	0.0198769
			17.0389	0.00124281	9.94252	0.0198724
			17.0429	0.00124313	9.94508	0.0198775
			17.047	0.00124505	9.96037	0.019908
			17.0511	0.00124799	9.98396	0.0199552
			17.0552	0.00125091	10.0073	0.0200019
			17.0593	0.00125375	10.03	0.0200473
			17.0634	0.00125644	10.0515	0.0200903
			17.0675	0.00125899	10.072	0.0201311
			17.0716	0.00126141	10.0913	0.0201697
			17.0757	0.00126369	10.1095	0.0202062
			17.0798	0.00126584	10.1267	0.0202405
			17.0839	0.00126788	10.143	0.0202731
			17.088	0.00126982	10.1585	0.0203041
			17.0921	0.00127165	10.1732	0.0203335
			17.0962	0.00127338	10.1871	0.0203612
			17.1003	0.00127501	10.2001	0.0203872
			17.1044	0.00127654	10.2123	0.0204116
			17.1085	0.00127797	10.2238	0.0204346
			17.1126	0.00127933	10.2346	0.0204562
			17.1167	0.00128082	10.2466	0.0204801
			17.1207	0.00128329	10.2663	0.0205196
			17.1248	0.00128693	10.2955	0.0205778
			17.1289	0.00129086	10.3268	0.0206405
			17.133	0.0012948	10.3584	0.0207036
			17.1371	0.00129867	10.3893	0.0207654
			17.1412	0.0013024	10.4192	0.0208251
			17.1453	0.00130591	10.4473	0.0208813
			17.1494	0.00130921	10.4737	0.020934
			17.1535	0.00131233	10.4987	0.0209839
			17.1576	0.00131604	10.5283	0.0210433
			17.1617	0.00132133	10.5706	0.0211277
			17.1658	0.00132737	10.619	0.0212245
			17.1699	0.0013331	10.6648	0.021316
			17.174	0.00133851	10.7081	0.0214025
			17.1781	0.00134361	10.7489	0.0214841
			17.1822	0.00134842	10.7874	0.021561
			17.1863	0.00135367	10.8293	0.0216449
			17.1904	0.00136038	10.8831	0.0217523
			17.1945	0.00136782	10.9425	0.0218711
			17.1986	0.00137489	10.9991	0.0219842
			17.2026	0.00138158	11.0527	0.0220912
			17.2067	0.0013886	11.1088	0.0222035
			17.2108	0.00139658	11.1726	0.022331
			17.2149	0.00140478	11.2383	0.0224622
			17.219	0.00141294	11.3036	0.0225927
			17.2231	0.00142136	11.3709	0.0227272
			17.2272	0.00143069	11.4455	0.0228765
			17.2313	0.00144084	11.5268	0.0230388
			17.2354	0.00145085	11.6068	0.0231989
			17.2395	0.00146091	11.6873	0.0233596
			17.2436	0.00147199	11.776	0.0235369
			17.2477	0.00148365	11.8692	0.0237232
			17.2518	0.0014951	11.9608	0.0239064
			17.2559	0.00150706	12.0565	0.0240976
			17.26	0.00151985	12.1588	0.0243021
			17.2641	0.00153289	12.2631	0.0245106
			17.2682	0.00154646	12.3716	0.0247275
			17.2723	0.00156071	12.4857	0.0249555
			17.2764	0.00157535	12.6028	0.0251895
			17.2804	0.0015908	12.7264	0.0254366
			17.2845	0.00160674	12.8539	0.0256915
			17.2886	0.0016229	12.9832	0.0259498
			17.2927	0.00163969	13.1175	0.0262183
			17.2968	0.00165694	13.2556	0.0264942
			17.3009	0.00167483	13.3986	0.0267802
			17.305	0.00169323	13.5458	0.0270744
			17.3091	0.00171204	13.6963	0.0273752
			17.3132	0.00173146	13.8517	0.0276857
			17.3173	0.00175143	14.0115	0.028005
			17.3214	0.0017722	14.1776	0.028337
			17.3255	0.00179376	14.3501	0.0286819
			17.3296	0.00181605	14.5284	0.0290383
			17.3337	0.00183929	14.7143	0.0294098
			17.3378	0.00186334	14.9067	0.0297945
			17.3419	0.00188824	15.1059	0.0301926
			17.346	0.00191397	15.3118	0.0306041
			17.3501	0.00194048	15.5238	0.0310279
			17.3542	0.00196811	15.7449	0.0314697
			17.3583	0.00199665	15.9732	0.031926
			17.3623	0.00202575	16.206	0.0323913
			17.3664	0.00205583	16.4466	0.0328723
			17.3705	0.00208717	16.6973	0.0333734
			17.3746	0.00211944	16.9556	0.0338895
			17.3787	0.00215246	17.2197	0.0344174
			17.3828	0.00218643	17.4915	0.0349606
			17.3869	0.00222164	17.7731	0.0355235
			17.391	0.00225821	18.0657	0.0361083
			17.3951	0.00229609	18.3687	0.036714
			17.3992	0.00233516	18.6813	0.0373388
			17.4033	0.00237552	19.0042	0.0379841
			17.4074	0.00241721	19.3377	0.0386507
			17.4115	0.00246026	19.6821	0.0393391
			17.4156	0.00250479	20.0384	0.0400512
			17.4197	0.00255073	20.4059	0.0407857
			17.4238	0.00259792	20.7834	0.0415403
			17.4279	0.00264639	21.1711	0.0423153
			17.432	0.00269638	21.5711	0.0431146
			17.4361	0.00274804	21.9843	0.0439407
			17.4401	0.00280144	22.4116	0.0447945
			17.4442	0.00285664	22.8531	0.045677
			17.4483	0.00291349	23.3079	0.0465861
			17.4524	0.00297194	23.7755	0.0475207
			17.4565	0.00303217	24.2573	0.0484838
			17.4606	0.00309438	24.7551	0.0494786
			17.4647	0.00315864	25.2692	0.0505061
			17.4688	0.00322515	25.8012	0.0515696
			17.4729	0.00329396	26.3517	0.0526698
			17.477	0.00336509	26.9207	0.0538071
			17.4811	0.00343863	27.509	0.0549829
			17.4852	0.00351447	28.1158	0.0561957
			17.4893	0.00359265	28.7412	0.0574457
			17.4934	0.00367296	29.3837	0.0587299
			17.4975	0.00375542	30.0434	0.0600485
			17.5016	0.00384056	30.7245	0.0614098
			17.5057	0.00392849	31.4279	0.0628158
			17.5098	0.00401917	32.1533	0.0642657
			17.5139	0.00411266	32.9013	0.0657606
			17.518	0.00420909	33.6727	0.0673025
			17.522	0.00430852	34.4681	0.0688923
			17.5261	0.00441097	35.2878	0.0705306
			17.5302	0.00451654	36.1323	0.0722186
			17.5343	0.00462524	37.0019	0.0739566
			17.5384	0.00473717	37.8974	0.0757464
			17.5425	0.0048527	38.8216	0.0775937
			17.5466	0.00497192	39.7754	0.0795
			17.5507	0.00509445	40.7556	0.0814592
			17.5548	0.00522039	41.7631	0.083473
			17.5589	0.00535005	42.8004	0.0855462
			17.563	0.00548344	43.8676	0.0876792
			17.5671	0.00562066	44.9653	0.0898732
			17.5712	0.00576147	46.0918	0.0921248
			17.5753	0.00590612	47.249	0.0944377
			17.5794	0.00605514	48.4412	0.0968206
			17.5835	0.00620845	49.6676	0.0992719
			17.5876	0.00636595	50.9276	0.10179
			17.5917	0.00652765	52.2212	0.104376
			17.5958	0.00669368	53.5494	0.107031
			17.5999	0.00686423	54.9139	0.109758
			17.6039	0.00703969	56.3175	0.112563
			17.608	0.00722026	57.7621	0.115451
			17.6121	0.00740578	59.2462	0.118417
			17.6162	0.00759629	60.7703	0.121463
			17.6203	0.00779188	62.3351	0.124591
			17.6244	0.00799275	63.942	0.127802
			17.6285	0.00819868	65.5894	0.131095
			17.6326	0.00840962	67.277	0.134468
			17.6367	0.00862592	69.0073	0.137927
			17.6408	0.00884734	70.7787	0.141467
			17.6449	0.00907364	72.5892	0.145086
			17.649	0.00930517	74.4413	0.148788
			17.6531	0.00954186	76.3349	0.152573
			17.6572	0.00978377	78.2701	0.156441
			17.6613	0.0100314	80.2512	0.1604
			17.6654	0.0102844	82.2754	0.164446
			17.6695	0.0105425	84.34	0.168572
			17.6736	0.0108063	86.4507	0.172791
			17.6777	0.0110759	88.6072	0.177101
			17.6817	0.0113507	90.8056	0.181496
			17.6858	0.0116311	93.0486	0.185979
			17.6899	0.0119171	95.3371	0.190553
			17.694	0.0122094	97.6749	0.195225
			17.6981	0.0125084	100.067	0.200007
			17.7022	0.0128136	102.509	0.204887
			17.7063	0.0131239	104.992	0.209849
			17.7104	0.0134396	107.517	0.214896
			17.7145	0.0137607	110.085	0.22003
			17.7186	0.0140869	112.695	0.225247
			17.7227	0.0144185	115.348	0.230548
			17.7268	0.0147554	118.043	0.235935
			17.7309	0.0150976	120.781	0.241408
			17.735	0.0154455	123.564	0.24697
			17.7391	0.015799	126.392	0.252622
			17.7432	0.016158	129.264	0.258364
			17.7473	0.0165225	132.18	0.264191
			17.7514	0.0168921	135.137	0.270102
			17.7555	0.0172672	138.138	0.2761
			17.7596	0.0176477	141.181	0.282183
			17.7636	0.0180334	144.267	0.28835
			17.7677	0.0184242	147.394	0.2946
			17.7718	0.0188196	150.557	0.300921
			17.7759	0.019219	153.752	0.307308
			17.78	0.0196228	156.982	0.313764
			17.7841	0.020031	160.248	0.320292
			17.7882	0.0204438	163.551	0.326893
			17.7923	0.0208607	166.885	0.333558
			17.7964	0.0212811	170.249	0.340281
			17.8005	0.021705	173.64	0.347059
			17.8046	0.0221321	177.057	0.353888
			17.8087	0.0225629	180.503	0.360776
			17.8128	0.0229974	183.979	0.367724
			17.8169	0.0234357	187.485	0.374732
			17.821	0.0238776	191.02	0.381797
			17.8251	0.0243228	194.583	0.388918
			17.8292	0.0247712	198.169	0.396086
			17.8333	0.025222	201.776	0.403294
			17.8374	0.0256751	205.401	0.41054
			17.8414	0.0261304	209.043	0.41782
			17.8455	0.0265875	212.7	0.425128
			17.8496	0.0270459	216.367	0.432458
			17.8537	0.0275055	220.044	0.439807
			17.8578	0.0279657	223.726	0.447166
			17.8619	0.0284264	227.411	0.454532
			17.866	0.0288878	231.102	0.46191
			17.8701	0.0293498	234.799	0.469298
			17.8742	0.0298121	238.497	0.476689
			17.8783	0.0302743	242.194	0.484079
			17.8824	0.0307368	245.895	0.491476
			17.8865	0.0311999	249.599	0.49888
			17.8906	0.031663	253.304	0.506286
			17.8947	0.0321258	257.006	0.513685
			17.8988	0.0325879	260.703	0.521074
			17.9029	0.0330493	264.394	0.528451
			17.907	0.0335096	268.077	0.535812
			17.9111	0.0339685	271.748	0.543149
			17.9152	0.0344255	275.404	0.550457
			17.9193	0.0348806	279.045	0.557735
			17.9233	0.0353333	282.667	0.564973
			17.9274	0.035783	286.264	0.572164
			17.9315	0.0362299	289.839	0.579309
			17.9356	0.0366747	293.398	0.586421
			17.9397	0.037117	296.936	0.593493
			17.9438	0.0375561	300.449	0.600515
			17.9479	0.0379919	303.935	0.607483
			17.952	0.0384239	307.391	0.61439
			17.9561	0.0388516	310.813	0.621229
			17.9602	0.0392761	314.209	0.628017
			17.9643	0.0396975	317.58	0.634756
			17.9684	0.0401149	320.919	0.641429
			17.9725	0.0405281	324.225	0.648036
			17.9766	0.040937	327.496	0.654574
			17.9807	0.0413411	330.729	0.661036
			17.9848	0.0417403	333.923	0.66742
			17.9889	0.0421347	337.077	0.673725
			17.993	0.0425238	340.191	0.679948
			17.9971	0.0429074	343.259	0.686081
			18.0011	0.0432854	346.283	0.692124
			18.0052	0.0436577	349.262	0.698078
			18.0093	0.0440246	352.196	0.703944
			18.0134	0.0443857	355.086	0.709719
			18.0175	0.0447412	357.93	0.715404
			18.0216	0.045091	360.728	0.720996
			18.0257	0.0454349	363.479	0.726494
			18.0298	0.0457729	366.183	0.731899
			18.0339	0.0461053	368.843	0.737215
			18.038	0.0464321	371.457	0.74244
			18.0421	0.0467529	374.024	0.74757
			18.0462	0.047068	376.544	0.752608
			18.0503	0.0473769	379.015	0.757547
			18.0544	0.0476792	381.434	0.762382
			18.0585	0.047975	383.8	0.76711
			18.0626	0.0482638	386.111	0.771729
			18.0667	0.0485458	388.366	0.776238
			18.0708	0.0488211	390.569	0.78064
			18.0749	0.0490895	392.716	0.784931
			18.079	0.0493507	394.806	0.789109
			18.083	0.0496052	396.841	0.793177
			18.0871	0.0498529	398.823	0.797138
			18.0912	0.0500938	400.75	0.800989
			18.0953	0.0503277	402.621	0.804729
			18.0994	0.0505549	404.439	0.808363
			18.1035	0.0507755	406.204	0.81189
			18.1076	0.0509894	407.915	0.815311
			18.1117	0.0511967	409.574	0.818625
			18.1158	0.0513971	411.177	0.82183
			18.1199	0.0515906	412.725	0.824924
			18.124	0.0517774	414.219	0.82791
			18.1281	0.0519573	415.658	0.830786
			18.1322	0.0521303	417.043	0.833554
			18.1363	0.0522966	418.373	0.836212
			18.1404	0.0524558	419.646	0.838758
			18.1445	0.0526079	420.863	0.841189
			18.1486	0.0527531	422.025	0.843512
			18.1527	0.0528914	423.131	0.845723
			18.1568	0.0530223	424.178	0.847816
			18.1609	0.0531459	425.168	0.849793
			18.1649	0.0532628	426.102	0.851661
			18.169	0.053373	426.984	0.853424
			18.1731	0.0534771	427.817	0.855088
			18.1772	0.0535752	428.602	0.856657
			18.1813	0.0536676	429.341	0.858134
			18.1854	0.0537541	430.033	0.859518
			18.1895	0.0538347	430.678	0.860806
			18.1936	0.0539091	431.273	0.861995
			18.1977	0.0539775	431.82	0.86309
			18.2018	0.0540399	432.319	0.864087
			18.2059	0.0540961	432.768	0.864985
			18.21	0.0541461	433.169	0.865786
			18.2141	0.0541903	433.523	0.866492
			18.2182	0.0542285	433.828	0.867104
			18.2223	0.0542609	434.087	0.867621
			18.2264	0.0542876	434.301	0.868048
			18.2305	0.0543085	434.468	0.868382
			18.2346	0.0543236	434.589	0.868624
			18.2387	0.054333	434.664	0.868774
			18.2427	0.0543369	434.695	0.868836
			18.2468	0.0543354	434.683	0.868812
			18.2509	0.0543287	434.629	0.868704
			18.255	0.0543169	434.535	0.868517
			18.2591	0.0543002	434.401	0.868249
			18.2632	0.0542784	434.227	0.8679
			18.2673	0.0542516	434.013	0.867472
			18.2714	0.0542199	433.759	0.866966
			18.2755	0.0541836	433.469	0.866385
			18.2796	0.0541424	433.14	0.865727
			18.2837	0.0540964	432.771	0.864991
			18.2878	0.0540457	432.366	0.86418
			18.2919	0.0539904	431.923	0.863295
			18.296	0.0539301	431.441	0.862332
			18.3001	0.0538651	430.92	0.861292
			18.3042	0.0537951	430.361	0.860172
			18.3083	0.0537202	429.762	0.858976
			18.3124	0.053641	429.128	0.857709
			18.3165	0.0535575	428.46	0.856373
			18.3206	0.0534695	427.756	0.854967
			18.3246	0.0533775	427.02	0.853495
			18.3287	0.0532815	426.252	0.851961
			18.3328	0.0531818	425.455	0.850367
			18.3369	0.0530785	424.628	0.848715
			18.341	0.0529714	423.771	0.847002
			18.3451	0.0528609	422.887	0.845235
			18.3492	0.0527472	421.977	0.843417
			18.3533	0.0526302	421.042	0.841547
			18.3574	0.0525099	420.079	0.839623
			18.3615	0.0523858	419.087	0.837639
			18.3656	0.0522579	418.063	0.835594
			18.3697	0.0521265	417.012	0.833492
			18.3738	0.0519915	415.932	0.831333
			18.3779	0.0518531	414.825	0.82912
			18.382	0.0517117	413.694	0.82686
			18.3861	0.0515672	412.538	0.82455
			18.3902	0.0514193	411.355	0.822185
			18.3943	0.0512683	410.146	0.819769
			18.3984	0.0511145	408.916	0.81731
			18.4024	0.0509578	407.662	0.814805
			18.4065	0.0507985	406.388	0.812257
			18.4106	0.0506366	405.093	0.809669
			18.4147	0.0504721	403.777	0.807039
			18.4188	0.0503054	402.443	0.804373
			18.4229	0.0501361	401.089	0.801667
			18.427	0.0499644	399.715	0.79892
			18.4311	0.0497901	398.321	0.796134
			18.4352	0.0496133	396.907	0.793307
			18.4393	0.0494339	395.471	0.790438
			18.4434	0.0492519	394.015	0.787528
			18.4475	0.0490673	392.538	0.784576
			18.4516	0.0488802	391.041	0.781584
			18.4557	0.0486907	389.525	0.778554
			18.4598	0.0484989	387.991	0.775487
			18.4639	0.0483049	386.439	0.772386
			18.468	0.048109	384.872	0.769254
			18.4721	0.0479113	383.291	0.766093
			18.4762	0.0477116	381.693	0.762899
			18.4803	0.0475098	380.079	0.759673
			18.4843	0.0473065	378.452	0.756421
			18.4884	0.0471017	376.813	0.753146
			18.4925	0.0468954	375.163	0.749848
			18.4966	0.0466877	373.501	0.746526
			18.5007	0.0464786	371.829	0.743184
			18.5048	0.0462682	370.145	0.739819
			18.5089	0.046056	368.448	0.736426
			18.513	0.0458418	366.735	0.733002
			18.5171	0.0456255	365.004	0.729542
			18.5212	0.0454071	363.257	0.72605
			18.5253	0.0451872	361.498	0.722535
			18.5294	0.0449658	359.726	0.718994
			18.5335	0.0447428	357.942	0.715428
			18.5376	0.0445187	356.15	0.711846
			18.5417	0.0442938	354.351	0.70825
			18.5458	0.0440679	352.543	0.704637
			18.5499	0.0438408	350.726	0.701006
			18.554	0.0436129	348.904	0.697362
			18.5581	0.0433849	347.079	0.693715
			18.5622	0.0431564	345.251	0.690062
			18.5662	0.0429271	343.417	0.686395
			18.5703	0.0426969	341.575	0.682715
			18.5744	0.0424658	339.727	0.67902
			18.5785	0.0422336	337.869	0.675307
			18.5826	0.042	336	0.671571
			18.5867	0.0417649	334.119	0.667813
			18.5908	0.0415287	332.23	0.664036
			18.5949	0.0412916	330.333	0.660245
			18.599	0.0410538	328.43	0.656442
			18.6031	0.0408152	326.522	0.652627
			18.6072	0.040576	324.608	0.648802
			18.6113	0.0403362	322.689	0.644967
			18.6154	0.0400959	320.768	0.641126
			18.6195	0.0398554	318.843	0.63728
			18.6236	0.039615	316.92	0.633436
			18.6277	0.0393748	314.999	0.629596
			18.6318	0.0391347	313.078	0.625756
			18.6359	0.0388948	311.159	0.621921
			18.64	0.0386549	309.239	0.618083
			18.644	0.0384145	307.316	0.614241
			18.6481	0.0381739	305.391	0.610393
			18.6522	0.0379325	303.46	0.606534
			18.6563	0.0376905	301.524	0.602664
			18.6604	0.0374482	299.585	0.598789
			18.6645	0.0372055	297.644	0.594908
			18.6686	0.0369622	295.698	0.591018
			18.6727	0.0367185	293.748	0.587121
			18.6768	0.0364745	291.796	0.583221
			18.6809	0.0362308	289.846	0.579323
			18.685	0.0359874	287.899	0.575432
			18.6891	0.0357445	285.956	0.571547
			18.6932	0.035502	284.016	0.567669
			18.6973	0.0352598	282.078	0.563797
			18.7014	0.0350181	280.145	0.559933
			18.7055	0.034777	278.216	0.556078
			18.7096	0.0345363	276.29	0.552228
			18.7137	0.0342956	274.364	0.548379
			18.7178	0.0340549	272.439	0.544531
			18.7219	0.0338147	270.518	0.540691
			18.7259	0.0335749	268.599	0.536856
			18.73	0.0333354	266.683	0.533027
			18.7341	0.0330963	264.771	0.529204
			18.7382	0.0328577	262.861	0.525387
			18.7423	0.0326193	260.954	0.521576
			18.7464	0.0323812	259.049	0.517769
			18.7505	0.0321435	257.148	0.513968
			18.7546	0.0319064	255.251	0.510177
			18.7587	0.03167	253.36	0.506396
			18.7628	0.0314341	251.473	0.502625
			18.7669	0.031199	249.592	0.498865
			18.771	0.0309649	247.719	0.495123
			18.7751	0.0307319	245.856	0.491398
			18.7792	0.0304995	243.996	0.487681
			18.7833	0.0302675	242.14	0.483971
			18.7874	0.0300363	240.29	0.480274
			18.7915	0.0298059	238.447	0.47659
			18.7956	0.0295761	236.609	0.472916
			18.7997	0.0293471	234.777	0.469254
			18.8037	0.0291189	232.951	0.465605
			18.8078	0.0288913	231.131	0.461967
			18.8119	0.0286642	229.314	0.458335
			18.816	0.0284379	227.503	0.454717
			18.8201	0.0282126	225.701	0.451114
			18.8242	0.0279884	223.907	0.447529
			18.8283	0.0277653	222.122	0.443962
			18.8324	0.0275433	220.346	0.440412
			18.8365	0.0273227	218.581	0.436884
			18.8406	0.0271032	216.826	0.433375
			18.8447	0.0268849	215.079	0.429884
			18.8488	0.0266675	213.34	0.426408
			18.8529	0.0264513	211.611	0.422951
			18.857	0.0262365	209.892	0.419516
			18.8611	0.026023	208.184	0.416102
			18.8652	0.0258103	206.482	0.412702
			18.8693	0.0255978	204.782	0.409303
			18.8734	0.0253857	203.086	0.405912
			18.8775	0.0251747	201.398	0.402538
			18.8816	0.0249648	199.718	0.399182
			18.8856	0.0247559	198.047	0.395842
			18.8897	0.024548	196.384	0.392517
			18.8938	0.0243409	194.727	0.389205
			18.8979	0.0241348	193.078	0.38591
			18.902	0.0239302	191.441	0.382639
			18.9061	0.0237271	189.817	0.379391
			18.9102	0.0235254	188.204	0.376167
			18.9143	0.0233253	186.602	0.372967
			18.9184	0.0231267	185.013	0.369791
			18.9225	0.0229291	183.433	0.366632
			18.9266	0.0227326	181.861	0.36349
			18.9307	0.0225371	180.297	0.360364
			18.9348	0.0223426	178.741	0.357254
			18.9389	0.022149	177.192	0.354159
			18.943	0.0219564	175.651	0.351078
			18.9471	0.0217648	174.119	0.348015
			18.9512	0.0215743	172.594	0.344969
			18.9553	0.0213848	171.078	0.341939
			18.9594	0.0211965	169.572	0.338929
			18.9634	0.0210095	168.076	0.335938
			18.9675	0.0208237	166.59	0.332967
			18.9716	0.0206394	165.115	0.330019
			18.9757	0.0204564	163.651	0.327093
			18.9798	0.0202747	162.198	0.324189
			18.9839	0.0200943	160.754	0.321303
			18.988	0.0199152	159.322	0.31844
			18.9921	0.0197376	157.9	0.3156
			18.9962	0.019561	156.488	0.312777
			19.0003	0.0193858	155.086	0.309975
			19.0044	0.0192117	153.694	0.307191
			19.0085	0.0190389	152.311	0.304428
			19.0126	0.0188674	150.939	0.301686
			19.0167	0.0186968	149.575	0.298959
			19.0208	0.0185271	148.217	0.296245
			19.0249	0.0183586	146.868	0.29355
			19.029	0.0181909	145.527	0.290869
			19.0331	0.0180242	144.194	0.288204
			19.0372	0.017859	142.872	0.285562
			19.0413	0.0176949	141.56	0.282939
			19.0453	0.0175319	140.255	0.280332
			19.0494	0.0173704	138.963	0.277749
			19.0535	0.0172103	137.682	0.275189
			19.0576	0.0170515	136.412	0.272649
			19.0617	0.0168939	135.151	0.27013
			19.0658	0.0167375	133.9	0.267629
			19.0699	0.0165824	132.659	0.265149
			19.074	0.0164284	131.428	0.262688
			19.0781	0.0162756	130.205	0.260244
			19.0822	0.0161237	128.99	0.257815
			19.0863	0.0159726	127.781	0.255399
			19.0904	0.0158226	126.581	0.253
			19.0945	0.0156737	125.39	0.25062
			19.0986	0.015526	124.208	0.248258
			19.1027	0.0153794	123.035	0.245913
			19.1068	0.0152339	121.871	0.243587
			19.1109	0.0150899	120.719	0.241284
			19.115	0.0149473	119.578	0.239005
			19.1191	0.014806	118.448	0.236745
			19.1232	0.0146658	117.327	0.234504
			19.1272	0.0145267	116.213	0.232279
			19.1313	0.0143885	115.108	0.230069
			19.1354	0.0142516	114.013	0.22788
			19.1395	0.0141159	112.927	0.22571
			19.1436	0.0139813	111.85	0.223558
			19.1477	0.0138478	110.782	0.221423
			19.1518	0.0137151	109.721	0.219301
			19.1559	0.0135833	108.666	0.217194
			19.16	0.0134523	107.618	0.215099
			19.1641	0.0133221	106.577	0.213018
			19.1682	0.013193	105.544	0.210954
			19.1723	0.013065	104.52	0.208907
			19.1764	0.0129381	103.505	0.206878
[truncated: 445 more rows]

## Sheet: Figure 4 FS 2A
hL1ORF1p(DD)-NTR(H6)			volume	OD280	OD280	OD280		volume	MW
			(ml)	relative		normalized		(ml)	kDa
Injection volume	100 µl
Superdex 200			11.003	0.000493603	3.94882	0.00811903		17.9024	6.00628
			11.0071	0.000493453	3.94762	0.00811656		17.9065	6.0158
			11.0112	0.000493306	3.94645	0.00811415		17.9106	6.02574
			11.0153	0.00049316	3.94528	0.00811175		17.9147	6.03701
			11.0194	0.000493014	3.94411	0.00810933		17.9188	6.05213
			11.0234	0.000492864	3.94292	0.00810688		17.9229	6.06334
			11.0275	0.000492709	3.94167	0.00810433		17.927	6.07279
			11.0316	0.000492545	3.94036	0.00810163		17.9311	6.08423
			11.0357	0.000492382	3.93906	0.00809895		17.9352	6.09585
			11.0398	0.000492269	3.93815	0.00809709		17.9393	6.10705
			11.0439	0.000492173	3.93738	0.0080955		17.9434	6.1193
			11.048	0.000492075	3.9366	0.0080939		17.9475	6.13472
			11.0521	0.000491979	3.93583	0.00809232		17.9516	6.15039
			11.0562	0.000491888	3.9351	0.00809082		17.9557	6.16195
			11.0603	0.000491791	3.93433	0.00808923		17.9598	6.17401
			11.0644	0.000491689	3.93351	0.00808754		17.9639	6.18538
			11.0685	0.000491566	3.93253	0.00808552		17.968	6.19691
			11.0726	0.000491414	3.93131	0.00808301		17.9721	6.20648
			11.0767	0.000491272	3.93018	0.00808069		17.9762	6.2178
			11.0808	0.000491104	3.92883	0.00807792		17.9802	6.22816
			11.0849	0.000490721	3.92577	0.00807163		17.9843	6.23899
			11.089	0.000490084	3.92067	0.00806114		17.9884	6.253
			11.0931	0.000489142	3.91313	0.00804565		17.9925	6.26435
			11.0972	0.000488445	3.90756	0.00803419		17.9966	6.27526
			11.1013	0.000488416	3.90732	0.0080337		18.0007	6.28533
			11.1053	0.000488409	3.90728	0.0080336		18.0048	6.29542
			11.1094	0.000488436	3.90749	0.00803405		18.0089	6.30534
			11.1135	0.000488469	3.90775	0.00803459		18.013	6.31416
			11.1176	0.00048848	3.90784	0.00803477		18.0171	6.32448
			11.1217	0.000488399	3.90719	0.00803343		18.0212	6.33554
			11.1258	0.000487685	3.90148	0.00802169		18.0253	6.34457
			11.1299	0.000485445	3.88356	0.00798485		18.0294	6.35522
			11.134	0.000482304	3.85844	0.00793318		18.0335	6.36408
			11.1381	0.000479277	3.83421	0.00788338		18.0376	6.37293
			11.1422	0.000476392	3.81114	0.00783593		18.0417	6.38204
			11.1463	0.00047373	3.78984	0.00779215		18.0458	6.39273
			11.1504	0.000471397	3.77118	0.00775377		18.0499	6.40243
			11.1545	0.000469177	3.75341	0.00771725		18.054	6.41167
			11.1586	0.000467021	3.73617	0.00768179		18.0581	6.42159
			11.1627	0.00046517	3.72136	0.00765134		18.0621	6.43097
			11.1668	0.000464893	3.71915	0.00764679		18.0662	6.43881
			11.1709	0.000465907	3.72726	0.00766347		18.0703	6.44592
			11.175	0.000467002	3.73602	0.00768149		18.0744	6.45386
			11.1791	0.000468004	3.74403	0.00769797		18.0785	6.46271
			11.1831	0.000468712	3.7497	0.00770961		18.0826	6.47138
			11.1872	0.000469086	3.75269	0.00771575		18.0867	6.48074
			11.1913	0.000468686	3.74949	0.00770919		18.0908	6.48955
			11.1954	0.000466872	3.73497	0.00767934		18.0949	6.49845
			11.1995	0.000464601	3.71681	0.00764199		18.099	6.50664
			11.2036	0.000462462	3.6997	0.00760681		18.1031	6.5146
			11.2077	0.000460432	3.68346	0.00757342		18.1072	6.52279
			11.2118	0.000458501	3.66801	0.00754166		18.1113	6.53069
			11.2159	0.000456663	3.6533	0.00751142		18.1154	6.53939
			11.22	0.000454911	3.63929	0.00748261		18.1195	6.54775
			11.2241	0.000453243	3.62594	0.00745516		18.1236	6.55596
			11.2282	0.000451655	3.61324	0.00742905		18.1277	6.564
			11.2323	0.00045016	3.60128	0.00740445		18.1318	6.57156
			11.2364	0.000448832	3.59066	0.00738262		18.1359	6.57915
			11.2405	0.000448179	3.58543	0.00737187		18.14	6.58726
			11.2446	0.000448967	3.59174	0.00738484		18.144	6.59586
			11.2487	0.000450233	3.60186	0.00740565		18.1481	6.60481
			11.2528	0.000451402	3.61121	0.00742488		18.1522	6.6119
			11.2569	0.0004524	3.6192	0.0074413		18.1563	6.61887
			11.261	0.000452689	3.62151	0.00744605		18.1604	6.62632
			11.265	0.000451593	3.61274	0.00742803		18.1645	6.63348
			11.2691	0.000450078	3.60063	0.00740311		18.1686	6.64038
			11.2732	0.00044856	3.58848	0.00737814		18.1727	6.64761
			11.2773	0.000446934	3.57547	0.0073514		18.1768	6.65471
			11.2814	0.000445439	3.56351	0.0073268		18.1809	6.66147
			11.2855	0.000444207	3.55366	0.00730654		18.185	6.66817
			11.2896	0.00044309	3.54472	0.00728817		18.1891	6.675
			11.2937	0.000442097	3.53677	0.00727183		18.1932	6.68208
			11.2978	0.000441073	3.52858	0.00725499		18.1973	6.68904
			11.3019	0.00044004	3.52032	0.007238		18.2014	6.69527
			11.306	0.000439063	3.51251	0.00722193		18.2055	6.70177
			11.3101	0.000438134	3.50507	0.00720665		18.2096	6.70807
			11.3142	0.000437261	3.49809	0.00719229		18.2137	6.71464
			11.3183	0.000436589	3.49271	0.00718123		18.2178	6.72169
			11.3224	0.000436359	3.49087	0.00717745		18.2218	6.7283
			11.3265	0.000436074	3.48859	0.00717276		18.2259	6.73469
			11.3306	0.000435522	3.48418	0.00716368		18.23	6.74041
			11.3347	0.000434776	3.47821	0.00715142		18.2341	6.74621
			11.3388	0.000434045	3.47236	0.0071394		18.2382	6.75247
			11.3428	0.000433346	3.46677	0.00712789		18.2423	6.75894
			11.3469	0.000432672	3.46138	0.0071168		18.2464	6.76532
			11.351	0.00043202	3.45616	0.00710608		18.2505	6.77162
			11.3551	0.000431384	3.45107	0.00709561		18.2546	6.77819
			11.3592	0.000430758	3.44606	0.00708532		18.2587	6.78445
			11.3633	0.000430134	3.44107	0.00707506		18.2628	6.79023
			11.3674	0.000429536	3.43629	0.00706522		18.2669	6.79639
			11.3715	0.000428987	3.4319	0.0070562		18.271	6.80284
			11.3756	0.00042846	3.42768	0.00704753		18.2751	6.80892
			11.3797	0.00042795	3.4236	0.00703913		18.2792	6.81508
			11.3838	0.000427455	3.41964	0.007031		18.2833	6.82141
			11.3879	0.000427006	3.41605	0.00702361		18.2874	6.82759
			11.392	0.00042658	3.41264	0.0070166		18.2915	6.8335
			11.3961	0.000426174	3.40939	0.00700993		18.2956	6.83931
			11.4002	0.000425785	3.40628	0.00700352		18.2997	6.8443
			11.4043	0.000425408	3.40326	0.00699732		18.3037	6.84869
			11.4084	0.000425044	3.40035	0.00699133		18.3078	6.85393
			11.4125	0.0004247	3.3976	0.00698568		18.3119	6.86024
			11.4166	0.000424378	3.39502	0.00698038		18.316	6.86633
			11.4207	0.000424067	3.39254	0.00697527		18.3201	6.87197
			11.4247	0.000423765	3.39012	0.0069703		18.3242	6.87821
			11.4288	0.000423458	3.38766	0.00696525		18.3283	6.8843
			11.4329	0.000423113	3.38491	0.00695958		18.3324	6.89004
			11.437	0.000422773	3.38218	0.00695398		18.3365	6.89534
			11.4411	0.000422429	3.37943	0.00694832		18.3406	6.90125
			11.4452	0.000422098	3.37679	0.00694288		18.3447	6.90732
			11.4493	0.000421815	3.37452	0.00693823		18.3488	6.91273
			11.4534	0.000421579	3.37263	0.00693435		18.3529	6.91865
			11.4575	0.000421365	3.37092	0.00693083		18.357	6.92468
			11.4616	0.000421155	3.36924	0.00692737		18.3611	6.93042
			11.4657	0.000420946	3.36756	0.00692392		18.3652	6.93579
			11.4698	0.000420737	3.3659	0.00692049		18.3693	6.94108
			11.4739	0.000420549	3.3644	0.00691741		18.3734	6.94635
			11.478	0.000420362	3.3629	0.00691433		18.3775	6.95126
			11.4821	0.000420172	3.36138	0.00691121		18.3815	6.95737
			11.4862	0.00041997	3.35976	0.00690787		18.3856	6.96393
			11.4903	0.00041977	3.35816	0.00690458		18.3897	6.97056
			11.4944	0.000419631	3.35705	0.0069023		18.3938	6.97773
			11.4985	0.000419497	3.35597	0.00690009		18.3979	6.9836
			11.5026	0.000419361	3.35489	0.00689785		18.402	6.98936
			11.5066	0.000419218	3.35375	0.00689551		18.4061	6.99376
			11.5107	0.000419065	3.35252	0.00689298		18.4102	6.99904
			11.5148	0.000418927	3.35142	0.00689072		18.4143	7.00485
			11.5189	0.000418794	3.35035	0.00688853		18.4184	7.01001
			11.523	0.000418658	3.34926	0.00688629		18.4225	7.01542
			11.5271	0.000418524	3.34819	0.00688409		18.4266	7.02114
			11.5312	0.00041844	3.34752	0.00688271		18.4307	7.02665
			11.5353	0.000418468	3.34774	0.00688317		18.4348	7.03235
			11.5394	0.000418471	3.34777	0.00688322		18.4389	7.03761
			11.5435	0.000418362	3.34689	0.00688142		18.443	7.04219
			11.5476	0.000418168	3.34534	0.00687823		18.4471	7.0461
			11.5517	0.000417967	3.34374	0.00687493		18.4512	7.05189
			11.5558	0.000417764	3.34211	0.00687159		18.4553	7.05804
			11.5599	0.000417561	3.34049	0.00686825		18.4594	7.06267
			11.564	0.000417379	3.33903	0.00686526		18.4634	7.06882
			11.5681	0.000417217	3.33773	0.00686259		18.4675	7.07185
			11.5722	0.000417066	3.33652	0.0068601		18.4716	7.0768
			11.5763	0.000416919	3.33536	0.0068577		18.4757	7.08216
			11.5804	0.000416775	3.3342	0.00685532		18.4798	7.08675
			11.5844	0.000416631	3.33305	0.00685295		18.4839	7.09003
			11.5885	0.000416475	3.3318	0.00685038		18.488	7.09271
			11.5926	0.000416278	3.33023	0.00684715		18.4921	7.09631
			11.5967	0.000416089	3.32871	0.00684404		18.4962	7.10044
			11.6008	0.000415936	3.32749	0.00684152		18.5003	7.10429
			11.6049	0.000415796	3.32637	0.00683922		18.5044	7.10938
			11.609	0.000415682	3.32546	0.00683735		18.5085	7.11422
			11.6131	0.000415591	3.32473	0.00683584		18.5126	7.11842
			11.6172	0.000415498	3.32399	0.00683433		18.5167	7.12122
			11.6213	0.000415403	3.32322	0.00683275		18.5208	7.12653
			11.6254	0.000415299	3.32239	0.00683105		18.5249	7.13014
			11.6295	0.000415178	3.32142	0.00682905		18.529	7.13321
			11.6336	0.000415053	3.32043	0.006827		18.5331	7.13661
			11.6377	0.000414924	3.31939	0.00682488		18.5372	7.1399
			11.6418	0.000414782	3.31825	0.00682253		18.5412	7.1431
			11.6459	0.000414627	3.31702	0.00682		18.5453	7.14392
			11.65	0.000414468	3.31575	0.00681738		18.5494	7.14385
			11.6541	0.000414317	3.31454	0.0068149		18.5535	7.14606
			11.6582	0.000414178	3.31342	0.0068126		18.5576	7.14962
			11.6623	0.000414043	3.31234	0.00681038		18.5617	7.15248
			11.6663	0.000413912	3.31129	0.00680823		18.5658	7.15471
			11.6704	0.000413781	3.31025	0.00680608		18.5699	7.15924
			11.6745	0.000413648	3.30918	0.00680389		18.574	7.16353
			11.6786	0.000413514	3.30811	0.00680169		18.5781	7.16654
			11.6827	0.000413386	3.30709	0.00679958		18.5822	7.17032
			11.6868	0.000413256	3.30605	0.00679744		18.5863	7.17057
			11.6909	0.000413116	3.30493	0.00679514		18.5904	7.17227
			11.695	0.000412966	3.30373	0.00679268		18.5945	7.17654
			11.6991	0.000412814	3.30251	0.00679018		18.5986	7.18201
			11.7032	0.00041268	3.30144	0.00678797		18.6027	7.18558
			11.7073	0.000412548	3.30038	0.00678579		18.6068	7.18898
			11.7114	0.000412403	3.29922	0.0067834		18.6109	7.19252
			11.7155	0.000412243	3.29795	0.00678078		18.615	7.19562
			11.7196	0.000412066	3.29652	0.00677786		18.6191	7.19949
			11.7237	0.000411882	3.29506	0.00677484		18.6231	7.20319
			11.7278	0.000411689	3.29351	0.00677167		18.6272	7.20588
			11.7319	0.000411473	3.29178	0.00676811		18.6313	7.2113
			11.736	0.000411245	3.28996	0.00676436		18.6354	7.21372
			11.7401	0.000411065	3.28852	0.00676139		18.6395	7.21803
			11.7441	0.000410898	3.28718	0.00675865		18.6436	7.22355
			11.7482	0.000410741	3.28593	0.00675607		18.6477	7.22889
			11.7523	0.000410595	3.28476	0.00675366		18.6518	7.23307
			11.7564	0.000410478	3.28382	0.00675174		18.6559	7.23708
			11.7605	0.000410368	3.28295	0.00674994		18.66	7.23979
			11.7646	0.00041025	3.282	0.006748		18.6641	7.24334
			11.7687	0.000410127	3.28101	0.00674597		18.6682	7.24778
			11.7728	0.000410003	3.28002	0.00674393		18.6723	7.25091
			11.7769	0.000409873	3.27898	0.0067418		18.6764	7.25417
			11.781	0.000409733	3.27786	0.00673949		18.6805	7.25792
			11.7851	0.000409575	3.2766	0.0067369		18.6846	7.25943
			11.7892	0.000409422	3.27537	0.00673437		18.6887	7.26303
			11.7933	0.00040927	3.27416	0.00673188		18.6928	7.26681
			11.7974	0.000409108	3.27286	0.00672921		18.6969	7.27081
			11.8015	0.000408901	3.27121	0.00672581		18.701	7.27224
			11.8056	0.00040869	3.26952	0.00672233		18.705	7.27644
			11.8097	0.000408528	3.26822	0.00671967		18.7091	7.28059
			11.8138	0.000408371	3.26697	0.00671709		18.7132	7.28151
			11.8179	0.000408218	3.26574	0.00671457		18.7173	7.28342
			11.822	0.000408068	3.26454	0.0067121		18.7214	7.28492
			11.826	0.000407923	3.26338	0.00670972		18.7255	7.28639
			11.8301	0.000407778	3.26222	0.00670734		18.7296	7.29018
			11.8342	0.000407625	3.261	0.00670481		18.7337	7.292
			11.8383	0.000407449	3.25959	0.00670192		18.7378	7.28935
			11.8424	0.000407301	3.2584	0.00669948		18.7419	7.28802
			11.8465	0.000407201	3.25761	0.00669785		18.746	7.291
			11.8506	0.000407102	3.25681	0.00669621		18.7501	7.29294
			11.8547	0.000407002	3.25601	0.00669456		18.7542	7.29272
			11.8588	0.000406899	3.2552	0.00669289		18.7583	7.29505
			11.8629	0.000406795	3.25436	0.00669116		18.7624	7.29757
			11.867	0.000406684	3.25347	0.00668934		18.7665	7.30063
			11.8711	0.000406543	3.25235	0.00668703		18.7706	7.29566
			11.8752	0.000406325	3.2506	0.00668344		18.7747	7.29383
			11.8793	0.000406116	3.24893	0.00668		18.7788	7.29569
			11.8834	0.000405914	3.24731	0.00667668		18.7828	7.29591
			11.8875	0.000405716	3.24573	0.00667341		18.7869	7.29715
			11.8916	0.000405519	3.24415	0.00667017		18.791	7.29901
			11.8957	0.000405316	3.24253	0.00666684		18.7951	7.29854
			11.8998	0.000405115	3.24092	0.00666354		18.7992	7.29353
			11.9038	0.00040491	3.23928	0.00666015		18.8033	7.2865
			11.9079	0.000404685	3.23748	0.00665646		18.8074	7.28339
			11.912	0.00040449	3.23592	0.00665325		18.8115	7.28331
			11.9161	0.000404359	3.23488	0.0066511		18.8156	7.2832
			11.9202	0.000404237	3.23389	0.00664909		18.8197	7.27821
			11.9243	0.000404111	3.23289	0.00664702		18.8238	7.27926
			11.9284	0.000403974	3.23179	0.00664477		18.8279	7.28067
			11.9325	0.00040381	3.23048	0.00664207		18.832	7.2788
			11.9366	0.000403657	3.22926	0.00663956		18.8361	7.28049
			11.9407	0.000403517	3.22814	0.00663725		18.8402	7.28239
			11.9448	0.000403392	3.22714	0.00663519		18.8443	7.28279
			11.9489	0.000403306	3.22645	0.00663378		18.8484	7.2794
			11.953	0.000403222	3.22577	0.00663239		18.8525	7.27768
			11.9571	0.00040314	3.22512	0.00663104		18.8566	7.27858
			11.9612	0.000403065	3.22452	0.00662981		18.8607	7.27798
			11.9653	0.000402991	3.22392	0.00662859		18.8647	7.27754
			11.9694	0.000402912	3.2233	0.0066273		18.8688	7.27987
			11.9735	0.000402828	3.22262	0.00662591		18.8729	7.28029
			11.9776	0.000402734	3.22187	0.00662437		18.877	7.28291
			11.9817	0.000402661	3.22129	0.00662317		18.8811	7.28433
			11.9857	0.000402632	3.22105	0.00662268		18.8852	7.28636
			11.9898	0.000402592	3.22074	0.00662204		18.8893	7.28723
			11.9939	0.000402541	3.22033	0.0066212		18.8934	7.28792
			11.998	0.00040247	3.21976	0.00662003		18.8975	7.28813
			12.0021	0.00040237	3.21896	0.00661838		18.9016	7.28776
			12.0062	0.00040225	3.218	0.0066164		18.9057	7.28963
			12.0103	0.00040211	3.21688	0.0066141		18.9098	7.29163
			12.0144	0.000401945	3.21556	0.00661139		18.9139	7.2924
			12.0185	0.000401792	3.21434	0.00660887		18.918	7.25003
			12.0226	0.000401667	3.21334	0.00660682
			12.0267	0.000401542	3.21234	0.00660477
			12.0308	0.000401416	3.21133	0.00660269
			12.0349	0.000401293	3.21035	0.00660067
			12.039	0.000401188	3.2095	0.00659894
			12.0431	0.000401082	3.20866	0.0065972
			12.0472	0.000400975	3.2078	0.00659544
			12.0513	0.000400873	3.20699	0.00659376
			12.0554	0.000400794	3.20635	0.00659246
			12.0595	0.000400713	3.20571	0.00659113
			12.0636	0.000400631	3.20505	0.00658978
			12.0676	0.000400546	3.20437	0.00658839
			12.0717	0.000400458	3.20367	0.00658694
			12.0758	0.000400365	3.20292	0.0065854
			12.0799	0.000400247	3.20198	0.00658346
			12.084	0.00040008	3.20064	0.00658071
			12.0881	0.000399909	3.19928	0.00657791
			12.0922	0.000399747	3.19798	0.00657524
			12.0963	0.000399578	3.19663	0.00657246
			12.1004	0.000399402	3.19522	0.00656956
			12.1045	0.000399217	3.19373	0.00656652
			12.1086	0.000399024	3.19219	0.00656335
			12.1127	0.000398836	3.19069	0.00656025
			12.1168	0.000398667	3.18934	0.00655748
			12.1209	0.000398518	3.18815	0.00655503
			12.125	0.000398398	3.18718	0.00655304
			12.1291	0.000398318	3.18655	0.00655174
			12.1332	0.00039823	3.18584	0.00655029
			12.1373	0.000398132	3.18505	0.00654867
			12.1414	0.000398022	3.18417	0.00654686
			12.1454	0.000397913	3.18331	0.00654508
			12.1495	0.000397797	3.18238	0.00654317
			12.1536	0.000397676	3.18141	0.00654118
			12.1577	0.000397558	3.18046	0.00653923
			12.1618	0.000397435	3.17948	0.00653721
			12.1659	0.000397294	3.17835	0.00653489
			12.17	0.000397137	3.17709	0.0065323
			12.1741	0.000396972	3.17578	0.0065296
			12.1782	0.000396808	3.17447	0.0065269
			12.1823	0.000396662	3.1733	0.0065245
			12.1864	0.000396526	3.1722	0.00652225
			12.1905	0.0003964	3.1712	0.00652018
			12.1946	0.000396285	3.17028	0.0065183
			12.1987	0.000396169	3.16935	0.00651638
			12.2028	0.000396049	3.1684	0.00651442
			12.2069	0.000395927	3.16741	0.0065124
			12.211	0.000395818	3.16654	0.00651061
			12.2151	0.000395718	3.16574	0.00650896
			12.2192	0.000395613	3.1649	0.00650724
			12.2233	0.000395493	3.16394	0.00650526
			12.2273	0.000395364	3.16291	0.00650314
			12.2314	0.000395246	3.16197	0.0065012
			12.2355	0.000395127	3.16102	0.00649925
			12.2396	0.000395006	3.16005	0.00649726
			12.2437	0.000394883	3.15907	0.00649524
			12.2478	0.00039476	3.15808	0.00649322
			12.2519	0.000394633	3.15706	0.00649112
			12.256	0.000394499	3.156	0.00648892
			12.2601	0.000394363	3.1549	0.00648668
			12.2642	0.000394239	3.15391	0.00648464
			12.2683	0.000394119	3.15295	0.00648266
			12.2724	0.000394005	3.15204	0.00648079
			12.2765	0.000393905	3.15124	0.00647914
			12.2806	0.000393805	3.15044	0.0064775
			12.2847	0.000393689	3.14951	0.00647559
			12.2888	0.000393553	3.14842	0.00647335
			12.2929	0.000393387	3.14709	0.00647062
			12.297	0.000393226	3.14581	0.00646797
			12.3011	0.000393111	3.14489	0.00646609
			12.3051	0.000393014	3.14411	0.00646448
			12.3092	0.000392919	3.14335	0.00646292
			12.3133	0.000392829	3.14263	0.00646145
			12.3174	0.000392749	3.14199	0.00646013
			12.3215	0.000392667	3.14133	0.00645877
			12.3256	0.000392578	3.14062	0.00645731
			12.3297	0.000392466	3.13973	0.00645548
			12.3338	0.00039233	3.13864	0.00645323
			12.3379	0.000392197	3.13758	0.00645105
			12.342	0.000392063	3.13651	0.00644885
			12.3461	0.00039192	3.13536	0.00644649
			12.3502	0.000391749	3.13399	0.00644369
			12.3543	0.000391585	3.13268	0.00644099
			12.3584	0.000391427	3.13142	0.00643839
			12.3625	0.000391289	3.13031	0.00643611
			12.3666	0.00039117	3.12936	0.00643416
			12.3707	0.000391052	3.12841	0.00643221
			12.3748	0.000390923	3.12739	0.0064301
			12.3789	0.00039079	3.12632	0.00642791
			12.383	0.000390668	3.12535	0.00642591
			12.387	0.000390564	3.12451	0.0064242
			12.3911	0.000390473	3.12378	0.00642269
			12.3952	0.000390378	3.12303	0.00642114
			12.3993	0.000390279	3.12223	0.00641951
			12.4034	0.00039017	3.12136	0.0064177
			12.4075	0.000390053	3.12042	0.00641579
			12.4116	0.000389926	3.11941	0.0064137
			12.4157	0.000389781	3.11825	0.00641131
			12.4198	0.000389639	3.11711	0.00640898
			12.4239	0.000389492	3.11594	0.00640656
			12.428	0.000389338	3.1147	0.00640402
			12.4321	0.000389166	3.11333	0.00640119
			12.4362	0.000388981	3.11185	0.00639816
			12.4403	0.00038882	3.11056	0.0063955
			12.4444	0.000388614	3.10891	0.00639211
			12.4485	0.00038819	3.10552	0.00638515
			12.4526	0.00038762	3.10096	0.00637576
			12.4567	0.000387142	3.09714	0.00636791
			12.4608	0.000386877	3.09501	0.00636354
			12.4648	0.000386707	3.09365	0.00636074
			12.4689	0.000386582	3.09266	0.00635869
			12.473	0.000386504	3.09203	0.00635741
			12.4771	0.000386466	3.09173	0.00635678
			12.4812	0.000386417	3.09134	0.00635599
			12.4853	0.000386357	3.09085	0.00635499
			12.4894	0.000386263	3.09011	0.00635345
			12.4935	0.000386103	3.08882	0.00635081
			12.4976	0.000385927	3.08742	0.00634792
			12.5017	0.000385764	3.08611	0.00634524
			12.5058	0.000385613	3.0849	0.00634275
			12.5099	0.000385473	3.08379	0.00634046
			12.514	0.000385335	3.08268	0.00633818
			12.5181	0.000385188	3.08151	0.00633577
			12.5222	0.000385037	3.0803	0.00633329
			12.5263	0.000384896	3.07917	0.00633096
			12.5304	0.000384774	3.07819	0.00632895
			12.5345	0.000384663	3.0773	0.00632713
			12.5386	0.000384552	3.07642	0.00632531
			12.5427	0.000384443	3.07554	0.00632351
			12.5467	0.000384336	3.07468	0.00632174
			12.5508	0.000384225	3.0738	0.00631993
			12.5549	0.00038412	3.07296	0.00631819
			12.559	0.000384039	3.07231	0.00631687
			12.5631	0.000383966	3.07173	0.00631567
			12.5672	0.000383897	3.07118	0.00631453
			12.5713	0.000383822	3.07057	0.00631329
			12.5754	0.000383718	3.06975	0.00631159
			12.5795	0.000383544	3.06835	0.00630872
			12.5836	0.00038338	3.06704	0.00630603
			12.5877	0.000383225	3.0658	0.00630348
			12.5918	0.000383085	3.06468	0.00630118
			12.5959	0.000382954	3.06363	0.00629901
			12.6	0.000382817	3.06254	0.00629677
			12.6041	0.000382675	3.0614	0.00629443
			12.6082	0.000382527	3.06022	0.006292
			12.6123	0.000382389	3.05911	0.00628973
			12.6164	0.000382269	3.05815	0.00628775
			12.6205	0.000382152	3.05721	0.00628582
			12.6246	0.000382037	3.0563	0.00628394
			12.6286	0.000381923	3.05539	0.00628207
			12.6327	0.000381809	3.05447	0.00628018
			12.6368	0.000381686	3.05348	0.00627815
			12.6409	0.000381531	3.05225	0.00627561
			12.645	0.000381347	3.05078	0.00627259
			12.6491	0.000381161	3.04929	0.00626953
			12.6532	0.000381022	3.04818	0.00626724
			12.6573	0.000380883	3.04706	0.00626495
			12.6614	0.000380742	3.04593	0.00626263
			12.6655	0.000380606	3.04485	0.0062604
			12.6696	0.000380503	3.04403	0.00625871
			12.6737	0.000380417	3.04334	0.00625729
			12.6778	0.000380346	3.04277	0.00625613
			12.6819	0.000380288	3.04231	0.00625517
			12.686	0.000380242	3.04194	0.00625441
			12.6901	0.000380196	3.04156	0.00625365
			12.6942	0.00038014	3.04112	0.00625274
			12.6983	0.000380076	3.04061	0.00625169
			12.7024	0.000380005	3.04004	0.00625051
			12.7064	0.000379924	3.03939	0.00624918
			12.7105	0.000379822	3.03857	0.0062475
			12.7146	0.000379677	3.03742	0.00624512
			12.7187	0.000379509	3.03607	0.00624235
			12.7228	0.000379373	3.03498	0.00624012
			12.7269	0.000379273	3.03418	0.00623847
			12.731	0.000379172	3.03337	0.0062368
			12.7351	0.000379066	3.03253	0.00623507
			12.7392	0.00037895	3.0316	0.00623316
			12.7433	0.000378835	3.03068	0.00623127
			12.7474	0.000378726	3.02981	0.00622947
			12.7515	0.000378622	3.02898	0.00622776
			12.7556	0.000378522	3.02817	0.00622611
			12.7597	0.000378418	3.02735	0.00622441
			12.7638	0.000378314	3.02651	0.00622269
			12.7679	0.000378212	3.0257	0.00622103
			12.772	0.000378114	3.02491	0.00621941
			12.7761	0.000378017	3.02414	0.00621781
			12.7802	0.000377924	3.02339	0.00621628
			12.7843	0.000377834	3.02267	0.00621479
			12.7883	0.00037775	3.022	0.00621342
			12.7924	0.000377688	3.02151	0.0062124
			12.7965	0.000377629	3.02103	0.00621142
			12.8006	0.000377559	3.02047	0.00621027
			12.8047	0.000377478	3.01982	0.00620894
			12.8088	0.000377383	3.01906	0.00620738
			12.8129	0.000377274	3.01819	0.00620558
			12.817	0.000377158	3.01727	0.00620369
			12.8211	0.000377051	3.01641	0.00620192
			12.8252	0.000376944	3.01555	0.00620016
			12.8293	0.000376835	3.01468	0.00619836
			12.8334	0.000376722	3.01378	0.00619651
			12.8375	0.000376601	3.01281	0.00619452
			12.8416	0.000376469	3.01175	0.00619235
			12.8457	0.000376336	3.01069	0.00619017
			12.8498	0.000376195	3.00956	0.00618784
			12.8539	0.000376024	3.0082	0.00618504
			12.858	0.00037585	3.0068	0.00618217
			12.8621	0.000375715	3.00572	0.00617994
			12.8661	0.000375594	3.00476	0.00617796
			12.8702	0.000375474	3.00379	0.00617598
			12.8743	0.000375343	3.00275	0.00617383
			12.8784	0.000375206	3.00165	0.00617158
			12.8825	0.000375069	3.00056	0.00616933
			12.8866	0.000374926	2.9994	0.00616696
			12.8907	0.000374782	2.99825	0.0061646
			12.8948	0.000374663	2.9973	0.00616264
			12.8989	0.00037457	2.99656	0.00616111
			12.903	0.000374478	2.99582	0.0061596
			12.9071	0.00037438	2.99504	0.00615799
			12.9112	0.000374279	2.99423	0.00615633
			12.9153	0.000374185	2.99348	0.00615477
			12.9194	0.000374099	2.99279	0.00615336
			12.9235	0.000374015	2.99212	0.00615199
			12.9276	0.000373936	2.99149	0.00615068
			12.9317	0.000373863	2.99091	0.00614949
			12.9358	0.000373781	2.99025	0.00614813
			12.9399	0.000373685	2.98948	0.00614656
			12.944	0.000373565	2.98852	0.00614459
			12.948	0.000373436	2.98749	0.00614247
			12.9521	0.000373334	2.98667	0.00614079
			12.9562	0.000373236	2.98589	0.00613917
			12.9603	0.000373139	2.98511	0.00613757
			12.9644	0.000373044	2.98436	0.00613602
			12.9685	0.000372958	2.98366	0.0061346
			12.9726	0.000372872	2.98298	0.00613318
			12.9767	0.000372782	2.98226	0.00613171
			12.9808	0.000372679	2.98143	0.00613001
			12.9849	0.000372539	2.98031	0.0061277
			12.989	0.000372393	2.97914	0.0061253
			12.9931	0.000372247	2.97797	0.0061229
			12.9972	0.000372101	2.9768	0.00612049
			13.0013	0.000371954	2.97563	0.00611809
			13.0054	0.000371807	2.97446	0.00611567
			13.0095	0.000371656	2.97325	0.00611318
			13.0136	0.000371507	2.97205	0.00611072
			13.0177	0.000371357	2.97086	0.00610826
			13.0218	0.000371207	2.96965	0.00610579
			13.0258	0.000371048	2.96839	0.00610319
			13.0299	0.000370868	2.96694	0.00610022
			13.034	0.000370697	2.96557	0.0060974
			13.0381	0.000370583	2.96467	0.00609554
			13.0422	0.000370491	2.96393	0.00609401
			13.0463	0.000370396	2.96316	0.00609245
			13.0504	0.000370298	2.96238	0.00609084
			13.0545	0.000370195	2.96156	0.00608916
			13.0586	0.000370084	2.96068	0.00608733
			13.0627	0.000369961	2.95969	0.00608531
			13.0668	0.000369822	2.95857	0.00608301
			13.0709	0.000369696	2.95757	0.00608094
			13.075	0.000369595	2.95676	0.00607928
			13.0791	0.000369499	2.95599	0.0060777
			13.0832	0.000369403	2.95523	0.00607613
			13.0873	0.000369312	2.9545	0.00607463
			13.0914	0.000369232	2.95386	0.00607332
			13.0955	0.000369147	2.95318	0.00607192
			13.0996	0.00036904	2.95232	0.00607015
			13.1037	0.000368919	2.95135	0.00606817
			13.1077	0.000368812	2.95049	0.0060664
			13.1118	0.000368706	2.94965	0.00606466
			13.1159	0.000368592	2.94874	0.00606279
			13.12	0.000368472	2.94778	0.00606082
			13.1241	0.000368354	2.94683	0.00605887
			13.1282	0.000368244	2.94595	0.00605706
			13.1323	0.000368138	2.9451	0.00605532
			13.1364	0.000368036	2.94429	0.00605365
			13.1405	0.000367944	2.94356	0.00605213
			13.1446	0.00036786	2.94288	0.00605074
			13.1487	0.000367774	2.94219	0.00604932
			13.1528	0.00036767	2.94136	0.00604762
			13.1569	0.00036755	2.9404	0.00604565
			13.161	0.000367416	2.93933	0.00604344
			13.1651	0.000367276	2.93821	0.00604114
			13.1692	0.000367131	2.93705	0.00603875
			13.1733	0.000366981	2.93585	0.00603629
			13.1774	0.000366849	2.93479	0.00603411
			13.1815	0.000366721	2.93376	0.006032
			13.1856	0.000366593	2.93274	0.0060299
			13.1896	0.000366461	2.93169	0.00602773
			13.1937	0.000366332	2.93066	0.00602561
			13.1978	0.00036622	2.92976	0.00602377
			13.2019	0.000366108	2.92887	0.00602193
			13.206	0.000365997	2.92798	0.0060201
			13.2101	0.000365893	2.92714	0.00601838
			13.2142	0.000365811	2.92648	0.00601703
			13.2183	0.000365743	2.92594	0.00601592
			13.2224	0.000365666	2.92533	0.00601466
			13.2265	0.000365579	2.92463	0.00601323
			13.2306	0.000365473	2.92379	0.00601149
			13.2347	0.000365349	2.92279	0.00600944
			13.2388	0.000365219	2.92175	0.0060073
			13.2429	0.000365087	2.9207	0.00600513
			13.247	0.000364953	2.91963	0.00600293
			13.2511	0.000364817	2.91854	0.00600069
			13.2552	0.000364679	2.91743	0.00599842
			13.2593	0.000364546	2.91636	0.00599623
			13.2634	0.000364411	2.91529	0.00599402
			13.2674	0.000364276	2.91421	0.00599179
			13.2715	0.00036413	2.91304	0.0059894
			13.2756	0.000363958	2.91167	0.00598657
			13.2797	0.000363793	2.91035	0.00598385
			13.2838	0.000363685	2.90948	0.00598208
			13.2879	0.000363576	2.90861	0.00598027
			13.292	0.000363463	2.90771	0.00597842
			13.2961	0.000363336	2.90669	0.00597633
			13.3002	0.000363174	2.9054	0.00597367
			13.3043	0.000363011	2.90408	0.00597098
			13.3084	0.000362842	2.90274	0.00596821
			13.3125	0.000362672	2.90138	0.00596542
			13.3166	0.000362537	2.90029	0.00596319
			13.3207	0.000362445	2.89956	0.00596168
			13.3248	0.000362394	2.89915	0.00596084
			13.3289	0.000362351	2.89881	0.00596013
			13.333	0.000362309	2.89848	0.00595945
			13.3371	0.000362251	2.89801	0.00595849
			13.3412	0.000362174	2.89739	0.00595722
			13.3453	0.00036207	2.89656	0.00595552
			13.3493	0.000361977	2.89582	0.00595399
			13.3534	0.00036194	2.89552	0.00595338
			13.3575	0.000361894	2.89516	0.00595262
			13.3616	0.000361838	2.89471	0.0059517
			13.3657	0.000361767	2.89414	0.00595053
			13.3698	0.000361681	2.89345	0.00594911
			13.3739	0.000361576	2.89261	0.00594738
			13.378	0.000361446	2.89157	0.00594524
			13.3821	0.000361336	2.89069	0.00594344
			13.3862	0.000361263	2.8901	0.00594223
			13.3903	0.000361202	2.88962	0.00594123
			13.3944	0.000361143	2.88914	0.00594026
			13.3985	0.00036108	2.88864	0.00593923
			13.4026	0.000360995	2.88796	0.00593783
			13.4067	0.000360843	2.88675	0.00593533
			13.4108	0.000360696	2.88557	0.00593291
			13.4149	0.000360567	2.88454	0.00593079
			13.419	0.000360441	2.88353	0.00592871
			13.4231	0.000360314	2.88251	0.00592663
			13.4271	0.000360182	2.88146	0.00592446
			13.4312	0.000360047	2.88038	0.00592223
			13.4353	0.000359922	2.87937	0.00592017
			13.4394	0.000359822	2.87858	0.00591854
			13.4435	0.000359727	2.87781	0.00591696
			13.4476	0.000359631	2.87705	0.0059154
			13.4517	0.000359528	2.87623	0.0059137
			13.4558	0.000359416	2.87532	0.00591185
			13.4599	0.000359284	2.87427	0.00590967
			13.464	0.000359133	2.87306	0.0059072
			13.4681	0.000358999	2.87199	0.00590499
			13.4722	0.00035887	2.87096	0.00590287
			13.4763	0.000358738	2.8699	0.0059007
			13.4804	0.000358586	2.86869	0.0058982
			13.4845	0.000358424	2.86739	0.00589554
			13.4886	0.000358282	2.86626	0.0058932
			13.4927	0.000358169	2.86535	0.00589134
			13.4968	0.000358066	2.86453	0.00588964
			13.5009	0.000357955	2.86364	0.00588782
			13.505	0.000357831	2.86265	0.00588578
			13.509	0.000357687	2.8615	0.00588342
			13.5131	0.00035756	2.86048	0.00588132
			13.5172	0.000357443	2.85954	0.0058794
			13.5213	0.000357343	2.85874	0.00587775
			13.5254	0.000357259	2.85807	0.00587637
			13.5295	0.000357186	2.85749	0.00587517
			13.5336	0.00035711	2.85688	0.00587393
			13.5377	0.000357031	2.85625	0.00587263
			13.5418	0.000356944	2.85555	0.00587119
			13.5459	0.000356846	2.85476	0.00586957
			13.55	0.000356727	2.85382	0.00586763
			13.5541	0.000356575	2.8526	0.00586512
			13.5582	0.000356418	2.85135	0.00586255
			13.5623	0.000356286	2.85029	0.00586036
			13.5664	0.000356155	2.84924	0.00585821
			13.5705	0.000356023	2.84818	0.00585604
			13.5746	0.00035589	2.84712	0.00585386
			13.5787	0.000355755	2.84604	0.00585163
			13.5828	0.000355618	2.84494	0.00584938
			13.5868	0.000355471	2.84377	0.00584697
			13.5909	0.000355295	2.84236	0.00584408
			13.595	0.000355133	2.84106	0.0058414
			13.5991	0.000355049	2.84039	0.00584003
			13.6032	0.000354957	2.83966	0.00583851
			13.6073	0.000354854	2.83883	0.00583681
			13.6114	0.000354723	2.83779	0.00583467
			13.6155	0.000354541	2.83633	0.00583167
			13.6196	0.000354319	2.83455	0.00582801
			13.6237	0.000354093	2.83275	0.0058243
			13.6278	0.000353908	2.83126	0.00582125
			13.6319	0.000353788	2.8303	0.00581927
			13.636	0.000353657	2.82926	0.00581713
			13.6401	0.000353514	2.82811	0.00581477
			13.6442	0.000353349	2.82679	0.00581206
			13.6483	0.000353176	2.82541	0.00580921
			13.6524	0.000353017	2.82414	0.0058066
			13.6565	0.000352856	2.82285	0.00580395
			13.6606	0.000352662	2.8213	0.00580076
			13.6647	0.000352452	2.81962	0.00579731
			13.6687	0.000352274	2.81819	0.00579437
			13.6728	0.000352124	2.81699	0.00579191
			13.6769	0.000352003	2.81602	0.00578992
			13.681	0.000351891	2.81513	0.00578807
			13.6851	0.000351772	2.81417	0.00578612
			13.6892	0.000351647	2.81318	0.00578407
			13.6933	0.000351521	2.81217	0.00578199
			13.6974	0.000351392	2.81114	0.00577987
			13.7015	0.000351261	2.81009	0.00577772
			13.7056	0.000351126	2.80901	0.0057755
			13.7097	0.000350987	2.80789	0.00577321
			13.7138	0.000350859	2.80687	0.0057711
			13.7179	0.00035074	2.80592	0.00576915
			13.722	0.000350622	2.80498	0.0057672
			13.7261	0.000350501	2.80401	0.00576522
			13.7302	0.000350367	2.80293	0.005763
			13.7343	0.00035019	2.80152	0.0057601
			13.7384	0.000350011	2.80009	0.00575716
			13.7425	0.000349844	2.79875	0.00575441
			13.7466	0.000349698	2.79759	0.00575201
			13.7506	0.000349555	2.79644	0.00574966
			13.7547	0.000349409	2.79527	0.00574726
			13.7588	0.000349265	2.79412	0.00574489
			13.7629	0.000349141	2.79313	0.00574285
			13.767	0.000349042	2.79234	0.00574122
			13.7711	0.000348964	2.79171	0.00573993
			13.7752	0.000348895	2.79116	0.0057388
			13.7793	0.000348815	2.79052	0.00573748
			13.7834	0.000348721	2.78977	0.00573593
			13.7875	0.000348609	2.78887	0.0057341
			13.7916	0.000348494	2.78795	0.0057322
			13.7957	0.000348365	2.78692	0.00573008
			13.7998	0.000348215	2.78572	0.00572761
			13.8039	0.000348049	2.78439	0.00572488
			13.808	0.00034788	2.78304	0.0057221
			13.8121	0.000347711	2.78169	0.00571932
			13.8162	0.00034755	2.7804	0.00571668
			13.8203	0.000347396	2.77917	0.00571415
			13.8244	0.000347251	2.77801	0.00571176
			13.8284	0.00034712	2.77696	0.0057096
			13.8325	0.00034699	2.77592	0.00570746
			13.8366	0.000346851	2.77481	0.00570518
			13.8407	0.000346708	2.77367	0.00570283
			13.8448	0.000346576	2.77261	0.00570065
			13.8489	0.000346461	2.77169	0.00569877
			13.853	0.000346353	2.77082	0.00569699
			13.8571	0.000346247	2.76997	0.00569524
			13.8612	0.000346149	2.76919	0.00569363
			13.8653	0.000346075	2.7686	0.00569241
			13.8694	0.000345999	2.76799	0.00569116
			13.8735	0.000345925	2.7674	0.00568995
			13.8776	0.000345863	2.7669	0.00568892
			13.8817	0.000345792	2.76634	0.00568777
			13.8858	0.000345714	2.76571	0.00568648
			13.8899	0.000345627	2.76502	0.00568505
			13.894	0.000345531	2.76425	0.00568346
			13.8981	0.000345432	2.76346	0.00568184
			13.9022	0.000345331	2.76265	0.00568017
			13.9063	0.000345218	2.76174	0.00567831
			13.9103	0.000345088	2.7607	0.00567618
			13.9144	0.000344972	2.75977	0.00567427
			13.9185	0.000344858	2.75887	0.0056724
			13.9226	0.00034475	2.758	0.00567061
			13.9267	0.000344648	2.75719	0.00566895
			13.9308	0.000344547	2.75638	0.00566728
			13.9349	0.000344441	2.75553	0.00566554
			13.939	0.000344318	2.75455	0.00566352
			13.9431	0.000344185	2.75348	0.00566132
			13.9472	0.000344067	2.75254	0.00565939
			13.9513	0.00034397	2.75176	0.00565779
			13.9554	0.000343881	2.75105	0.00565632
			13.9595	0.000343805	2.75044	0.00565508
			13.9636	0.000343742	2.74994	0.00565404
			13.9677	0.000343687	2.74949	0.00565313
			13.9718	0.000343636	2.74908	0.00565229
			13.9759	0.000343585	2.74868	0.00565146
			13.98	0.000343542	2.74834	0.00565075
			13.9841	0.000343517	2.74814	0.00565034
			13.9881	0.0003435	2.748	0.00565006
			13.9922	0.000343489	2.74791	0.00564987
			13.9963	0.000343477	2.74781	0.00564968
			14.0004	0.000343465	2.74772	0.00564948
			14.0045	0.000343449	2.74759	0.00564921
			14.0086	0.000343419	2.74735	0.00564872
			14.0127	0.000343368	2.74694	0.00564788
			14.0168	0.00034328	2.74624	0.00564643
			14.0209	0.000343193	2.74555	0.00564501
			14.025	0.000343118	2.74494	0.00564377
			14.0291	0.000343038	2.7443	0.00564246
			14.0332	0.000342938	2.7435	0.00564082
			14.0373	0.000342814	2.74251	0.00563878
			14.0414	0.000342665	2.74132	0.00563632
			14.0455	0.00034254	2.74032	0.00563426
			14.0496	0.000342475	2.7398	0.00563319
			14.0537	0.000342454	2.73963	0.00563285
			14.0578	0.000342431	2.73944	0.00563247
			14.0619	0.000342395	2.73916	0.00563188
			14.066	0.000342322	2.73857	0.00563068
			14.07	0.00034222	2.73776	0.005629
			14.0741	0.000342113	2.7369	0.00562724
			14.0782	0.000341999	2.73599	0.00562536
			14.0823	0.000341868	2.73494	0.00562321
			14.0864	0.000341728	2.73382	0.00562091
			14.0905	0.000341622	2.73298	0.00561917
			14.0946	0.00034152	2.73216	0.0056175
			14.0987	0.000341418	2.73134	0.00561581
			14.1028	0.000341316	2.73053	0.00561414
			14.1069	0.000341218	2.72974	0.00561252
			14.111	0.000341118	2.72895	0.00561088
			14.1151	0.000341017	2.72813	0.00560921
			14.1192	0.000340921	2.72737	0.00560764
			14.1233	0.000340856	2.72685	0.00560657
			14.1274	0.0003408	2.7264	0.00560565
			14.1315	0.000340745	2.72596	0.00560474
			14.1356	0.000340694	2.72555	0.0056039
			14.1397	0.00034064	2.72512	0.00560302
			14.1438	0.000340575	2.7246	0.00560195
			14.1479	0.000340498	2.72398	0.00560068
			14.1519	0.000340405	2.72324	0.00559915
			14.156	0.000340305	2.72244	0.00559751
			14.1601	0.000340202	2.72162	0.00559581
			14.1642	0.000340092	2.72074	0.00559401
			14.1683	0.000339972	2.71977	0.00559202
			14.1724	0.000339851	2.71881	0.00559004
			14.1765	0.000339729	2.71783	0.00558803
			14.1806	0.000339605	2.71684	0.00558599
			14.1847	0.000339484	2.71587	0.005584
			14.1888	0.000339364	2.71491	0.00558203
			14.1929	0.000339242	2.71393	0.00558001
			14.197	0.000339106	2.71285	0.00557779
			14.2011	0.000338961	2.71168	0.00557539
			14.2052	0.000338808	2.71046	0.00557287
			14.2093	0.000338637	2.7091	0.00557007
			14.2134	0.000338466	2.70773	0.00556725
			14.2175	0.000338281	2.70625	0.00556421
			14.2216	0.000338094	2.70475	0.00556114
			14.2257	0.000337949	2.70359	0.00555876
			14.2297	0.000337867	2.70294	0.00555741
			14.2338	0.000337793	2.70234	0.00555619
			14.2379	0.000337714	2.70171	0.00555489
			14.242	0.000337612	2.7009	0.00555321
			14.2461	0.000337492	2.69994	0.00555124
			14.2502	0.000337384	2.69907	0.00554946
			14.2543	0.000337323	2.69859	0.00554846
			14.2584	0.000337263	2.6981	0.00554747
			14.2625	0.0003372	2.6976	0.00554644
			14.2666	0.000337136	2.69709	0.00554538
			14.2707	0.000337073	2.69658	0.00554434
			14.2748	0.000337014	2.69611	0.00554338
			14.2789	0.000336952	2.69562	0.00554236
			14.283	0.000336876	2.69501	0.00554111
			14.2871	0.000336776	2.69421	0.00553946
			14.2912	0.000336632	2.69306	0.0055371
			14.2953	0.000336505	2.69204	0.00553501
			14.2994	0.000336472	2.69178	0.00553446
			14.3035	0.000336649	2.69319	0.00553737
			14.3076	0.000336817	2.69453	0.00554013
			14.3116	0.000336813	2.6945	0.00554007
			14.3157	0.000336682	2.69346	0.00553792
			14.3198	0.000336549	2.69239	0.00553573
			14.3239	0.000336407	2.69126	0.00553339
			14.328	0.000336249	2.68999	0.0055308
			14.3321	0.00033611	2.68888	0.00552851
			14.3362	0.000335984	2.68788	0.00552644
			14.3403	0.000335858	2.68687	0.00552436
			14.3444	0.000335714	2.68571	0.00552199
			14.3485	0.000335555	2.68444	0.00551938
			14.3526	0.000335393	2.68315	0.00551671
			14.3567	0.000335234	2.68187	0.00551409
			14.3608	0.00033511	2.68088	0.00551206
			14.3649	0.000334991	2.67993	0.0055101
			14.369	0.00033487	2.67896	0.00550812
			14.3731	0.000334747	2.67798	0.00550608
			14.3772	0.000334612	2.6769	0.00550387
			14.3813	0.000334455	2.67564	0.00550129
			14.3854	0.000334272	2.67418	0.00549828
			14.3894	0.000334058	2.67247	0.00549476
			14.3935	0.000333846	2.67077	0.00549127
			14.3976	0.00033364	2.66912	0.00548788
			14.4017	0.000333457	2.66765	0.00548486
			14.4058	0.000333312	2.66649	0.00548248
			14.4099	0.00033318	2.66544	0.00548031
			14.414	0.000333052	2.66442	0.00547821
			14.4181	0.000332926	2.66341	0.00547614
			14.4222	0.000332796	2.66237	0.00547399
			14.4263	0.000332657	2.66126	0.00547171
			14.4304	0.000332488	2.6599	0.00546892
			14.4345	0.000332275	2.6582	0.00546542
			14.4386	0.000332083	2.65666	0.00546226
			14.4427	0.000331934	2.65547	0.00545982
			14.4468	0.000331799	2.65439	0.00545759
			14.4509	0.000331681	2.65345	0.00545566
			14.455	0.000331575	2.6526	0.00545391
			14.4591	0.000331542	2.65233	0.00545336
			14.4632	0.000332109	2.65687	0.0054627
			14.4673	0.000333874	2.671	0.00549173
			14.4713	0.000335548	2.68439	0.00551926
			14.4754	0.000336918	2.69535	0.0055418
			14.4795	0.000337676	2.70141	0.00555427
			14.4836	0.000337167	2.69734	0.00554589
			14.4877	0.000336665	2.69332	0.00553763
			14.4918	0.000336186	2.68949	0.00552976
			14.4959	0.00033576	2.68608	0.00552275
			14.5	0.000335373	2.68298	0.00551638
			14.5041	0.000335015	2.68012	0.0055105
			14.5082	0.000334669	2.67736	0.00550481
			14.5123	0.000334329	2.67463	0.00549921
			14.5164	0.000333978	2.67182	0.00549343
			14.5205	0.00033382	2.67056	0.00549083
			14.5246	0.000334685	2.67748	0.00550507
			14.5287	0.000336842	2.69474	0.00554054
			14.5328	0.000339203	2.71362	0.00557938
			14.5369	0.000341588	2.7327	0.00561861
			14.541	0.000343916	2.75133	0.0056569
			14.5451	0.00034607	2.76856	0.00569233
			14.5491	0.000347779	2.78223	0.00572044
			14.5532	0.000348981	2.79185	0.00574022
			14.5573	0.000349202	2.79362	0.00574385
			14.5614	0.000348111	2.78488	0.00572589
			14.5655	0.000346935	2.77548	0.00570655
			14.5696	0.000345827	2.76662	0.00568834
			14.5737	0.000344787	2.75829	0.00567122
			14.5778	0.000343811	2.75048	0.00565517
			14.5819	0.000342895	2.74316	0.0056401
			14.586	0.000342023	2.73618	0.00562577
			14.5901	0.000341188	2.7295	0.00561203
			14.5942	0.000340375	2.723	0.00559866
			14.5983	0.000339559	2.71648	0.00558524
			14.6024	0.000338787	2.7103	0.00557254
			14.6065	0.000338067	2.70453	0.00556069
			14.6106	0.000337401	2.69921	0.00554973
			14.6147	0.000336792	2.69433	0.00553972
			14.6188	0.000336208	2.68967	0.00553012
			14.6229	0.000335648	2.68518	0.0055209
			14.627	0.000335095	2.68076	0.0055118
			14.631	0.000334514	2.67611	0.00550226
			14.6351	0.000333943	2.67154	0.00549286
			14.6392	0.000333399	2.66719	0.00548391
			14.6433	0.00033288	2.66304	0.00547538
			14.6474	0.000332384	2.65907	0.00546722
			14.6515	0.000331908	2.65526	0.00545939
			14.6556	0.000331448	2.65158	0.00545182
			14.6597	0.000330932	2.64745	0.00544333
			14.6638	0.000330204	2.64163	0.00543136
			14.6679	0.000329547	2.63638	0.00542055
			14.672	0.000329039	2.63231	0.00541219
			14.6761	0.000328602	2.62882	0.00540502
			14.6802	0.000328227	2.62581	0.00539884
			14.6843	0.000327884	2.62307	0.00539319
			14.6884	0.000327568	2.62054	0.00538799
			14.6925	0.000327265	2.61812	0.00538302
			14.6966	0.000326963	2.61571	0.00537806
			14.7007	0.00032666	2.61328	0.00537307
			14.7048	0.000326343	2.61074	0.00536785
			14.7089	0.000325986	2.60788	0.00536197
			14.7129	0.000325531	2.60425	0.0053545
			14.717	0.000324927	2.59941	0.00534455
			14.7211	0.000324492	2.59594	0.00533741
			14.7252	0.000324213	2.59371	0.00533282
			14.7293	0.000324001	2.592	0.00532932
			14.7334	0.000323811	2.59049	0.0053262
			14.7375	0.000323621	2.58897	0.00532308
			14.7416	0.000323429	2.58743	0.00531991
			14.7457	0.000323224	2.5858	0.00531656
			14.7498	0.000323006	2.58405	0.00531297
			14.7539	0.000322806	2.58245	0.00530967
			14.758	0.000322621	2.58097	0.00530664
			14.7621	0.000322456	2.57965	0.00530391
			14.7662	0.000322323	2.57858	0.00530172
			14.7703	0.000322201	2.57761	0.00529972
			14.7744	0.000322073	2.57658	0.00529761
			14.7785	0.000321945	2.57556	0.00529551
			14.7826	0.000321837	2.5747	0.00529373
			14.7867	0.000321731	2.57385	0.00529199
			14.7907	0.000321628	2.57302	0.0052903
			14.7948	0.00032168	2.57344	0.00529116
			14.7989	0.000322273	2.57818	0.0053009
			14.803	0.000322882	2.58306	0.00531093
			14.8071	0.000322995	2.58396	0.00531278
			14.8112	0.000322743	2.58194	0.00530864
			14.8153	0.00032249	2.57992	0.00530448
			14.8194	0.000322242	2.57794	0.0053004
			14.8235	0.000322017	2.57614	0.0052967
			14.8276	0.000321821	2.57457	0.00529347
			14.8317	0.000321635	2.57308	0.00529041
			14.8358	0.000321447	2.57157	0.00528731
			14.8399	0.000321413	2.5713	0.00528676
			14.844	0.000322266	2.57813	0.00530079
			14.8481	0.000324434	2.59547	0.00533645
			14.8522	0.000326939	2.61551	0.00537765
			14.8563	0.000329579	2.63663	0.00542108
			14.8604	0.000331744	2.65395	0.00545669
			14.8645	0.000333372	2.66698	0.00548347
			14.8686	0.000333992	2.67193	0.00549366
			14.8726	0.000333292	2.66634	0.00548216
			14.8767	0.000332482	2.65986	0.00546883
			14.8808	0.000331703	2.65362	0.00545601
			14.8849	0.000330947	2.64757	0.00544357
			14.889	0.000330194	2.64155	0.0054312
			14.8931	0.000329467	2.63573	0.00541923
			14.8972	0.000328814	2.63051	0.00540849
			14.9013	0.000328209	2.62568	0.00539855
			14.9054	0.000327635	2.62108	0.00538911
			14.9095	0.000327087	2.6167	0.00538009
			14.9136	0.000326553	2.61242	0.00537131
			14.9177	0.000326027	2.60822	0.00536266
			14.9218	0.000325482	2.60385	0.00535368
			14.9259	0.000324913	2.59931	0.00534434
			14.93	0.000324416	2.59533	0.00533616
			14.9341	0.000323993	2.59194	0.00532919
			14.9382	0.000323584	2.58867	0.00532248
			14.9423	0.000323189	2.58551	0.00531597
			14.9464	0.000322803	2.58243	0.00530963
			14.9504	0.000322432	2.57945	0.00530352
			14.9545	0.000322072	2.57658	0.0052976
			14.9586	0.000321719	2.57375	0.0052918
			14.9627	0.00032137	2.57096	0.00528605
			14.9668	0.000321046	2.56837	0.00528073
			14.9709	0.000320726	2.56581	0.00527546
			14.975	0.000320406	2.56325	0.00527019
			14.9791	0.000320085	2.56068	0.00526491
			14.9832	0.000319785	2.55828	0.00525998
			14.9873	0.000319494	2.55595	0.0052552
			14.9914	0.000319203	2.55362	0.00525041
			14.9955	0.000318918	2.55134	0.00524572
			14.9996	0.00031866	2.54928	0.00524148
			15.0037	0.000318415	2.54732	0.00523745
			15.0078	0.000318177	2.54542	0.00523353
			15.0119	0.000317943	2.54354	0.00522968
			15.016	0.000317709	2.54167	0.00522583
			15.0201	0.00031748	2.53984	0.00522207
			15.0242	0.000317484	2.53987	0.00522214
			15.0283	0.000318613	2.54891	0.00524071
			15.0323	0.000321021	2.56817	0.00528031
			15.0364	0.000323587	2.5887	0.00532252
			15.0405	0.000326169	2.60935	0.00536498
			15.0446	0.000328726	2.62981	0.00540706
			15.0487	0.000331143	2.64914	0.0054468
			15.0528	0.000333424	2.66739	0.00548432
			15.0569	0.00033557	2.68456	0.00551962
			15.061	0.000337189	2.69751	0.00554626
			15.0651	0.000337085	2.69668	0.00554455
			15.0692	0.000335757	2.68606	0.00552271
			15.0733	0.000334492	2.67594	0.00550189
			15.0774	0.000333284	2.66627	0.00548202
			15.0815	0.000332125	2.657	0.00546296
			15.0856	0.000331019	2.64815	0.00544477
			15.0897	0.000329962	2.6397	0.00542738
			15.0938	0.000328956	2.63164	0.00541083
			15.0979	0.000327996	2.62396	0.00539503
			15.102	0.000327092	2.61673	0.00538017
			15.1061	0.000326271	2.61017	0.00536667
			15.1101	0.00032549	2.60392	0.00535383
			15.1142	0.000324741	2.59793	0.0053415
			15.1183	0.00032401	2.59208	0.00532948
			15.1224	0.000323278	2.58623	0.00531744
			15.1265	0.000322759	2.58208	0.00530891
			15.1306	0.00032291	2.58328	0.00531138
			15.1347	0.000323456	2.58765	0.00532036
			15.1388	0.000323962	2.59169	0.00532869
			15.1429	0.000324155	2.59324	0.00533186
			15.147	0.00032343	2.58744	0.00531994
			15.1511	0.000322728	2.58183	0.00530839
			15.1552	0.000322027	2.57622	0.00529686
			15.1593	0.000321327	2.57062	0.00528535
			15.1634	0.000320674	2.56539	0.0052746
			15.1675	0.000320057	2.56045	0.00526445
			15.1716	0.000319476	2.55581	0.00525491
			15.1757	0.000319142	2.55313	0.0052494
			15.1798	0.000319853	2.55882	0.00526109
			15.1839	0.000321875	2.575	0.00529435
			15.188	0.000324125	2.593	0.00533137
			15.192	0.000326417	2.61133	0.00536907
			15.1961	0.000328654	2.62923	0.00540587
			15.2002	0.000330707	2.64566	0.00543963
			15.2043	0.000332315	2.65852	0.00546608
			15.2084	0.000333419	2.66735	0.00548424
			15.2125	0.000333563	2.6685	0.00548661
			15.2166	0.000332423	2.65938	0.00546785
			15.2207	0.000331149	2.64919	0.00544691
			15.2248	0.000329905	2.63924	0.00542643
			15.2289	0.000328921	2.63137	0.00541025
			15.233	0.000328788	2.6303	0.00540807
			15.2371	0.000329262	2.63409	0.00541586
			15.2412	0.000329889	2.63911	0.00542618
			15.2453	0.000330412	2.64329	0.00543478
			15.2494	0.000330819	2.64656	0.00544148
			15.2535	0.000331066	2.64853	0.00544555
			15.2576	0.000330867	2.64693	0.00544226
			15.2617	0.00032968	2.63744	0.00542274
			15.2658	0.000328819	2.63055	0.00540858
			15.2699	0.000328166	2.62533	0.00539785
			15.2739	0.000327727	2.62181	0.00539061
			15.278	0.000327877	2.62302	0.00539309
			15.2821	0.000329335	2.63468	0.00541707
			15.2862	0.000330871	2.64697	0.00544233
			15.2903	0.000332462	2.6597	0.0054685
			15.2944	0.000334034	2.67227	0.00549435
			15.2985	0.000335352	2.68282	0.00551604
			15.3026	0.000335781	2.68624	0.00552309
			15.3067	0.000335202	2.68162	0.00551357
			15.3108	0.000333502	2.66802	0.00548561
			15.3149	0.000331921	2.65536	0.0054596
			15.319	0.000330687	2.6455	0.00543931
			15.3231	0.000330477	2.64382	0.00543585
			15.3272	0.000330701	2.6456	0.00543953
			15.3313	0.00033074	2.64592	0.00544018
			15.3354	0.000329991	2.63993	0.00542786
			15.3395	0.000328649	2.62919	0.00540578
			15.3436	0.000327266	2.61813	0.00538303
			15.3477	0.000326217	2.60974	0.00536578
			15.3517	0.000326531	2.61225	0.00537094
			15.3558	0.00032815	2.6252	0.00539757
			15.3599	0.00032987	2.63896	0.00542586
			15.364	0.000331575	2.6526	0.00545391
			15.3681	0.000333219	2.66575	0.00548095
			15.3722	0.000334795	2.67836	0.00550688
			15.3763	0.000336278	2.69023	0.00553127
			15.3804	0.000337671	2.70137	0.00555418
			15.3845	0.000338985	2.71188	0.0055758
			15.3886	0.000340258	2.72206	0.00559673
			15.3927	0.000341469	2.73175	0.00561665
			15.3968	0.000342618	2.74095	0.00563556
			15.4009	0.000343709	2.74967	0.0056535
			15.405	0.000344728	2.75782	0.00567026
			15.4091	0.00034567	2.76536	0.00568575
			15.4132	0.000346515	2.77212	0.00569966
			15.4173	0.000347308	2.77847	0.0057127
			15.4214	0.00034811	2.78488	0.00572589
			15.4255	0.000348875	2.791	0.00573847
			15.4296	0.000349593	2.79674	0.00575028
			15.4336	0.000350259	2.80207	0.00576123
			15.4377	0.000350874	2.80699	0.00577135
			15.4418	0.000351436	2.81149	0.0057806
			15.4459	0.000351856	2.81485	0.00578751
			15.45	0.00035153	2.81224	0.00578214
			15.4541	0.000349849	2.79879	0.0057545
			15.4582	0.000348145	2.78516	0.00572646
			15.4623	0.00034788	2.78304	0.00572211
			15.4664	0.000348092	2.78474	0.0057256
			15.4705	0.000348542	2.78834	0.005733
			15.4746	0.000349166	2.79333	0.00574326
			15.4787	0.000349786	2.79829	0.00575346
			15.4828	0.000350324	2.80259	0.0057623
			15.4869	0.000350542	2.80434	0.0057659
			15.491	0.000350391	2.80313	0.0057634
			15.4951	0.000349417	2.79534	0.00574738
			15.4992	0.000347119	2.77695	0.00570959
			15.5033	0.000344564	2.75651	0.00566756
			15.5074	0.000342107	2.73686	0.00562715
			15.5114	0.000339768	2.71814	0.00558867
			15.5155	0.000337575	2.7006	0.00555259
			15.5196	0.000335533	2.68427	0.00551902
			15.5237	0.000333567	2.66853	0.00548667
			15.5278	0.000331677	2.65341	0.00545559
			15.5319	0.000329877	2.63901	0.00542598
			15.536	0.000328153	2.62522	0.00539762
			15.5401	0.000326483	2.61186	0.00537015
			15.5442	0.000324893	2.59915	0.00534401
			15.5483	0.000323377	2.58701	0.00531906
			15.5524	0.000321928	2.57542	0.00529523
			15.5565	0.000320554	2.56443	0.00527263
			15.5606	0.000319297	2.55437	0.00525195
			15.5647	0.000318154	2.54523	0.00523316
			15.5688	0.000317054	2.53643	0.00521506
			15.5729	0.000315995	2.52796	0.00519765
			15.577	0.000314978	2.51982	0.00518092
			15.5811	0.000313989	2.51192	0.00516465
			15.5852	0.000313192	2.50553	0.00515154
			15.5893	0.000313311	2.50649	0.00515349
			15.5933	0.000314768	2.51814	0.00517746
			15.5974	0.000316579	2.53263	0.00520725
			15.6015	0.00031849	2.54792	0.00523869
			15.6056	0.000320394	2.56315	0.00527
			15.6097	0.000322217	2.57774	0.00529999
			15.6138	0.000323864	2.59091	0.00532708
			15.6179	0.000325315	2.60252	0.00535094
			15.622	0.000326313	2.6105	0.00536736
			15.6261	0.00032667	2.61336	0.00537323
			15.6302	0.000327379	2.61903	0.0053849
			15.6343	0.000328009	2.62407	0.00539526
			15.6384	0.000328451	2.62761	0.00540252
			15.6425	0.000328077	2.62462	0.00539638
			15.6466	0.000326399	2.61119	0.00536877
			15.6507	0.000324654	2.59723	0.00534007
			15.6548	0.000323003	2.58402	0.00531291
			15.6589	0.00032152	2.57216	0.00528852
			15.663	0.000320406	2.56325	0.0052702
			15.6671	0.000319375	2.555	0.00525323
			15.6711	0.000318197	2.54558	0.00523386
			15.6752	0.00031692	2.53536	0.00521285
			15.6793	0.00031568	2.52544	0.00519246
[truncated: 1,299 more rows]

## Sheet: Figure 4 FS 2B
hL1ORF1p-DNTR			volume	OD280	OD280	OD280		volume	MW
[truncated: 2,444 more rows]

[truncated: 1 more sheets: Figure 4 FS 2C]
