# Supplementary material for: Human LINE-1 retrotransposition requires a metastable coiled coil and a positively charged N-terminus in L1ORF1p
Source: eLife journal article supplement (doi:10.7554/elife.34960), 2018-03-22
Supplement: supp [file elife-34960-supp-v1.zip › elife_poa_e34960_Figure_5_source_data_1.xlsx]

## Sheet: Figure 5A
hL1ORF1p-Dcons			volume	OD280	OD280	OD280		volume	MW
			(ml)	relative		normalized		(ml)	kDa
Injection volume	30 µl
Superdex 75			7.00226	6.22338e-05	0.49787	0.0023906		10.8626	11.7041
			7.00636	6.23171e-05	0.498537	0.00239381		10.8667	11.7204
			7.01045	6.24306e-05	0.499445	0.00239817		10.8708	11.7361
			7.01455	6.25875e-05	0.5007	0.0024042		10.8749	11.7516
			7.01864	6.27676e-05	0.50214	0.00241111		10.879	11.7679
			7.02274	6.29617e-05	0.503693	0.00241857		10.8831	11.784
			7.02683	6.31583e-05	0.505266	0.00242612		10.8872	11.8015
			7.03093	6.33488e-05	0.50679	0.00243344		10.8913	11.8194
			7.03502	6.35233e-05	0.508187	0.00244014		10.8954	11.8365
			7.03912	6.36796e-05	0.509437	0.00244614		10.8995	11.8534
			7.04321	6.38127e-05	0.510501	0.00245126		10.9036	11.8694
			7.04731	6.39161e-05	0.511329	0.00245523		10.9077	11.8857
			7.0514	6.39903e-05	0.511922	0.00245808		10.9118	11.9026
			7.0555	6.40352e-05	0.512281	0.0024598		10.9159	11.9187
			7.05959	6.40589e-05	0.512471	0.00246071		10.92	11.9355
			7.06369	6.40642e-05	0.512514	0.00246092		10.9241	11.9513
			7.06778	6.40587e-05	0.512469	0.00246071		10.9282	11.967
			7.07188	6.40463e-05	0.51237	0.00246023		10.9322	11.982
			7.07597	6.40333e-05	0.512267	0.00245973		10.9363	11.9972
			7.08007	6.40222e-05	0.512177	0.0024593		10.9404	12.0122
			7.08416	6.40201e-05	0.51216	0.00245922		10.9445	12.0264
			7.08826	6.40261e-05	0.512209	0.00245946		10.9486	12.0411
			7.09235	6.4036e-05	0.512288	0.00245983		10.9527	12.0557
			7.09645	6.40454e-05	0.512363	0.0024602		10.9568	12.0696
			7.10054	6.40491e-05	0.512393	0.00246034		10.9609	12.0835
			7.10464	6.40528e-05	0.512423	0.00246048		10.965	12.097
			7.10873	6.40501e-05	0.512401	0.00246038		10.9691	12.1101
			7.11283	6.40405e-05	0.512324	0.00246001		10.9732	12.1235
			7.11692	6.40251e-05	0.512201	0.00245942		10.9773	12.138
			7.12102	6.40104e-05	0.512083	0.00245885		10.9814	12.1502
			7.12511	6.39939e-05	0.511951	0.00245822		10.9855	12.161
			7.12921	6.39769e-05	0.511815	0.00245756		10.9896	12.1726
			7.1333	6.39552e-05	0.511642	0.00245673		10.9937	12.1847
			7.1374	6.39325e-05	0.51146	0.00245586		10.9978	12.197
			7.14149	6.39017e-05	0.511214	0.00245468		11.0019	12.209
			7.14559	6.38615e-05	0.510892	0.00245313		11.006	12.2204
			7.14968	6.3808e-05	0.510464	0.00245108		11.0101	12.2319
			7.15378	6.37361e-05	0.509888	0.00244831		11.0141	12.2431
			7.15787	6.3659e-05	0.509272	0.00244535		11.0182	12.2536
			7.16197	6.3578e-05	0.508624	0.00244224		11.0223	12.2637
			7.16606	6.34959e-05	0.507967	0.00243909		11.0264	12.2732
			7.17016	6.34174e-05	0.507339	0.00243607		11.0305	12.2827
			7.17425	6.33492e-05	0.506794	0.00243345		11.0346	12.2919
			7.17834	6.32965e-05	0.506372	0.00243143		11.0387	12.2991
			7.18244	6.32609e-05	0.506087	0.00243006		11.0428	12.3074
			7.18653	6.32501e-05	0.506001	0.00242965		11.0469	12.3158
			7.19063	6.32613e-05	0.50609	0.00243008		11.051	12.3247
			7.19472	6.32891e-05	0.506312	0.00243114		11.0551	12.3333
			7.19882	6.33283e-05	0.506626	0.00243265		11.0592	12.3401
			7.20291	6.33796e-05	0.507037	0.00243462		11.0633	12.3483
			7.20701	6.34344e-05	0.507475	0.00243673		11.0674	12.3554
			7.2111	6.34891e-05	0.507912	0.00243883		11.0715	12.3626
			7.2152	6.35396e-05	0.508317	0.00244077		11.0756	12.3708
			7.21929	6.35879e-05	0.508703	0.00244262		11.0797	12.3791
			7.22339	6.36387e-05	0.50911	0.00244457		11.0838	12.3868
			7.22748	6.3697e-05	0.509576	0.00244681		11.0879	12.3936
			7.23158	6.37594e-05	0.510075	0.00244921		11.0919	12.4007
			7.23567	6.38268e-05	0.510614	0.0024518		11.096	12.4066
			7.23977	6.39004e-05	0.511203	0.00245463		11.1001	12.4104
			7.24386	6.39623e-05	0.511698	0.002457		11.1042	12.414
			7.24796	6.40205e-05	0.512164	0.00245924		11.1083	12.4194
			7.25205	6.40705e-05	0.512564	0.00246116		11.1124	12.4242
			7.25615	6.41056e-05	0.512845	0.00246251		11.1165	12.4275
			7.26024	6.413e-05	0.51304	0.00246344		11.1206	12.4325
			7.26434	6.41369e-05	0.513095	0.00246371		11.1247	12.4378
			7.26843	6.41252e-05	0.513002	0.00246326		11.1288	12.401
			7.27253	6.40969e-05	0.512775	0.00246218
			7.27662	6.40554e-05	0.512444	0.00246058
			7.28072	6.39263e-05	0.511411	0.00245562
			7.28481	6.36764e-05	0.509411	0.00244602
			7.28891	6.33227e-05	0.506581	0.00243243
			7.293	6.30215e-05	0.504172	0.00242086
			7.2971	6.26822e-05	0.501457	0.00240783
			7.30119	6.23183e-05	0.498547	0.00239385
			7.30529	6.19545e-05	0.495636	0.00237988
			7.30938	6.16223e-05	0.492979	0.00236712
			7.31348	6.13595e-05	0.490876	0.00235702
			7.31757	6.11965e-05	0.489572	0.00235076
			7.32167	6.11496e-05	0.489197	0.00234896
			7.32576	6.1222e-05	0.489776	0.00235174
			7.32986	6.13995e-05	0.491196	0.00235856
			7.33395	6.16563e-05	0.493251	0.00236842
			7.33805	6.19542e-05	0.495633	0.00237987
			7.34214	6.22661e-05	0.498128	0.00239185
			7.34624	6.25766e-05	0.500612	0.00240377
			7.35033	6.28585e-05	0.502868	0.0024146
			7.35443	6.31022e-05	0.504817	0.00242396
			7.35852	6.33064e-05	0.506451	0.00243181
			7.36261	6.34739e-05	0.507791	0.00243824
			7.36671	6.3611e-05	0.508888	0.00244351
			7.3708	6.37235e-05	0.509788	0.00244783
			7.3749	6.38009e-05	0.510407	0.00245081
			7.37899	6.38504e-05	0.510804	0.00245271
			7.38309	6.38704e-05	0.510963	0.00245347
			7.38718	6.38596e-05	0.510877	0.00245306
			7.39128	6.38165e-05	0.510532	0.00245141
			7.39537	6.37393e-05	0.509914	0.00244844
			7.39947	6.36317e-05	0.509053	0.0024443
			7.40356	6.35129e-05	0.508103	0.00243974
			7.40766	6.33865e-05	0.507092	0.00243488
			7.41175	6.32637e-05	0.50611	0.00243017
			7.41585	6.31636e-05	0.505309	0.00242632
			7.41994	6.30866e-05	0.504693	0.00242337
			7.42404	6.30383e-05	0.504306	0.00242151
			7.42813	6.30148e-05	0.504119	0.00242061
			7.43223	6.29992e-05	0.503993	0.00242001
			7.43632	6.30077e-05	0.504062	0.00242033
			7.44042	6.30291e-05	0.504233	0.00242116
			7.44451	6.30517e-05	0.504413	0.00242202
			7.44861	6.30753e-05	0.504603	0.00242293
			7.4527	6.30911e-05	0.504729	0.00242354
			7.4568	6.30988e-05	0.504791	0.00242384
			7.46089	6.30989e-05	0.504791	0.00242384
			7.46499	6.30971e-05	0.504777	0.00242377
			7.46908	6.30968e-05	0.504775	0.00242376
			7.47318	6.31007e-05	0.504805	0.00242391
			7.47727	6.31092e-05	0.504874	0.00242423
			7.48137	6.31211e-05	0.504969	0.00242469
			7.48546	6.31335e-05	0.505068	0.00242517
			7.48956	6.31513e-05	0.50521	0.00242585
			7.49365	6.31709e-05	0.505367	0.0024266
			7.49775	6.31811e-05	0.505449	0.002427
			7.50184	6.31784e-05	0.505428	0.00242689
			7.50594	6.31687e-05	0.50535	0.00242652
			7.51003	6.31579e-05	0.505263	0.00242611
			7.51413	6.31439e-05	0.505151	0.00242557
			7.51822	6.3127e-05	0.505016	0.00242492
			7.52232	6.31079e-05	0.504864	0.00242419
			7.52641	6.30878e-05	0.504703	0.00242341
			7.53051	6.30691e-05	0.504552	0.00242269
			7.5346	6.30537e-05	0.50443	0.0024221
			7.5387	6.3043e-05	0.504344	0.00242169
			7.54279	6.30513e-05	0.504411	0.00242201
			7.54689	6.30766e-05	0.504613	0.00242298
			7.55098	6.31172e-05	0.504937	0.00242454
			7.55507	6.31735e-05	0.505388	0.0024267
			7.55917	6.32411e-05	0.505929	0.0024293
			7.56326	6.33198e-05	0.506558	0.00243232
			7.56736	6.34055e-05	0.507244	0.00243562
			7.57145	6.34739e-05	0.507791	0.00243824
			7.57555	6.35433e-05	0.508347	0.00244091
			7.57964	6.36085e-05	0.508868	0.00244342
			7.58374	6.36568e-05	0.509254	0.00244527
			7.58783	6.36852e-05	0.509481	0.00244636
			7.59193	6.36878e-05	0.509502	0.00244646
			7.59602	6.36721e-05	0.509377	0.00244586
			7.60012	6.36434e-05	0.509147	0.00244476
			7.60421	6.36065e-05	0.508852	0.00244334
			7.60831	6.35659e-05	0.508527	0.00244178
			7.6124	6.3525e-05	0.5082	0.00244021
			7.6165	6.34793e-05	0.507835	0.00243845
			7.62059	6.34278e-05	0.507422	0.00243647
			7.62469	6.33826e-05	0.507061	0.00243474
			7.62878	6.33358e-05	0.506686	0.00243294
			7.63288	6.32855e-05	0.506284	0.00243101
			7.63697	6.32254e-05	0.505803	0.0024287
			7.64107	6.31517e-05	0.505213	0.00242586
			7.64516	6.30817e-05	0.504654	0.00242318
			7.64926	6.30077e-05	0.504061	0.00242033
			7.65335	6.29312e-05	0.50345	0.0024174
			7.65745	6.2856e-05	0.502848	0.00241451
			7.66154	6.27967e-05	0.502374	0.00241223
			7.66564	6.27515e-05	0.502012	0.00241049
			7.66973	6.27248e-05	0.501799	0.00240947
			7.67383	6.27178e-05	0.501742	0.0024092
			7.67792	6.27221e-05	0.501777	0.00240936
			7.68202	6.27451e-05	0.501961	0.00241025
			7.68611	6.27911e-05	0.502329	0.00241202
			7.69021	6.28482e-05	0.502785	0.00241421
			7.6943	6.29101e-05	0.503281	0.00241659
			7.6984	6.29723e-05	0.503778	0.00241898
			7.70249	6.30304e-05	0.504243	0.00242121
			7.70659	6.30816e-05	0.504653	0.00242317
			7.71068	6.3124e-05	0.504992	0.0024248
			7.71478	6.31529e-05	0.505223	0.00242591
			7.71887	6.31722e-05	0.505377	0.00242665
			7.72297	6.31805e-05	0.505444	0.00242697
			7.72706	6.31777e-05	0.505421	0.00242686
			7.73116	6.31704e-05	0.505363	0.00242658
			7.73525	6.31592e-05	0.505273	0.00242615
			7.73935	6.31452e-05	0.505162	0.00242562
			7.74344	6.31324e-05	0.505059	0.00242512
			7.74753	6.31208e-05	0.504967	0.00242468
			7.75163	6.31199e-05	0.504959	0.00242464
			7.75572	6.31327e-05	0.505062	0.00242514
			7.75982	6.31569e-05	0.505256	0.00242607
			7.76391	6.31915e-05	0.505532	0.00242739
			7.76801	6.32306e-05	0.505845	0.0024289
			7.7721	6.32698e-05	0.506159	0.0024304
			7.7762	6.32993e-05	0.506394	0.00243154
			7.78029	6.33052e-05	0.506441	0.00243176
			7.78439	6.3288e-05	0.506304	0.0024311
			7.78848	6.32537e-05	0.506029	0.00242978
			7.79258	6.32032e-05	0.505625	0.00242784
			7.79667	6.31357e-05	0.505086	0.00242525
			7.80077	6.30551e-05	0.504441	0.00242216
			7.80486	6.29654e-05	0.503723	0.00241871
			7.80896	6.28736e-05	0.502989	0.00241518
			7.81305	6.27911e-05	0.502329	0.00241201
			7.81715	6.27271e-05	0.501817	0.00240956
			7.82124	6.27005e-05	0.501604	0.00240853
			7.82534	6.27075e-05	0.50166	0.0024088
			7.82943	6.27449e-05	0.501959	0.00241024
			7.83353	6.28101e-05	0.502481	0.00241275
			7.83762	6.28938e-05	0.50315	0.00241596
			7.84172	6.29812e-05	0.50385	0.00241932
			7.84581	6.30723e-05	0.504578	0.00242282
			7.84991	6.31578e-05	0.505262	0.0024261
			7.854	6.32292e-05	0.505833	0.00242884
			7.8581	6.32779e-05	0.506223	0.00243071
			7.86219	6.32989e-05	0.506391	0.00243152
			7.86629	6.32861e-05	0.506289	0.00243103
			7.87038	6.32498e-05	0.505998	0.00242963
			7.87448	6.3194e-05	0.505552	0.00242749
			7.87857	6.31243e-05	0.504994	0.00242481
			7.88267	6.30422e-05	0.504338	0.00242166
			7.88676	6.29524e-05	0.503619	0.00241821
			7.89086	6.28685e-05	0.502948	0.00241499
			7.89495	6.27987e-05	0.502389	0.00241231
			7.89905	6.27386e-05	0.501909	0.00241
			7.90314	6.26888e-05	0.501511	0.00240809
			7.90724	6.26451e-05	0.501161	0.00240641
			7.91133	6.2607e-05	0.500856	0.00240494
			7.91543	6.25738e-05	0.50059	0.00240367
			7.91952	6.25429e-05	0.500343	0.00240248
			7.92362	6.25058e-05	0.500047	0.00240106
			7.92771	6.24741e-05	0.499793	0.00239984
			7.9318	6.24527e-05	0.499621	0.00239901
			7.9359	6.2437e-05	0.499496	0.00239841
			7.93999	6.2429e-05	0.499432	0.00239811
			7.94409	6.24317e-05	0.499454	0.00239821
			7.94818	6.24483e-05	0.499586	0.00239884
			7.95228	6.24802e-05	0.499842	0.00240007
			7.95637	6.25148e-05	0.500119	0.0024014
			7.96047	6.25556e-05	0.500445	0.00240297
			7.96456	6.26043e-05	0.500835	0.00240484
			7.96866	6.26496e-05	0.501196	0.00240658
			7.97275	6.26851e-05	0.501481	0.00240794
			7.97685	6.2702e-05	0.501616	0.00240859
			7.98094	6.27073e-05	0.501659	0.0024088
			7.98504	6.27069e-05	0.501655	0.00240878
			7.98913	6.27021e-05	0.501616	0.00240859
			7.99323	6.26999e-05	0.501599	0.00240851
			7.99732	6.27068e-05	0.501655	0.00240878
			8.00142	6.27257e-05	0.501806	0.0024095
			8.00551	6.27593e-05	0.502075	0.00241079
			8.00961	6.28041e-05	0.502432	0.00241251
			8.0137	6.28665e-05	0.502932	0.00241491
			8.0178	6.29444e-05	0.503555	0.0024179
			8.02189	6.30324e-05	0.504259	0.00242128
			8.02599	6.31216e-05	0.504973	0.00242471
			8.03008	6.32071e-05	0.505657	0.002428
			8.03418	6.32915e-05	0.506332	0.00243124
			8.03827	6.33696e-05	0.506957	0.00243424
			8.04237	6.34404e-05	0.507524	0.00243696
			8.04646	6.35015e-05	0.508012	0.0024393
			8.05056	6.35373e-05	0.508298	0.00244068
			8.05465	6.35585e-05	0.508468	0.00244149
			8.05875	6.35714e-05	0.508571	0.00244199
			8.06284	6.35759e-05	0.508607	0.00244216
			8.06694	6.35819e-05	0.508655	0.00244239
			8.07103	6.35909e-05	0.508727	0.00244274
			8.07513	6.36043e-05	0.508835	0.00244325
			8.07922	6.3628e-05	0.509024	0.00244416
			8.08332	6.36613e-05	0.50929	0.00244544
			8.08741	6.37084e-05	0.509667	0.00244725
			8.09151	6.37671e-05	0.510137	0.00244951
			8.0956	6.38286e-05	0.510629	0.00245187
			8.0997	6.38964e-05	0.511171	0.00245447
			8.10379	6.3961e-05	0.511688	0.00245695
			8.10789	6.40153e-05	0.512122	0.00245904
			8.11198	6.40532e-05	0.512425	0.00246049
			8.11608	6.40733e-05	0.512586	0.00246127
			8.12017	6.40697e-05	0.512557	0.00246113
			8.12426	6.40559e-05	0.512447	0.0024606
			8.12836	6.40325e-05	0.51226	0.0024597
			8.13245	6.40034e-05	0.512027	0.00245858
			8.13655	6.39733e-05	0.511786	0.00245743
			8.14064	6.39394e-05	0.511515	0.00245612
			8.14474	6.39013e-05	0.51121	0.00245466
			8.14883	6.38612e-05	0.510889	0.00245312
			8.15293	6.38187e-05	0.510549	0.00245149
			8.15702	6.3768e-05	0.510144	0.00244954
			8.16112	6.37263e-05	0.50981	0.00244794
			8.16521	6.36877e-05	0.509502	0.00244646
			8.16931	6.36551e-05	0.509241	0.0024452
			8.1734	6.36233e-05	0.508986	0.00244398
			8.1775	6.35915e-05	0.508732	0.00244276
			8.18159	6.35508e-05	0.508406	0.0024412
			8.18569	6.35033e-05	0.508027	0.00243937
			8.18978	6.34628e-05	0.507703	0.00243782
			8.19388	6.34164e-05	0.507331	0.00243604
			8.19797	6.33621e-05	0.506897	0.00243395
			8.20207	6.32959e-05	0.506367	0.0024314
			8.20616	6.32139e-05	0.505711	0.00242826
			8.21026	6.31159e-05	0.504927	0.00242449
			8.21435	6.30059e-05	0.504047	0.00242027
			8.21845	6.28876e-05	0.5031	0.00241572
			8.22254	6.27615e-05	0.502092	0.00241088
			8.22664	6.26294e-05	0.501035	0.0024058
			8.23073	6.25071e-05	0.500057	0.0024011
			8.23483	6.23917e-05	0.499133	0.00239667
			8.23892	6.22868e-05	0.498294	0.00239264
			8.24302	6.22139e-05	0.497711	0.00238984
			8.24711	6.21708e-05	0.497367	0.00238819
			8.25121	6.21641e-05	0.497313	0.00238793
			8.2553	6.21968e-05	0.497574	0.00238918
			8.2594	6.22668e-05	0.498134	0.00239187
			8.26349	6.23704e-05	0.498963	0.00239585
			8.26759	6.25005e-05	0.500004	0.00240085
			8.27168	6.26473e-05	0.501178	0.00240649
			8.27578	6.27978e-05	0.502382	0.00241227
			8.27987	6.29424e-05	0.503539	0.00241783
			8.28397	6.30715e-05	0.504572	0.00242279
			8.28806	6.3183e-05	0.505464	0.00242707
			8.29216	6.32728e-05	0.506183	0.00243052
			8.29625	6.33424e-05	0.506739	0.00243319
			8.30035	6.33979e-05	0.507183	0.00243532
			8.30444	6.34417e-05	0.507534	0.00243701
			8.30853	6.34796e-05	0.507837	0.00243846
			8.31263	6.35229e-05	0.508184	0.00244013
			8.31672	6.3573e-05	0.508584	0.00244205
			8.32082	6.36264e-05	0.509011	0.0024441
			8.32491	6.3681e-05	0.509448	0.0024462
			8.32901	6.37287e-05	0.50983	0.00244803
			8.3331	6.37745e-05	0.510196	0.00244979
			8.3372	6.38167e-05	0.510534	0.00245141
			8.34129	6.38541e-05	0.510833	0.00245285
			8.34539	6.38866e-05	0.511092	0.00245409
			8.34948	6.39125e-05	0.5113	0.00245509
			8.35358	6.3935e-05	0.51148	0.00245595
			8.35767	6.39567e-05	0.511654	0.00245679
			8.36177	6.39742e-05	0.511793	0.00245746
			8.36586	6.399e-05	0.51192	0.00245807
			8.36996	6.40127e-05	0.512101	0.00245894
			8.37405	6.40396e-05	0.512317	0.00245997
			8.37815	6.4069e-05	0.512552	0.0024611
			8.38224	6.40985e-05	0.512788	0.00246224
			8.38634	6.41262e-05	0.51301	0.0024633
			8.39043	6.41518e-05	0.513215	0.00246428
			8.39453	6.41861e-05	0.513489	0.0024656
			8.39862	6.42263e-05	0.513811	0.00246715
			8.40272	6.42716e-05	0.514173	0.00246888
			8.40681	6.43224e-05	0.514579	0.00247083
			8.41091	6.43628e-05	0.514902	0.00247239
			8.415	6.44094e-05	0.515275	0.00247418
			8.4191	6.44766e-05	0.515813	0.00247676
			8.42319	6.45478e-05	0.516382	0.00247949
			8.42729	6.46222e-05	0.516978	0.00248235
			8.43138	6.50036e-05	0.520028	0.002497
			8.43548	6.6039e-05	0.528312	0.00253678
			8.43957	6.77137e-05	0.54171	0.00260111
			8.44367	7.00246e-05	0.560197	0.00268988
			8.44776	7.30606e-05	0.584485	0.0028065
			8.45186	7.68584e-05	0.614868	0.00295239
			8.45595	8.13813e-05	0.651051	0.00312613
			8.46005	8.65039e-05	0.692031	0.0033229
			8.46414	9.20285e-05	0.736228	0.00353512
			8.46824	9.76961e-05	0.781568	0.00375283
			8.47233	0.000103226	0.825808	0.00396525
			8.47643	0.000108359	0.86687	0.00416242
			8.48052	0.000112891	0.903129	0.00433652
			8.48462	0.000116697	0.93358	0.00448274
			8.48871	0.000119738	0.957902	0.00459953
			8.49281	0.000122044	0.976352	0.00468811
			8.4969	0.000123698	0.989582	0.00475164
			8.50099	0.000124825	0.998597	0.00479493
			8.50509	0.000125547	1.00437	0.00482266
			8.50918	0.000125975	1.0078	0.00483912
			8.51328	0.000126203	1.00962	0.00484786
			8.51737	0.000126299	1.01039	0.00485155
			8.52147	0.000126315	1.01052	0.00485218
			8.52556	0.000126304	1.01043	0.00485176
			8.52966	0.000126284	1.01027	0.00485098
			8.53375	0.000126272	1.01018	0.00485054
			8.53785	0.000126279	1.01023	0.00485078
			8.54194	0.000126304	1.01043	0.00485177
			8.54604	0.000126354	1.01083	0.00485367
			8.55013	0.000126416	1.01133	0.00485606
			8.55423	0.000126489	1.01191	0.00485886
			8.55832	0.000126575	1.0126	0.00486216
			8.56242	0.000126659	1.01327	0.00486541
			8.56651	0.000126735	1.01388	0.00486829
			8.57061	0.000126795	1.01436	0.00487062
			8.5747	0.000126841	1.01473	0.0048724
			8.5788	0.000126873	1.01498	0.0048736
			8.58289	0.000126892	1.01514	0.00487436
			8.58699	0.000126904	1.01523	0.00487481
			8.59108	0.000126912	1.0153	0.00487511
			8.59518	0.000126924	1.01539	0.00487556
			8.59927	0.000126944	1.01555	0.00487635
			8.60337	0.000126976	1.01581	0.00487757
			8.60746	0.000127016	1.01613	0.0048791
			8.61156	0.000127063	1.01651	0.00488092
			8.61565	0.000127115	1.01692	0.0048829
			8.61975	0.000127159	1.01727	0.0048846
			8.62384	0.000127198	1.01759	0.00488611
			8.62794	0.000127235	1.01788	0.00488752
			8.63203	0.000127264	1.01811	0.00488863
			8.63613	0.000127283	1.01826	0.00488935
			8.64022	0.000127291	1.01832	0.00488965
			8.64432	0.000127294	1.01835	0.00488978
			8.64841	0.000127315	1.01852	0.00489058
			8.65251	0.000127868	1.02295	0.00491185
			8.6566	0.000128941	1.03153	0.00495306
			8.6607	0.000130724	1.04579	0.00502154
			8.66479	0.000133177	1.06541	0.00511576
			8.66889	0.000136381	1.09105	0.00523885
			8.67298	0.000140357	1.12286	0.00539159
			8.67708	0.000145048	1.16038	0.00557176
			8.68117	0.000150308	1.20246	0.00577383
			8.68526	0.000155918	1.24734	0.00598933
			8.68936	0.000161602	1.29281	0.00620766
			8.69345	0.000167075	1.3366	0.0064179
			8.69755	0.000172095	1.37676	0.00661075
			8.70164	0.00017647	1.41176	0.00677878
			8.70574	0.000180089	1.44071	0.00691782
			8.70983	0.000182932	1.46345	0.00702701
			8.71393	0.000185061	1.48049	0.00710879
			8.71802	0.000186571	1.49256	0.0071668
			8.72212	0.000187584	1.50067	0.00720573
			8.72621	0.000188228	1.50583	0.00723048
			8.73031	0.000188605	1.50884	0.00724495
			8.7344	0.000188813	1.5105	0.00725293
			8.7385	0.000188915	1.51132	0.00725685
			8.74259	0.000188957	1.51166	0.00725847
			8.74669	0.000188963	1.5117	0.00725868
			8.75078	0.000188946	1.51157	0.00725805
			8.75488	0.000188914	1.51131	0.0072568
			8.75897	0.00018887	1.51096	0.00725511
			8.76307	0.000188815	1.51052	0.00725301
			8.76716	0.000188757	1.51006	0.00725078
			8.77126	0.0001887	1.5096	0.00724858
			8.77535	0.000188644	1.50915	0.00724644
			8.77945	0.000188591	1.50873	0.0072444
			8.78354	0.000188532	1.50826	0.00724215
			8.78764	0.000188475	1.5078	0.00723995
			8.79173	0.000188417	1.50734	0.00723774
			8.79583	0.000188354	1.50683	0.00723529
			8.79992	0.000188282	1.50625	0.00723253
			8.80402	0.000188224	1.50579	0.0072303
			8.80811	0.000188185	1.50548	0.0072288
			8.81221	0.000188161	1.50529	0.00722789
			8.8163	0.000188158	1.50527	0.00722779
			8.8204	0.000188178	1.50542	0.00722854
			8.82449	0.000188255	1.50604	0.00723149
			8.82859	0.000188891	1.51113	0.00725594
			8.83268	0.000190053	1.52043	0.00730058
			8.83678	0.000191916	1.53532	0.00737211
			8.84087	0.000194441	1.55553	0.00746912
			8.84497	0.000197701	1.58161	0.00759436
			8.84906	0.000201704	1.61363	0.00774812
			8.85316	0.000206389	1.65111	0.00792808
			8.85725	0.000211608	1.69286	0.00812855
			8.86135	0.000217149	1.73719	0.0083414
			8.86544	0.00022275	1.782	0.00855656
			8.86954	0.000228136	1.82509	0.00876346
			8.87363	0.000233085	1.86468	0.00895356
			8.87772	0.000237404	1.89923	0.00911947
			8.88182	0.000240992	1.92793	0.00925729
			8.88591	0.00024383	1.95064	0.00936631
			8.89001	0.00024596	1.96768	0.00944815
			8.8941	0.000247502	1.98001	0.00950736
			8.8982	0.000248569	1.98855	0.00954836
			8.90229	0.000249286	1.99429	0.00957591
			8.90639	0.000249774	1.9982	0.00959466
			8.91048	0.000250113	2.0009	0.00960766
			8.91458	0.000250365	2.00292	0.00961736
			8.91867	0.000250722	2.00578	0.00963106
			8.92277	0.000251644	2.01315	0.00966648
			8.92686	0.000253075	2.0246	0.00972146
			8.93096	0.000255184	2.04147	0.00980247
			8.93505	0.000257962	2.06369	0.00990917
			8.93915	0.000261469	2.09175	0.0100439
			8.94324	0.000265707	2.12566	0.0102067
			8.94734	0.000270593	2.16475	0.0103944
			8.95143	0.000275964	2.20771	0.0106007
			8.95553	0.000281597	2.25278	0.0108171
			8.95962	0.000287233	2.29786	0.0110336
			8.96372	0.000292613	2.3409	0.0112402
			8.96781	0.000297512	2.3801	0.0114284
			8.97191	0.00030177	2.41416	0.011592
			8.976	0.000305303	2.44242	0.0117277
			8.9801	0.00030811	2.46488	0.0118355
			8.98419	0.000310246	2.48197	0.0119176
			8.98829	0.000311818	2.49454	0.011978
			8.99238	0.000313446	2.50757	0.0120405
			8.99648	0.000315222	2.52178	0.0121087
			9.00057	0.000317425	2.5394	0.0121933
			9.00467	0.000320092	2.56074	0.0122958
			9.00876	0.000323372	2.58698	0.0124218
			9.01286	0.000327334	2.61867	0.012574
			9.01695	0.000331955	2.65564	0.0127515
			9.02105	0.000337123	2.69698	0.01295
			9.02514	0.000342638	2.74111	0.0131619
			9.02924	0.000348252	2.78601	0.0133775
			9.03333	0.000353704	2.82963	0.0135869
			9.03743	0.000358744	2.86995	0.0137805
			9.04152	0.000363181	2.90545	0.013951
			9.04562	0.0003669	2.9352	0.0140938
			9.04971	0.000370163	2.96131	0.0142192
			9.05381	0.000373384	2.98707	0.0143429
			9.0579	0.000376527	3.01222	0.0144637
			9.06199	0.000379792	3.03834	0.0145891
			9.06609	0.000383405	3.06724	0.0147278
			9.07018	0.000387487	3.0999	0.0148847
			9.07428	0.000392104	3.13683	0.015062
			9.07837	0.000397214	3.17771	0.0152583
			9.08247	0.000402684	3.22147	0.0154684
			9.08656	0.000408302	3.26641	0.0156842
			9.09066	0.000413818	3.31054	0.0158961
			9.09475	0.000418989	3.35191	0.0160947
			9.09885	0.000423622	3.38898	0.0162727
			9.10294	0.000427942	3.42354	0.0164387
			9.10704	0.000432223	3.45779	0.0166031
			9.11113	0.000436337	3.4907	0.0167611
			9.11523	0.00044049	3.52392	0.0169207
			9.11932	0.000444841	3.55873	0.0170878
			9.12342	0.000449536	3.59629	0.0172682
			9.12751	0.000454641	3.63712	0.0174643
			9.13161	0.00046012	3.68096	0.0176748
			9.1357	0.000465828	3.72662	0.017894
			9.1398	0.000471569	3.77255	0.0181145
			9.14389	0.000477114	3.81691	0.0183275
			9.14799	0.000482223	3.85778	0.0185238
			9.15208	0.000486709	3.89367	0.0186961
			9.15618	0.000490459	3.92367	0.0188401
			9.16027	0.000493787	3.9503	0.018968
			9.16437	0.000497091	3.97673	0.0190949
			9.16846	0.000500312	4.0025	0.0192186
			9.17256	0.000503664	4.02931	0.0193474
			9.17665	0.00050735	4.0588	0.019489
			9.18075	0.000511524	4.09219	0.0196493
			9.18484	0.000516229	4.12983	0.0198301
			9.18894	0.000521419	4.17135	0.0200294
			9.19303	0.000526942	4.21554	0.0202416
			9.19713	0.000532578	4.26062	0.0204581
			9.20122	0.000538074	4.30459	0.0206692
			9.20532	0.000543189	4.34551	0.0208657
			9.20941	0.000547727	4.38182	0.02104
			9.21351	0.000551568	4.41254	0.0211875
			9.2176	0.000554668	4.43734	0.0213066
			9.2217	0.000557068	4.45654	0.0213988
			9.22579	0.000558912	4.4713	0.0214697
			9.22989	0.00056081	4.48648	0.0215426
			9.23398	0.000562838	4.5027	0.0216205
			9.23808	0.000565167	4.52134	0.0217099
			9.24217	0.000567972	4.54378	0.0218177
			9.24627	0.000571409	4.57127	0.0219497
			9.25036	0.000575512	4.6041	0.0221073
			9.25445	0.000580254	4.64204	0.0222895
			9.25855	0.000585518	4.68414	0.0224917
			9.26264	0.000591102	4.72882	0.0227062
			9.26674	0.000596757	4.77406	0.0229234
			9.27083	0.000602221	4.81777	0.0231333
			9.27493	0.000607259	4.85807	0.0233268
			9.27902	0.00061169	4.89352	0.023497
			9.28312	0.000615405	4.92324	0.0236397
			9.28721	0.000618376	4.94701	0.0237539
			9.29131	0.000620638	4.9651	0.0238408
			9.2954	0.000622303	4.97842	0.0239047
			9.2995	0.000623468	4.98774	0.0239495
			9.30359	0.00062425	4.994	0.0239795
			9.30769	0.000624756	4.99805	0.0239989
			9.31178	0.000625076	5.00061	0.0240112
			9.31588	0.000625275	5.0022	0.0240189
			9.31997	0.000625411	5.00329	0.0240241
			9.32407	0.000625515	5.00412	0.0240281
			9.32816	0.000625606	5.00485	0.0240316
			9.33226	0.000625693	5.00555	0.024035
			9.33635	0.000625817	5.00653	0.0240397
			9.34045	0.000626479	5.01183	0.0240651
			9.34454	0.000627895	5.02316	0.0241195
			9.34864	0.000629889	5.03911	0.0241961
			9.35273	0.00063257	5.06056	0.0242991
			9.35683	0.000636008	5.08807	0.0244312
			9.36092	0.000640208	5.12167	0.0245925
			9.36502	0.000645098	5.16078	0.0247804
			9.36911	0.000650512	5.2041	0.0249883
			9.37321	0.000656213	5.2497	0.0252073
			9.3773	0.000661915	5.29532	0.0254264
			9.3814	0.00066734	5.33872	0.0256348
			9.38549	0.000672243	5.37795	0.0258231
			9.38959	0.000676454	5.41163	0.0259848
			9.39368	0.000679882	5.43905	0.0261165
			9.39778	0.000682535	5.46028	0.0262184
			9.40187	0.000684481	5.47585	0.0262932
			9.40597	0.000685832	5.48666	0.0263451
			9.41006	0.000686712	5.4937	0.0263789
			9.41416	0.000687242	5.49794	0.0263993
			9.41825	0.000687531	5.50025	0.0264103
			9.42235	0.000687677	5.50141	0.0264159
			9.42644	0.00068773	5.50184	0.026418
			9.43054	0.000687734	5.50187	0.0264182
			9.43463	0.000687724	5.50179	0.0264178
			9.43873	0.000687717	5.50173	0.0264175
			9.44282	0.000687715	5.50172	0.0264174
			9.44691	0.000687721	5.50177	0.0264177
			9.45101	0.000687739	5.50191	0.0264183
			9.4551	0.000687761	5.50209	0.0264192
			9.4592	0.000687779	5.50223	0.0264199
			9.46329	0.000687774	5.50219	0.0264197
			9.46739	0.000687756	5.50205	0.026419
			9.47148	0.000687725	5.5018	0.0264178
			9.47558	0.000687677	5.50142	0.026416
			9.47967	0.00068761	5.50088	0.0264134
			9.48377	0.000687531	5.50025	0.0264104
			9.48786	0.000687435	5.49948	0.0264067
			9.49196	0.000687335	5.49868	0.0264028
			9.49605	0.000687244	5.49795	0.0263993
			9.50015	0.000687168	5.49734	0.0263964
			9.50424	0.000687117	5.49693	0.0263944
			9.50834	0.000687088	5.49671	0.0263933
			9.51243	0.00068708	5.49664	0.026393
			9.51653	0.00068709	5.49672	0.0263934
			9.52062	0.000687097	5.49677	0.0263937
			9.52472	0.000687118	5.49695	0.0263945
			9.52881	0.000687145	5.49716	0.0263955
			9.53291	0.000687174	5.49739	0.0263966
			9.537	0.000687196	5.49757	0.0263975
			9.5411	0.000687227	5.49781	0.0263987
			9.54519	0.000687252	5.49801	0.0263996
			9.54929	0.00068727	5.49816	0.0264003
			9.55338	0.000687281	5.49825	0.0264008
			9.55748	0.000687292	5.49834	0.0264012
			9.56157	0.000687309	5.49847	0.0264018
			9.56567	0.000687334	5.49867	0.0264028
			9.56976	0.00068737	5.49896	0.0264042
			9.57386	0.000687416	5.49933	0.0264059
			9.57795	0.000687471	5.49976	0.026408
			9.58205	0.000687528	5.50022	0.0264102
			9.58614	0.000687587	5.50069	0.0264125
			9.59024	0.000687639	5.50111	0.0264145
			9.59433	0.000687682	5.50146	0.0264162
			9.59843	0.000687713	5.50171	0.0264174
			9.60252	0.000687731	5.50184	0.026418
			9.60662	0.000687732	5.50185	0.0264181
			9.61071	0.000687716	5.50173	0.0264174
			9.61481	0.000687683	5.50146	0.0264162
			9.6189	0.000687631	5.50105	0.0264142
			9.623	0.000687573	5.50058	0.026412
			9.62709	0.000687509	5.50007	0.0264095
			9.63118	0.000687443	5.49954	0.026407
			9.63528	0.000687377	5.49902	0.0264044
			9.63937	0.000687316	5.49853	0.0264021
			9.64347	0.000687267	5.49814	0.0264002
			9.64756	0.000687237	5.4979	0.0263991
			9.65166	0.000687232	5.49786	0.0263989
			9.65575	0.000687382	5.49905	0.0264046
			9.65985	0.000688144	5.50515	0.0264339
			9.66394	0.000689468	5.51575	0.0264848
			9.66804	0.00069142	5.53136	0.0265597
			9.67213	0.000694076	5.55261	0.0266618
			9.67623	0.000697508	5.58006	0.0267936
			9.68032	0.000701697	5.61358	0.0269545
			9.68442	0.000706565	5.65252	0.0271415
			9.68851	0.000711954	5.69563	0.0273485
			9.69261	0.000717633	5.74106	0.0275667
			9.6967	0.000723338	5.78671	0.0277858
			9.7008	0.000728808	5.83046	0.0279959
			9.70489	0.000733809	5.87047	0.028188
			9.70899	0.000738171	5.90537	0.0283556
			9.71308	0.0007418	5.9344	0.028495
			9.71718	0.000744678	5.95743	0.0286056
			9.72127	0.000746855	5.97484	0.0286892
			9.72537	0.000748409	5.98728	0.0287489
			9.72946	0.000749458	5.99566	0.0287891
			9.73356	0.000750123	6.00098	0.0288147
			9.73765	0.000750507	6.00405	0.0288295
			9.74175	0.000750698	6.00558	0.0288368
			9.74584	0.000750763	6.00611	0.0288393
			9.74994	0.000750754	6.00603	0.0288389
			9.75403	0.000750704	6.00563	0.028837
			9.75813	0.000750645	6.00516	0.0288348
			9.76222	0.000750593	6.00475	0.0288328
			9.76632	0.000750556	6.00445	0.0288313
			9.77041	0.000750539	6.00431	0.0288307
			9.77451	0.000750545	6.00436	0.0288309
			9.7786	0.000750573	6.00458	0.028832
			9.7827	0.000750599	6.00479	0.028833
			9.78679	0.000750619	6.00496	0.0288338
			9.79089	0.000750636	6.00509	0.0288344
			9.79498	0.000750638	6.00511	0.0288345
			9.79908	0.000750616	6.00493	0.0288337
			9.80317	0.000750565	6.00452	0.0288317
			9.80727	0.000750464	6.00371	0.0288278
			9.81136	0.000750305	6.00244	0.0288217
			9.81546	0.000750054	6.00043	0.0288121
			9.81955	0.000749225	5.9938	0.0287802
			9.82364	0.000747666	5.98132	0.0287203
			9.82774	0.00074553	5.96424	0.0286383
			9.83183	0.000742721	5.94177	0.0285304
			9.83593	0.00073918	5.91344	0.0283944
			9.84002	0.000734916	5.87933	0.0282305
			9.84412	0.000730014	5.84011	0.0280423
			9.84821	0.000724643	5.79715	0.0278359
			9.85231	0.000719037	5.7523	0.0276206
			9.8564	0.000713495	5.70796	0.0274077
			9.8605	0.000708268	5.66614	0.0272069
			9.86459	0.000703581	5.62865	0.0270269
			9.86869	0.00069959	5.59672	0.0268736
			9.87278	0.000696356	5.57085	0.0267493
			9.87688	0.000693865	5.55092	0.0266537
			9.88097	0.000692045	5.53636	0.0265837
			9.88507	0.000690777	5.52622	0.026535
			9.88916	0.000689933	5.51946	0.0265026
			9.89326	0.000689387	5.5151	0.0264816
			9.89735	0.000689036	5.51229	0.0264681
			9.90145	0.000688799	5.5104	0.0264591
			9.90554	0.000688626	5.50901	0.0264524
			9.90964	0.000688485	5.50788	0.026447
			9.91373	0.000688362	5.50689	0.0264423
			9.91783	0.000688235	5.50588	0.0264374
			9.92192	0.000688133	5.50506	0.0264335
			9.92602	0.000688063	5.5045	0.0264308
			9.93011	0.000688016	5.50413	0.026429
			9.93421	0.000687992	5.50394	0.0264281
			9.9383	0.000687987	5.5039	0.0264279
			9.9424	0.000687995	5.50396	0.0264282
			9.94649	0.000688022	5.50417	0.0264292
			9.95059	0.00068806	5.50448	0.0264307
			9.95468	0.000688104	5.50483	0.0264323
			9.95878	0.000688136	5.50509	0.0264336
			9.96287	0.000688155	5.50524	0.0264343
			9.96697	0.000688156	5.50524	0.0264343
			9.97106	0.000688114	5.50491	0.0264327
			9.97516	0.000688045	5.50436	0.0264301
			9.97925	0.000687966	5.50373	0.0264271
			9.98335	0.000687874	5.50299	0.0264235
			9.98744	0.000687779	5.50223	0.0264199
			9.99154	0.000688141	5.50513	0.0264338
			9.99563	0.000689281	5.51425	0.0264776
			9.99973	0.000691025	5.5282	0.0265446
			10.0038	0.000693491	5.54793	0.0266393
			10.0079	0.000696759	5.57407	0.0267648
			10.012	0.000700854	5.60683	0.0269221
			10.0161	0.000705715	5.64572	0.0271089
			10.0202	0.000711187	5.6895	0.027319
			10.0243	0.000717036	5.73629	0.0275437
			10.0284	0.000722981	5.78385	0.0277721
			10.0325	0.000728734	5.82987	0.0279931
			10.0366	0.000734516	5.87613	0.0282152
			10.0407	0.000740398	5.92319	0.0284412
			10.0448	0.000746094	5.96876	0.02866
			10.0489	0.000751684	6.01348	0.0288747
			10.053	0.000757302	6.05842	0.0290905
			10.0571	0.000763288	6.10631	0.0293204
			10.0611	0.000770123	6.16099	0.029583
			10.0652	0.00077769	6.22152	0.0298737
			10.0693	0.000786034	6.28827	0.0301942
			10.0734	0.00079498	6.35984	0.0305378
			10.0775	0.000804882	6.43906	0.0309182
			10.0816	0.000815758	6.52606	0.031336
			10.0857	0.000827161	6.61729	0.031774
			10.0898	0.000839185	6.71348	0.0322359
			10.0939	0.000852048	6.81638	0.03273
			10.098	0.000865596	6.92477	0.0332504
			10.1021	0.000879834	7.03867	0.0337973
			10.1062	0.000894981	7.15985	0.0343792
			10.1103	0.00091083	7.28664	0.034988
			10.1144	0.000927564	7.42052	0.0356308
			10.1185	0.000945253	7.56203	0.0363103
			10.1226	0.000963731	7.70985	0.0370201
			10.1267	0.000983173	7.86539	0.0377669
			10.1308	0.00100354	8.02831	0.0385492
			10.1349	0.00102489	8.19914	0.0393695
			10.139	0.00104727	8.37816	0.0402291
			10.143	0.00107065	8.56521	0.0411273
			10.1471	0.00109504	8.76034	0.0420642
			10.1512	0.00112042	8.96334	0.043039
			10.1553	0.00114687	9.17494	0.044055
			10.1594	0.00117429	9.39436	0.0451086
			10.1635	0.00120281	9.62249	0.046204
			10.1676	0.00123244	9.85952	0.0473421
			10.1717	0.00126302	10.1041	0.0485167
			10.1758	0.00129479	10.3583	0.0497372
			10.1799	0.00132778	10.6222	0.0510043
			10.184	0.00136175	10.894	0.0523095
			10.1881	0.00139687	11.175	0.0536586
			10.1922	0.00143326	11.4661	0.0550563
			10.1963	0.00147081	11.7665	0.0564988
			10.2004	0.00150948	12.0758	0.0579841
			10.2045	0.0015493	12.3944	0.0595136
			10.2086	0.00159037	12.723	0.0610914
			10.2127	0.00163263	13.061	0.0627146
			10.2168	0.00167608	13.4087	0.0643838
			10.2208	0.00172079	13.7663	0.0661014
			10.2249	0.00176668	14.1335	0.0678641
			10.229	0.00181374	14.5099	0.0696717
			10.2331	0.00186201	14.8961	0.071526
			10.2372	0.00191148	15.2918	0.0734263
			10.2413	0.00196212	15.697	0.0753715
			10.2454	0.00201394	16.1115	0.0773621
			10.2495	0.0020669	16.5352	0.0793966
			10.2536	0.00212091	16.9672	0.081471
			10.2577	0.00217596	17.4077	0.0835857
			10.2618	0.00223211	17.8569	0.0857427
			10.2659	0.00228929	18.3143	0.0879392
			10.27	0.00234745	18.7796	0.0901734
			10.2741	0.00240665	19.2532	0.0924474
			10.2782	0.00246688	19.735	0.0947609
			10.2823	0.00252809	20.2247	0.0971122
			10.2864	0.00259027	20.7222	0.099501
			10.2905	0.00265335	21.2268	0.101924
			10.2946	0.00271734	21.7387	0.104382
			10.2987	0.00278231	22.2585	0.106878
			10.3027	0.0028482	22.7856	0.109409
			10.3068	0.00291493	23.3194	0.111972
			10.3109	0.00298244	23.8595	0.114565
			10.315	0.00305082	24.4065	0.117192
			10.3191	0.00312007	24.9606	0.119852
			10.3232	0.00319017	25.5214	0.122545
			10.3273	0.00326105	26.0884	0.125268
			10.3314	0.00333259	26.6607	0.128016
			10.3355	0.00340479	27.2383	0.130789
			10.3396	0.00347763	27.821	0.133587
			10.3437	0.00355099	28.4079	0.136405
			10.3478	0.0036248	28.9984	0.13924
			10.3519	0.00369903	29.5922	0.142092
			10.356	0.00377375	30.19	0.144962
			10.3601	0.0038489	30.7912	0.147849
			10.3642	0.00392438	31.3951	0.150749
			10.3683	0.00400022	32.0018	0.153662
			10.3724	0.00407656	32.6125	0.156594
			10.3765	0.00415338	33.2271	0.159545
			10.3806	0.00423061	33.8449	0.162512
			10.3846	0.00430839	34.4671	0.165499
			10.3887	0.00438673	35.0938	0.168509
			10.3928	0.00446559	35.7247	0.171538
			10.3969	0.00454501	36.3601	0.174589
			10.401	0.00462496	36.9996	0.17766
			10.4051	0.00470544	37.6435	0.180751
			10.4092	0.00478647	38.2918	0.183864
			10.4133	0.00486806	38.9445	0.186998
			10.4174	0.00495027	39.6021	0.190156
			10.4215	0.00503307	40.2646	0.193337
			10.4256	0.00511637	40.931	0.196537
			10.4297	0.00520023	41.6018	0.199758
			10.4338	0.00528464	42.2771	0.203001
			10.4379	0.00536961	42.9569	0.206264
			10.442	0.00545515	43.6412	0.209551
			10.4461	0.00554132	44.3306	0.21286
			10.4502	0.00562828	45.0262	0.216201
			10.4543	0.0057161	45.7288	0.219574
			10.4584	0.00580488	46.4391	0.222985
			10.4624	0.00589471	47.1577	0.226435
			10.4665	0.00598572	47.8858	0.229931
			10.4706	0.00607807	48.6246	0.233479
			10.4747	0.00617193	49.3755	0.237084
			10.4788	0.00626739	50.1391	0.240751
			10.4829	0.00636445	50.9156	0.24448
			10.487	0.00646325	51.706	0.248275
			10.4911	0.00656378	52.5102	0.252137
			10.4952	0.00666612	53.329	0.256068
			10.4993	0.00677046	54.1637	0.260076
			10.5034	0.00687691	55.0153	0.264165
			10.5075	0.00698558	55.8846	0.268339
			10.5116	0.00709661	56.7729	0.272604
			10.5157	0.00721016	57.6813	0.276966
			10.5198	0.00732632	58.6106	0.281428
			10.5239	0.00744525	59.562	0.285997
			10.528	0.00756699	60.5359	0.290673
			10.5321	0.00769153	61.5323	0.295457
			10.5362	0.00781888	62.551	0.300349
			10.5403	0.00794902	63.5921	0.305348
			10.5443	0.00808198	64.6558	0.310456
			10.5484	0.00821775	65.742	0.315671
			10.5525	0.00835638	66.851	0.320996
			10.5566	0.0084979	67.9832	0.326432
			10.5607	0.00864236	69.1389	0.331982
			10.5648	0.00878983	70.3186	0.337646
			10.5689	0.00894047	71.5237	0.343433
			10.573	0.00909431	72.7545	0.349343
			10.5771	0.00925138	74.0111	0.355376
			10.5812	0.00941188	75.295	0.361541
			10.5853	0.00957578	76.6062	0.367837
			10.5894	0.00974295	77.9436	0.374259
			10.5935	0.00991337	79.307	0.380806
			10.5976	0.010087	80.6963	0.387477
			10.6017	0.0102637	82.1096	0.394263
			10.6058	0.0104431	83.5449	0.401155
			10.6099	0.0106253	85.0028	0.408155
			10.614	0.0108103	86.4823	0.415259
			10.6181	0.0109976	87.9809	0.422455
			10.6221	0.0111873	89.4982	0.42974
			10.6262	0.0113792	91.0335	0.437112
			10.6303	0.0115734	92.5869	0.444571
			10.6344	0.0117698	94.1582	0.452116
			10.6385	0.0119683	95.7465	0.459743
			10.6426	0.0121689	97.3514	0.467449
			10.6467	0.0123717	98.9737	0.475238
			10.6508	0.0125766	100.613	0.48311
			10.6549	0.0127836	102.268	0.491059
			10.659	0.0129925	103.94	0.499087
			10.6631	0.0132035	105.628	0.50719
			10.6672	0.0134163	107.33	0.515364
			10.6713	0.0136308	109.046	0.523603
			10.6754	0.0138468	110.774	0.5319
			10.6795	0.0140642	112.514	0.540254
			10.6836	0.0142831	114.265	0.54866
			10.6877	0.0145032	116.026	0.557116
			10.6918	0.0147245	117.796	0.565616
			10.6959	0.0149468	119.574	0.574156
			10.7	0.0151701	121.361	0.582733
			10.704	0.0153943	123.155	0.591347
			10.7081	0.0156194	124.955	0.599992
			10.7122	0.0158451	126.761	0.608664
			10.7163	0.0160716	128.572	0.617362
			10.7204	0.0162986	130.389	0.626083
			10.7245	0.0165261	132.209	0.634823
			10.7286	0.0167539	134.031	0.643572
			10.7327	0.0169818	135.855	0.652329
			10.7368	0.0172097	137.678	0.661083
			10.7409	0.0174375	139.5	0.669831
			10.745	0.017665	141.32	0.67857
			10.7491	0.017892	143.136	0.687291
			10.7532	0.0181185	144.948	0.69599
			10.7573	0.0183443	146.754	0.704665
			10.7614	0.0185693	148.555	0.713309
			10.7655	0.0187934	150.347	0.721918
			10.7696	0.0190166	152.133	0.73049
			10.7737	0.0192387	153.909	0.73902
			10.7778	0.0194595	155.676	0.747503
			10.7818	0.0196789	157.431	0.755932
			10.7859	0.0198969	159.175	0.764304
			10.79	0.0201132	160.906	0.772615
			10.7941	0.0203277	162.621	0.780853
			10.7982	0.0205399	164.319	0.789005
			10.8023	0.0207496	165.997	0.79706
			10.8064	0.0209569	167.655	0.805022
			10.8105	0.0211614	169.291	0.812879
			10.8146	0.0213631	170.905	0.820627
			10.8187	0.0215618	172.495	0.828262
			10.8228	0.0217574	174.059	0.835775
			10.8269	0.0219498	175.599	0.843165
			10.831	0.022139	177.112	0.850431
			10.8351	0.0223248	178.598	0.857568
			10.8392	0.0225072	180.058	0.864576
			10.8433	0.0226862	181.489	0.871451
			10.8474	0.0228616	182.893	0.878191
			10.8515	0.0230334	184.268	0.884791
			10.8556	0.0232014	185.611	0.891243
			10.8597	0.0233653	186.923	0.897541
			10.8637	0.0235251	188.201	0.903678
			10.8678	0.0236806	189.444	0.909649
			10.8719	0.0238315	190.652	0.915446
			10.876	0.0239777	191.822	0.921064
			10.8801	0.0241192	192.953	0.926497
			10.8842	0.0242557	194.046	0.931742
			10.8883	0.0243872	195.098	0.936795
			10.8924	0.0245138	196.11	0.941657
			10.8965	0.0246354	197.083	0.946327
			10.9006	0.0247521	198.017	0.95081
			10.9047	0.0248638	198.911	0.955102
			10.9088	0.0249706	199.765	0.959204
			10.9129	0.0250725	200.58	0.963118
			10.917	0.0251695	201.356	0.966843
			10.9211	0.0252616	202.093	0.970381
			10.9252	0.0253487	202.79	0.973728
			10.9293	0.0254309	203.447	0.976885
			10.9334	0.0255081	204.064	0.979849
			10.9375	0.02558	204.64	0.982613
			10.9416	0.0256469	205.175	0.985183
			10.9456	0.0257084	205.668	0.987547
			10.9497	0.0257646	206.117	0.989703
			10.9538	0.0258152	206.522	0.991647
			10.9579	0.0258603	206.882	0.99338
			10.962	0.0259	207.2	0.994903
			10.9661	0.0259342	207.473	0.996218
			10.9702	0.0259632	207.705	0.997331
			10.9743	0.025987	207.896	0.998248
			10.9784	0.0260057	208.046	0.998965
			10.9825	0.0260195	208.156	0.999494
			10.9866	0.0260284	208.227	0.999838
			10.9907	0.0260326	208.261	1
			10.9948	0.0260324	208.259	0.99999
			10.9989	0.0260275	208.22	0.999802
			11.003	0.0260179	208.143	0.999434
			11.0071	0.0260037	208.03	0.998889
			11.0112	0.025985	207.88	0.998169
			11.0153	0.0259616	207.693	0.997272
			11.0194	0.0259337	207.469	0.996198
			11.0234	0.0259011	207.209	0.994948
			11.0275	0.0258641	206.913	0.993526
			11.0316	0.0258228	206.583	0.991941
			11.0357	0.0257773	206.218	0.99019
			11.0398	0.0257275	205.82	0.988279
			11.0439	0.0256739	205.391	0.986219
			11.048	0.0256164	204.931	0.984009
			11.0521	0.0255549	204.439	0.981649
			11.0562	0.0254897	203.917	0.979143
			11.0603	0.0254207	203.366	0.976495
			11.0644	0.0253482	202.785	0.973708
			11.0685	0.0252719	202.176	0.970779
			11.0726	0.0251922	201.537	0.967714
			11.0767	0.025109	200.872	0.96452
			11.0808	0.0250225	200.18	0.961198
			11.0849	0.0249328	199.463	0.957752
			11.089	0.0248399	198.72	0.954185
			11.0931	0.0247439	197.951	0.950495
			11.0972	0.0246447	197.157	0.946684
			11.1013	0.0245426	196.341	0.942762
			11.1053	0.0244377	195.501	0.938732
			11.1094	0.02433	194.64	0.934596
			11.1135	0.0242197	193.757	0.930358
			11.1176	0.0241067	192.854	0.926018
			11.1217	0.0239911	191.929	0.921577
			11.1258	0.023873	190.984	0.91704
			11.1299	0.0237524	190.02	0.91241
			11.134	0.0236295	189.036	0.907689
			11.1381	0.0235043	188.035	0.902879
			11.1422	0.0233768	187.015	0.897982
			11.1463	0.0232471	185.977	0.892998
			11.1504	0.0231151	184.921	0.887929
			11.1545	0.0229811	183.849	0.88278
			11.1586	0.0228451	182.761	0.877557
			11.1627	0.0227072	181.658	0.872259
			11.1668	0.0225675	180.54	0.866891
			11.1709	0.0224261	179.409	0.86146
			11.175	0.0222831	178.265	0.855967
			11.1791	0.0221385	177.108	0.850415
			11.1831	0.0219926	175.941	0.844808
			11.1872	0.0218453	174.762	0.839149
			11.1913	0.0216966	173.573	0.833438
			11.1954	0.0215466	172.373	0.827675
			11.1995	0.0213953	171.162	0.821863
			11.2036	0.0212427	169.942	0.816004
			11.2077	0.0210889	168.711	0.810095
			11.2118	0.0209338	167.471	0.804138
			11.2159	0.0207776	166.221	0.798138
			11.22	0.0206203	164.962	0.792095
			11.2241	0.020462	163.696	0.786013
			11.2282	0.0203028	162.422	0.779897
			11.2323	0.0201426	161.141	0.773744
			11.2364	0.0199816	159.853	0.767561
			11.2405	0.0198201	158.561	0.761356
			11.2446	0.0196581	157.265	0.755132
			11.2487	0.0194957	155.965	0.748893
			11.2528	0.0193329	154.663	0.742642
			11.2569	0.01917	153.36	0.736383
			11.261	0.0190069	152.055	0.730116
			11.265	0.0188436	150.749	0.723844
			11.2691	0.0186801	149.441	0.717565
			11.2732	0.0185163	148.131	0.711273
			11.2773	0.0183523	146.818	0.704971
			11.2814	0.0181879	145.503	0.698656
			11.2855	0.0180231	144.184	0.692325
			11.2896	0.0178579	142.863	0.685982
			11.2937	0.0176925	141.54	0.679628
			11.2978	0.0175267	140.214	0.673261
			11.3019	0.0173608	138.886	0.666884
			11.306	0.0171947	137.558	0.660506
			11.3101	0.0170287	136.229	0.654128
			11.3142	0.0168629	134.903	0.647758
			11.3183	0.0166974	133.579	0.641401
			11.3224	0.0165323	132.258	0.63506
			11.3265	0.0163676	130.941	0.628735
			11.3306	0.0162034	129.627	0.622424
			11.3347	0.0160395	128.316	0.61613
			11.3388	0.015876	127.008	0.609851
			11.3428	0.0157129	125.703	0.603585
			11.3469	0.01555	124.4	0.597329
			11.351	0.0153875	123.1	0.591086
			11.3551	0.0152253	121.803	0.584856
			11.3592	0.0150635	120.508	0.578637
			11.3633	0.014902	119.216	0.572434
			11.3674	0.014741	117.928	0.566253
			11.3715	0.0145807	116.646	0.560093
			11.3756	0.0144211	115.368	0.553961
			11.3797	0.0142623	114.098	0.547863
			11.3838	0.0141044	112.835	0.541797
			11.3879	0.0139474	111.579	0.535764
			11.392	0.0137912	110.329	0.529764
			11.3961	0.0136358	109.086	0.523796
			11.4002	0.0134812	107.849	0.517856
			11.4043	0.0133272	106.618	0.511943
			11.4084	0.013174	105.392	0.506057
			11.4125	0.0130214	104.172	0.500197
			11.4166	0.0128695	102.956	0.494359
			11.4207	0.0127181	101.745	0.488545
			11.4247	0.0125675	100.54	0.482759
			11.4288	0.0124176	99.3408	0.477001
			11.4329	0.0122686	98.1484	0.471276
			11.437	0.0121204	96.9629	0.465583
			11.4411	0.0119731	95.7844	0.459925
			11.4452	0.0118267	94.6136	0.454303
			11.4493	0.0116812	93.45	0.448715
			11.4534	0.0115367	92.2935	0.443163
			11.4575	0.0113931	91.1452	0.437649
			11.4616	0.0112505	90.0037	0.432167
			11.4657	0.0111086	88.8688	0.426718
			11.4698	0.0109677	87.7418	0.421307
			11.4739	0.0108278	86.6223	0.415931
			11.478	0.0106888	85.5104	0.410592
			11.4821	0.0105508	84.4062	0.40529
			11.4862	0.0104137	83.3096	0.400025
			11.4903	0.0102776	82.2205	0.394795
			11.4944	0.0101425	81.1397	0.389606
			11.4985	0.0100085	80.0682	0.384461
			11.5026	0.00987573	79.0058	0.379359
			11.5066	0.0097441	77.9528	0.374303
			11.5107	0.00961373	76.9098	0.369295
			11.5148	0.0094846	75.8768	0.364335
			11.5189	0.00935675	74.854	0.359424
			11.523	0.00923029	73.8423	0.354566
			11.5271	0.00910517	72.8414	0.34976
			11.5312	0.00898134	71.8507	0.345003
			11.5353	0.00885882	70.8706	0.340297
			11.5394	0.00873761	69.9009	0.335641
			11.5435	0.00861754	68.9403	0.331028
			11.5476	0.00849847	67.9877	0.326454
			11.5517	0.00838047	67.0437	0.321921
			11.5558	0.00826356	66.1085	0.317431
			11.5599	0.00814771	65.1817	0.31298
			11.564	0.0080329	64.2632	0.30857
			11.5681	0.00791925	63.354	0.304205
			11.5722	0.00780681	62.4545	0.299885
			11.5763	0.00769558	61.5647	0.295613
			11.5804	0.00758574	60.6859	0.291393
			11.5844	0.00747735	59.8188	0.28723
			11.5885	0.00737043	58.9634	0.283123
			11.5926	0.00726493	58.1195	0.27907
			11.5967	0.00716082	57.2866	0.275071
			11.6008	0.00705798	56.4638	0.27112
			11.6049	0.00695631	55.6505	0.267215
			11.609	0.00685576	54.8461	0.263353
			11.6131	0.00675628	54.0503	0.259531
			11.6172	0.00665785	53.2628	0.25575
			11.6213	0.00656039	52.4831	0.252006
			11.6254	0.00646391	51.7113	0.2483
			11.6295	0.00636837	50.947	0.24463
			11.6336	0.00627384	50.1907	0.240999
			11.6377	0.00618044	49.4435	0.237411
			11.6418	0.0060881	48.7048	0.233864
			11.6459	0.00599687	47.975	0.23036
			11.65	0.00590689	47.2551	0.226903
			11.6541	0.0058182	46.5456	0.223496
			11.6582	0.00573075	45.846	0.220137
			11.6623	0.00564452	45.1562	0.216825
			11.6663	0.00555951	44.4761	0.213559
			11.6704	0.00547569	43.8055	0.210339
			11.6745	0.00539299	43.1439	0.207163
			11.6786	0.00531136	42.4909	0.204027
			11.6827	0.00523075	41.846	0.20093
			11.6868	0.00515114	41.2091	0.197872
			11.6909	0.00507251	40.58	0.194852
			11.695	0.00499479	39.9583	0.191866
			11.6991	0.00491804	39.3443	0.188918
			11.7032	0.00484231	38.7385	0.186009
			11.7073	0.00476766	38.1413	0.183142
			11.7114	0.00469414	37.5531	0.180317
			11.7155	0.00462179	36.9744	0.177538
			11.7196	0.00455064	36.4052	0.174805
			11.7237	0.00448076	35.8461	0.172121
			11.7278	0.00441213	35.297	0.169485
			11.7319	0.00434473	34.7579	0.166896
			11.736	0.0042785	34.228	0.164352
			11.7401	0.00421335	33.7068	0.161849
			11.7441	0.00414935	33.1948	0.15939
			11.7482	0.00408644	32.6915	0.156974
			11.7523	0.00402441	32.1953	0.154591
			11.7564	0.00396333	31.7066	0.152244
			11.7605	0.00390322	31.2257	0.149936
			11.7646	0.00384408	30.7526	0.147664
			11.7687	0.00378598	30.2878	0.145432
			11.7728	0.00372882	29.8306	0.143236
			11.7769	0.00367261	29.3809	0.141077
			11.781	0.00361745	28.9396	0.138958
			11.7851	0.00356337	28.507	0.136881
			11.7892	0.00351025	28.082	0.13484
			11.7933	0.00345806	27.6645	0.132836
			11.7974	0.00340699	27.2559	0.130874
			11.8015	0.00335687	26.855	0.128948
			11.8056	0.00330758	26.4606	0.127055
			11.8097	0.00325922	26.0738	0.125197
			11.8138	0.0032117	25.6936	0.123372
			11.8179	0.00316489	25.3191	0.121574
			11.822	0.00311889	24.9511	0.119807
			11.826	0.00307362	24.5889	0.118068
			11.8301	0.00302899	24.2319	0.116353
			11.8342	0.00298514	23.8811	0.114669
			11.8383	0.00294193	23.5354	0.113009
			11.8424	0.00289946	23.1957	0.111378
			11.8465	0.0028577	22.8616	0.109774
			11.8506	0.00281662	22.5329	0.108196
			11.8547	0.00277632	22.2105	0.106647
			11.8588	0.00273679	21.8943	0.105129
			11.8629	0.00269806	21.5845	0.103641
			11.867	0.00266003	21.2802	0.10218
			11.8711	0.00262275	20.982	0.100748
			11.8752	0.00258628	20.6902	0.0993475
			11.8793	0.00255053	20.4042	0.0979742
			11.8834	0.00251552	20.1241	0.0966293
			11.8875	0.0024812	19.8496	0.0953111
			11.8916	0.00244769	19.5815	0.0940237
			11.8957	0.00241485	19.3188	0.0927624
			11.8998	0.00238266	19.0613	0.0915258
			11.9038	0.00235118	18.8095	0.0903168
			11.9079	0.00232029	18.5623	0.08913
			11.912	0.00229015	18.3212	0.0879723
			11.9161	0.00226055	18.0844	0.0868354
			11.9202	0.00223156	17.8525	0.0857217
			11.9243	0.00220328	17.6262	0.0846352
			11.9284	0.00217548	17.4038	0.0835674
			11.9325	0.00214836	17.1869	0.0825258
			11.9366	0.00212176	16.9741	0.0815038
			11.9407	0.00209556	16.7645	0.0804974
			11.9448	0.00207015	16.5612	0.0795213
			11.9489	0.00204517	16.3614	0.0785617
			11.953	0.00202052	16.1642	0.0776149
			11.9571	0.00199657	15.9725	0.0766948
			11.9612	0.00197292	15.7834	0.0757864
			11.9653	0.00194951	15.596	0.074887
			11.9694	0.00192645	15.4116	0.0740015
			11.9735	0.00190376	15.2301	0.0731296
			11.9776	0.00188114	15.0491	0.0722607
			11.9817	0.00185901	14.872	0.0714105
			11.9857	0.00183718	14.6974	0.070572
			11.9898	0.00181557	14.5245	0.069742
			11.9939	0.00179449	14.3559	0.0689324
			11.998	0.00177417	14.1933	0.0681517
			12.0021	0.0017542	14.0336	0.0673846
			12.0062	0.0017345	13.876	0.0666277
			12.0103	0.00171548	13.7239	0.0658974
			12.0144	0.00169712	13.577	0.0651921
			12.0185	0.00167902	13.4322	0.0644967
			12.0226	0.0016611	13.2888	0.0638082
			12.0267	0.00164353	13.1482	0.0631333
			12.0308	0.0016263	13.0104	0.0624715
			12.0349	0.001609	12.872	0.0618069
			12.039	0.00159165	12.7332	0.0611406
			12.0431	0.00157457	12.5966	0.0604846
			12.0472	0.00155765	12.4612	0.0598346
			12.0513	0.00154094	12.3275	0.0591927
			12.0554	0.0015242	12.1936	0.0585496
			12.0595	0.00150781	12.0625	0.05792
			12.0636	0.00149191	11.9353	0.0573093
			12.0676	0.00147652	11.8121	0.0567179
			12.0717	0.0014613	11.6904	0.0561333
			12.0758	0.00144623	11.5699	0.0555546
			12.0799	0.00143162	11.4529	0.0549931
			12.084	0.00141742	11.3394	0.054448
			12.0881	0.00140368	11.2295	0.0539201
			12.0922	0.00138996	11.1197	0.0533929
			12.0963	0.00137626	11.0101	0.0528667
			12.1004	0.0013628	10.9024	0.0523497
			12.1045	0.00134961	10.7969	0.0518431
			12.1086	0.00133671	10.6937	0.0513474
			12.1127	0.00132369	10.5895	0.0508473
			12.1168	0.00131057	10.4846	0.0503434
			12.1209	0.00129766	10.3813	0.0498473
			12.125	0.001285	10.28	0.0493612
			12.1291	0.0012727	10.1816	0.0488887
			12.1332	0.00126073	10.0859	0.0484289
			12.1373	0.00124878	9.99026	0.0479699
			12.1414	0.00123686	9.89491	0.047512
			12.1454	0.00122525	9.80203	0.0470661
			12.1495	0.00121398	9.71187	0.0466331
			12.1536	0.00120309	9.62476	0.0462149
			12.1577	0.00119264	9.54114	0.0458133
			12.1618	0.00118238	9.45905	0.0454192
			12.1659	0.00117205	9.3764	0.0450223
			12.17	0.0011618	9.29436	0.0446284
			12.1741	0.00115174	9.21395	0.0442423
			12.1782	0.00114191	9.13526	0.0438644
			12.1823	0.00113222	9.05774	0.0434922
			12.1864	0.00112268	8.98146	0.043126
			12.1905	0.00111323	8.90582	0.0427628
			12.1946	0.00110352	8.82814	0.0423898
			12.1987	0.00109378	8.75023	0.0420157
			12.2028	0.00108413	8.67306	0.0416451
			12.2069	0.00107464	8.59708	0.0412803
			12.211	0.00106526	8.52205	0.04092
			12.2151	0.00105604	8.44829	0.0405659
			12.2192	0.00104693	8.37541	0.0402159
			12.2233	0.0010376	8.30084	0.0398578
			12.2273	0.00102831	8.22648	0.0395008
			12.2314	0.00101913	8.15307	0.0391483
			12.2355	0.00101009	8.08071	0.0388009
			12.2396	0.00100124	8.0099	0.0384609
			12.2437	0.000992644	7.94116	0.0381308
			12.2478	0.000984151	7.87321	0.0378045
			12.2519	0.000975754	7.80603	0.0374819
			12.256	0.000967153	7.73723	0.0371516
			12.2601	0.000958662	7.66929	0.0368254
			12.2642	0.000950298	7.60238	0.0365041
			12.2683	0.000942049	7.53639	0.0361872
			12.2724	0.000933944	7.47155	0.0358759
			12.2765	0.000925998	7.40799	0.0355707
			12.2806	0.000918278	7.34622	0.0352741
			12.2847	0.000910869	7.28695	0.0349895
			12.2888	0.000903414	7.22731	0.0347031
			12.2929	0.000895852	7.16681	0.0344126
			12.297	0.000888476	7.10781	0.0341293
			12.3011	0.000881264	7.05011	0.0338523
			12.3051	0.000874164	6.99331	0.0335795
			12.3092	0.000867129	6.93703	0.0333093
			12.3133	0.000860149	6.8812	0.0330412
			12.3174	0.000853267	6.82614	0.0327768
			12.3215	0.000846324	6.77059	0.0325101
			12.3256	0.000839347	6.71478	0.0322421
			12.3297	0.000832096	6.65676	0.0319635
			12.3338	0.000824922	6.59937	0.031688
			12.3379	0.000817813	6.5425	0.0314149
			12.342	0.000810747	6.48597	0.0311435
			12.3461	0.000803727	6.42981	0.0308738
			12.3502	0.000796746	6.37396	0.0306056
			12.3543	0.000789858	6.31886	0.0303411
			12.3584	0.000783176	6.26541	0.0300844
			12.3625	0.000776701	6.21361	0.0298357
			12.3666	0.00077053	6.16424	0.0295986
			12.3707	0.000764339	6.11471	0.0293608
			12.3748	0.000758249	6.066	0.0291269
			12.3789	0.00075234	6.01872	0.0288999
			12.383	0.000746484	5.97187	0.0286749
			12.387	0.000740565	5.92452	0.0284476
			12.3911	0.000734507	5.87605	0.0282148
			12.3952	0.000728308	5.82647	0.0279767
			12.3993	0.00072206	5.77648	0.0277367
			12.4034	0.000715919	5.72735	0.0275008
			12.4075	0.000710084	5.68067	0.0272767
			12.4116	0.000704471	5.63577	0.0270611
			12.4157	0.000698877	5.59101	0.0268462
			12.4198	0.000693385	5.54708	0.0266352
			12.4239	0.000688051	5.50441	0.0264303
			12.428	0.000682731	5.46185	0.026226
			12.4321	0.000677288	5.4183	0.0260169
			12.4362	0.000671623	5.37298	0.0257993
			12.4403	0.00066574	5.32592	0.0255733
			12.4444	0.000659728	5.27783	0.0253424
			12.4485	0.00065376	5.23008	0.0251131
			12.4526	0.000648042	5.18434	0.0248935
			12.4567	0.000642794	5.14235	0.0246919
			12.4608	0.000638191	5.10553	0.024515
			12.4648	0.000634348	5.07478	0.0243674
			12.4689	0.000630784	5.04627	0.0242305
			12.473	0.000627195	5.01756	0.0240926
			12.4771	0.000623666	4.98933	0.0239571
			12.4812	0.000619958	4.95966	0.0238146
			12.4853	0.000615861	4.92689	0.0236573
			12.4894	0.000611238	4.8899	0.0234797
			12.4935	0.000606052	4.84841	0.0232805
			12.4976	0.000600392	4.80314	0.0230631
			12.5017	0.000594452	4.75562	0.0228349
			12.5058	0.000588487	4.70789	0.0226057
			12.5099	0.000582771	4.66217	0.0223862
			12.514	0.000577557	4.62046	0.0221859
			12.5181	0.000573039	4.58431	0.0220123
			12.5222	0.000569211	4.55369	0.0218653
			12.5263	0.000566036	4.52829	0.0217433
			12.5304	0.000563271	4.50617	0.0216371
			12.5345	0.000560381	4.48305	0.0215261
			12.5386	0.000557385	4.45908	0.021411
			12.5427	0.000554102	4.43282	0.0212849
			12.5467	0.000550348	4.40278	0.0211407
			12.5508	0.000546041	4.36833	0.0209752
			12.5549	0.000541194	4.32956	0.0207891
			12.559	0.00053592	4.28736	0.0205865
			12.5631	0.000530408	4.24326	0.0203747
			12.5672	0.000524899	4.1992	0.0201631
			12.5713	0.000519644	4.15715	0.0199612
			12.5754	0.000514863	4.11891	0.0197776
			12.5795	0.000510718	4.08574	0.0196184
			12.5836	0.000507288	4.05831	0.0194866
			12.5877	0.000504583	4.03666	0.0193827
			12.5918	0.000502544	4.02035	0.0193044
			12.5959	0.000501074	4.00859	0.0192479
			12.6	0.000500064	4.00051	0.0192091
			12.6041	0.000499315	3.99452	0.0191804
			12.6082	0.000498691	3.98953	0.0191564
			12.6123	0.000497972	3.98378	0.0191288
			12.6164	0.000496667	3.97334	0.0190786
			12.6205	0.000494787	3.9583	0.0190064
			12.6246	0.000492312	3.93849	0.0189113
			12.6286	0.000489152	3.91322	0.0187899
			12.6327	0.000485275	3.8822	0.018641
			12.6368	0.000480729	3.84584	0.0184664
			12.6409	0.000475636	3.80509	0.0182708
			12.645	0.000470193	3.76154	0.0180617
			12.6491	0.000464659	3.71727	0.0178491
			12.6532	0.000459307	3.67446	0.0176435
			12.6573	0.000454376	3.63501	0.0174541
			12.6614	0.000450056	3.60045	0.0172881
			12.6655	0.000446454	3.57163	0.0171498
			12.6696	0.000443609	3.54887	0.0170405
			12.6737	0.000441481	3.53185	0.0169587
			12.6778	0.000439983	3.51986	0.0169012
			12.6819	0.000438997	3.51197	0.0168633
			12.686	0.000438407	3.50726	0.0168407
			12.6901	0.000438101	3.50481	0.0168289
			12.6942	0.000437982	3.50386	0.0168244
			12.6983	0.000437975	3.5038	0.0168241
			12.7024	0.000438025	3.5042	0.016826
			12.7064	0.000438098	3.50478	0.0168288
			12.7105	0.000438114	3.50491	0.0168294
			12.7146	0.000438034	3.50427	0.0168263
			12.7187	0.000437757	3.50206	0.0168157
			12.7228	0.000436798	3.49438	0.0167789
			12.7269	0.00043515	3.4812	0.0167155
			12.731	0.000432869	3.46295	0.0166279
			12.7351	0.000429871	3.43897	0.0165128
			12.7392	0.000426126	3.40901	0.0163689
			12.7433	0.000421673	3.37339	0.0161979
			12.7474	0.000416615	3.33292	0.0160036
			12.7515	0.000411148	3.28919	0.0157936
			12.7556	0.000405523	3.24418	0.0155775
			12.7597	0.000399991	3.19993	0.015365
			12.7638	0.000394816	3.15853	0.0151662
			12.7679	0.000390205	3.12164	0.0149891
			12.772	0.000386279	3.09023	0.0148383
			12.7761	0.000383085	3.06468	0.0147156
			12.7802	0.000380601	3.04481	0.0146201
			12.7843	0.000378757	3.03005	0.0145493
			12.7883	0.000377448	3.01959	0.014499
			12.7924	0.000376557	3.01245	0.0144648
			12.7965	0.000375973	3.00779	0.0144424
			12.8006	0.000375615	3.00492	0.0144286
			12.8047	0.000375409	3.00327	0.0144207
			12.8088	0.000375305	3.00244	0.0144167
			12.8129	0.000375264	3.00211	0.0144151
			12.817	0.000375259	3.00207	0.0144149
			12.8211	0.000375274	3.00219	0.0144155
			12.8252	0.000375298	3.00238	0.0144164
			12.8293	0.000375325	3.0026	0.0144175
			12.8334	0.000375343	3.00275	0.0144182
			12.8375	0.000375361	3.00289	0.0144188
			12.8416	0.000375384	3.00307	0.0144197
			12.8457	0.000375424	3.00339	0.0144213
			12.8498	0.000375471	3.00377	0.0144231
			12.8539	0.000375527	3.00421	0.0144252
			12.858	0.000375594	3.00475	0.0144278
			12.8621	0.000375669	3.00535	0.0144307
			12.8661	0.000375759	3.00608	0.0144342
			12.8702	0.000375864	3.00692	0.0144382
			12.8743	0.00037598	3.00784	0.0144426
			12.8784	0.000376069	3.00855	0.0144461
			12.8825	0.000376112	3.0089	0.0144477
			12.8866	0.000375592	3.00474	0.0144278
			12.8907	0.000374305	2.99444	0.0143783
			12.8948	0.000372405	2.97924	0.0143053
			12.8989	0.000369779	2.95823	0.0142044
			12.903	0.000366368	2.93094	0.0140734
			12.9071	0.000362176	2.89741	0.0139124
			12.9112	0.00035728	2.85824	0.0137243
			12.9153	0.000351852	2.81482	0.0135158
			12.9194	0.000346135	2.76908	0.0132962
			12.9235	0.000340402	2.72322	0.013076
			12.9276	0.000334943	2.67954	0.0128663
			12.9317	0.000330006	2.64004	0.0126766
			12.9358	0.00032576	2.60608	0.0125135
			12.9399	0.000322287	2.57829	0.0123801
			12.944	0.000319587	2.5567	0.0122764
			12.948	0.00031759	2.54072	0.0121997
			12.9521	0.000316185	2.52948	0.0121457
			12.9562	0.00031524	2.52192	0.0121094
			12.9603	0.000314636	2.51709	0.0120862
			12.9644	0.000314266	2.51413	0.012072
			12.9685	0.000314033	2.51227	0.0120631
			12.9726	0.000313885	2.51108	0.0120574
			12.9767	0.0003138	2.5104	0.0120541
			12.9808	0.000313737	2.50989	0.0120517
			12.9849	0.000313679	2.50944	0.0120495
			12.989	0.000313621	2.50897	0.0120472
			12.9931	0.000313501	2.508	0.0120426
			12.9972	0.000313368	2.50695	0.0120375
			13.0013	0.00031324	2.50592	0.0120326
			13.0054	0.000313114	2.50491	0.0120277
			13.0095	0.000312993	2.50394	0.0120231
			13.0136	0.000312882	2.50306	0.0120188
			13.0177	0.000312793	2.50234	0.0120154
			13.0218	0.000312733	2.50186	0.0120131
			13.0259	0.000312715	2.50172	0.0120124
			13.0299	0.000312742	2.50193	0.0120134
			13.034	0.000312813	2.50251	0.0120162
			13.0381	0.000312926	2.50341	0.0120205
			13.0422	0.000313058	2.50446	0.0120256
			13.0463	0.000313208	2.50566	0.0120314
			13.0504	0.000313363	2.5069	0.0120373
			13.0545	0.000313508	2.50807	0.0120429
			13.0586	0.000313635	2.50908	0.0120477
			13.0627	0.00031373	2.50984	0.0120514
			13.0668	0.000313789	2.51031	0.0120537
			13.0709	0.000313818	2.51054	0.0120548
			13.075	0.00031381	2.51048	0.0120545
			13.0791	0.000313778	2.51023	0.0120533
			13.0832	0.000313741	2.50993	0.0120518
			13.0873	0.000313717	2.50974	0.0120509
			13.0914	0.000313704	2.50963	0.0120504
			13.0955	0.000313709	2.50967	0.0120506
			13.0996	0.000313737	2.5099	0.0120517
			13.1037	0.000313794	2.51035	0.0120539
			13.1077	0.000313876	2.51101	0.012057
			13.1118	0.000313962	2.5117	0.0120603
			13.1159	0.000313726	2.50981	0.0120513
			13.12	0.00031281	2.50248	0.0120161
			13.1241	0.000311232	2.48986	0.0119555
			13.1282	0.00030898	2.47184	0.011869
			13.1323	0.000305965	2.44772	0.0117531
			13.1364	0.000302143	2.41715	0.0116063
			13.1405	0.000297558	2.38047	0.0114302
			13.1446	0.000292343	2.33874	0.0112299
			13.1487	0.000286714	2.29371	0.0110136
			13.1528	0.000280951	2.2476	0.0107922
			13.1569	0.000275346	2.20277	0.0105769
			13.161	0.000270165	2.16132	0.0103779
			13.1651	0.000265616	2.12492	0.0102032
			13.1692	0.00026182	2.09456	0.0100574
			13.1733	0.000258817	2.07054	0.00994203
			13.1774	0.000256564	2.05251	0.00985548
			13.1815	0.00025496	2.03968	0.00979388
			13.1856	0.000253881	2.03105	0.0097524
			13.1896	0.000253197	2.02558	0.00972615
			13.1937	0.000252793	2.02235	0.00971064
			13.1978	0.00025257	2.02056	0.00970206
			13.2019	0.000252448	2.01958	0.00969736
			13.206	0.000252387	2.01909	0.00969501
			13.2101	0.000252353	2.01882	0.00969371
			13.2142	0.000252326	2.01861	0.00969266
			13.2183	0.000252295	2.01836	0.00969151
			13.2224	0.000252273	2.01818	0.00969064
			13.2265	0.000252254	2.01803	0.0096899
			13.2306	0.00025224	2.01792	0.00968939
			13.2347	0.000252238	2.0179	0.00968928
			13.2388	0.000252249	2.018	0.00968974
			13.2429	0.000252277	2.01822	0.00969081
			13.247	0.00025232	2.01856	0.00969245
			13.2511	0.000252371	2.01897	0.0096944
			13.2552	0.000252432	2.01946	0.00969675
			13.2593	0.000252497	2.01997	0.00969924
			13.2634	0.000252558	2.02046	0.00970158
			13.2674	0.00025261	2.02088	0.00970358
			13.2715	0.000252642	2.02114	0.00970482
			13.2756	0.00025266	2.02128	0.00970551
			13.2797	0.000252667	2.02134	0.00970579
			13.2838	0.000252665	2.02132	0.00970572
			13.2879	0.000252658	2.02126	0.00970543
			13.292	0.000252648	2.02119	0.00970506
			13.2961	0.000252639	2.02111	0.0097047
			13.3002	0.000252633	2.02106	0.00970446
			13.3043	0.000252633	2.02106	0.00970447
			13.3084	0.000252641	2.02113	0.00970477
			13.3125	0.000252657	2.02126	0.00970541
			13.3166	0.000252681	2.02145	0.00970632
			13.3207	0.00025271	2.02168	0.00970743
			13.3248	0.000252651	2.02121	0.00970518
			13.3289	0.000252552	2.02042	0.00970136
			13.333	0.000252434	2.01947	0.00969684
			13.3371	0.000252283	2.01826	0.00969103
			13.3412	0.000252104	2.01684	0.00968417
			13.3453	0.000251903	2.01522	0.00967642
			13.3493	0.000251636	2.01309	0.00966617
			13.3534	0.000251298	2.01038	0.00965317
			13.3575	0.000250819	2.00655	0.00963478
			13.3616	0.000249761	1.99808	0.00959413
			13.3657	0.000248057	1.98446	0.0095287
			13.3698	0.000245776	1.96621	0.00944109
			13.3739	0.000242841	1.94273	0.00932832
			13.378	0.000239194	1.91355	0.00918823
			13.3821	0.000234851	1.87881	0.0090214
			13.3862	0.000229911	1.83929	0.00883164
			13.3903	0.00022455	1.7964	0.00862572
			13.3944	0.000219019	1.75215	0.00841325
			13.3985	0.000213583	1.70866	0.00820442
			13.4026	0.000208499	1.66799	0.00800915
			13.4067	0.00020398	1.63184	0.00783554
			13.4108	0.000200157	1.60125	0.00768869
			13.4149	0.000197088	1.57671	0.00757082
			13.419	0.000194751	1.558	0.00748102
			13.4231	0.000193062	1.5445	0.00741616
			13.4271	0.000191908	1.53527	0.00737183
			13.4312	0.000191161	1.52929	0.00734311
			13.4353	0.000190703	1.52562	0.00732552
			13.4394	0.000190433	1.52347	0.00731517
			13.4435	0.000190281	1.52225	0.00730933
			13.4476	0.000190195	1.52156	0.007306
			13.4517	0.000190145	1.52116	0.00730409
			13.4558	0.000190111	1.52089	0.00730281
			13.4599	0.000190083	1.52066	0.0073017
			13.464	0.000190054	1.52044	0.00730062
			13.4681	0.000190041	1.52033	0.0073001
			13.4722	0.000190039	1.52031	0.00730003
			13.4763	0.000190051	1.52041	0.00730048
			13.4804	0.00019008	1.52064	0.00730161
			13.4845	0.000190131	1.52105	0.00730356
			13.4886	0.000190203	1.52162	0.00730631
			13.4927	0.000190293	1.52235	0.00730979
			13.4968	0.000190395	1.52316	0.00731372
			13.5009	0.000190511	1.52409	0.00731815
			13.505	0.000190631	1.52505	0.00732278
			13.509	0.000190747	1.52597	0.00732721
			13.5131	0.00019085	1.5268	0.0073312
			13.5172	0.00019093	1.52744	0.00733427
			13.5213	0.000190982	1.52785	0.00733624
			13.5254	0.000191005	1.52804	0.00733715
			13.5295	0.000191	1.528	0.00733693
			13.5336	0.000190961	1.52769	0.00733546
			13.5377	0.000190912	1.5273	0.00733356
			13.5418	0.000190848	1.52678	0.0073311
			13.5459	0.000190774	1.52619	0.00732825
			13.55	0.000190697	1.52557	0.00732529
			13.5541	0.000190621	1.52497	0.00732238
			13.5582	0.000190542	1.52434	0.00731936
			13.5623	0.000190471	1.52377	0.00731662
			13.5664	0.000190411	1.52328	0.0073143
			13.5705	0.000190368	1.52295	0.00731268
			13.5746	0.000190336	1.52269	0.00731144
			13.5787	0.000190312	1.5225	0.00731053
			13.5828	0.000190296	1.52237	0.00730991
			13.5869	0.000190289	1.52231	0.00730961
			13.5909	0.000190291	1.52232	0.00730969
			13.595	0.000190304	1.52243	0.00731021
			13.5991	0.000190323	1.52258	0.00731093
			13.6032	0.000190336	1.52269	0.00731143
			13.6073	0.000190366	1.52293	0.00731258
			13.6114	0.000190401	1.52321	0.00731395
			13.6155	0.000190441	1.52353	0.00731546
			13.6196	0.000190478	1.52383	0.0073169
			13.6237	0.000190513	1.5241	0.00731824
			13.6278	0.000190544	1.52436	0.00731945
			13.6319	0.000190575	1.5246	0.00732064
			13.636	0.000190608	1.52486	0.00732188
			13.6401	0.000190643	1.52514	0.00732323
			13.6442	0.00019067	1.52536	0.00732427
			13.6483	0.000190686	1.52549	0.00732488
			13.6524	0.000190691	1.52553	0.00732507
			13.6565	0.00019068	1.52544	0.00732465
			13.6606	0.000190638	1.5251	0.00732304
			13.6647	0.000190571	1.52457	0.00732047
			13.6687	0.000190478	1.52383	0.00731691
			13.6728	0.000190362	1.5229	0.00731245
			13.6769	0.000190242	1.52193	0.00730781
			13.681	0.000190119	1.52095	0.00730311
			13.6851	0.000190004	1.52003	0.00729869
			13.6892	0.000189896	1.51917	0.00729454
			13.6933	0.000189799	1.51839	0.00729079
			13.6974	0.0001897	1.5176	0.00728701
			13.7015	0.000189612	1.51689	0.00728362
			13.7056	0.000189539	1.51631	0.00728081
			13.7097	0.000189478	1.51582	0.00727848
			13.7138	0.000189423	1.51539	0.00727638
			13.7179	0.000189372	1.51498	0.00727442
			13.722	0.000189326	1.51461	0.00727265
			13.7261	0.000189289	1.51431	0.0072712
			13.7302	0.000189264	1.51411	0.00727025
			13.7343	0.000189256	1.51405	0.00726996
			13.7384	0.000189269	1.51415	0.00727045
			13.7425	0.000189289	1.51431	0.0072712
			13.7466	0.000189145	1.51316	0.0072657
			13.7506	0.000188421	1.50737	0.00723787
			13.7547	0.000187009	1.49607	0.00718362
			13.7588	0.000184993	1.47994	0.00710618
			13.7629	0.000182266	1.45813	0.00700145
			13.767	0.000178769	1.43015	0.00686712
			13.7711	0.000174521	1.39617	0.00670393
			13.7752	0.000169622	1.35698	0.00651576
			13.7793	0.00016426	1.31408	0.00630976
			13.7834	0.000158691	1.26953	0.00609584
			13.7875	0.000153185	1.22548	0.00588435
			13.7916	0.000148013	1.1841	0.00568566
			13.7957	0.000143389	1.14711	0.00550806
			13.7998	0.000139454	1.11563	0.00535688
			13.8039	0.000136277	1.09022	0.00523487
			13.808	0.000133834	1.07068	0.00514103
			13.8121	0.000132042	1.05634	0.00507218
			13.8162	0.000130784	1.04627	0.00502385
			13.8203	0.000129931	1.03945	0.00499108
			13.8244	0.000129366	1.03492	0.00496936
			13.8284	0.000128987	1.0319	0.00495482
			13.8325	0.000128738	1.02991	0.00494526
			13.8366	0.000128573	1.02858	0.0049389
			13.8407	0.000128458	1.02767	0.00493451
			13.8448	0.000128378	1.02702	0.00493141
			13.8489	0.000128322	1.02658	0.00492929
			13.853	0.00012829	1.02632	0.00492805
			13.8571	0.000128278	1.02622	0.00492758
			13.8612	0.000128279	1.02623	0.00492763
			13.8653	0.000128289	1.02631	0.00492801
			13.8694	0.000128303	1.02642	0.00492853
			13.8735	0.000128317	1.02653	0.00492907
			13.8776	0.000128326	1.02661	0.00492944
			13.8817	0.000128328	1.02663	0.00492951
			13.8858	0.000128319	1.02655	0.00492915
			13.8899	0.000128297	1.02637	0.00492831
			13.894	0.000128259	1.02607	0.00492685
			13.8981	0.000128204	1.02563	0.00492475
			13.9022	0.000128148	1.02518	0.00492257
			13.9063	0.000128085	1.02468	0.00492017
			13.9103	0.000128019	1.02415	0.00491765
			13.9144	0.000127948	1.02359	0.00491491
			13.9185	0.000127875	1.023	0.00491208
			13.9226	0.000127808	1.02246	0.00490951
			13.9267	0.000127762	1.0221	0.00490778
			13.9308	0.000127736	1.02189	0.00490676
			13.9349	0.000127729	1.02184	0.00490651
			13.939	0.000127745	1.02196	0.00490711
			13.9431	0.000127784	1.02227	0.00490861
			13.9472	0.000127844	1.02275	0.0049109
			13.9513	0.000127921	1.02337	0.00491386
			13.9554	0.000127997	1.02397	0.00491678
			13.9595	0.000128079	1.02463	0.00491995
			13.9636	0.000128159	1.02527	0.00492301
			13.9677	0.000128229	1.02583	0.00492569
			13.9718	0.000128289	1.02631	0.00492801
			13.9759	0.000128345	1.02676	0.00493015
			13.98	0.000128395	1.02716	0.00493206
			13.9841	0.000128443	1.02754	0.0049339
			13.9881	0.000128496	1.02796	0.00493594
			13.9922	0.000128559	1.02847	0.00493839
			13.9963	0.000128637	1.0291	0.00494139
			14.0004	0.000128731	1.02985	0.00494498
			14.0045	0.000128838	1.0307	0.00494909
			14.0086	0.000128953	1.03162	0.0049535
			14.0127	0.000129069	1.03255	0.00495797
			14.0168	0.000129176	1.03341	0.00496207
			14.0209	0.000129261	1.03409	0.00496535
			14.025	0.00012933	1.03464	0.00496799
			14.0291	0.000129379	1.03503	0.00496987
			14.0332	0.000129406	1.03525	0.0049709
			14.0373	0.000129412	1.03529	0.00497114
			14.0414	0.000129408	1.03526	0.00497097
			14.0455	0.000129394	1.03515	0.00497046
			14.0496	0.000129373	1.03499	0.00496965
			14.0537	0.000129348	1.03479	0.00496869
			14.0578	0.000129317	1.03454	0.0049675
			14.0619	0.000129287	1.0343	0.00496634
			14.066	0.000129262	1.0341	0.0049654
			14.07	0.000129242	1.03394	0.00496461
			14.0741	0.000129223	1.03378	0.00496387
			14.0782	0.000129203	1.03363	0.00496313
			14.0823	0.000129184	1.03347	0.00496237
			14.0864	0.000129163	1.03331	0.00496159
			14.0905	0.000129139	1.03311	0.00496065
			14.0946	0.000129114	1.03291	0.0049597
			14.0987	0.000129097	1.03278	0.00495904
			14.1028	0.000129086	1.03268	0.0049586
			14.1069	0.000129082	1.03265	0.00495846
			14.111	0.000129088	1.03271	0.00495872
			14.1151	0.000129107	1.03285	0.00495941
			14.1192	0.000129136	1.03308	0.00496053
			14.1233	0.000129176	1.03341	0.00496207
			14.1274	0.000129221	1.03376	0.00496379
			14.1315	0.000129271	1.03417	0.00496574
			14.1356	0.000129328	1.03462	0.00496791
			14.1397	0.000129383	1.03507	0.00497004
			14.1438	0.000129433	1.03547	0.00497196
			14.1479	0.000129472	1.03577	0.00497344
			14.1519	0.000129495	1.03596	0.00497434
			14.156	0.000129503	1.03602	0.00497464
			14.1601	0.000129495	1.03596	0.00497434
			14.1642	0.00012947	1.03576	0.00497338
			14.1683	0.000129443	1.03554	0.00497232
			14.1724	0.000129415	1.03532	0.00497125
			14.1765	0.000129389	1.03511	0.00497025
			14.1806	0.000129369	1.03496	0.00496951
			14.1847	0.000129361	1.03489	0.00496917
			14.1888	0.000129362	1.0349	0.00496923
			14.1929	0.000129372	1.03498	0.0049696
			14.197	0.000129387	1.03509	0.00497017
			14.2011	0.000129391	1.03513	0.00497034
			14.2052	0.00012939	1.03512	0.00497031
			14.2093	0.000129382	1.03505	0.00496998
			14.2134	0.000129362	1.0349	0.00496922
			14.2175	0.000129328	1.03463	0.00496793
			14.2216	0.000129283	1.03426	0.00496618
			14.2257	0.000129228	1.03383	0.00496409
			14.2297	0.000129171	1.03337	0.00496188
			14.2338	0.000129112	1.0329	0.00495963
			14.2379	0.000129061	1.03249	0.00495767
			14.242	0.000129018	1.03215	0.00495601
			14.2461	0.000128982	1.03186	0.00495464
			14.2502	0.000128943	1.03154	0.00495313
			14.2543	0.000128912	1.0313	0.00495196
			14.2584	0.000128881	1.03104	0.00495073
			14.2625	0.000128845	1.03076	0.00494936
			14.2666	0.000128803	1.03042	0.00494774
			14.2707	0.000128753	1.03003	0.00494584
			14.2748	0.000128716	1.02973	0.00494442
			14.2789	0.000128687	1.02949	0.00494328
			14.283	0.000128669	1.02935	0.0049426
			14.2871	0.000128665	1.02932	0.00494245
			14.2912	0.000128676	1.02941	0.00494289
			14.2953	0.000128699	1.02959	0.00494375
			14.2994	0.000128726	1.02981	0.00494481
			14.3035	0.000128748	1.02998	0.00494563
			14.3076	0.000128766	1.03013	0.00494634
			14.3116	0.000128779	1.03023	0.00494684
			14.3157	0.00012878	1.03024	0.00494688
			14.3198	0.000128756	1.03005	0.00494593
			14.3239	0.000128701	1.02961	0.00494384
			14.328	0.00012863	1.02904	0.00494109
			14.3321	0.000128542	1.02834	0.00493774
			14.3362	0.000128443	1.02755	0.00493394
			14.3403	0.000128338	1.02671	0.00492989
			14.3444	0.000128243	1.02594	0.00492624
			14.3485	0.000128159	1.02527	0.00492301
			14.3526	0.000128091	1.02473	0.00492041
			14.3567	0.000128043	1.02435	0.00491856
			14.3608	0.000128017	1.02413	0.00491755
			14.3649	0.000128006	1.02405	0.00491715
			14.369	0.000128025	1.0242	0.00491785
			14.3731	0.00012807	1.02456	0.00491958
			14.3772	0.000128139	1.02511	0.00492224
			14.3813	0.000128234	1.02587	0.00492591
			14.3854	0.000128349	1.02679	0.0049303
			14.3894	0.000128478	1.02782	0.00493527
			14.3935	0.000128619	1.02896	0.0049407
			14.3976	0.000128702	1.02961	0.00494385
			14.4017	0.000128747	1.02998	0.0049456
			14.4058	0.000128801	1.03041	0.00494767
			14.4099	0.000128833	1.03067	0.00494892
			14.414	0.000128852	1.03082	0.00494965
			14.4181	0.000128852	1.03082	0.00494964
			14.4222	0.00012884	1.03072	0.00494919
			14.4263	0.000128829	1.03063	0.00494876
			14.4304	0.000128823	1.03058	0.0049485
			14.4345	0.000128839	1.03071	0.00494912
			14.4386	0.000128881	1.03105	0.00495076
			14.4427	0.000128937	1.0315	0.0049529
			14.4468	0.000128992	1.03194	0.00495502
			14.4509	0.000129061	1.03248	0.00495765
			14.455	0.000129124	1.03299	0.00496008
			14.4591	0.000129177	1.03342	0.00496212
			14.4632	0.000129215	1.03372	0.00496359
			14.4673	0.000129237	1.0339	0.00496444
			14.4713	0.000129248	1.03399	0.00496485
			14.4754	0.00012925	1.034	0.0049649
			14.4795	0.000129253	1.03402	0.00496503
			14.4836	0.000129264	1.03411	0.00496545
			14.4877	0.000129282	1.03425	0.00496613
			14.4918	0.000129301	1.03441	0.00496689
			14.4959	0.000129319	1.03455	0.00496758
			14.5	0.000129335	1.03468	0.0049682
			14.5041	0.00012935	1.0348	0.00496876
			14.5082	0.000129363	1.0349	0.00496926
			14.5123	0.000129375	1.035	0.00496971
			14.5164	0.000129387	1.0351	0.00497019
			14.5205	0.000129405	1.03524	0.00497089
			14.5246	0.000129431	1.03545	0.00497188
			14.5287	0.000129464	1.03572	0.00497316
			14.5328	0.0001295	1.036	0.00497454
			14.5369	0.000129536	1.03629	0.00497591
			14.541	0.000129573	1.03659	0.00497735
			14.5451	0.000129609	1.03687	0.0049787
			14.5491	0.000129627	1.03701	0.00497939
			14.5532	0.00012962	1.03696	0.00497914
			14.5573	0.000129593	1.03674	0.00497809
			14.5614	0.000129543	1.03634	0.00497618
			14.5655	0.000129469	1.03575	0.00497334
			14.5696	0.000129372	1.03498	0.00496961
			14.5737	0.000129259	1.03407	0.00496527
			14.5778	0.000129135	1.03308	0.00496052
			14.5819	0.000129009	1.03207	0.00495565
			14.586	0.00012889	1.03112	0.00495108
			14.5901	0.000128794	1.03035	0.0049474
			14.5942	0.000128727	1.02981	0.00494482
			14.5983	0.000128696	1.02957	0.00494365
			14.6024	0.000128701	1.02961	0.00494383
			14.6065	0.00012874	1.02992	0.00494532
			14.6106	0.000128807	1.03045	0.00494789
			14.6147	0.000128895	1.03116	0.00495127
			14.6188	0.000128994	1.03196	0.0049551
			14.6229	0.000129094	1.03275	0.00495892
			14.627	0.000129187	1.0335	0.00496251
			14.631	0.000129268	1.03415	0.00496563
			14.6351	0.000129334	1.03467	0.00496814
			14.6392	0.000129386	1.03509	0.00497016
			14.6433	0.000129423	1.03539	0.00497158
			14.6474	0.000129449	1.03559	0.00497255
			14.6515	0.000129463	1.03571	0.00497312
			14.6556	0.000129462	1.0357	0.00497306
			14.6597	0.000129464	1.03571	0.00497315
			14.6638	0.000129464	1.03571	0.00497315
			14.6679	0.000129461	1.03569	0.00497302
			14.672	0.000129451	1.03561	0.00497263
			14.6761	0.000129428	1.03542	0.00497174
			14.6802	0.000129393	1.03514	0.0049704
			14.6843	0.000129344	1.03475	0.00496855
			14.6884	0.000129281	1.03425	0.00496612
			14.6925	0.000129217	1.03374	0.00496365
			14.6966	0.000129154	1.03323	0.00496124
			14.7007	0.000129097	1.03278	0.00495904
			14.7048	0.000129049	1.03239	0.00495718
			14.7089	0.000129014	1.03211	0.00495584
			14.7129	0.000128994	1.03195	0.0049551
			14.717	0.000128992	1.03194	0.00495501
			14.7211	0.000129005	1.03204	0.00495551
			14.7252	0.000129026	1.03221	0.00495631
			14.7293	0.000129069	1.03255	0.00495796
			14.7334	0.000129123	1.03298	0.00496005
			14.7375	0.000129177	1.03341	0.0049621
			14.7416	0.000129223	1.03379	0.0049639
			14.7457	0.000129252	1.03401	0.00496499
			14.7498	0.000129264	1.03411	0.00496544
			14.7539	0.000129263	1.03411	0.00496544
			14.758	0.000129252	1.03402	0.004965
			14.7621	0.000129231	1.03385	0.0049642
			14.7662	0.000129203	1.03362	0.0049631
			14.7703	0.000129168	1.03335	0.00496178
			14.7744	0.000129133	1.03306	0.00496041
			14.7785	0.000129103	1.03282	0.00495926
			14.7826	0.000129095	1.03276	0.00495896
			14.7867	0.000129104	1.03283	0.00495932
			14.7907	0.000129132	1.03306	0.00496039
			14.7948	0.000129174	1.03339	0.004962
			14.7989	0.000129224	1.0338	0.00496394
			14.803	0.000129283	1.03426	0.00496619
			14.8071	0.000129344	1.03475	0.00496853
			14.8112	0.000129401	1.03521	0.00497073
			14.8153	0.000129451	1.03561	0.00497263
			14.8194	0.000129489	1.03592	0.00497412
			14.8235	0.000129392	1.03513	0.00497036
			14.8276	0.000129098	1.03278	0.00495909
			14.8317	0.00012841	1.02728	0.00493267
			14.8358	0.00012692	1.01536	0.00487542
			14.8399	0.000124825	0.998603	0.00479496
			14.844	0.000122034	0.976269	0.00468772
			14.8481	0.000118495	0.947957	0.00455177
			14.8522	0.000114217	0.913735	0.00438745
			14.8563	0.000109287	0.8743	0.00419809
			14.8604	0.000103858	0.830864	0.00398953
			14.8645	9.81631e-05	0.785304	0.00377077
			14.8686	9.25214e-05	0.740171	0.00355405
			14.8726	8.71659e-05	0.697327	0.00334833
			14.8767	8.23224e-05	0.658579	0.00316228
			14.8808	7.81524e-05	0.625219	0.00300209
			14.8849	7.47346e-05	0.597877	0.0028708
			14.889	7.20723e-05	0.576579	0.00276854
			14.8931	7.01011e-05	0.560809	0.00269282
			14.8972	6.90817e-05	0.552654	0.00265366
			14.9013	6.92284e-05	0.553827	0.00265929
			14.9054	7.02823e-05	0.562258	0.00269978
			14.9095	7.22339e-05	0.577871	0.00277474
			14.9136	7.50772e-05	0.600618	0.00288397
			14.9177	7.87815e-05	0.630252	0.00302626
			14.9218	8.31237e-05	0.66499	0.00319306
			14.9259	8.789e-05	0.70312	0.00337615
			14.93	9.23898e-05	0.739119	0.003549
			14.9341	9.63519e-05	0.770815	0.0037012
			14.9382	9.95623e-05	0.796498	0.00382452
			14.9423	0.000101668	0.813342	0.0039054
			14.9464	0.000102436	0.819485	0.00393489
			14.9504	0.00010178	0.814239	0.0039097
			14.9545	9.9785e-05	0.79828	0.00383307
			14.9586	9.66815e-05	0.773452	0.00371386
			14.9627	9.28119e-05	0.742495	0.00356521
			14.9668	8.85697e-05	0.708558	0.00340226
			14.9709	8.43273e-05	0.674619	0.00323929
			14.975	8.0388e-05	0.643104	0.00308797
			14.9791	7.69608e-05	0.615686	0.00295632
			14.9832	7.41422e-05	0.593138	0.00284805
			14.9873	7.19569e-05	0.575655	0.0027641
			14.9914	7.03463e-05	0.56277	0.00270223
			14.9955	6.92158e-05	0.553727	0.00265881
			14.9996	6.84567e-05	0.547653	0.00262965
			15.0037	6.79657e-05	0.543725	0.00261079
			15.0078	6.76591e-05	0.541273	0.00259901
			15.0119	6.74806e-05	0.539845	0.00259215
			15.016	6.7384e-05	0.539072	0.00258844
			15.0201	6.73375e-05	0.5387	0.00258666
			15.0242	6.73214e-05	0.538571	0.00258604
			15.0283	6.73273e-05	0.538619	0.00258627
			15.0323	6.73441e-05	0.538753	0.00258691
			15.0364	6.73652e-05	0.538921	0.00258772
			15.0405	6.73813e-05	0.53905	0.00258834
			15.0446	6.74009e-05	0.539207	0.00258909
			15.0487	6.74211e-05	0.539369	0.00258987
			15.0528	6.74429e-05	0.539543	0.0025907
			15.0569	6.74659e-05	0.539727	0.00259159
			15.061	6.74928e-05	0.539942	0.00259262
			15.0651	6.75266e-05	0.540213	0.00259392
			15.0692	6.75688e-05	0.54055	0.00259554
			15.0733	6.7618e-05	0.540944	0.00259743
			15.0774	6.76e-05	0.5408	0.00259674
			15.0815	6.75559e-05	0.540447	0.00259505
			15.0856	6.74985e-05	0.539988	0.00259284
			15.0897	6.74315e-05	0.539452	0.00259027
			15.0938	6.73384e-05	0.538707	0.00258669
			15.0979	6.72265e-05	0.537812	0.00258239
			15.102	6.71097e-05	0.536878	0.00257791
			15.1061	6.70083e-05	0.536067	0.00257401
			15.1101	6.69368e-05	0.535494	0.00257126
			15.1142	6.69084e-05	0.535267	0.00257017
			15.1183	6.69292e-05	0.535434	0.00257097
			15.1224	6.69989e-05	0.535991	0.00257365
			15.1265	6.71024e-05	0.536819	0.00257763
			15.1306	6.72278e-05	0.537822	0.00258244
			15.1347	6.73584e-05	0.538867	0.00258746
			15.1388	6.74774e-05	0.539819	0.00259203
			15.1429	6.75528e-05	0.540422	0.00259493
			15.147	6.75639e-05	0.540511	0.00259535
			15.1511	6.74945e-05	0.539956	0.00259269
			15.1552	6.73639e-05	0.538911	0.00258767
			15.1593	6.7198e-05	0.537584	0.0025813
			15.1634	6.69996e-05	0.535997	0.00257368
			15.1675	6.67898e-05	0.534319	0.00256562
			15.1716	6.65836e-05	0.532669	0.0025577
			15.1757	6.64041e-05	0.531233	0.0025508
[truncated: 445 more rows]

## Sheet: Figure 5B
hL1ORF1p-Dcons			wavelength	MRE
			(nm)	(deg/(cm*M))
MW (kDa)	12.4067		240	-7.95281
Concentration (mM)	0.0120902		239.9	-8.09783
Peptide bonds	105		239.8	-8.26633
			239.7	-8.45688
			239.6	-8.6687
			239.5	-8.89478
			239.4	-9.13393
			239.3	-9.38033
			239.2	-9.6291
			239.1	-9.87132
			239	-10.1057
			238.9	-10.3248
			238.8	-10.5227
			238.7	-10.6913
			238.6	-10.8428
			238.5	-10.9771
			238.4	-11.0951
			238.3	-11.2073
			238.2	-11.3184
			238.1	-11.4288
			238	-11.5453
			237.9	-11.6723
			237.8	-11.8036
			237.7	-11.9353
			237.6	-12.0667
			237.5	-12.1985
			237.4	-12.3366
			237.3	-12.483
			237.2	-12.6381
			237.1	-12.7997
			237	-12.9676
			236.9	-13.129
			236.8	-13.291
			236.7	-13.4529
			236.6	-13.62
			236.5	-13.7883
			236.4	-13.9627
			236.3	-14.1409
			236.2	-14.3314
			236.1	-14.5362
			236	-14.7607
			235.9	-15.0071
			235.8	-15.2735
			235.7	-15.5585
			235.6	-15.8673
			235.5	-16.1999
			235.4	-16.552
			235.3	-16.9171
			235.2	-17.2919
			235.1	-17.6686
			235	-18.0508
			234.9	-18.4377
			234.8	-18.8236
			234.7	-19.2076
			234.6	-19.5823
			234.5	-19.9439
			234.4	-20.303
			234.3	-20.6601
			234.2	-21.0155
			234.1	-21.3651
			234	-21.7037
			233.9	-22.0266
			233.8	-22.3366
			233.7	-22.6369
			233.6	-22.9342
			233.5	-23.2319
			233.4	-23.5233
			233.3	-23.8161
			233.2	-24.1091
			233.1	-24.3951
			233	-24.6685
			232.9	-24.9201
			232.8	-25.158
			232.7	-25.3866
			232.6	-25.6119
			232.5	-25.8304
			232.4	-26.0486
			232.3	-26.2736
			232.2	-26.4914
			232.1	-26.6993
			232	-26.9009
			231.9	-27.1148
			231.8	-27.3348
			231.7	-27.555
			231.6	-27.7671
			231.5	-27.9715
			231.4	-28.1708
			231.3	-28.3762
			231.2	-28.5891
			231.1	-28.8085
			231	-29.0327
			230.9	-29.2683
			230.8	-29.5116
			230.7	-29.7647
			230.6	-30.0332
			230.5	-30.3209
			230.4	-30.6357
			230.3	-30.9664
			230.2	-31.3022
			230.1	-31.6324
			230	-31.9576
			229.9	-32.2787
			229.8	-32.5857
			229.7	-32.8922
			229.6	-33.2073
			229.5	-33.5253
			229.4	-33.8356
			229.3	-34.1364
			229.2	-34.4235
			229.1	-34.693
			229	-34.9476
			228.9	-35.2015
			228.8	-35.4657
			228.7	-35.749
			228.6	-36.0434
			228.5	-36.3604
			228.4	-36.7038
			228.3	-37.0654
			228.2	-37.4491
			228.1	-37.8508
			228	-38.2604
			227.9	-38.6679
			227.8	-39.0625
			227.7	-39.4396
			227.6	-39.8135
			227.5	-40.1852
			227.4	-40.5539
			227.3	-40.9129
			227.2	-41.2476
			227.1	-41.5465
			227	-41.8163
			226.9	-42.0614
			226.8	-42.2857
			226.7	-42.4965
			226.6	-42.7015
			226.5	-42.9142
			226.4	-43.14
			226.3	-43.3736
			226.2	-43.6155
			226.1	-43.8749
			226	-44.1385
			225.9	-44.3998
			225.8	-44.6682
			225.7	-44.9451
			225.6	-45.2206
			225.5	-45.4886
			225.4	-45.7426
			225.3	-45.9819
			225.2	-46.2045
			225.1	-46.3963
			225	-46.5572
			224.9	-46.6713
			224.8	-46.741
			224.7	-46.7729
			224.6	-46.7725
			224.5	-46.767
			224.4	-46.7629
			224.3	-46.7603
			224.2	-46.7519
			224.1	-46.7491
			224	-46.7627
			223.9	-46.7982
			223.8	-46.8618
			223.7	-46.9488
			223.6	-47.0577
			223.5	-47.1959
			223.4	-47.3614
			223.3	-47.5578
			223.2	-47.7712
			223.1	-47.9922
			223	-48.217
			222.9	-48.4292
			222.8	-48.6232
			222.7	-48.7958
			222.6	-48.9523
			222.5	-49.0913
			222.4	-49.2188
			222.3	-49.3346
			222.2	-49.4413
			222.1	-49.5445
			222	-49.6392
			221.9	-49.7186
			221.8	-49.7777
			221.7	-49.8346
			221.6	-49.9076
			221.5	-49.988
			221.4	-50.0716
			221.3	-50.1649
			221.2	-50.2616
			221.1	-50.3577
			221	-50.4501
			220.9	-50.5472
			220.8	-50.6427
			220.7	-50.7251
			220.6	-50.8006
			220.5	-50.8612
			220.4	-50.914
			220.3	-50.9562
			220.2	-50.9875
			220.1	-51.0249
			220	-51.0621
			219.9	-51.0999
			219.8	-51.1441
			219.7	-51.1868
			219.6	-51.2323
			219.5	-51.2831
			219.4	-51.3366
			219.3	-51.4103
			219.2	-51.5043
			219.1	-51.5905
			219	-51.6691
			218.9	-51.7349
			218.8	-51.7824
			218.7	-51.8171
			218.6	-51.8462
			218.5	-51.8921
			218.4	-51.9544
			218.3	-52.0081
			218.2	-52.0649
			218.1	-52.1341
			218	-52.2101
			217.9	-52.2844
			217.8	-52.3658
			217.7	-52.4681
			217.6	-52.5713
			217.5	-52.6842
			217.4	-52.8139
			217.3	-52.9444
			217.2	-53.0735
			217.1	-53.203
			217	-53.3289
			216.9	-53.46
			216.8	-53.5724
			216.7	-53.6516
			216.6	-53.6927
			216.5	-53.6971
			216.4	-53.6737
			216.3	-53.6438
			216.2	-53.6349
			216.1	-53.6613
			216	-53.6942
			215.9	-53.7217
			215.8	-53.7741
			215.7	-53.8536
			215.6	-53.9582
			215.5	-54.0901
			215.4	-54.2545
			215.3	-54.4478
			215.2	-54.6566
			215.1	-54.8768
			215	-55.111
			214.9	-55.3466
			214.8	-55.5877
			214.7	-55.8361
			214.6	-56.0903
			214.5	-56.3486
			214.4	-56.6057
			214.3	-56.8781
			214.2	-57.1627
			214.1	-57.4359
			214	-57.7086
			213.9	-58.0083
			213.8	-58.346
			213.7	-58.7054
			213.6	-59.0682
			213.5	-59.4542
			213.4	-59.8783
			213.3	-60.337
			213.2	-60.8518
			213.1	-61.4107
			213	-62.0041
			212.9	-62.6083
			212.8	-63.1945
			212.7	-63.7773
			212.6	-64.3794
			212.5	-64.9855
			212.4	-65.5875
			212.3	-66.1906
			212.2	-66.7826
			212.1	-67.3601
			212	-67.9214
			211.9	-68.4814
			211.8	-69.027
			211.7	-69.5727
			211.6	-70.1513
			211.5	-70.7756
			211.4	-71.4325
			211.3	-72.1309
			211.2	-72.8631
			211.1	-73.6271
			211	-74.4285
			210.9	-75.2683
			210.8	-76.1548
			210.7	-77.0846
			210.6	-78.0389
			210.5	-78.9996
			210.4	-79.948
			210.3	-80.9193
			210.2	-81.9275
			210.1	-82.9673
			210	-84.0339
			209.9	-85.1005
			209.8	-86.1513
			209.7	-87.1943
			209.6	-88.2286
			209.5	-89.2849
			209.4	-90.3539
			209.3	-91.4386
			209.2	-92.5154
			209.1	-93.5867
			209	-94.6541
			208.9	-95.7325
			208.8	-96.8211
			208.7	-97.9239
			208.6	-99.063
			208.5	-100.234
			208.4	-101.447
			208.3	-102.701
			208.2	-103.988
			208.1	-105.337
			208	-106.731
			207.9	-108.198
			207.8	-109.756
			207.7	-111.389
			207.6	-113.05
			207.5	-114.702
			207.4	-116.332
			207.3	-117.912
			207.2	-119.433
			207.1	-120.93
			207	-122.371
			206.9	-123.74
			206.8	-124.997
			206.7	-126.165
			206.6	-127.257
			206.5	-128.281
			206.4	-129.232
			206.3	-130.146
			206.2	-131.023
			206.1	-131.862
			206	-132.708
			205.9	-133.569
			205.8	-134.464
			205.7	-135.374
			205.6	-136.296
			205.5	-137.303
			205.4	-138.438
			205.3	-139.641
			205.2	-140.867
			205.1	-142.062
			205	-143.21
			204.9	-144.299
			204.8	-145.358
			204.7	-146.312
			204.6	-147.159
			204.5	-147.937
			204.4	-148.635
			204.3	-149.31
			204.2	-149.972
			204.1	-150.657
			204	-151.4
			203.9	-152.231
			203.8	-153.08
			203.7	-153.927
			203.6	-154.854
			203.5	-155.937
			203.4	-157.141
			203.3	-158.521
			203.2	-160.009
			203.1	-161.536
			203	-163.098
			202.9	-164.6
			202.8	-166.191
			202.7	-167.769
			202.6	-169.309
			202.5	-170.789
			202.4	-172.162
			202.3	-173.212
			202.2	-173.967
			202.1	-174.436
			202	-174.623
			201.9	-174.425
			201.8	-174.138
			201.7	-174.008
			201.6	-174.066
			201.5	-174.29
			201.4	-175.029
			201.3	-175.915
			201.2	-176.822
			201.1	-178.041
			201	-179.448
			200.9	-181.255
			200.8	-183.017
			200.7	-184.682
			200.6	-185.95
			200.5	-186.924
			200.4	-187.845
			200.3	-188.464
			200.2	-188.754
			200.1	-188.773
			200	-188.342

## Sheet: Figure 5C
hL1ORF1p-Dcons			volume	OD280	OD280	OD280		volume	MW
			(ml)	mAU		normalized		(ml)	kDa
Injection volume	80 µl
Superdex 75			7.01341	0.519	0.000519	0.000229213		10.3549	24.0603
			7.03998	0.596	0.000596	0.000263219		10.359	24.0868
			7.06655	0.741	0.000741	0.000327258		10.3631	24.1154
			7.09311	0.873	0.000873	0.000385555		10.3672	24.1407
			7.11968	1.052	0.001052	0.000464609		10.3712	24.164
			7.14624	1.288	0.001288	0.000568837		10.3753	24.1854
			7.17281	1.57	0.00157	0.00069338		10.3794	24.2066
			7.19938	1.874	0.001874	0.00082764		10.3835	24.2247
			7.22594	2.243	0.002243	0.000990606		10.3876	24.2428
			7.25251	2.606	0.002606	0.00115092		10.3917	24.2602
			7.27907	3.04	0.00304	0.0013426		10.3958	24.2764
			7.30564	3.457	0.003457	0.00152676		10.3999	24.2929
			7.33221	3.84	0.00384	0.00169591		10.404	24.3091
			7.35877	4.244	0.004244	0.00187433		10.4081	24.3231
			7.38534	4.621	0.004621	0.00204083		10.4122	24.3357
			7.4119	4.942	0.004942	0.0021826		10.4163	24.3474
			7.43847	5.229	0.005229	0.00230935		10.4204	24.3599
			7.46503	5.457	0.005457	0.00241005		10.4245	24.3715
			7.4916	5.637	0.005637	0.00248954		10.4286	24.383
			7.51817	5.735	0.005735	0.00253283		10.4327	24.3953
			7.54473	5.773	0.005773	0.00254961		10.4368	24.4081
			7.5713	5.716	0.005716	0.00252443		10.4409	24.4235
			7.59786	5.637	0.005637	0.00248954		10.445	24.4362
			7.62443	5.501	0.005501	0.00242948		10.4491	24.4455
			7.651	5.284	0.005284	0.00233364		10.4531	24.4554
			7.67756	5.044	0.005044	0.00222765		10.4572	24.4665
			7.70413	4.809	0.004809	0.00212386		10.4613	24.4775
			7.73069	4.546	0.004546	0.00200771		10.4654	24.4878
			7.75726	4.282	0.004282	0.00189112		10.4695	24.4976
			7.78383	4.002	0.004002	0.00176746		10.4736	24.5072
			7.81039	3.7	0.0037	0.00163408		10.4777	24.5157
			7.83696	3.405	0.003405	0.0015038		10.4818	24.5247
			7.86352	3.145	0.003145	0.00138897		10.4859	24.5335
			7.89009	2.919	0.002919	0.00128916		10.49	24.5416
			7.91666	2.702	0.002702	0.00119332		10.4941	24.5515
			7.94322	2.48	0.00248	0.00109528		10.4982	24.5607
			7.96979	2.277	0.002277	0.00100562		10.5023	24.5691
			7.99635	2.132	0.002132	0.000941584		10.5064	24.5758
			8.02292	2.017	0.002017	0.000890795		10.5105	24.5833
			8.04949	1.883	0.001883	0.000831615		10.5146	24.5899
			8.07605	1.745	0.001745	0.000770668		10.5187	24.5963
			8.10262	1.671	0.001671	0.000737986		10.5228	24.6034
			8.12918	1.601	0.001601	0.000707071		10.5269	24.6098
			8.15575	1.565	0.001565	0.000691172		10.531	24.6144
			8.18232	1.547	0.001547	0.000683222		10.535	24.6164
			8.20888	1.556	0.001556	0.000687197		10.5391	24.6181
			8.23545	1.592	0.001592	0.000703096		10.5432	24.6185
			8.26201	1.693	0.001693	0.000747702		10.5473	24.6129
			8.28858	1.807	0.001807	0.00079805
			8.31515	1.976	0.001976	0.000872687
			8.34171	2.171	0.002171	0.000958808
			8.36828	2.407	0.002407	0.00106304
			8.39484	2.674	0.002674	0.00118095
			8.42141	2.99	0.00299	0.00132051
			8.44798	3.346	0.003346	0.00147774
			8.47454	3.7	0.0037	0.00163408
			8.50111	4.082	0.004082	0.00180279
			8.52767	4.481	0.004481	0.001979
			8.55424	4.904	0.004904	0.00216582
			8.58081	5.326	0.005326	0.00235219
			8.60737	5.782	0.005782	0.00255358
			8.63394	6.206	0.006206	0.00274084
			8.6605	6.634	0.006634	0.00292986
			8.68707	7.07	0.00707	0.00312242
			8.71364	7.523	0.007523	0.00332248
			8.7402	7.961	0.007961	0.00351592
			8.76677	8.442	0.008442	0.00372835
			8.79333	8.958	0.008958	0.00395624
			8.8199	9.519	0.009519	0.004204
			8.84646	10.171	0.010171	0.00449196
			8.87303	10.897	0.010897	0.00481259
			8.8996	11.76	0.01176	0.00519373
			8.92616	12.777	0.012777	0.00564288
			8.95273	13.952	0.013952	0.00616181
			8.97929	15.245	0.015245	0.00673285
			9.00586	16.699	0.016699	0.007375
			9.03243	18.349	0.018349	0.00810372
			9.05899	20.097	0.020097	0.00887571
			9.08556	21.974	0.021974	0.00970467
			9.11212	23.95	0.02395	0.0105774
			9.13869	26.006	0.026006	0.0114854
			9.16526	28.145	0.028145	0.0124301
			9.19182	30.358	0.030358	0.0134074
			9.21839	32.648	0.032648	0.0144188
			9.24495	35.036	0.035036	0.0154734
			9.27152	37.515	0.037515	0.0165683
			9.29809	40.149	0.040149	0.0177315
			9.32465	42.909	0.042909	0.0189505
			9.35122	45.802	0.045802	0.0202282
			9.37778	48.85	0.04885	0.0215743
			9.40435	51.931	0.051931	0.022935
			9.43092	55.098	0.055098	0.0243337
			9.45748	58.218	0.058218	0.0257116
			9.48405	61.211	0.061211	0.0270334
			9.51061	64.105	0.064105	0.0283116
			9.53718	66.763	0.066763	0.0294854
			9.56375	69.201	0.069201	0.0305622
			9.59031	71.376	0.071376	0.0315227
			9.61688	73.295	0.073295	0.0323703
			9.64344	75.186	0.075186	0.0332054
			9.67001	77.011	0.077011	0.0340114
			9.69658	79.101	0.079101	0.0349344
			9.72314	81.962	0.081962	0.036198
			9.74971	86.45	0.08645	0.0381801
			9.77627	94.811	0.094811	0.0418727
			9.80284	110.469	0.110469	0.0487879
			9.82941	138.403	0.138403	0.0611248
			9.85597	184.754	0.184754	0.0815954
			9.88254	253.091	0.253091	0.111776
			9.9091	344.43	0.34443	0.152115
			9.93567	456.142	0.456142	0.201452
			9.96224	582.854	0.582854	0.257414
			9.9888	722.128	0.722128	0.318923
			10.0154	868.683	0.868683	0.383648
			10.0419	1014.34	1.01434	0.447979
			10.0685	1154.47	1.15447	0.509863
			10.0951	1286.01	1.28601	0.567958
			10.1216	1412.44	1.41244	0.623795
			10.1482	1534.5	1.5345	0.677703
			10.1748	1650.97	1.65097	0.72914
			10.2013	1760.39	1.76039	0.777464
			10.2279	1862.46	1.86246	0.822544
			10.2545	1951.21	1.95121	0.861739
			10.281	2023.44	2.02344	0.893641
			10.3076	2085.04	2.08504	0.920843
			10.3342	2136.77	2.13677	0.94369
			10.3607	2180.11	2.18011	0.962833
			10.3873	2214.46	2.21446	0.978
			10.4139	2242.12	2.24212	0.990217
			10.4404	2259.84	2.25984	0.998046
			10.467	2264.27	2.26427	1
			10.4936	2250.77	2.25077	0.99404
			10.5201	2221.31	2.22131	0.981026
			10.5467	2173.18	2.17318	0.95977
			10.5733	2108.78	2.10878	0.931329
			10.5998	2034.68	2.03468	0.898602
			10.6264	1957.29	1.95729	0.864426
			10.653	1880.02	1.88002	0.8303
			10.6795	1807.35	1.80735	0.798203
			10.7061	1742.43	1.74243	0.769531
			10.7326	1684.63	1.68463	0.744004
			10.7592	1632.44	1.63244	0.720956
			10.7858	1586.16	1.58616	0.700517
			10.8123	1544.6	1.5446	0.682162
			10.8389	1507.98	1.50798	0.665989
			10.8655	1474.57	1.47457	0.651233
			10.892	1446.08	1.44608	0.638651
			10.9186	1422.95	1.42295	0.628435
			10.9452	1404.54	1.40454	0.620305
			10.9717	1391.64	1.39164	0.614609
			10.9983	1381.92	1.38192	0.610315
			11.0249	1373.58	1.37358	0.606632
			11.0514	1363.73	1.36373	0.602283
			11.078	1344.03	1.34403	0.593582
			11.1046	1306.27	1.30627	0.576906
			11.1311	1242.63	1.24263	0.548799
			11.1577	1151.89	1.15189	0.508726
			11.1843	1044.3	1.0443	0.461208
			11.2108	931.587	0.931587	0.411429
			11.2374	826.253	0.826253	0.364909
			11.264	733.731	0.733731	0.324047
			11.2905	654.853	0.654853	0.289212
			11.3171	589.931	0.589931	0.260539
			11.3437	536.064	0.536064	0.236749
			11.3702	491.01	0.49101	0.216851
			11.3968	453.166	0.453166	0.200138
			11.4234	420.657	0.420657	0.18578
			11.4499	392.517	0.392517	0.173353
			11.4765	367.897	0.367897	0.162479
			11.5031	345.705	0.345705	0.152678
			11.5296	325.676	0.325676	0.143833
			11.5562	307.331	0.307331	0.135731
			11.5828	290.507	0.290507	0.128301
			11.6093	274.929	0.274929	0.121421
			11.6359	260.302	0.260302	0.114961
			11.6625	246.555	0.246555	0.108889
			11.689	233.529	0.233529	0.103137
			11.7156	221.153	0.221153	0.0976708
			11.7422	209.41	0.20941	0.0924846
			11.7687	198.108	0.198108	0.0874931
			11.7953	187.255	0.187255	0.0826999
			11.8219	176.864	0.176864	0.0781108
			11.8484	166.881	0.166881	0.0737019
			11.875	157.327	0.157327	0.0694824
			11.9016	148.16	0.14816	0.0654339
			11.9281	139.344	0.139344	0.0615404
			11.9547	130.972	0.130972	0.0578429
			11.9812	123	0.123	0.0543221
			12.0078	115.404	0.115404	0.0509674
			12.0344	108.207	0.108207	0.0477889
			12.0609	101.455	0.101455	0.0448069
			12.0875	95.105	0.095105	0.0420025
			12.1141	89.136	0.089136	0.0393663
			12.1406	83.594	0.083594	0.0369187
			12.1672	78.39	0.07839	0.0346204
			12.1938	73.559	0.073559	0.0324869
			12.2203	69.101	0.069101	0.030518
			12.2469	64.969	0.064969	0.0286931
			12.2735	61.176	0.061176	0.027018
			12.3	57.681	0.057681	0.0254744
			12.3266	54.456	0.054456	0.0240501
			12.3532	51.517	0.051517	0.0227521
			12.3797	48.8	0.0488	0.0215522
			12.4063	46.268	0.046268	0.020434
			12.4329	43.935	0.043935	0.0194036
			12.4594	41.797	0.041797	0.0184594
			12.486	39.813	0.039813	0.0175832
			12.5126	37.971	0.037971	0.0167696
			12.5391	36.268	0.036268	0.0160175
			12.5657	34.705	0.034705	0.0153272
			12.5923	33.27	0.03327	0.0146935
			12.6188	31.918	0.031918	0.0140964
			12.6454	30.687	0.030687	0.0135527
			12.672	29.518	0.029518	0.0130364
			12.6985	28.448	0.028448	0.0125639
			12.7251	27.454	0.027454	0.0121249
			12.7517	26.513	0.026513	0.0117093
			12.7782	25.63	0.02563	0.0113193
			12.8048	24.822	0.024822	0.0109625
			12.8314	24.05	0.02405	0.0106215
			12.8579	23.295	0.023295	0.0102881
			12.8845	22.593	0.022593	0.00997805
			12.9111	21.933	0.021933	0.00968657
			12.9376	21.283	0.021283	0.0093995
			12.9642	20.657	0.020657	0.00912303
			12.9908	20.059	0.020059	0.00885893
			13.0173	19.458	0.019458	0.0085935
			13.0439	18.862	0.018862	0.00833028
			13.0705	18.317	0.018317	0.00808958
			13.097	17.794	0.017794	0.0078586
			13.1236	17.253	0.017253	0.00761967
			13.1502	16.697	0.016697	0.00737412
			13.1767	16.153	0.016153	0.00713387
			13.2033	15.609	0.015609	0.00689361
			13.2298	15.084	0.015084	0.00666175
			13.2564	14.565	0.014565	0.00643254
			13.283	14.057	0.014057	0.00620818
			13.3095	13.515	0.013515	0.00596881
			13.3361	13.019	0.013019	0.00574976
			13.3627	12.52	0.01252	0.00552938
			13.3892	11.994	0.011994	0.00529707
			13.4158	11.544	0.011544	0.00509833
			13.4424	11.1	0.0111	0.00490224
			13.4689	10.656	0.010656	0.00470615
			13.4955	10.236	0.010236	0.00452066
			13.5221	9.815	0.009815	0.00433473
			13.5486	9.42	0.00942	0.00416028
			13.5752	9.06	0.00906	0.00400129
			13.6018	8.738	0.008738	0.00385908
			13.6283	8.383	0.008383	0.0037023
			13.6549	8.06	0.00806	0.00355965
			13.6815	7.768	0.007768	0.00343069
			13.708	7.489	0.007489	0.00330747
			13.7346	7.173	0.007173	0.00316791
			13.7612	6.903	0.006903	0.00304866
			13.7877	6.653	0.006653	0.00293825
			13.8143	6.419	0.006419	0.00283491
			13.8409	6.169	0.006169	0.0027245
			13.8674	5.946	0.005946	0.00262601
			13.894	5.759	0.005759	0.00254342
			13.9206	5.544	0.005544	0.00244847
			13.9471	5.306	0.005306	0.00234336
			13.9737	5.121	0.005121	0.00226166
			14.0003	4.947	0.004947	0.00218481
			14.0268	4.762	0.004762	0.00210311
			14.0534	4.613	0.004613	0.0020373
			14.08	4.506	0.004506	0.00199005
			14.1065	4.358	0.004358	0.00192468
			14.1331	4.174	0.004174	0.00184342
			14.1597	4.036	0.004036	0.00178247
			14.1862	3.944	0.003944	0.00174184
			14.2128	3.855	0.003855	0.00170254
			14.2394	3.731	0.003731	0.00164777
			14.2659	3.623	0.003623	0.00160007
			14.2925	3.536	0.003536	0.00156165
			14.3191	3.444	0.003444	0.00152102
			14.3456	3.369	0.003369	0.0014879
			14.3722	3.28	0.00328	0.00144859
			14.3988	3.198	0.003198	0.00141238
			14.4253	3.13	0.00313	0.00138234
			14.4519	3.057	0.003057	0.0013501
			14.4784	2.991	0.002991	0.00132096
			14.505	2.929	0.002929	0.00129357
			14.5316	2.883	0.002883	0.00127326
			14.5581	2.814	0.002814	0.00124278
			14.5847	2.768	0.002768	0.00122247
			14.6113	2.716	0.002716	0.0011995
			14.6378	2.666	0.002666	0.00117742
			14.6644	2.634	0.002634	0.00116329
			14.691	2.576	0.002576	0.00113767
			14.7175	2.522	0.002522	0.00111382
			14.7441	2.48	0.00248	0.00109528
			14.7707	2.455	0.002455	0.00108423
			14.7972	2.421	0.002421	0.00106922
			14.8238	2.359	0.002359	0.00104184
			14.8504	2.346	0.002346	0.0010361
			14.8769	2.321	0.002321	0.00102505
			14.9035	2.286	0.002286	0.0010096
			14.9301	2.252	0.002252	0.000994581
			14.9566	2.212	0.002212	0.000976915
			14.9832	2.212	0.002212	0.000976915
			15.0098	2.185	0.002185	0.000964991
			15.0363	2.152	0.002152	0.000950417
			15.0629	2.131	0.002131	0.000941142
			15.0895	2.138	0.002138	0.000944234
			15.116	2.133	0.002133	0.000942025
			15.1426	2.108	0.002108	0.000930984
			15.1692	2.075	0.002075	0.00091641
			15.1957	2.068	0.002068	0.000913319
			15.2223	2.066	0.002066	0.000912435
			15.2489	2.04	0.00204	0.000900953
			15.2754	2.005	0.002005	0.000885495
			15.302	1.999	0.001999	0.000882845
			15.3286	1.99	0.00199	0.00087887
			15.3551	1.965	0.001965	0.000867829
			15.3817	1.956	0.001956	0.000863855
			15.4083	1.948	0.001948	0.000860321
			15.4348	1.9	0.0019	0.000839123
			15.4614	1.89	0.00189	0.000834706
			15.488	1.917	0.001917	0.00084663
			15.5145	1.905	0.001905	0.000841331
			15.5411	1.863	0.001863	0.000822782
			15.5677	1.835	0.001835	0.000810416
			15.5942	1.826	0.001826	0.000806441
			15.6208	1.802	0.001802	0.000795841
			15.6474	1.798	0.001798	0.000794075
			15.6739	1.761	0.001761	0.000777734
			15.7005	1.753	0.001753	0.000774201
			15.727	1.734	0.001734	0.00076581
			15.7536	1.697	0.001697	0.000749469
			15.7802	1.696	0.001696	0.000749027
			15.8067	1.715	0.001715	0.000757419
			15.8333	1.711	0.001711	0.000755652
			15.8599	1.682	0.001682	0.000742844
			15.8864	1.658	0.001658	0.000732245
			15.913	1.655	0.001655	0.00073092
			15.9396	1.655	0.001655	0.00073092
			15.9661	1.646	0.001646	0.000726945
			15.9927	1.632	0.001632	0.000720762
			16.0193	1.613	0.001613	0.000712371
			16.0458	1.637	0.001637	0.00072297
			16.0724	1.638	0.001638	0.000723412
			16.099	1.598	0.001598	0.000705746
			16.1255	1.596	0.001596	0.000704863
			16.1521	1.588	0.001588	0.00070133
			16.1787	1.6	0.0016	0.00070663
			16.2052	1.603	0.001603	0.000707954
			16.2318	1.592	0.001592	0.000703096
			16.2584	1.555	0.001555	0.000686756
			16.2849	1.57	0.00157	0.00069338
			16.3115	1.562	0.001562	0.000689847
			16.3381	1.578	0.001578	0.000696913
			16.3646	1.566	0.001566	0.000691614
			16.3912	1.551	0.001551	0.000684989
			16.4178	1.526	0.001526	0.000673948
			16.4443	1.513	0.001513	0.000668207
			16.4709	1.531	0.001531	0.000676156
			16.4975	1.555	0.001555	0.000686756
			16.524	1.542	0.001542	0.000681014
			16.5506	1.538	0.001538	0.000679248
			16.5772	1.567	0.001567	0.000692055
			16.6037	1.547	0.001547	0.000683222
			16.6303	1.538	0.001538	0.000679248
			16.6569	1.526	0.001526	0.000673948
			16.6834	1.52	0.00152	0.000671298
			16.71	1.52	0.00152	0.000671298
			16.7366	1.51	0.00151	0.000666882
			16.7631	1.525	0.001525	0.000673506
			16.7897	1.536	0.001536	0.000678364
			16.8163	1.523	0.001523	0.000672623
			16.8428	1.503	0.001503	0.00066379
			16.8694	1.509	0.001509	0.00066644
			16.896	1.517	0.001517	0.000669973
			16.9225	1.511	0.001511	0.000667323
			16.9491	1.509	0.001509	0.00066644
			16.9756	1.484	0.001484	0.000655399

## Sheet: Figure 5D
hL1ORF1p-cc			wavelength	MRE (Fig. 4A)			Thermal melting		temperature	MRE
			(nm)	(deg/(cm*M))			wavelength		deg. C	(deg/(cm*M))
MW (kDa)	12.5731		240	-21.657			222 nm		15	-312.676
Concentration (mM)	0.0119302		239.9	-22.0342					15.5	-312.174
Peptide bonds	103		239.8	-22.477					16	-311.506
			239.7	-22.984					16.5	-310.779
			239.6	-23.5548					17	-309.911
			239.5	-24.1885					17.5	-308.882
			239.4	-24.8794					18	-308.17
			239.3	-25.6248					18.5	-307.198
			239.2	-26.4169					19	-306.217
			239.1	-27.243					19.5	-305.256
			239	-28.0855					20	-304.617
			238.9	-28.9283					20.5	-303.782
			238.8	-29.7582					21	-303.219
			238.7	-30.5652					21.5	-302.819
			238.6	-31.3816					22	-301.861
			238.5	-32.2144					22.5	-301.181
			238.4	-33.0697					23	-300.858
			238.3	-33.9386					23.5	-300.512
			238.2	-34.8268					24	-299.998
			238.1	-35.748					24.5	-299.593
			238	-36.6961					25	-298.922
			237.9	-37.6752					25.5	-298.371
			237.8	-38.6791					26	-297.626
			237.7	-39.6981					26.5	-297.161
			237.6	-40.7405					27	-296.621
			237.5	-41.8036					27.5	-295.905
			237.4	-42.8816					28	-294.852
			237.3	-43.9811					28.5	-293.773
			237.2	-45.1051					29	-292.764
			237.1	-46.2534					29.5	-291.615
			237	-47.421					30	-290.671
			236.9	-48.6092					30.5	-289.077
			236.8	-49.8136					31	-287.564
			236.7	-51.0333					31.5	-285.776
			236.6	-52.2673					32	-284.207
			236.5	-53.5181					32.5	-282.339
			236.4	-54.7907					33	-280.751
			236.3	-56.0892					33.5	-278.708
			236.2	-57.4128					34	-276.401
			236.1	-58.7646					34.5	-274.316
			236	-60.1456					35	-272.288
			235.9	-61.5503					35.5	-269.998
			235.8	-62.9845					36	-267.813
			235.7	-64.4548					36.5	-265.481
			235.6	-65.9621					37	-263.125
			235.5	-67.5022					37.5	-260.877
			235.4	-69.0657					38	-258.741
			235.3	-70.6522					38.5	-256.575
			235.2	-72.2698					39	-254.614
			235.1	-73.9047					39.5	-252.444
			235	-75.5521					40	-250.474
			234.9	-77.2199					40.5	-248.929
			234.8	-78.9007					41	-247.379
			234.7	-80.5893					41.5	-245.908
			234.6	-82.2859					42	-244.314
			234.5	-83.9924					42.5	-242.693
			234.4	-85.7176					43	-241.137
			234.3	-87.4632					43.5	-239.539
			234.2	-89.2267					44	-238.475
			234.1	-91.0048					44.5	-237.325
			234	-92.8025					45	-236.034
			233.9	-94.6164					45.5	-234.897
			233.8	-96.4532					46	-233.893
			233.7	-98.3184					46.5	-233.002
			233.6	-100.209					47	-232.078
			233.5	-102.122					47.5	-231.346
			233.4	-104.053					48	-230.592
			233.3	-106.005					48.5	-229.85
			233.2	-107.987					49	-228.892
			233.1	-110					49.5	-227.921
			233	-112.032					50	-227.041
			232.9	-114.088					50.5	-226.317
			232.8	-116.165					51	-225.461
			232.7	-118.252					51.5	-224.656
			232.6	-120.358					52	-224.115
			232.5	-122.481					52.5	-223.302
			232.4	-124.61					53	-222.515
			232.3	-126.754					53.5	-221.724
			232.2	-128.912					54	-220.985
			232.1	-131.088					54.5	-220.399
			232	-133.292					55	-219.577
			231.9	-135.516					55.5	-218.759
			231.8	-137.764					56	-218.483
			231.7	-140.038					56.5	-217.688
			231.6	-142.349					57	-217.222
			231.5	-144.686					57.5	-216.64
			231.4	-147.06					58	-215.588
			231.3	-149.472					58.5	-214.484
			231.2	-151.908					59	-214
			231.1	-154.359					59.5	-214.073
			231	-156.813					60	-213.324
			230.9	-159.28					60.5	-211.983
			230.8	-161.769					61	-210.57
			230.7	-164.272					61.5	-208.849
			230.6	-166.78					62	-206.884
			230.5	-169.286					62.5	-204.685
			230.4	-171.791					63	-202.114
			230.3	-174.293					63.5	-199.54
			230.2	-176.791					64	-196.249
			230.1	-179.276					64.5	-192.775
			230	-181.755					65	-188.968
			229.9	-184.228					65.5	-184.633
			229.8	-186.688					66	-180.416
			229.7	-189.147					66.5	-175.462
			229.6	-191.601					67	-170.173
			229.5	-194.05					67.5	-164.449
			229.4	-196.49					68	-158.572
			229.3	-198.92					68.5	-151.774
			229.2	-201.343					69	-145.127
			229.1	-203.764					69.5	-138.363
			229	-206.183					70	-131.584
			228.9	-208.599					70.5	-125.061
			228.8	-211.01					71	-118.702
			228.7	-213.405					71.5	-112.204
			228.6	-215.788					72	-105.215
			228.5	-218.158					72.5	-98.5373
			228.4	-220.516					73	-92.4477
			228.3	-222.846					73.5	-86.3133
			228.2	-225.151					74	-81.0802
			228.1	-227.426					74.5	-76.2261
			228	-229.669					75	-72.0083
			227.9	-231.889					75.5	-68.0402
			227.8	-234.095					76	-64.5675
			227.7	-236.29					76.5	-61.9087
			227.6	-238.466					77	-59.4889
			227.5	-240.617					77.5	-57.5725
			227.4	-242.745					78	-56.461
			227.3	-244.852					78.5	-55.481
			227.2	-246.929					79	-54.5748
			227.1	-248.981					79.5	-53.8609
			227	-251.004					80	-53.7509
			226.9	-252.994					80.5	-53.3103
			226.8	-254.96					81	-53.2718
			226.7	-256.909					81.5	-53.247
			226.6	-258.824					82	-53.0853
			226.5	-260.704					82.5	-53.075
			226.4	-262.546					83	-52.8707
			226.3	-264.339					83.5	-52.8986
			226.2	-266.078					84	-52.6495
			226.1	-267.765					84.5	-52.437
			226	-269.416					85	-52.3113
			225.9	-271.033					85.5	-52.1257
			225.8	-272.621					86	-52.2999
			225.7	-274.171					86.5	-52.1339
			225.6	-275.689					87	-52.2569
			225.5	-277.181					87.5	-51.8167
			225.4	-278.647					88	-51.7282
			225.3	-280.075					88.5	-51.685
			225.2	-281.455					89	-51.4512
			225.1	-282.793					89.5	-51.3836
			225	-284.091					90	-51.4772
			224.9	-285.339					90.5	-51.3724
			224.8	-286.535					91	-51.1711
			224.7	-287.678					91.5	-51.2155
			224.6	-288.77					92	-51.2113
			224.5	-289.806					92.5	-50.7669
			224.4	-290.8					93	-50.6217
			224.3	-291.767					93.5	-50.4187
			224.2	-292.696					94	-50.4456
			224.1	-293.593					94.5	-50.3276
			224	-294.462					95	-50.0753
			223.9	-295.314
			223.8	-296.151
			223.7	-296.973
			223.6	-297.796
			223.5	-298.621
			223.4	-299.43
			223.3	-300.224
			223.2	-300.999
			223.1	-301.748
			223	-302.471
			222.9	-303.164
			222.8	-303.824
			222.7	-304.437
			222.6	-304.987
			222.5	-305.473
			222.4	-305.902
			222.3	-306.275
			222.2	-306.602
			222.1	-306.889
			222	-307.142
			221.9	-307.373
			221.8	-307.576
			221.7	-307.76
			221.6	-307.934
			221.5	-308.107
			221.4	-308.264
			221.3	-308.399
			221.2	-308.52
			221.1	-308.626
			221	-308.706
			220.9	-308.759
			220.8	-308.779
			220.7	-308.768
			220.6	-308.717
			220.5	-308.622
			220.4	-308.482
			220.3	-308.294
			220.2	-308.062
			220.1	-307.797
			220	-307.492
			219.9	-307.159
			219.8	-306.808
			219.7	-306.439
			219.6	-306.061
			219.5	-305.682
			219.4	-305.311
			219.3	-304.957
			219.2	-304.615
			219.1	-304.28
			219	-303.944
			218.9	-303.61
			218.8	-303.285
			218.7	-302.982
			218.6	-302.677
			218.5	-302.366
			218.4	-302.044
			218.3	-301.693
			218.2	-301.297
			218.1	-300.873
			218	-300.43
			217.9	-299.957
			217.8	-299.435
			217.7	-298.857
			217.6	-298.237
			217.5	-297.593
			217.4	-296.922
			217.3	-296.23
			217.2	-295.52
			217.1	-294.79
			217	-294.05
			216.9	-293.293
			216.8	-292.515
			216.7	-291.736
			216.6	-290.961
			216.5	-290.203
			216.4	-289.47
			216.3	-288.761
			216.2	-288.057
			216.1	-287.364
			216	-286.666
			215.9	-285.979
			215.8	-285.3
			215.7	-284.634
			215.6	-283.97
			215.5	-283.285
			215.4	-282.561
			215.3	-281.828
			215.2	-281.107
			215.1	-280.396
			215	-279.692
			214.9	-279.009
			214.8	-278.342
			214.7	-277.692
			214.6	-277.066
			214.5	-276.469
			214.4	-275.929
			214.3	-275.441
			214.2	-274.999
			214.1	-274.605
			214	-274.234
			213.9	-273.893
			213.8	-273.59
			213.7	-273.303
			213.6	-273.028
			213.5	-272.787
			213.4	-272.564
			213.3	-272.366
			213.2	-272.174
			213.1	-271.99
			213	-271.808
			212.9	-271.626
			212.8	-271.452
			212.7	-271.293
			212.6	-271.143
			212.5	-271.006
			212.4	-270.881
			212.3	-270.768
			212.2	-270.689
			212.1	-270.659
			212	-270.664
			211.9	-270.683
			211.8	-270.727
			211.7	-270.797
			211.6	-270.878
			211.5	-270.989
			211.4	-271.129
			211.3	-271.302
			211.2	-271.542
			211.1	-271.863
			211	-272.255
			210.9	-272.708
			210.8	-273.189
			210.7	-273.7
			210.6	-274.211
			210.5	-274.711
			210.4	-275.216
			210.3	-275.723
			210.2	-276.224
			210.1	-276.721
			210	-277.196
			209.9	-277.633
			209.8	-278.01
			209.7	-278.317
			209.6	-278.558
			209.5	-278.745
			209.4	-278.873
			209.3	-278.947
			209.2	-278.972
			209.1	-278.975
			209	-278.99
			208.9	-279.017
			208.8	-279.037
			208.7	-279.049
			208.6	-279.06
			208.5	-279.045
			208.4	-279
			208.3	-278.93
			208.2	-278.822
			208.1	-278.661
			208	-278.458
			207.9	-278.216
			207.8	-277.883
			207.7	-277.433
			207.6	-276.841
			207.5	-276.075
			207.4	-275.163
			207.3	-274.142
			207.2	-273.038
			207.1	-271.843
			207	-270.565
			206.9	-269.222
			206.8	-267.796
			206.7	-266.298
			206.6	-264.746
			206.5	-263.12
			206.4	-261.438
			206.3	-259.71
			206.2	-257.945
			206.1	-256.118
			206	-254.255
			205.9	-252.319
			205.8	-250.277
			205.7	-248.119
			205.6	-245.85
			205.5	-243.475
			205.4	-240.965
			205.3	-238.309
			205.2	-235.467
			205.1	-232.431
			205	-229.249
			204.9	-225.894
			204.8	-222.399
			204.7	-218.752
			204.6	-214.911
			204.5	-210.876
			204.4	-206.655
			204.3	-202.286
			204.2	-197.822
			204.1	-193.298
			204	-188.751
			203.9	-184.171
			203.8	-179.615
			203.7	-175.047
			203.6	-170.478
			203.5	-165.835
			203.4	-161.064
			203.3	-156.232
			203.2	-151.417
			203.1	-146.569
			203	-141.684
			202.9	-136.769
			202.8	-131.851
			202.7	-126.919
			202.6	-121.987
			202.5	-117.093
			202.4	-112.276
			202.3	-107.39
			202.2	-102.311
			202.1	-97.0538
			202	-91.5371
			201.9	-85.9007
			201.8	-80.2306
			201.7	-74.4493
			201.6	-68.5372
			201.5	-62.1831
			201.4	-55.3186
			201.3	-48.0177
			201.2	-40.3605
			201.1	-32.3464
			201	-24.2588
			200.9	-16.1898
			200.8	-7.90994
			200.7	0.602246
			200.6	9.42055
			200.5	18.7145
			200.4	28.2753
			200.3	38.0713
			200.2	48.0097
			200.1	58.3236
			200	69.215

## Sheet: Figure 5E
hL1ORF1p-ccD(91-93)			wavelength	MRE			Thermal melting		temperature	MRE
			(nm)	(deg/(cm*M))			wavelength		deg C	(deg/(cm*M))
MW (kDa)	12.1997		240	-17.8697			222 nm		15	-254.861
Concentration (mM)	0.0122954		239.9	-18.2051					15.5	-254.518
Peptide bonds	100		239.8	-18.6015					16	-254.211
			239.7	-19.0594					16.5	-253.853
			239.6	-19.57					17	-253.582
			239.5	-20.1314					17.5	-253.252
			239.4	-20.7414					18	-252.927
			239.3	-21.3968					18.5	-252.692
			239.2	-22.0881					19	-252.53
			239.1	-22.8048					19.5	-252.426
			239	-23.5407					20	-252.319
			238.9	-24.2878					20.5	-252.445
			238.8	-25.044					21	-252.772
			238.7	-25.7969					21.5	-253.318
			238.6	-26.5732					22	-253.869
			238.5	-27.3591					22.5	-254.68
			238.4	-28.1604					23	-255.677
			238.3	-28.9843					23.5	-256.486
			238.2	-29.8402					24	-257.373
			238.1	-30.7137					24.5	-258.3
			238	-31.6021					25	-259.011
			237.9	-32.511					25.5	-259.817
			237.8	-33.4344					26	-260.347
			237.7	-34.3651					26.5	-260.856
			237.6	-35.309					27	-261.463
			237.5	-36.2753					27.5	-261.974
			237.4	-37.2638					28	-261.937
			237.3	-38.2609					28.5	-261.906
			237.2	-39.2567					29	-261.894
			237.1	-40.26					29.5	-261.723
			237	-41.2671					30	-261.376
			236.9	-42.2717					30.5	-260.863
			236.8	-43.2679					31	-260.217
			236.7	-44.2671					31.5	-259.607
			236.6	-45.2719					32	-258.849
			236.5	-46.2847					32.5	-257.963
			236.4	-47.3123					33	-257.42
			236.3	-48.3501					33.5	-256.3
			236.2	-49.3968					34	-255.324
			236.1	-50.4535					34.5	-254.295
			236	-51.5278					35	-253.234
			235.9	-52.6244					35.5	-252.278
			235.8	-53.7557					36	-251.097
			235.7	-54.9199					36.5	-249.502
			235.6	-56.1166					37	-247.792
			235.5	-57.3392					37.5	-245.788
			235.4	-58.5904					38	-243.843
			235.3	-59.8813					38.5	-241.983
			235.2	-61.2149					39	-240.231
			235.1	-62.5866					39.5	-238.013
			235	-63.9902					40	-235.725
			234.9	-65.4119					40.5	-233.777
			234.8	-66.8495					41	-231.844
			234.7	-68.3069					41.5	-230.104
			234.6	-69.7776					42	-228.443
			234.5	-71.2672					42.5	-226.515
			234.4	-72.7809					43	-224.937
			234.3	-74.3188					43.5	-223.388
			234.2	-75.8647					44	-221.601
			234.1	-77.4168					44.5	-220.036
			234	-78.9778					45	-218.916
			233.9	-80.5575					45.5	-217.514
			233.8	-82.1528					46	-216.614
			233.7	-83.7697					46.5	-215.5
			233.6	-85.4134					47	-214.699
			233.5	-87.0913					47.5	-213.859
			233.4	-88.796					48	-212.267
			233.3	-90.5235					48.5	-210.802
			233.2	-92.2713					49	-209.722
			233.1	-94.0362					49.5	-208.458
			233	-95.8214					50	-207.254
			232.9	-97.6245					50.5	-206.047
			232.8	-99.4439					51	-204.725
			232.7	-101.28					51.5	-203.209
			232.6	-103.127					52	-201.825
			232.5	-104.975					52.5	-200.633
			232.4	-106.832					53	-199.365
			232.3	-108.703					53.5	-198.346
			232.2	-110.59					54	-196.884
			232.1	-112.489					54.5	-195.269
			232	-114.382					55	-194.08
			231.9	-116.265					55.5	-192.623
			231.8	-118.145					56	-191.323
			231.7	-120.026					56.5	-190.348
			231.6	-121.921					57	-189.519
			231.5	-123.851					57.5	-188.625
			231.4	-125.806					58	-187.848
			231.3	-127.786					58.5	-187.118
			231.2	-129.778					59	-186.519
			231.1	-131.777					59.5	-185.88
			231	-133.772					60	-184.912
			230.9	-135.778					60.5	-184.139
			230.8	-137.799					61	-183.587
			230.7	-139.832					61.5	-182.68
			230.6	-141.87					62	-181.718
			230.5	-143.914					62.5	-180.683
			230.4	-145.965					63	-179.485
			230.3	-148.016					63.5	-178.435
			230.2	-150.056					64	-177.241
			230.1	-152.095					64.5	-176.2
			230	-154.134					65	-174.795
			229.9	-156.168					65.5	-173.505
			229.8	-158.192					66	-171.731
			229.7	-160.204					66.5	-170.348
			229.6	-162.202					67	-168.942
			229.5	-164.189					67.5	-167.328
			229.4	-166.169					68	-165.553
			229.3	-168.136					68.5	-163.85
			229.2	-170.093					69	-161.793
			229.1	-172.044					69.5	-160.329
			229	-173.981					70	-158.675
			228.9	-175.905					70.5	-156.693
			228.8	-177.818					71	-154.542
			228.7	-179.729					71.5	-151.918
			228.6	-181.641					72	-148.987
			228.5	-183.545					72.5	-145.617
			228.4	-185.44					73	-142.272
			228.3	-187.314					73.5	-138.69
			228.2	-189.153					74	-134.987
			228.1	-190.969					74.5	-130.983
			228	-192.757					75	-127.07
			227.9	-194.517					75.5	-122.943
			227.8	-196.245					76	-119.04
			227.7	-197.952					76.5	-115.234
			227.6	-199.631					77	-110.926
			227.5	-201.275					77.5	-106.891
			227.4	-202.887					78	-102.571
			227.3	-204.474					78.5	-98.864
			227.2	-206.021					79	-95.1342
			227.1	-207.528					79.5	-91.632
			227	-209.002					80	-88.0404
			226.9	-210.452					80.5	-85.3288
			226.8	-211.897					81	-82.4603
			226.7	-213.348					81.5	-80.338
			226.6	-214.817					82	-77.257
			226.5	-216.297					82.5	-74.6965
			226.4	-217.781					83	-72.0787
			226.3	-219.269					83.5	-69.4737
			226.2	-220.759					84	-67.5474
			226.1	-222.242					84.5	-65.6955
			226	-223.722					85	-63.8373
			225.9	-225.196					85.5	-62.4956
			225.8	-226.659					86	-61.3803
			225.7	-228.106					86.5	-60.0425
			225.6	-229.525					87	-58.9213
			225.5	-230.91					87.5	-58.0599
			225.4	-232.265					88	-57.5649
			225.3	-233.586					88.5	-56.9897
			225.2	-234.876					89	-56.1859
			225.1	-236.135					89.5	-55.7001
			225	-237.372					90	-55.159
			224.9	-238.59					90.5	-55.0922
			224.8	-239.764					91	-54.9698
			224.7	-240.901					91.5	-54.9908
			224.6	-242.013					92	-54.8885
			224.5	-243.113					92.5	-55.1009
			224.4	-244.201					93	-54.8754
			224.3	-245.272					93.5	-54.8298
			224.2	-246.324					94	-54.6036
			224.1	-247.353					94.5	-54.8224
			224	-248.355					95	-54.8014
			223.9	-249.338
			223.8	-250.306
			223.7	-251.255
			223.6	-252.172
			223.5	-253.047
			223.4	-253.865
			223.3	-254.61
			223.2	-255.291
			223.1	-255.916
			223	-256.483
			222.9	-256.985
			222.8	-257.428
			222.7	-257.809
			222.6	-258.136
			222.5	-258.406
			222.4	-258.614
			222.3	-258.77
			222.2	-258.885
			222.1	-258.966
			222	-259.02
			221.9	-259.051
			221.8	-259.067
			221.7	-259.061
			221.6	-259.029
			221.5	-258.988
			221.4	-258.94
			221.3	-258.871
			221.2	-258.775
			221.1	-258.643
			221	-258.469
			220.9	-258.268
			220.8	-258.05
			220.7	-257.816
			220.6	-257.564
			220.5	-257.293
			220.4	-257.003
			220.3	-256.698
			220.2	-256.39
			220.1	-256.079
			220	-255.754
			219.9	-255.416
			219.8	-255.072
			219.7	-254.732
			219.6	-254.411
			219.5	-254.101
			219.4	-253.786
			219.3	-253.464
			219.2	-253.142
			219.1	-252.815
			219	-252.478
			218.9	-252.127
			218.8	-251.768
			218.7	-251.397
			218.6	-251.02
			218.5	-250.643
			218.4	-250.26
			218.3	-249.87
			218.2	-249.469
			218.1	-249.059
			218	-248.63
			217.9	-248.183
			217.8	-247.721
			217.7	-247.243
			217.6	-246.739
			217.5	-246.203
			217.4	-245.647
			217.3	-245.082
			217.2	-244.51
			217.1	-243.923
			217	-243.339
			216.9	-242.763
			216.8	-242.191
			216.7	-241.627
			216.6	-241.077
			216.5	-240.525
			216.4	-239.968
			216.3	-239.402
			216.2	-238.843
			216.1	-238.308
			216	-237.799
			215.9	-237.323
			215.8	-236.868
			215.7	-236.443
			215.6	-236.054
			215.5	-235.689
			215.4	-235.34
			215.3	-235.001
			215.2	-234.665
			215.1	-234.343
			215	-234.06
			214.9	-233.809
			214.8	-233.584
			214.7	-233.387
			214.6	-233.224
			214.5	-233.072
			214.4	-232.938
			214.3	-232.805
			214.2	-232.657
			214.1	-232.491
			214	-232.326
			213.9	-232.184
			213.8	-232.086
			213.7	-232.019
			213.6	-231.967
			213.5	-231.912
			213.4	-231.847
			213.3	-231.788
			213.2	-231.75
			213.1	-231.72
			213	-231.687
			212.9	-231.658
			212.8	-231.632
			212.7	-231.594
			212.6	-231.543
			212.5	-231.477
			212.4	-231.41
			212.3	-231.333
			212.2	-231.244
			212.1	-231.146
			212	-231.037
			211.9	-230.906
			211.8	-230.775
			211.7	-230.673
			211.6	-230.618
			211.5	-230.608
			211.4	-230.632
			211.3	-230.679
			211.2	-230.766
			211.1	-230.889
			211	-231.084
			210.9	-231.362
			210.8	-231.737
			210.7	-232.163
			210.6	-232.618
			210.5	-233.088
			210.4	-233.549
			210.3	-233.972
			210.2	-234.378
			210.1	-234.779
			210	-235.18
			209.9	-235.555
			209.8	-235.903
			209.7	-236.226
			209.6	-236.519
			209.5	-236.799
			209.4	-237.092
			209.3	-237.397
			209.2	-237.702
			209.1	-237.993
			209	-238.264
			208.9	-238.545
			208.8	-238.857
			208.7	-239.187
			208.6	-239.536
			208.5	-239.856
			208.4	-240.094
			208.3	-240.191
			208.2	-240.147
			208.1	-239.98
			208	-239.689
			207.9	-239.275
			207.8	-238.765
			207.7	-238.12
			207.6	-237.34
			207.5	-236.406
			207.4	-235.351
			207.3	-234.179
			207.2	-232.894
			207.1	-231.511
			207	-230.087
			206.9	-228.634
			206.8	-227.175
			206.7	-225.703
			206.6	-224.214
			206.5	-222.75
			206.4	-221.29
			206.3	-219.805
			206.2	-218.276
			206.1	-216.7
			206	-215.065
			205.9	-213.386
			205.8	-211.659
			205.7	-209.89
			205.6	-208.053
			205.5	-206.135
			205.4	-204.127
			205.3	-202.048
			205.2	-199.931
			205.1	-197.812
			205	-195.664
			204.9	-193.443
			204.8	-191.134
			204.7	-188.743
			204.6	-186.292
			204.5	-183.718
			204.4	-181.005
			204.3	-178.13
			204.2	-175.12
			204.1	-172.028
			204	-168.859
			203.9	-165.616
			203.8	-162.326
			203.7	-158.938
			203.6	-155.447
			203.5	-151.834
			203.4	-148.056
			203.3	-144.158
			203.2	-140.148
			203.1	-135.98
			203	-131.736
			202.9	-127.419
			202.8	-123.037
			202.7	-118.564
			202.6	-113.953
			202.5	-109.231
			202.4	-104.373
			202.3	-99.3699
			202.2	-94.1411
			202.1	-88.7708
			202	-83.189
			201.9	-77.4808
			201.8	-71.7284
			201.7	-65.9213
			201.6	-59.9661
			201.5	-53.9886
			201.4	-48.0839
			201.3	-42.2268
			201.2	-36.2835
			201.1	-30.1031
			201	-23.7515
			200.9	-17.3765
			200.8	-10.8926
			200.7	-4.17661
			200.6	2.80376
			200.5	10.101
			200.4	17.4579
			200.3	25.1403
			200.2	33.5706
			200.1	42.5431
			200	51.715
