# Supplementary material for: Human LINE-1 retrotransposition requires a metastable coiled coil and a positively charged N-terminus in L1ORF1p
Source: eLife journal article supplement (doi:10.7554/elife.34960), 2018-03-22
Supplement: supp [file elife-34960-supp-v1.zip › elife_poa_e34960_Figure_6_source_data_1.xlsx]

## Sheet: Figure 6
Figure 6A
	Experiment 1			Experiment 2			Experiment 3
	Relative	Relative	Normalized	Relative	Relative	Normalized	Relative	Relative	Normalized
	L1	transfection	L1	L1	transfection	L1	L1	transfection	L1		standard
	activity	efficiency	activity	activity	efficiency	activity	activity	efficiency	activity	average	deviation
pCEP4-L1.3 ORF1 wt	1	1	1	1	1	1	1	1	1	1	0
pCEP4-L1.3 ORF1 Δ2-88	0	0.828193	0	0	0.875556	0	0	1.01258	0	0	0
pCEP4-L1.3 ORF1 Δ52-103	0	1.19697	0	0	1.40124	0	0	1.34751	0	0	0
pCEP4-L1.3 ORF1 Δ52-89	0	0.993292	0	0	1.17965	0	0	0.98719	0	0	0
pCEP4-L1.3 ORF1 Δ52-65	0	0.964642	0	0	0.971437	0	0	0.923502	0	0	0
pCEP4-L1.3 ORF1 Δ91-93	0	0.927239	0	0	1.04879	0	0	1.01413	0	0	0
Figure 6B
	Experiment 1			Experiment 2			Experiment 3
	Relative	Relative	Normalized	Relative	Relative	Normalized	Relative	Relative	Normalized
	L1	transfection	L1	L1	transfection	L1	L1	transfection	L1		standard
	activity	efficiency	activity	activity	efficiency	activity	activity	efficiency	activity	average	deviation
pCEP4-L1.3 ORF1 wt	1	1	1	1	1	1	1	1	1	1	0
pCEP4-L1.3 ORF1 R135N	1.04221	1.09271	0.953786	0.798077	1.09074	0.731682	0.69969	0.950259	0.736316	0.807261	0.126915
pCEP4-L1.3 ORF1 R135I	0.474026	1.38435	0.342419	0.355769	1.19696	0.297227	0.323529	1.20257	0.269031	0.302892	0.0370205
pCEP4-L1.3 ORF1 G132V	0.668831	1.13369	0.58996	0.733974	1.15779	0.633944	0.616099	1.08893	0.565786	0.596563	0.0345552
pCEP4-L1.3 ORF1 N142I	0.805195	1.07542	0.748727	0.891026	0.978734	0.910386	0.578947	0.884889	0.65426	0.771124	0.129523
pCEP4-L1.3 ORF1 G132I/R135I	0	0.68476	0	0	0.990948	0	0	0.635609	0	0	0
pCEP4-L1.3 ORF1 G132I/R135I/N142I	0	0.682302	0	0	1.12919	0	0	0.606636	0	0	0
Figure 6C
	Experiment 1			Experiment 2			Experiment 3
	Relative	Relative	Normalized	Relative	Relative	Normalized	Relative	Relative	Normalized
	L1	transfection	L1	L1	transfection	L1	L1	transfection	L1		standard
	activity	efficiency	activity	activity	efficiency	activity	activity	efficiency	activity	average	deviation
pCEP4-L1.3 ORF1 wt	1	1	1	1	1	1	1	1	1	1	0
pCEP4-L1.3 ORF1 L93N/L100N	0	0.645996	0	0	1.04747	0	0	0.703939	0	0	0
pCEP4-L1.3 ORF1 L107N/L114N	0	1.07527	0	0	1.36632	0	0	0.945241	0	0	0
pCEP4-L1.3 ORF1 C104I/C111I	0.337359	0.638115	0.528681	0.389671	0.740658	0.526115	0.443795	0.586623	0.756524	0.603774	0.132292
Figure 6D
	Experiment 1			Experiment 2			Experiment 3
	Relative	Relative	Normalized	Relative	Relative	Normalized	Relative	Relative	Normalized
	L1	transfection	L1	L1	transfection	L1	L1	transfection	L1		standard
	activity	efficiency	activity	activity	efficiency	activity	activity	efficiency	activity	average	deviation
pCEP4-L1.3 ORF1 wt	1	1	1	1	1	1	1	1	1	1	0
pCEP4-L1.3 ORF1 C86S	0.213139	1.05483	0.202059	0.221766	0.861497	0.257419	0.123377	1.18085	0.104481	0.187986	0.0774342
