# Supplementary material for: Human LINE-1 retrotransposition requires a metastable coiled coil and a positively charged N-terminus in L1ORF1p
Source: eLife journal article supplement (doi:10.7554/elife.34960), 2018-03-22
Supplement: supp [file elife-34960-supp-v1.zip › elife_poa_e34960_Figure_7_source_data_1.xlsx]

## Sheet: Figure 7
Figure 7A
	Experiment 1			Experiment 2			Experiment 3
	Relative	Relative	Normalized	Relative	Relative	Normalized	Relative	Relative	Normalized
	L1	transfection	L1	L1	transfection	L1	L1	transfection	L1		standard
	activity	efficiency	activity	activity	efficiency	activity	activity	efficiency	activity	average	deviation
pCEP4-L1.3 ORF1 wt	1	1	1	1	1	1	1	1	1	1	0
pCEP4-L1.3 ORF1 Δ2-51	0	0.938131	0	0	1.05184	0	0	1.01169	0	0	0
pCEP4-L1.3 ORF1 Δ2-28	0	1.03409	0	0	1.39247	0	0	0.942771	0	0	0
pCEP4-L1.3 ORF1 Δ2-21	0	0.915508	0	0	1.25491	0	0	0.946434	0	0	0
pCEP4-L1.3 ORF1 Δ2-16	0	1.21878	0	0	0.936332	0	0	0.975379	0	0	0
pCEP4-L1.3 ORF1 Δ2-11	0	0.866491	0	0	1.12441	0	0	0.756667	0	0	0
pCEP4-L1.3 ORF1 Δ2-6	0	1.16636	0	0	1.07408	0	0	1.17258	0	0	0
Figure 7B
	Experiment 1			Experiment 2			Experiment 3
	Relative	Relative	Normalized	Relative	Relative	Normalized	Relative	Relative	Normalized
	L1	transfection	L1	L1	transfection	L1	L1	transfection	L1		standard
	activity	efficiency	activity	activity	efficiency	activity	activity	efficiency	activity	average	deviation
pCEP4-L1.3 ORF1 wt	1	1	1	1	1	1	1	1	1	1	0
pCEP4-L1.3 ORF1 Δ29-51	0.325547	1.10363	0.294978	0.275154	1.18758	0.231694	0.266234	1.16223	0.229072	0.251915	0.0373171
Figure 7C
	Experiment 1			Experiment 2			Experiment 3
	Relative	Relative	Normalized	Relative	Relative	Normalized	Relative	Relative	Normalized
	L1	transfection	L1	L1	transfection	L1	L1	transfection	L1		standard
	activity	efficiency	activity	activity	efficiency	activity	activity	efficiency	activity	average	deviation
pCEP4-L1.3 ORF1 wt	1	1	1	1	1	1	1	1	1	1	0
pCEP4-L1.3 ORF1 myr	0	0.715364	0	0	0.824468	0	0	0.85414	0	0	0
Figure 7D
	Experiment 1			Experiment 2			Experiment 3
	Relative	Relative	Normalized	Relative	Relative	Normalized	Relative	Relative	Normalized
	L1	transfection	L1	L1	transfection	L1	L1	transfection	L1		standard
	activity	efficiency	activity	activity	efficiency	activity	activity	efficiency	activity	average	deviation
pCEP4-L1.3 ORF1 wt	1	1	1	1	1	1	1	1	1	1	0
pCEP4-L1.3 ORF1 G2A	0.0335766	1.06294	0.0315884	0.0390144	0.945526	0.0412621	0.0487013	1.29093	0.0377256	0.0368587	0.00489478
pCEP4-L1.3 ORF1 K3A	0.0934307	1.12104	0.0833432	0.110883	0.856642	0.129439	0.0844156	1.03033	0.0819309	0.0982377	0.0270304
pCEP4-L1.3 ORF1 K4A	0.078905	0.638558	0.123568	0.0798122	0.688914	0.115852	0.118908	0.640509	0.185647	0.141689	0.0382636
pCEP4-L1.3 ORF1 G2A/K3A	0	0.750673	0	0	1.04689	0	0	0.929716	0	0	0
Figure 7E
	Experiment 1			Experiment 2			Experiment 3
	Relative	Relative	Normalized	Relative	Relative	Normalized	Relative	Relative	Normalized
	L1	transfection	L1	L1	transfection	L1	L1	transfection	L1		standard
	activity	efficiency	activity	activity	efficiency	activity	activity	efficiency	activity	average	deviation
pCEP4-L1.3 ORF1 wt	1	1	1	1	1	1	1	1	1	1	0
pCEP4-L1.3 ORF1 G2R	0.701288	0.580597	1.20787	0.732394	0.686431	1.06696	0.820013	0.557954	1.46968	1.24817	0.204361
pCEP4-L1.3 ORF1 K3R	0.89694	0.585121	1.53291	0.948357	0.658287	1.44064	0.99935	0.578732	1.72679	1.56678	0.146051
Figure 7F
	Experiment 1			Experiment 2			Experiment 3
	Relative	Relative	Normalized	Relative	Relative	Normalized	Relative	Relative	Normalized
	L1	transfection	L1	L1	transfection	L1	L1	transfection	L1		standard
	activity	efficiency	activity	activity	efficiency	activity	activity	efficiency	activity	average	deviation
pCEP4-L1.3 ORF1 wt	1	1	1	1	1	1	1	1	1	1	0
pCEP4-L1.3 ORF1 K13A	0.660225	0.585668	1.1273	0.746479	0.602793	1.23837	0.803119	0.514662	1.56048	1.30872	0.224992
pCEP4-L1.3 ORF1 R48A	0.883212	1.2893	0.685029	0.825462	1.18677	0.695554	0.970779	1.35946	0.714094	0.698226	0.0147154
