# Supplementary material for: Human LINE-1 retrotransposition requires a metastable coiled coil and a positively charged N-terminus in L1ORF1p
Source: eLife journal article supplement (doi:10.7554/elife.34960), 2018-03-22
Supplement: supp [file elife-34960-supp-v1.zip › elife_poa_e34960_Figure_8_figure_supplement_1.pdf]

**A**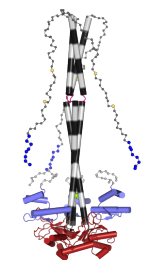

**L1ORF1p  
trimer model**

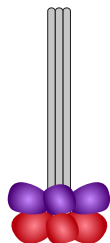

**closed  
conformation**

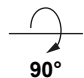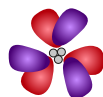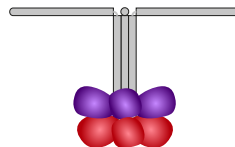

**opened  
conformation**

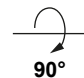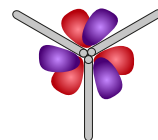**B**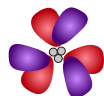

**closed  
conformation**

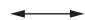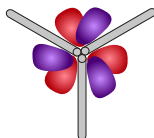

**opened  
conformation**

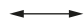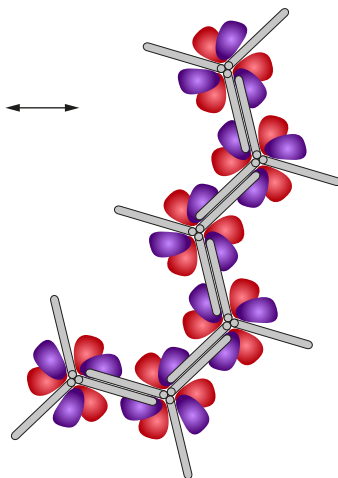

**linear array**

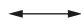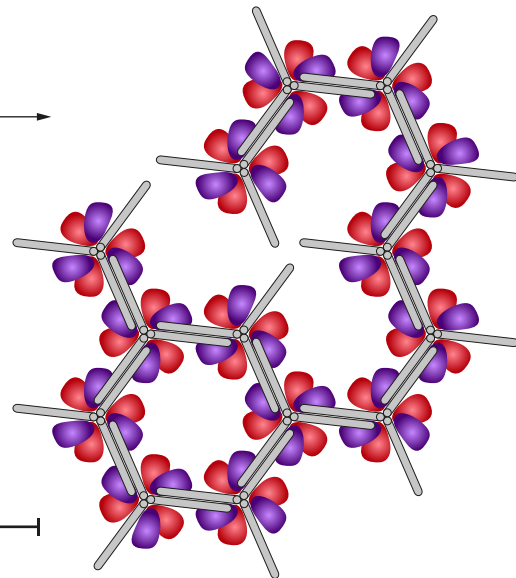

**meshwork**

150 Å
