# Supplementary figures and images for: Human LINE-1 retrotransposition requires a metastable coiled coil and a positively charged N-terminus in L1ORF1p
Source: eLife journal article supplement (doi:10.7554/elife.34960), 2018-03-22

**A**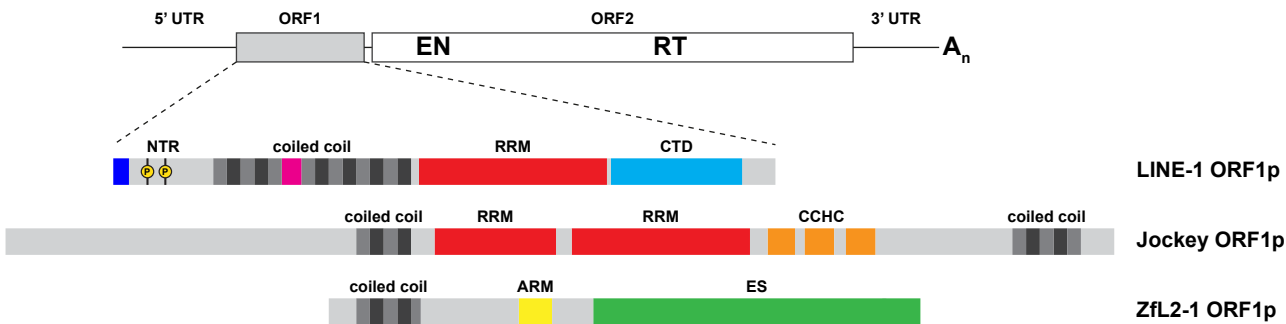**B**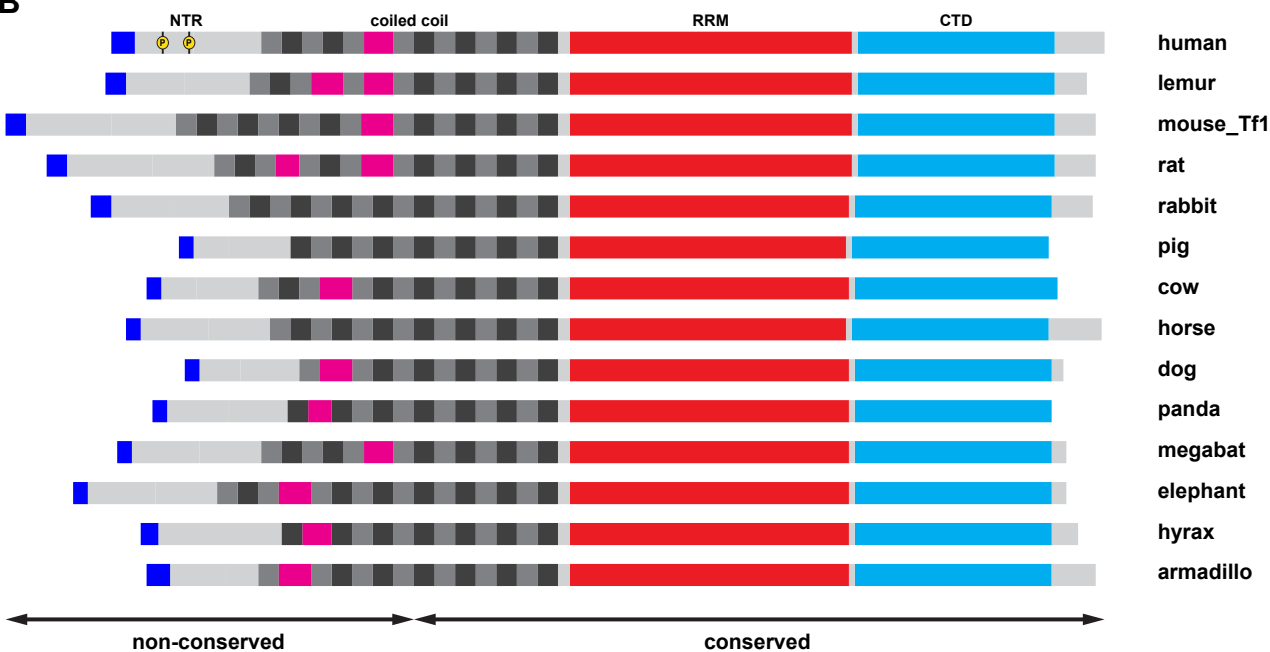**C**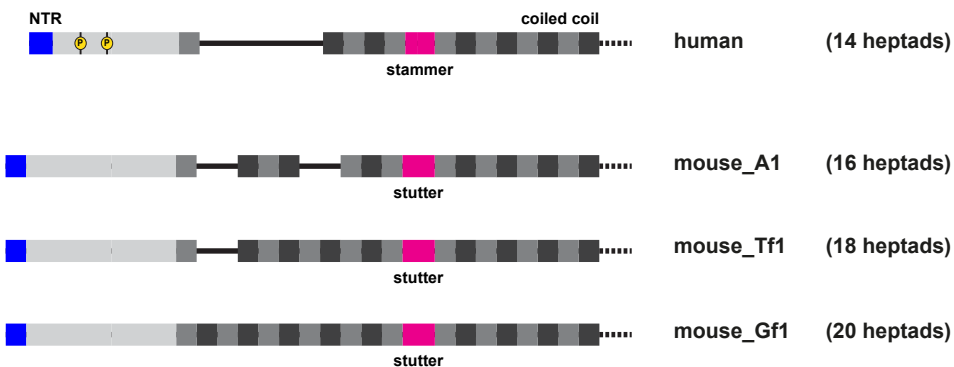

Supplement: supp [file elife-34960-supp-v1.zip › elife_poa_e34960_Figure_1_figure_supplement_1.pdf]

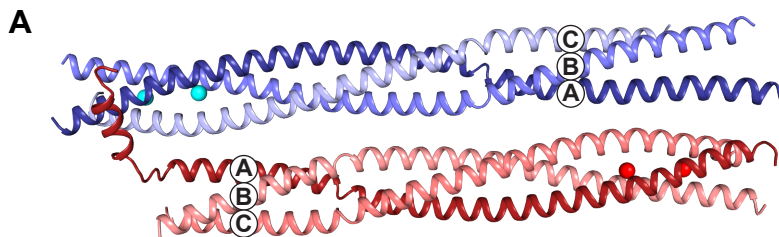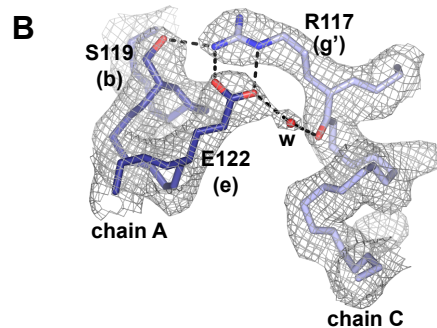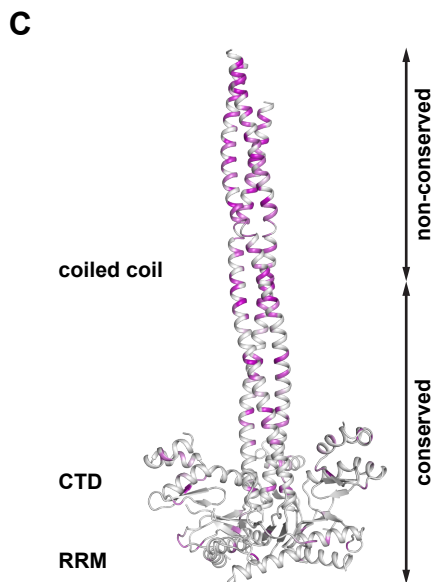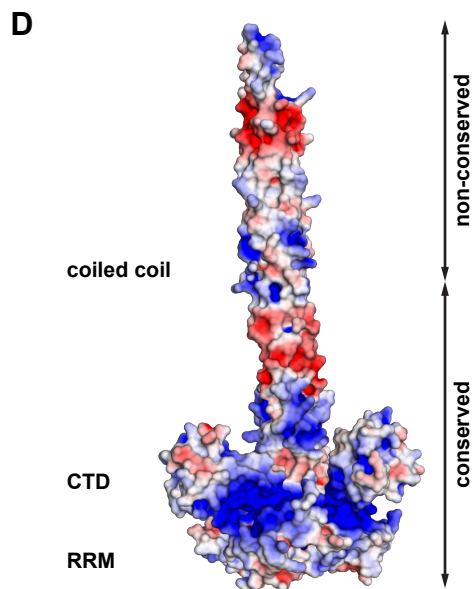

Supplement: supp [file elife-34960-supp-v1.zip › elife_poa_e34960_Figure_2_figure_supplement_1.pdf]

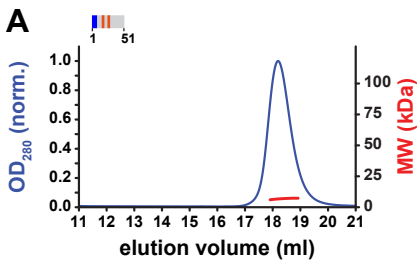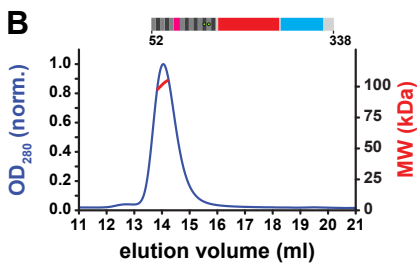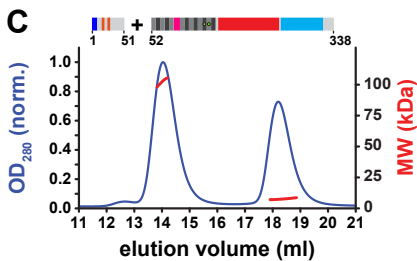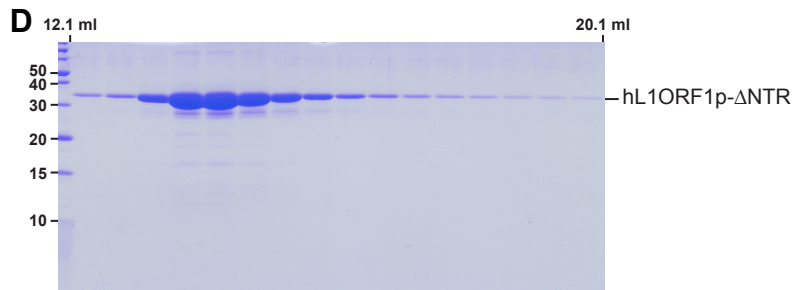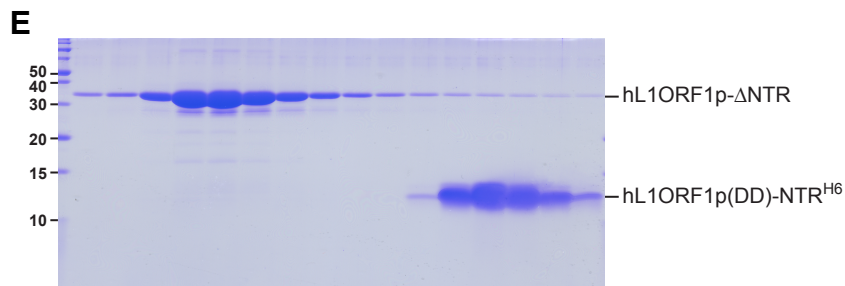

Supplement: supp [file elife-34960-supp-v1.zip › elife_poa_e34960_Figure_4_figure_supplement_2.pdf]

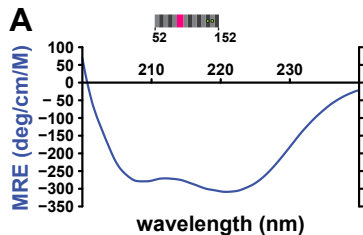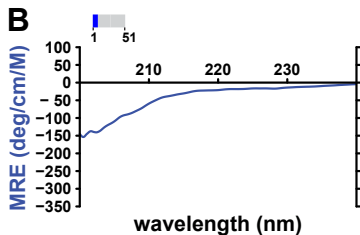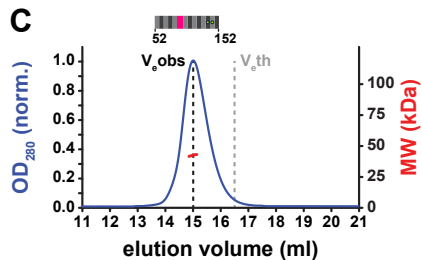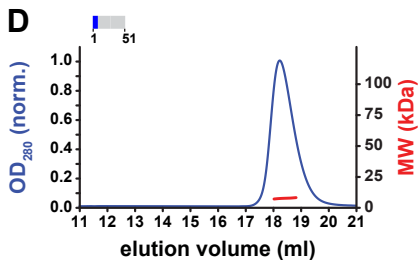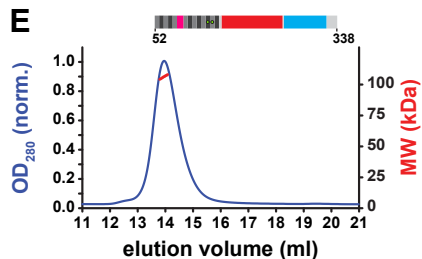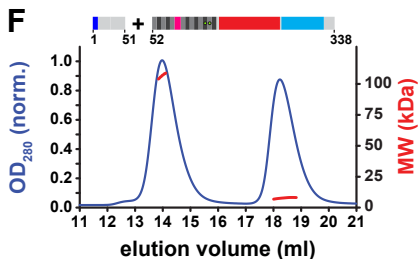

Supplement: supp [file elife-34960-supp-v1.zip › elife_poa_e34960_Figure_4.pdf]

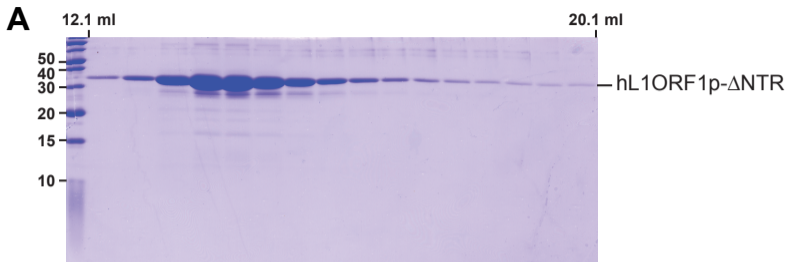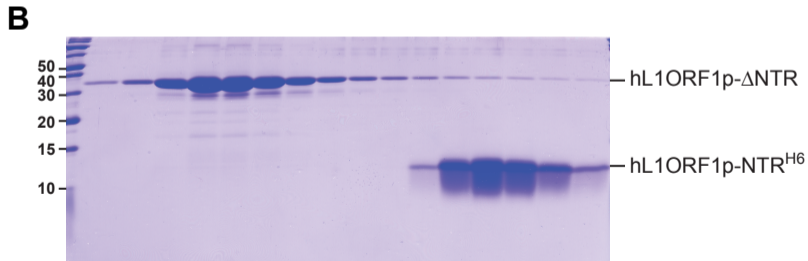

Supplement: supp [file elife-34960-supp-v1.zip › elife_poa_e34960_Figure_4_figure_supplement_1.pdf]

**A**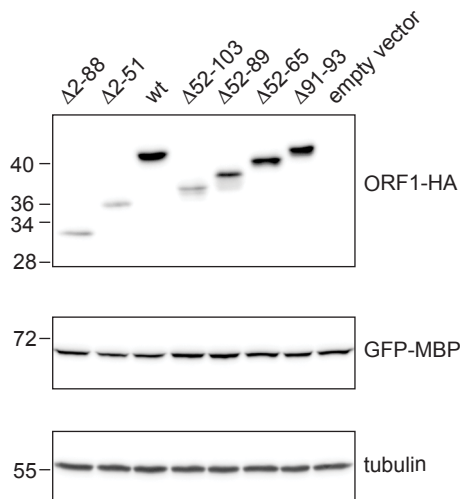**B**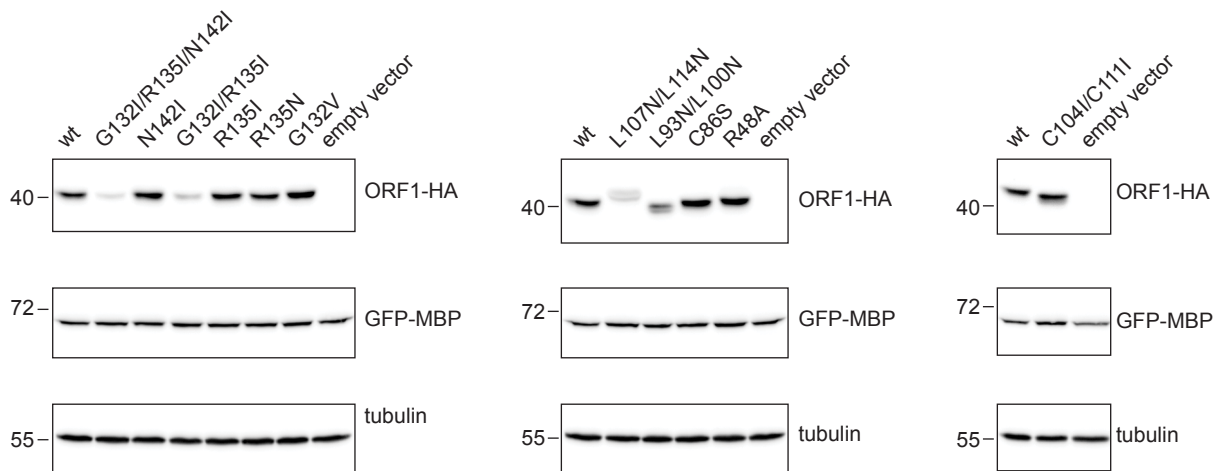

Supplement: supp [file elife-34960-supp-v1.zip › elife_poa_e34960_Figure_6_figure_supplement_1.pdf]

**A**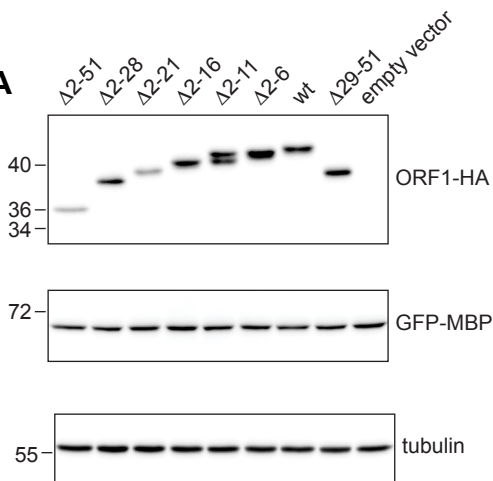**B**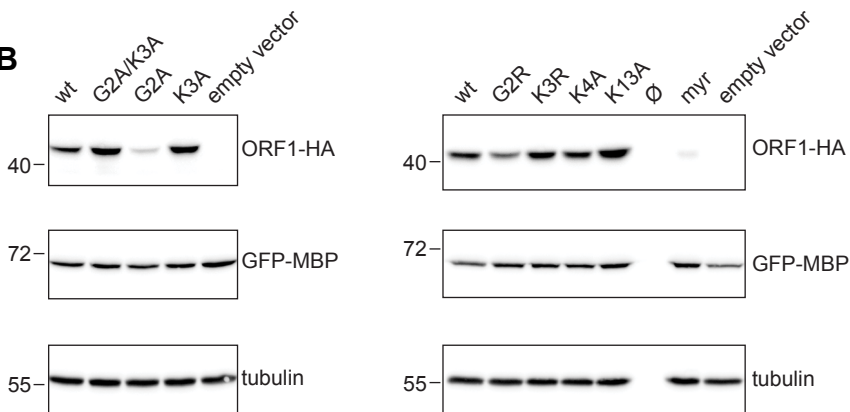

Supplement: supp [file elife-34960-supp-v1.zip › elife_poa_e34960_Figure_7_figure_supplement_1.pdf]

**A**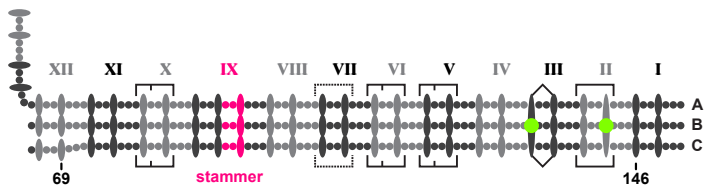**B**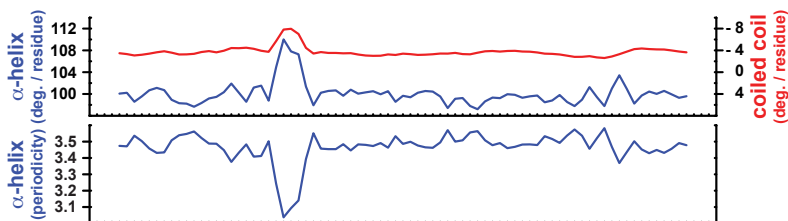**C**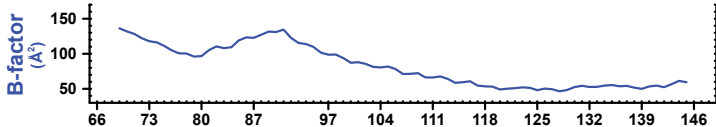**D**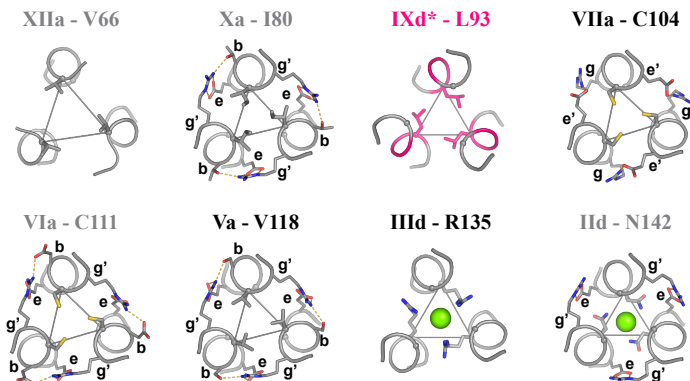

Supplement: supp [file elife-34960-supp-v1.zip › elife_poa_e34960_Figure_3_figure_supplement_1.pdf]
